# Supplementary material
Source: PubMed Central journal article supplement (PMC7392503)

Schleyer et al.  
Extended data file Figure 2-3  
Dendrograms of all mature KCs

Shown are high-resolution dendrograms of all mature KCs of both hemispheres. Output synapses are marked with colored circles, input synapses with colored triangles. The colors indicate with which neuron the respective synapse is formed.

All synapses with DAN-i1 and MBON-i1 are found in the part of the axon that forms the i-compartment of the mushroom body. Synapses of the “other” category contain mostly synapses with olfactory projection neurons in the calyx compartment, as well as modulatory input neurons and MBONs in other compartments. Data are taken from Eichler et al. 2017.

Color legend for all dendrograms:

- |                      |                      |
|----------------------|----------------------|
| ● KC → DAN-i1 left   | ▼ DAN-i1 left → KC   |
| ● KC → DAN-i1 right  | ▼ DAN-i1 right → KC  |
| ● KC → MBON-i1 left  | ▼ Different KCs → KC |
| ● KC → MBON-i1 right | ▼ APL → KC           |
| ● KC → Other KCs     | ▼ “Other” → KC       |
| ● KC → APL           |                      |
| ● KC → “Other”       |                      |

1 claw KC #1 (left)

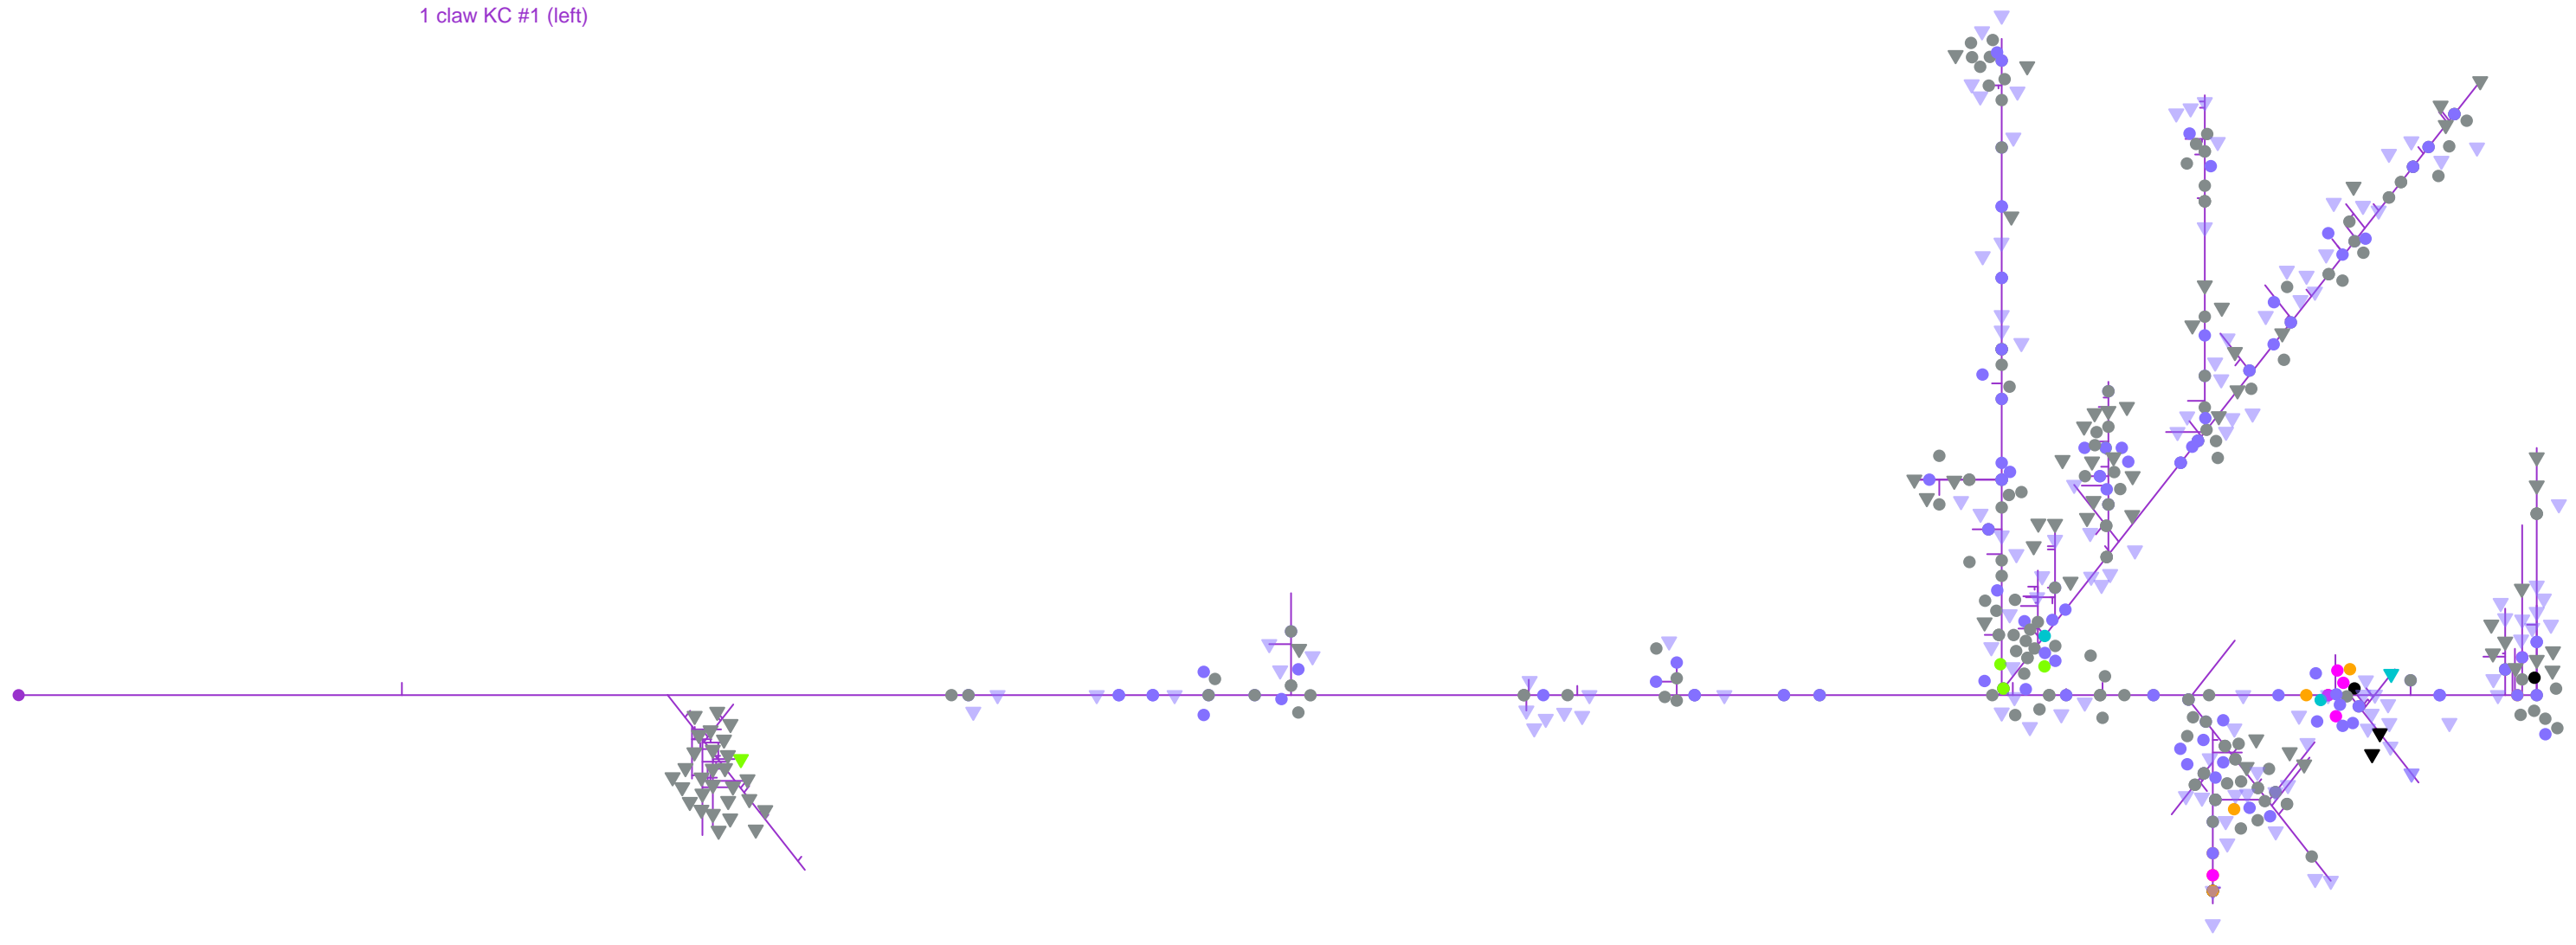

1 claw KC #2 (left)

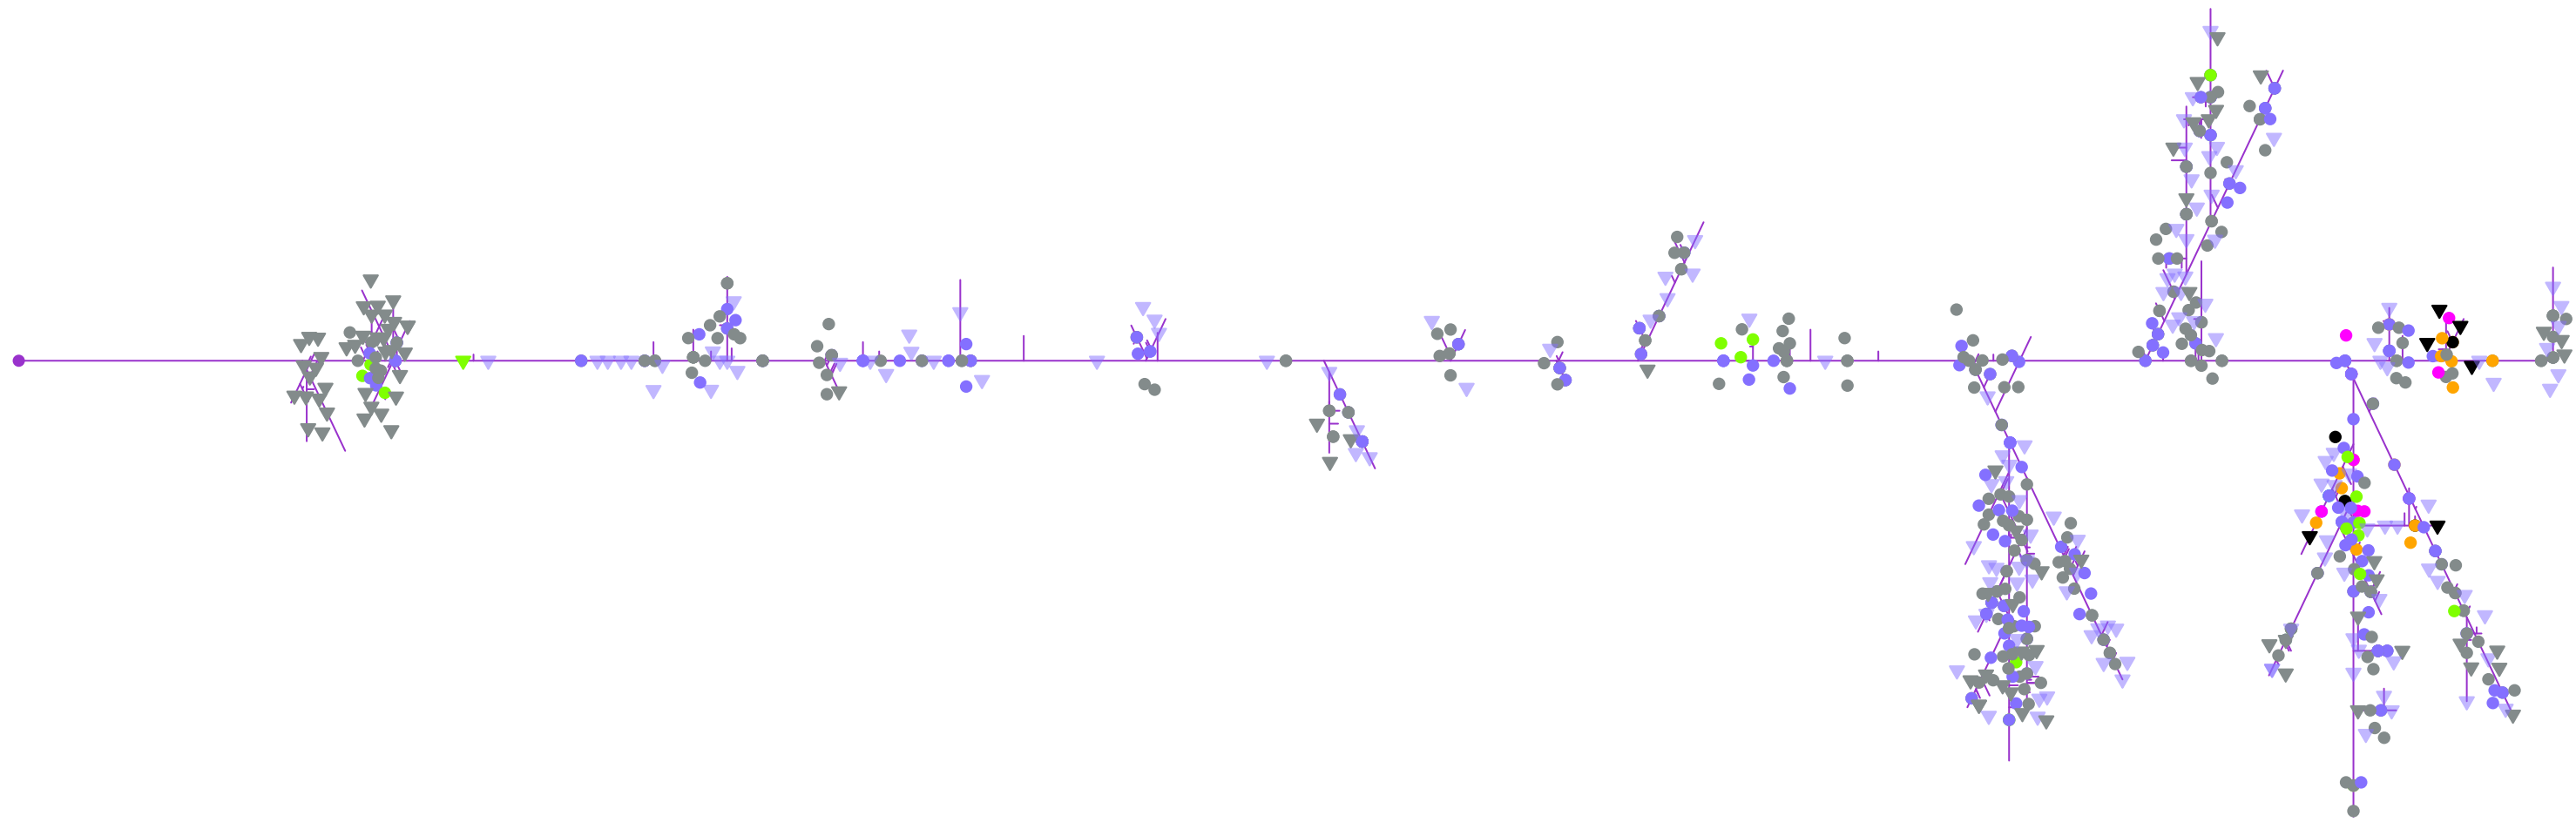

1 claw KC #3 (left)

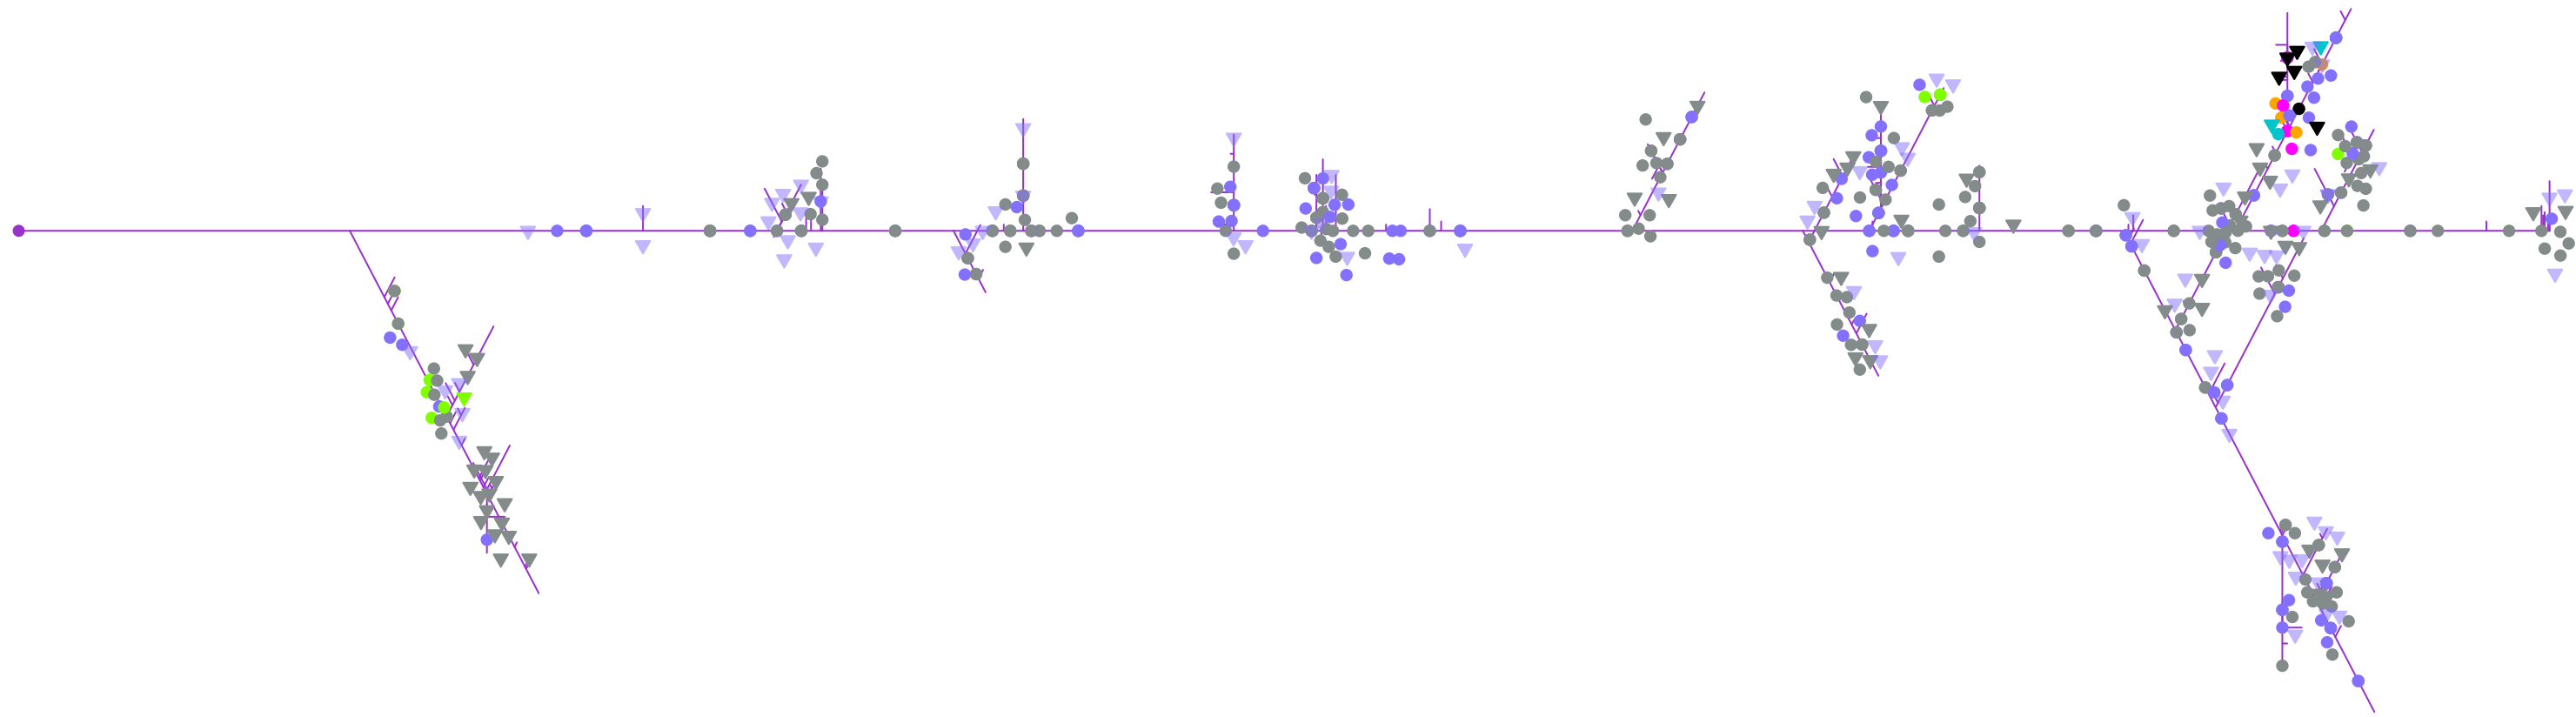

1 claw KC #4 (left)

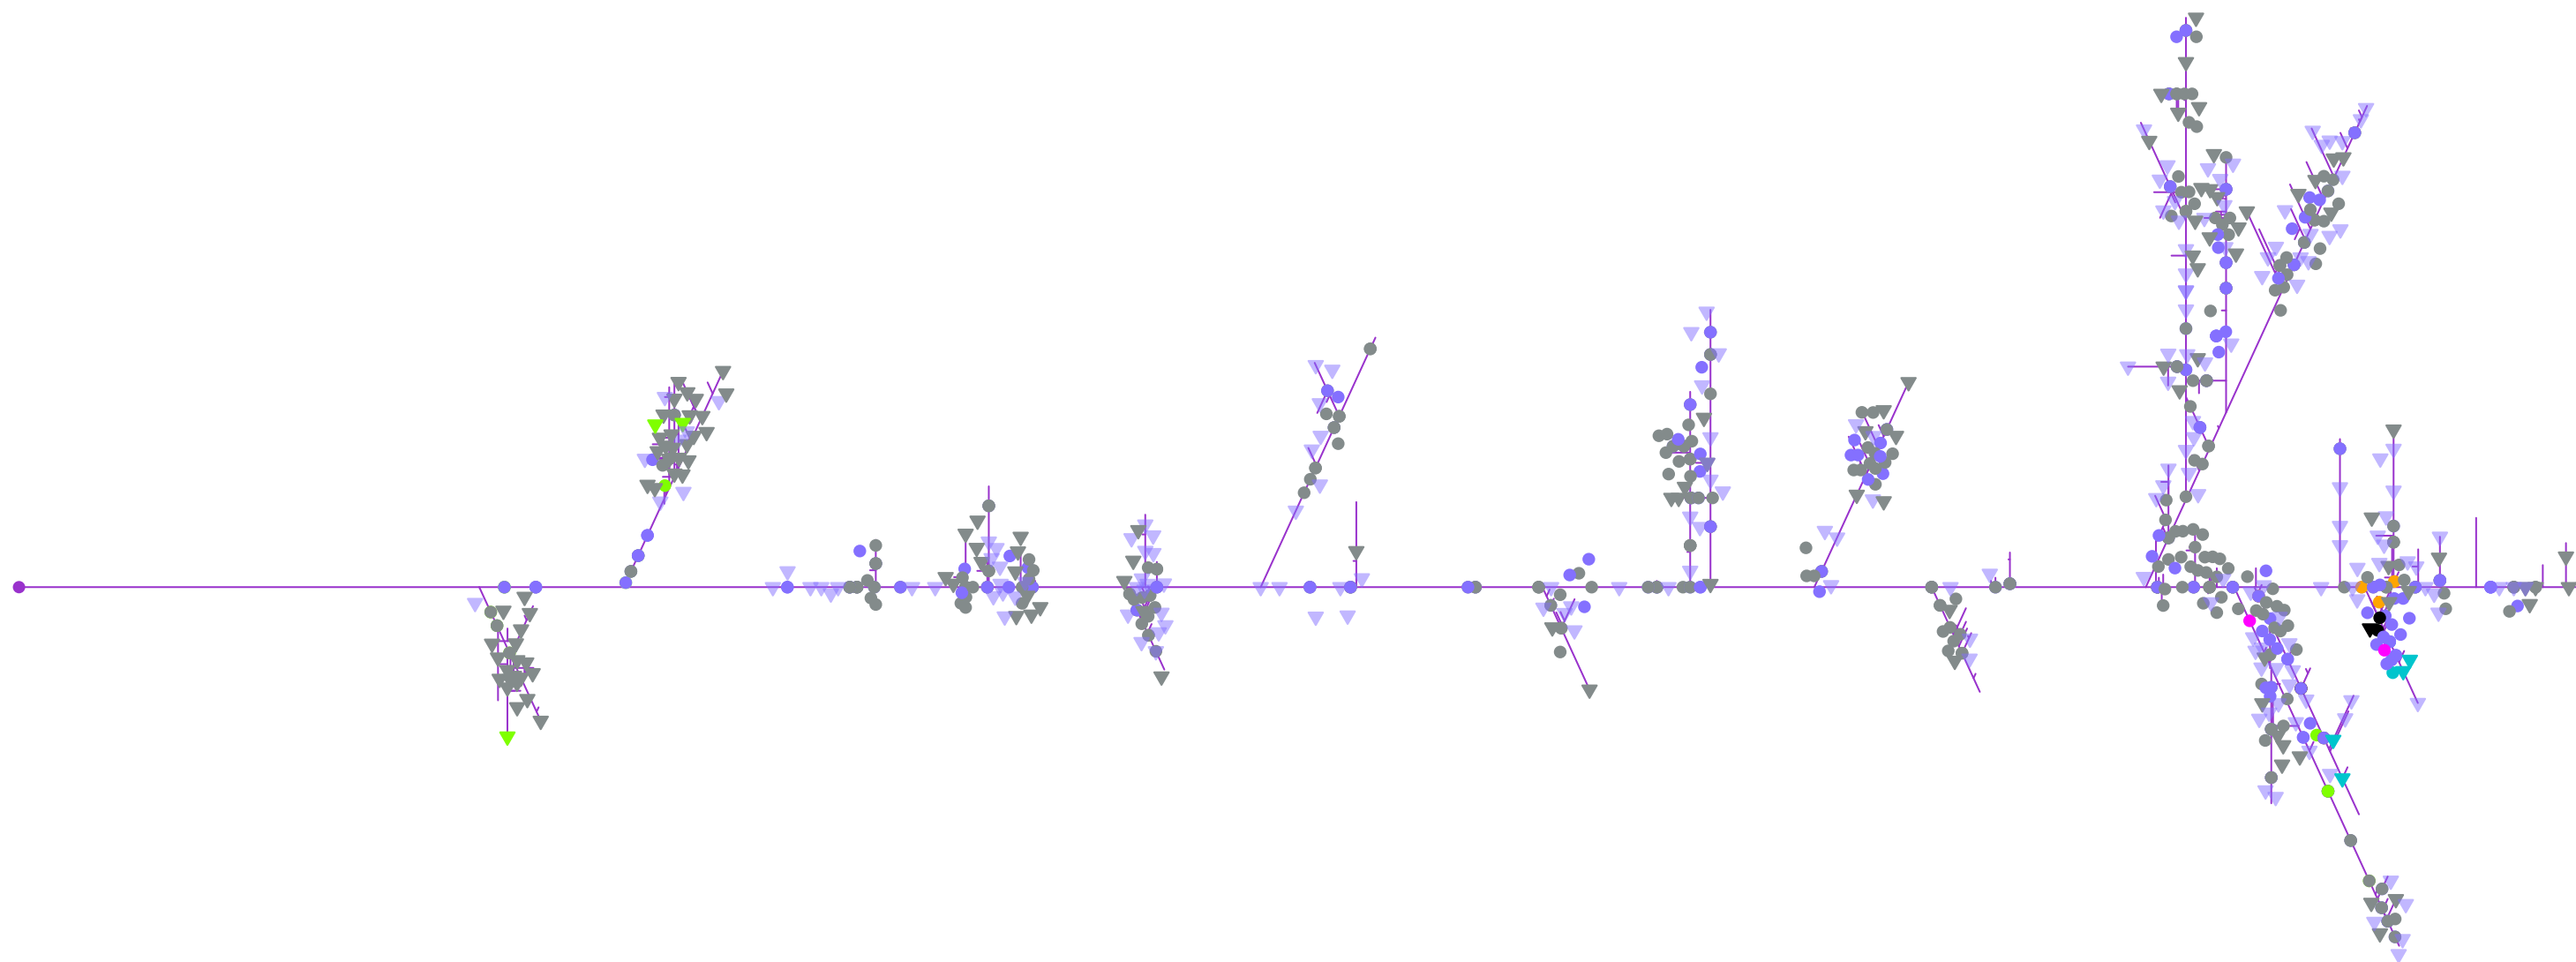

1 claw KC #5 (left)

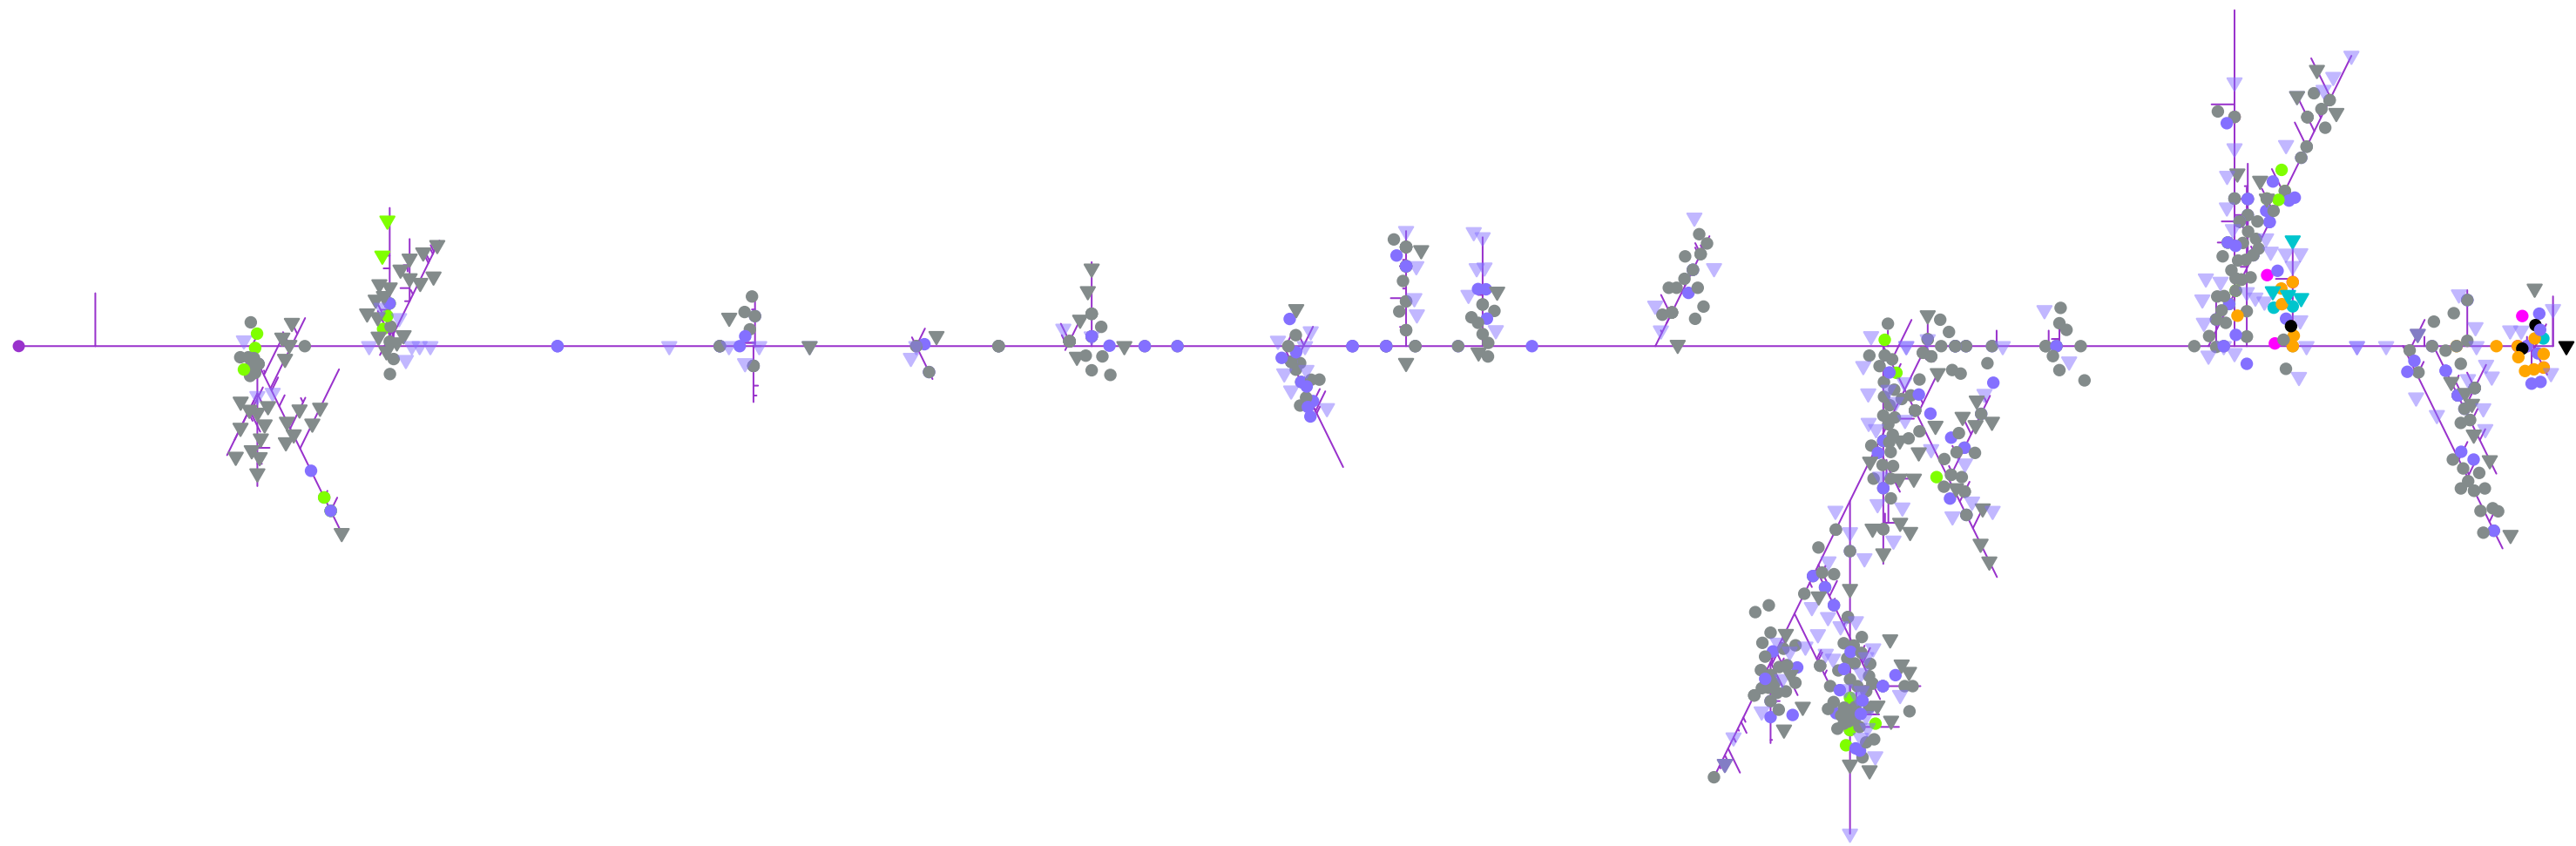

1 claw KC #6 (left)

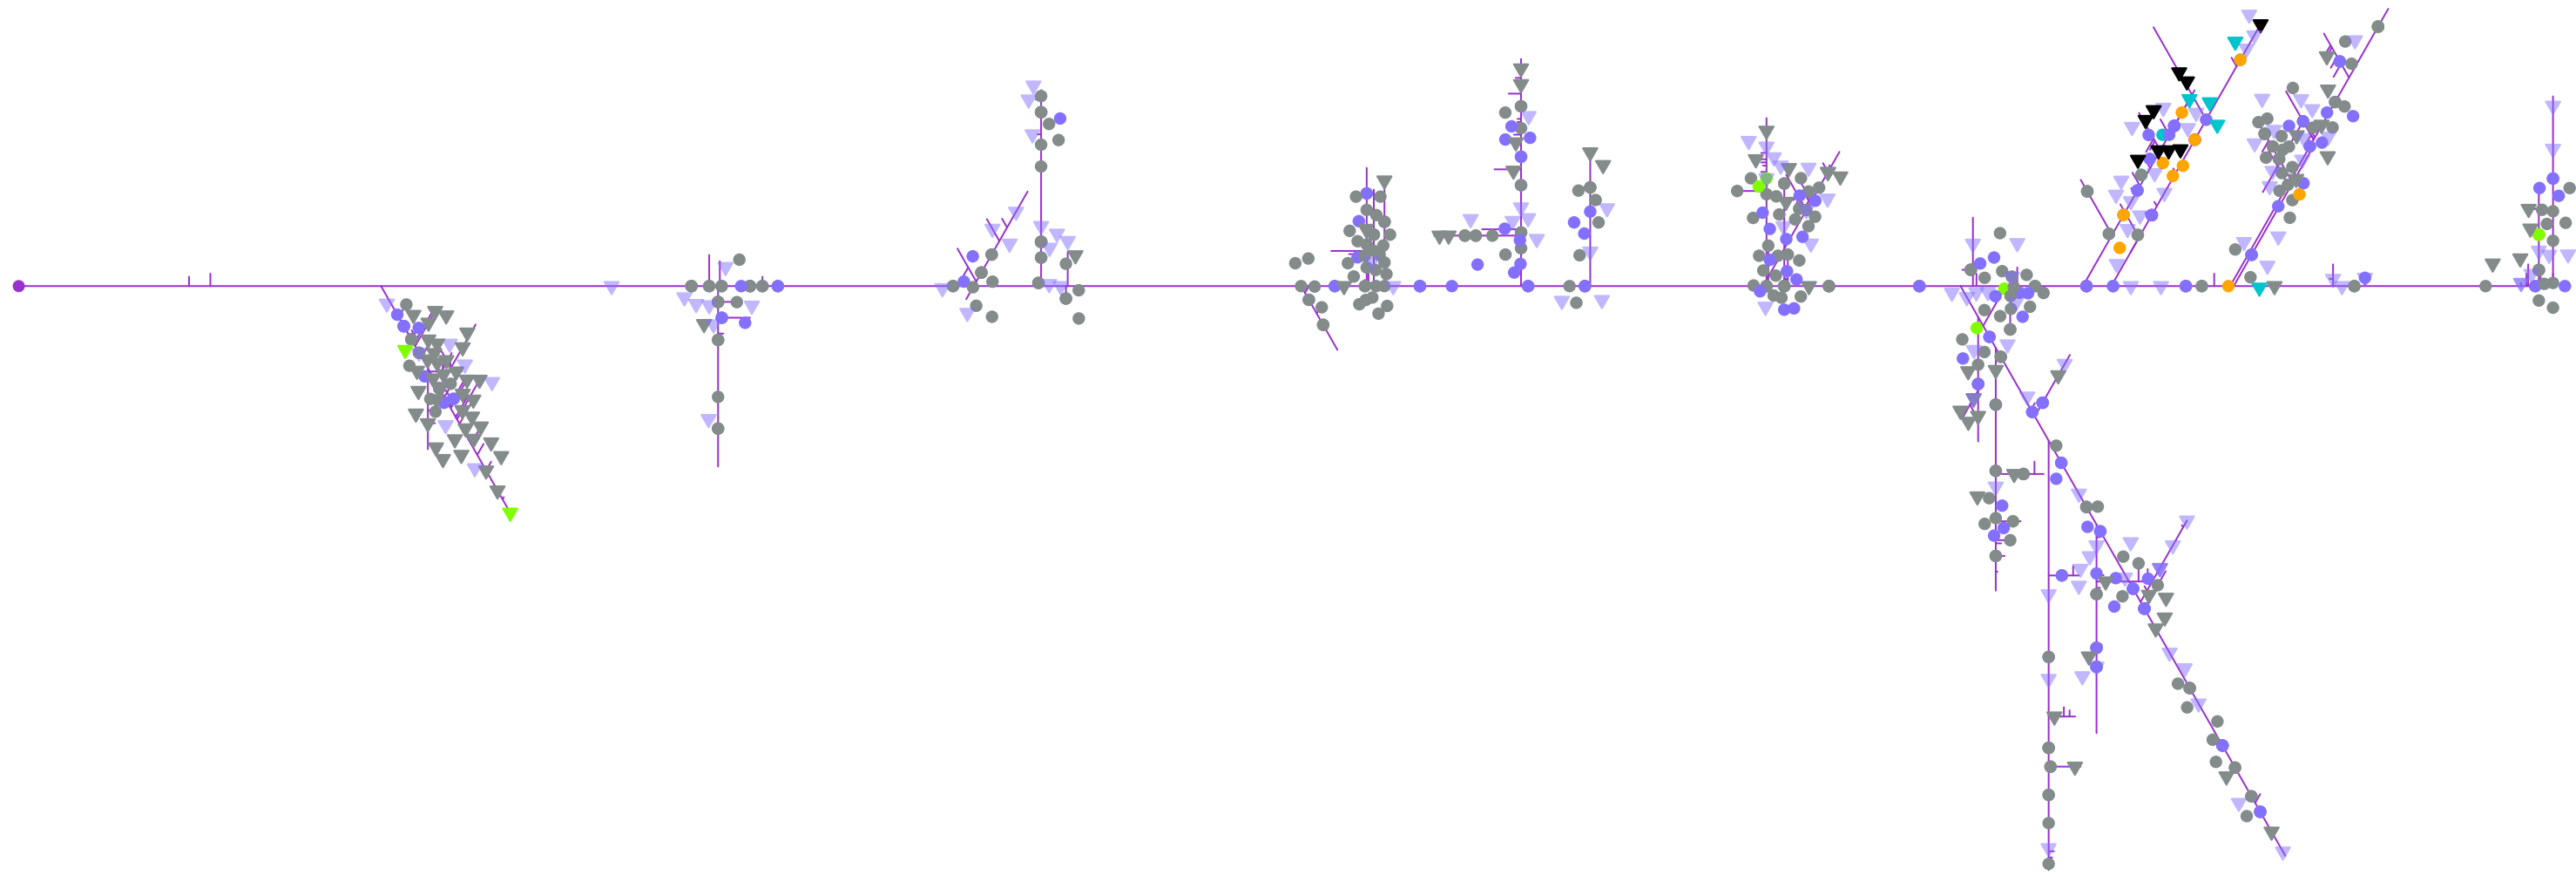

1 claw KC #7 (left)

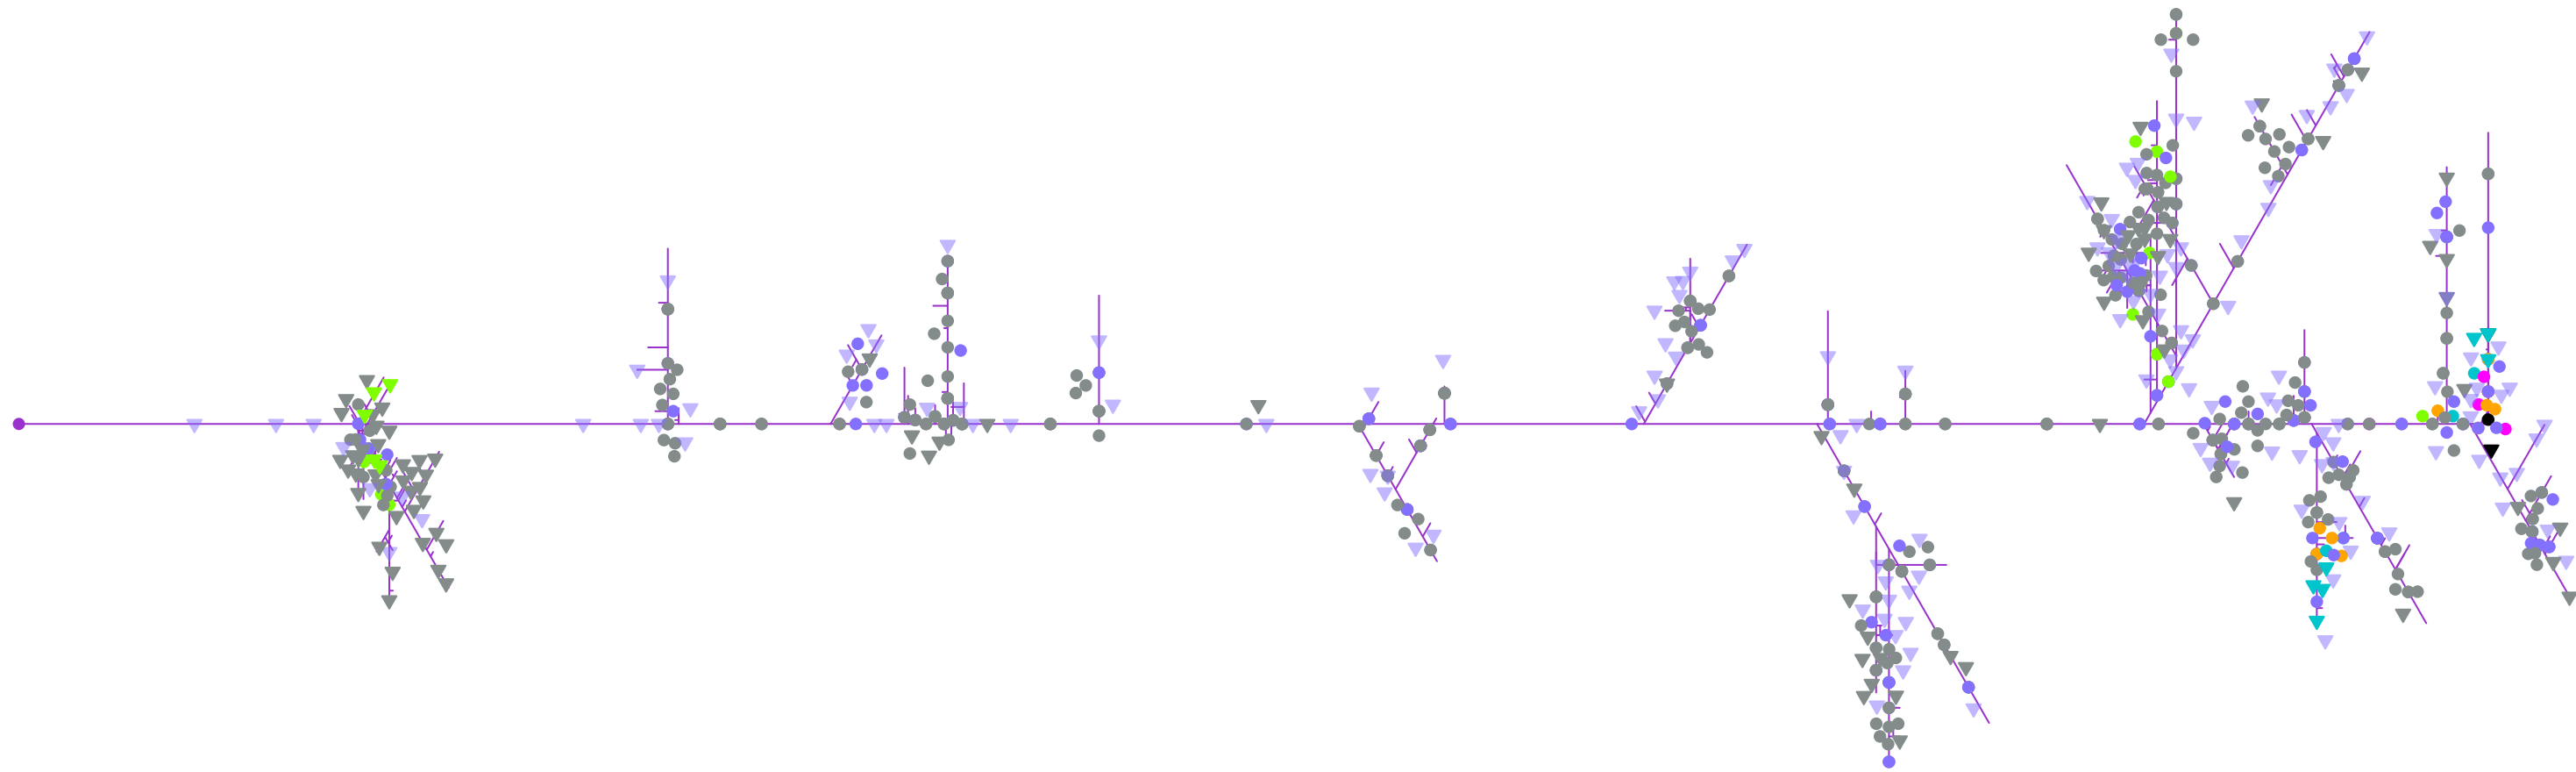



1 claw KC #8 (left)

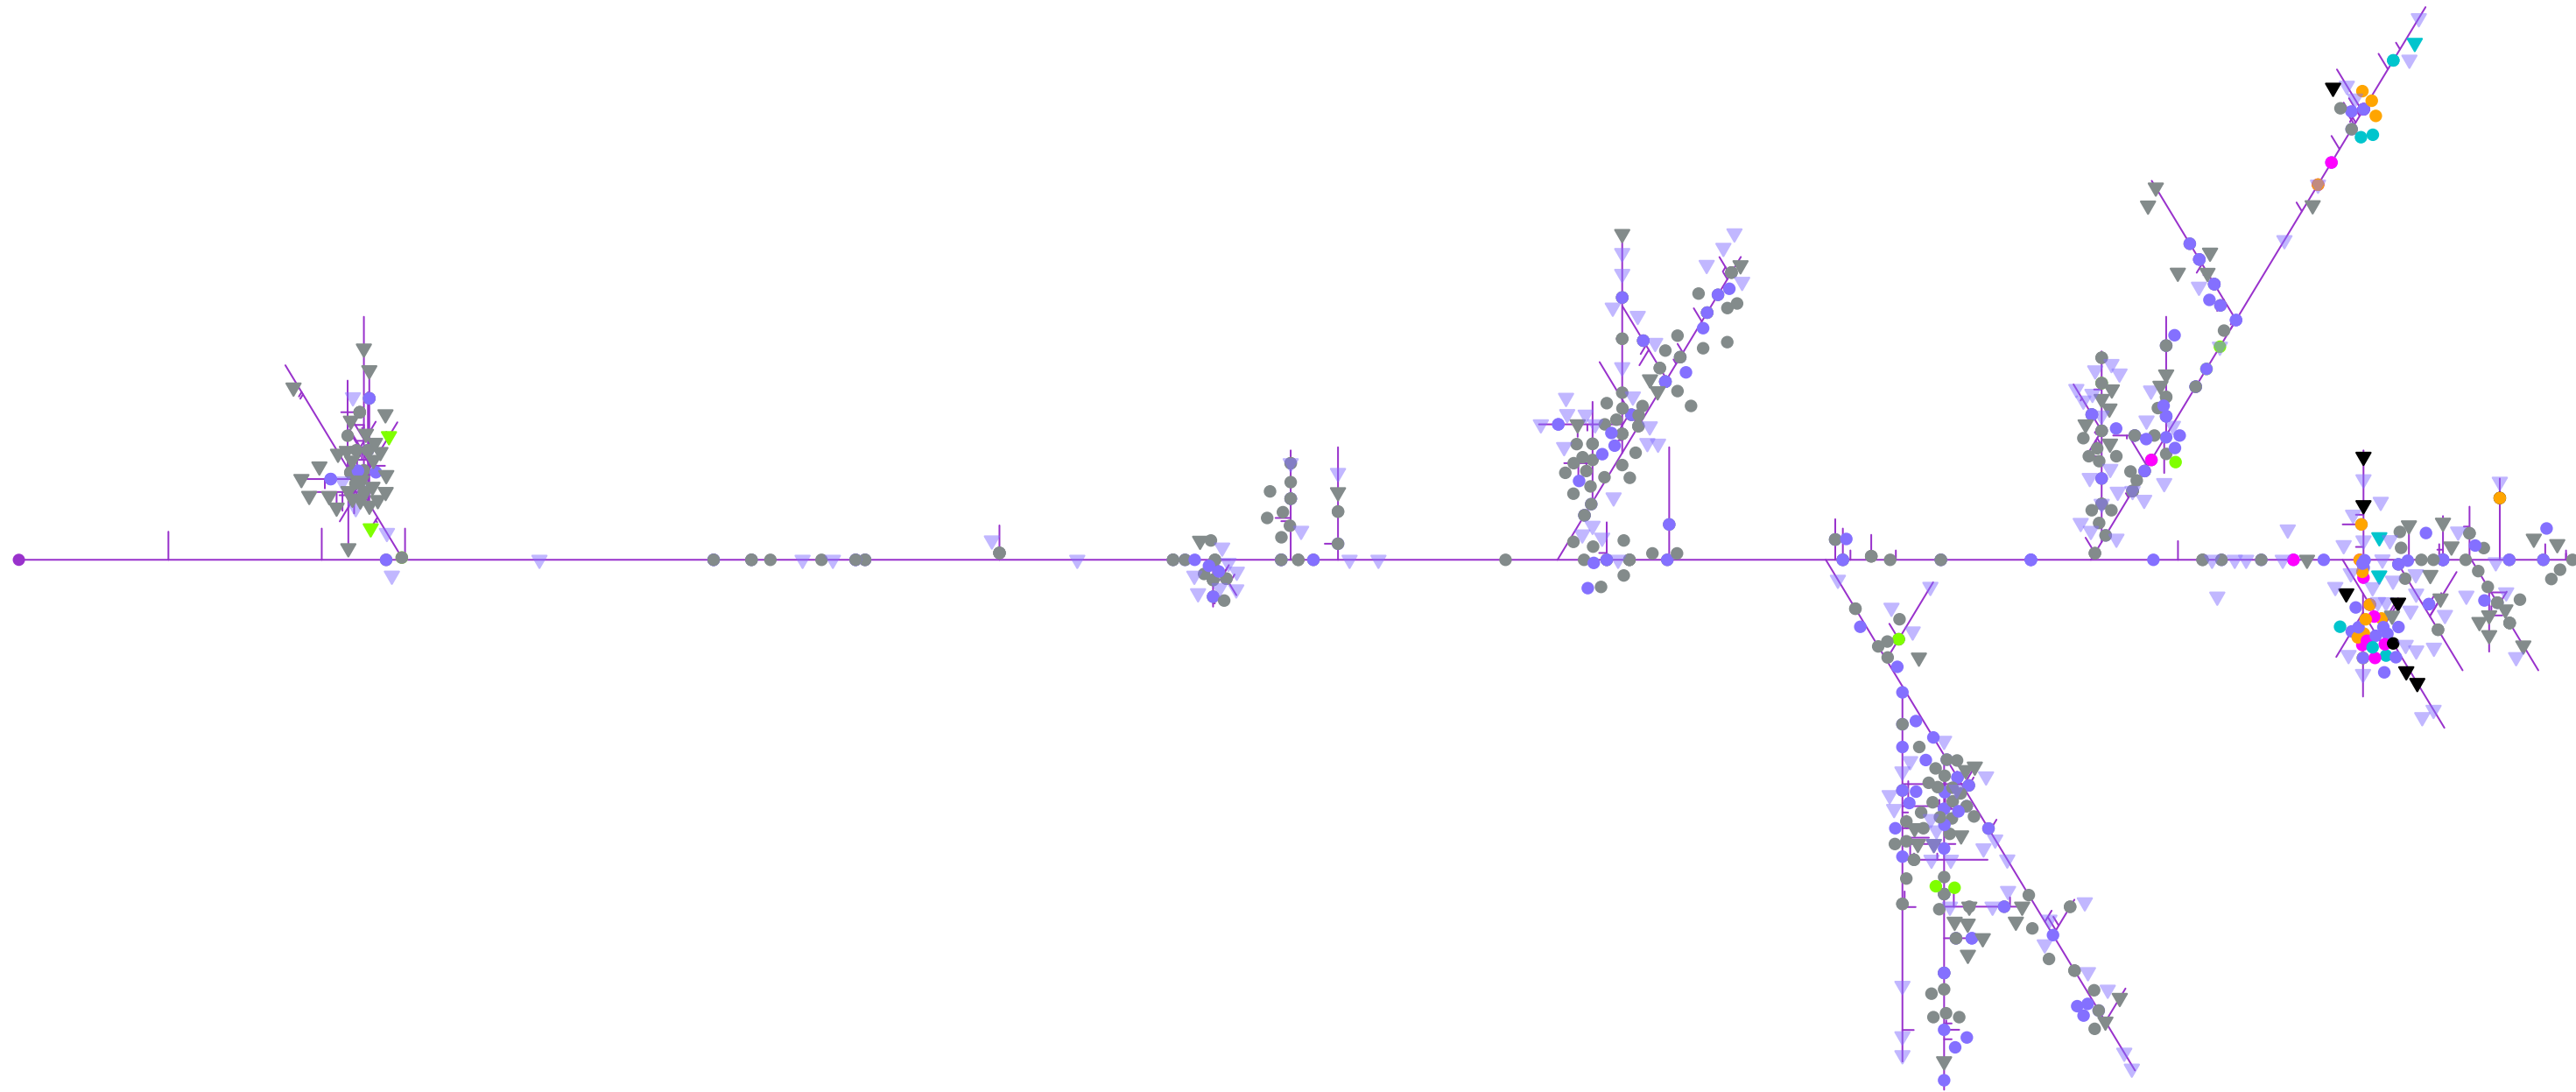

1 claw KC #9 (left)

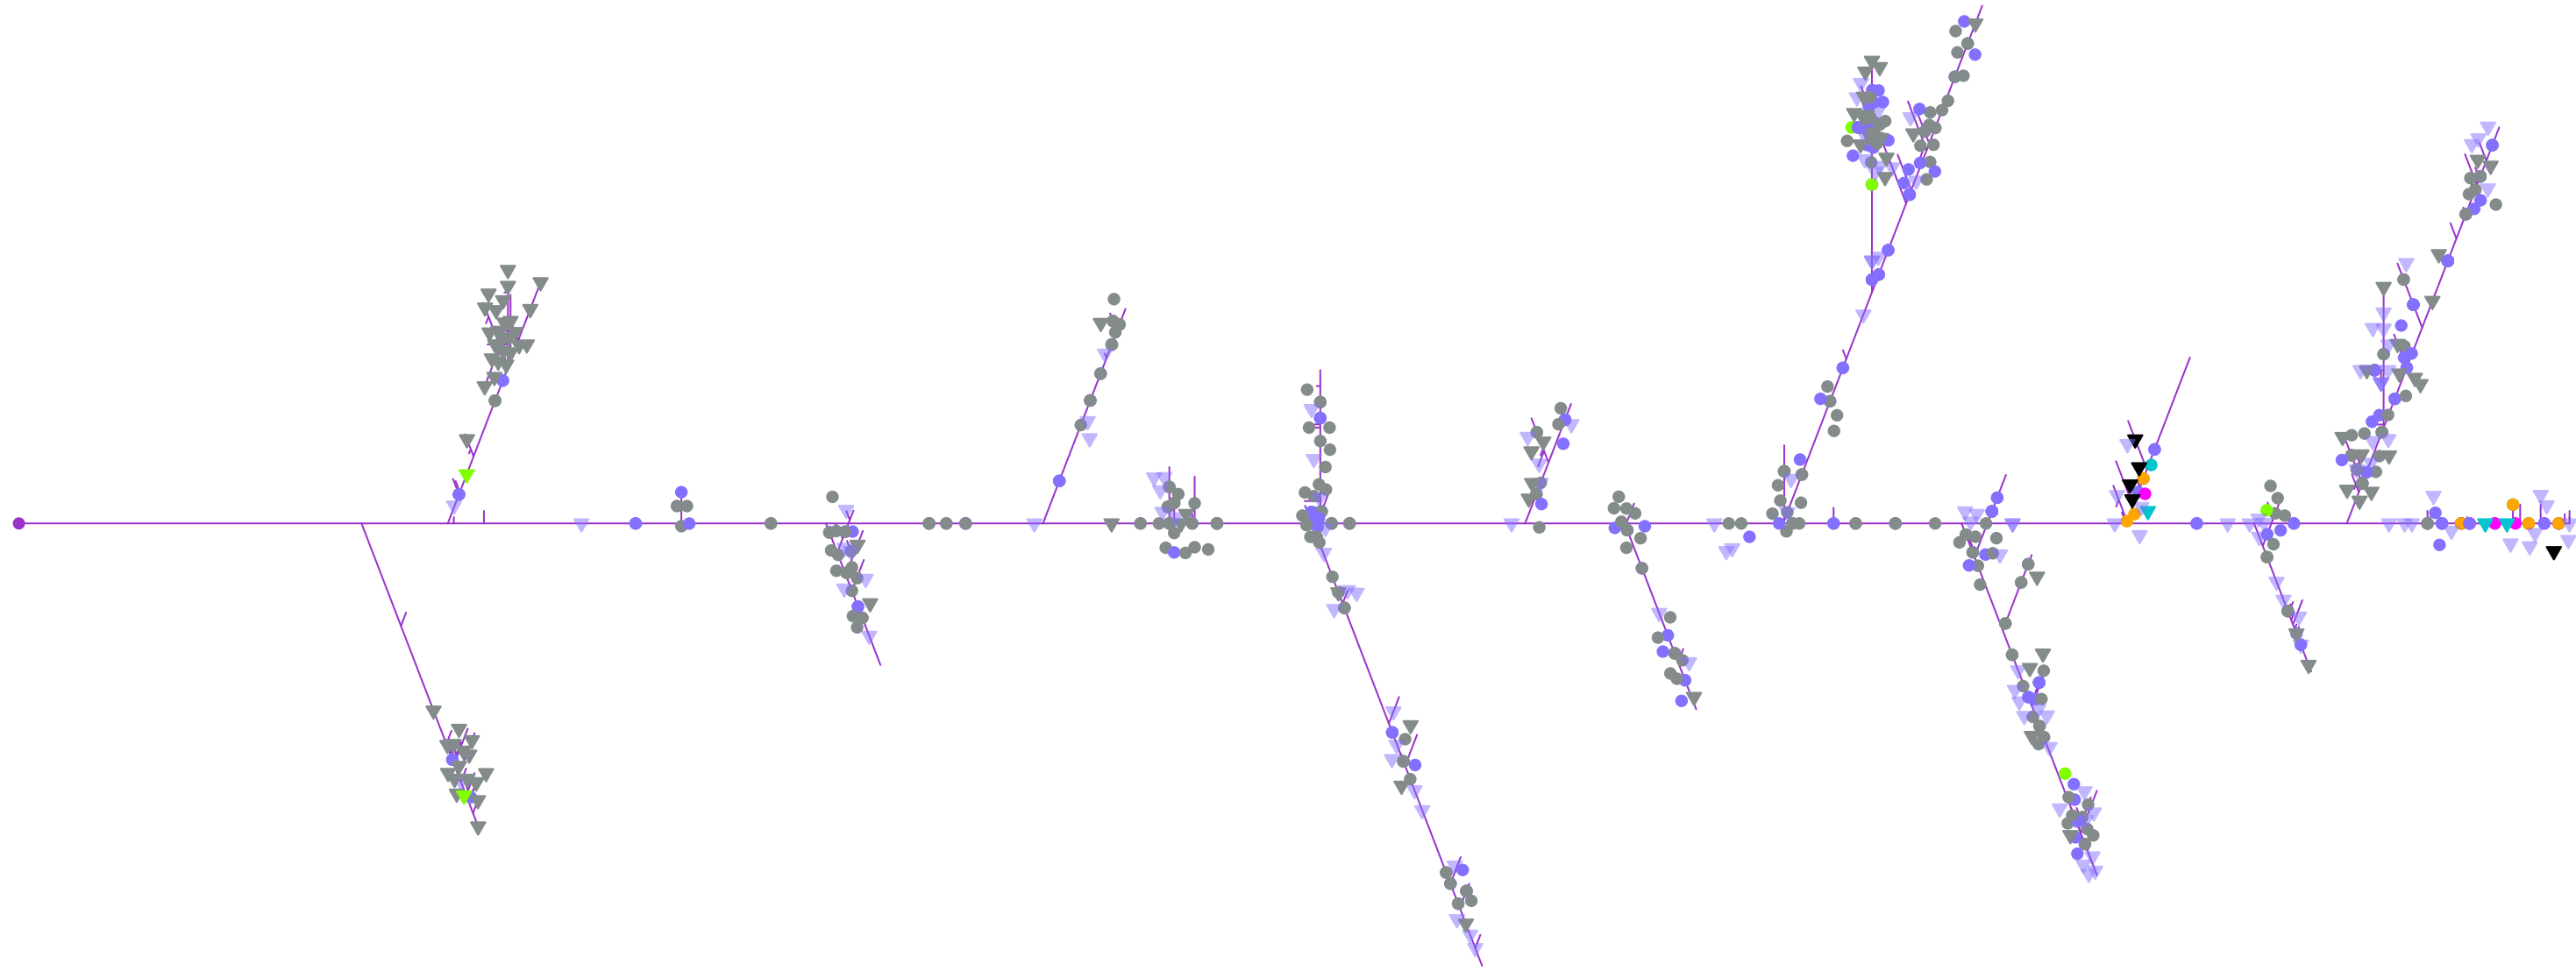

1 claw KC #10 (left)

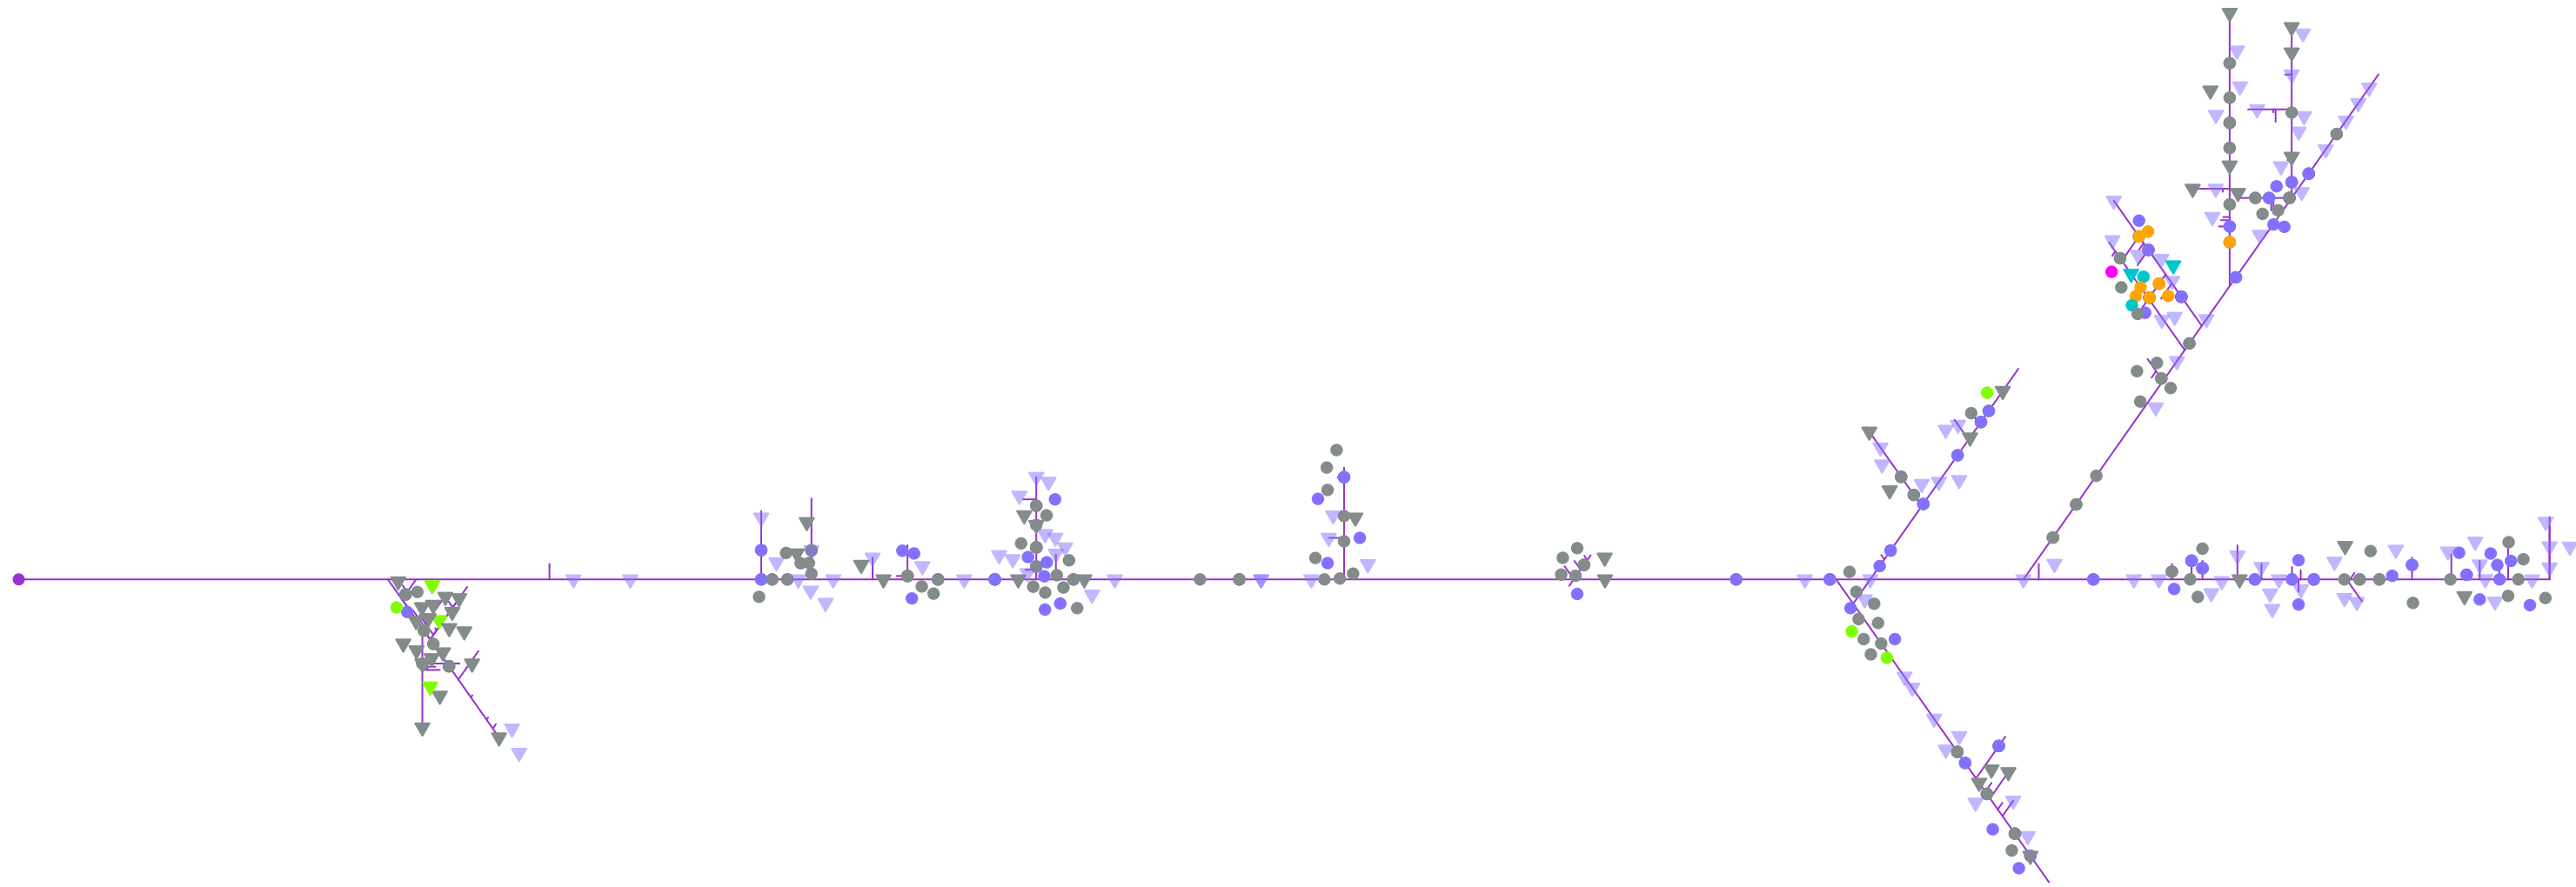

1 claw KC #11 (left)

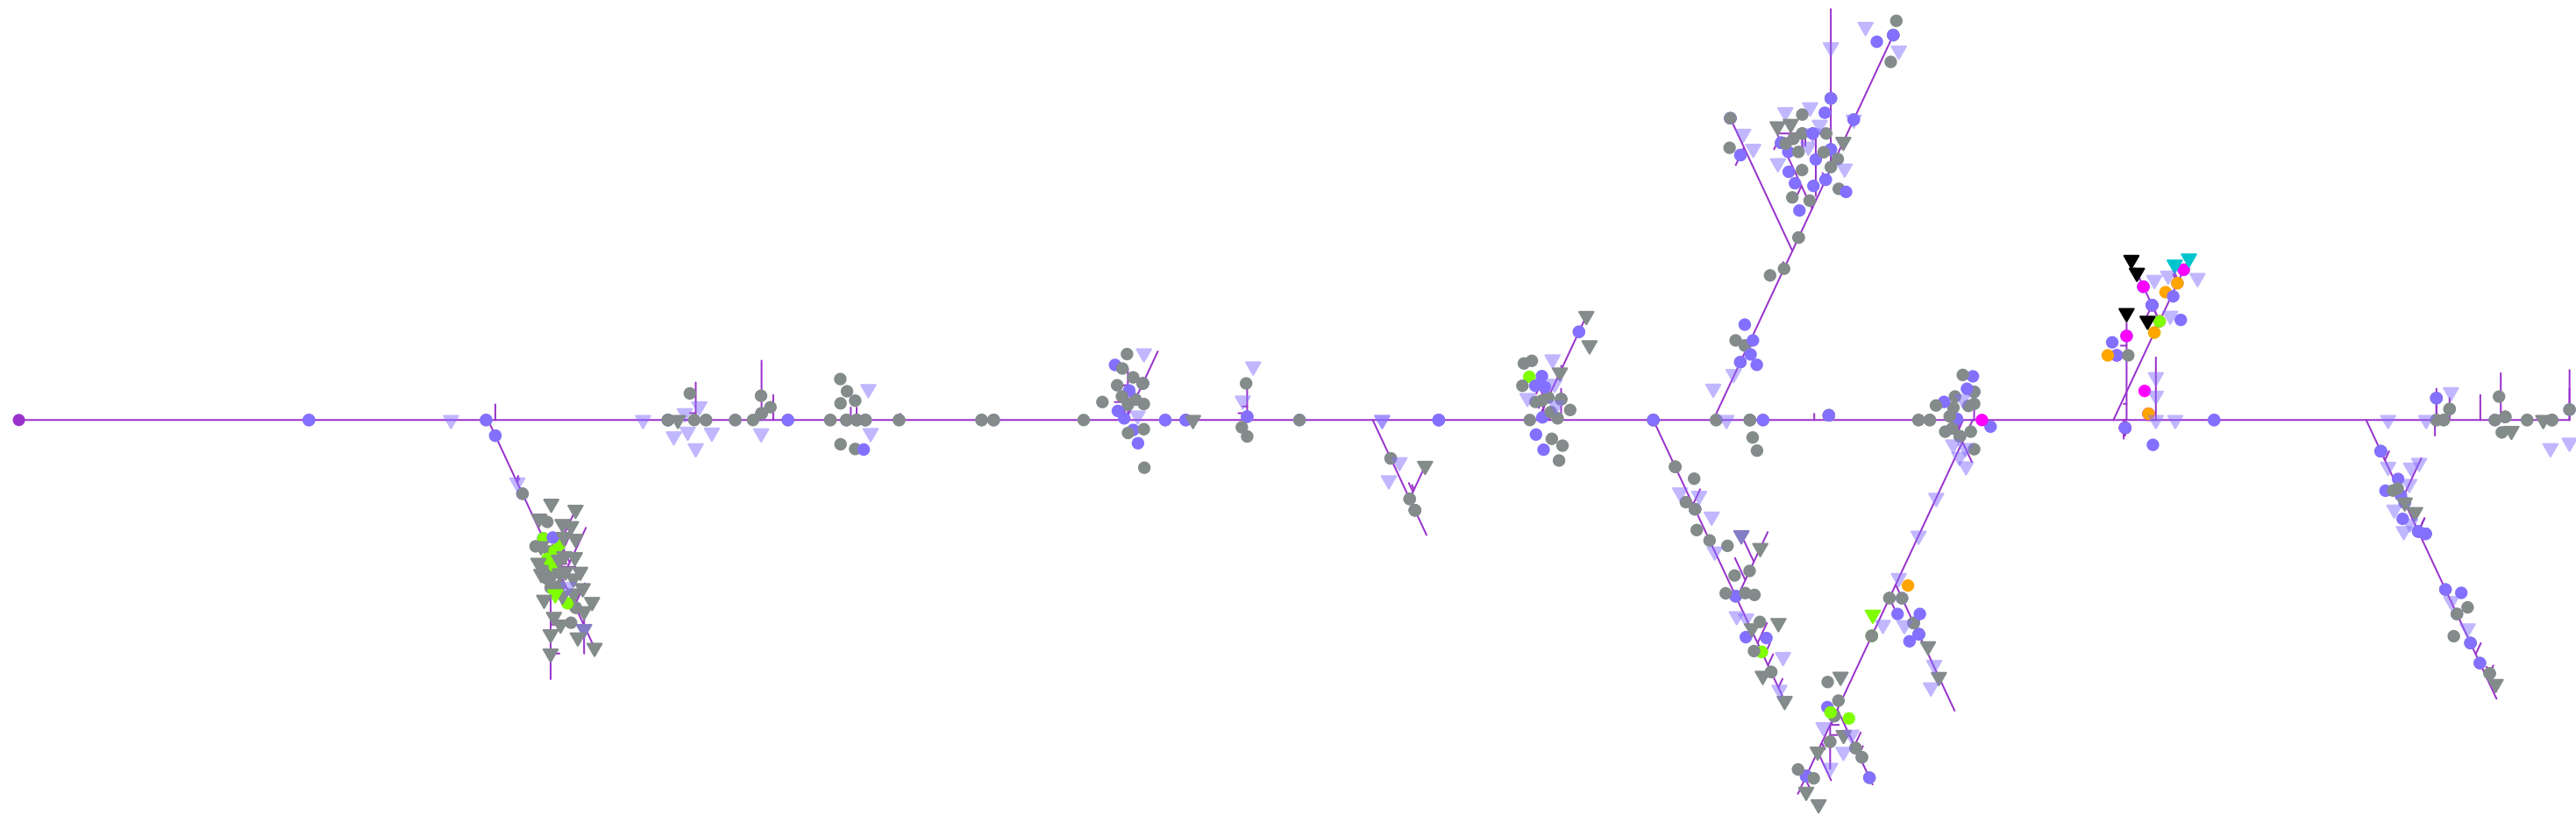

1 claw KC #12 (left)

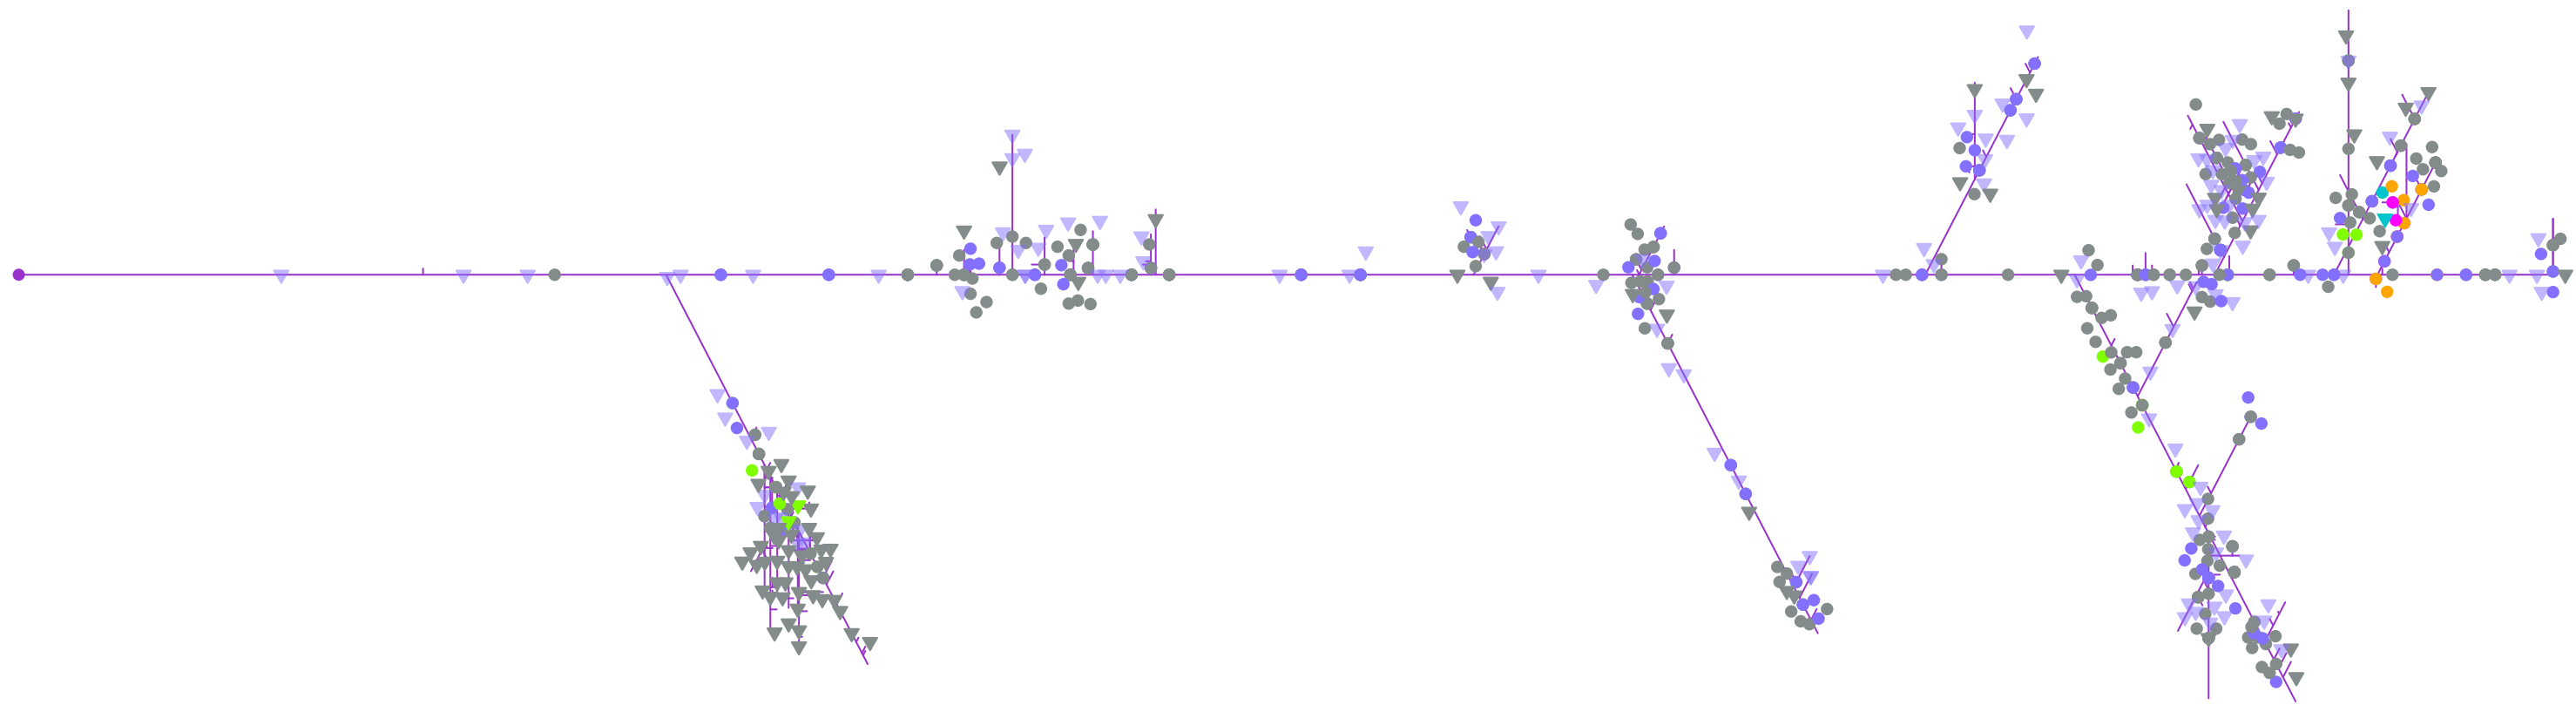

1 claw KC #13 (left)

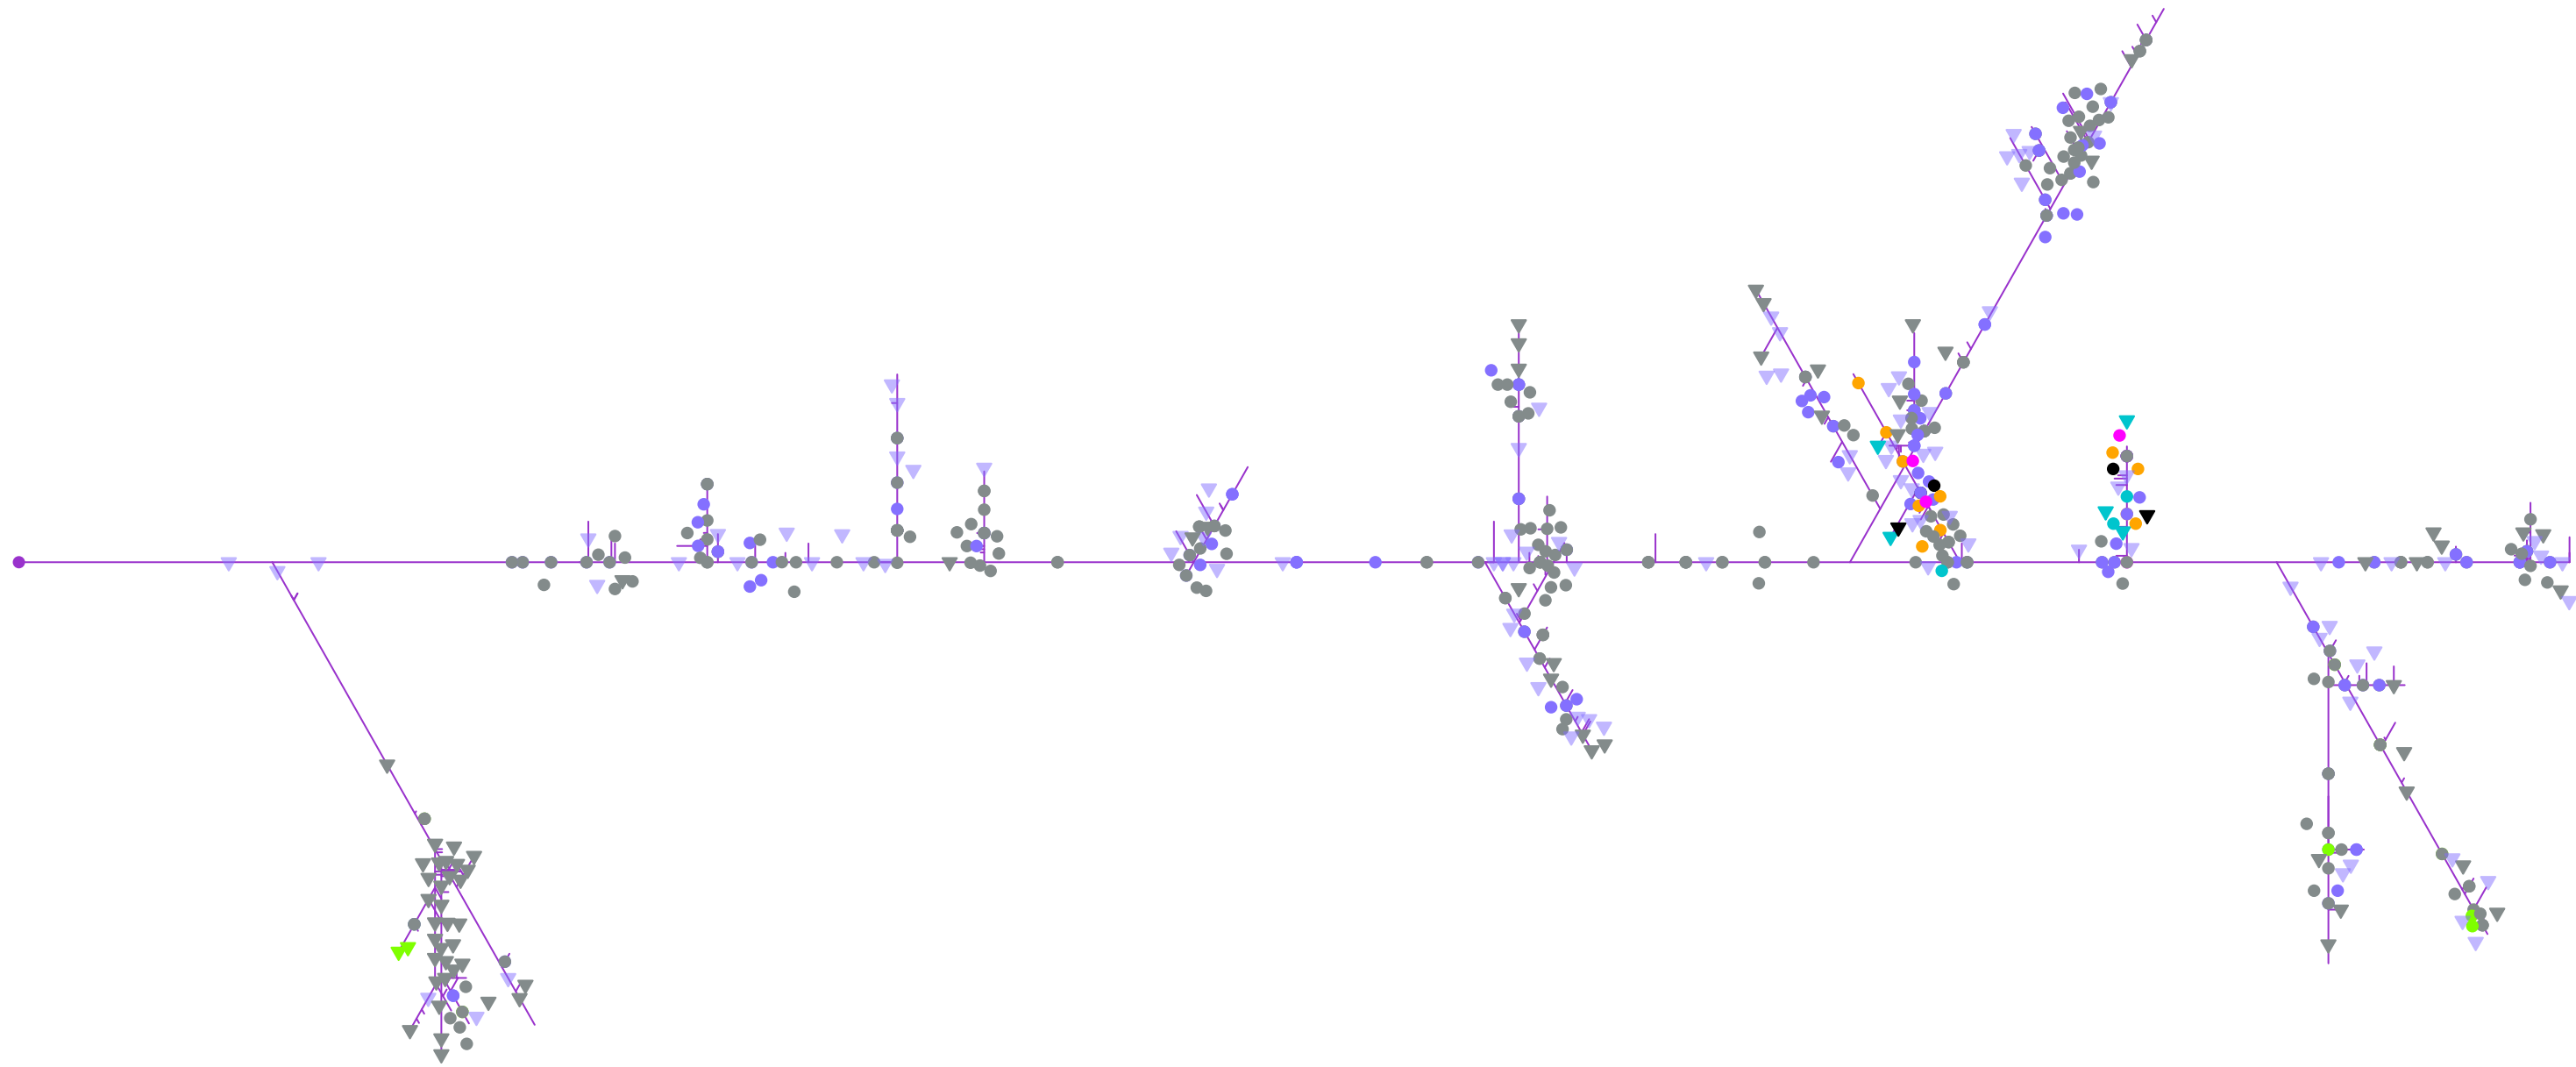

1 claw KC #14 (left)

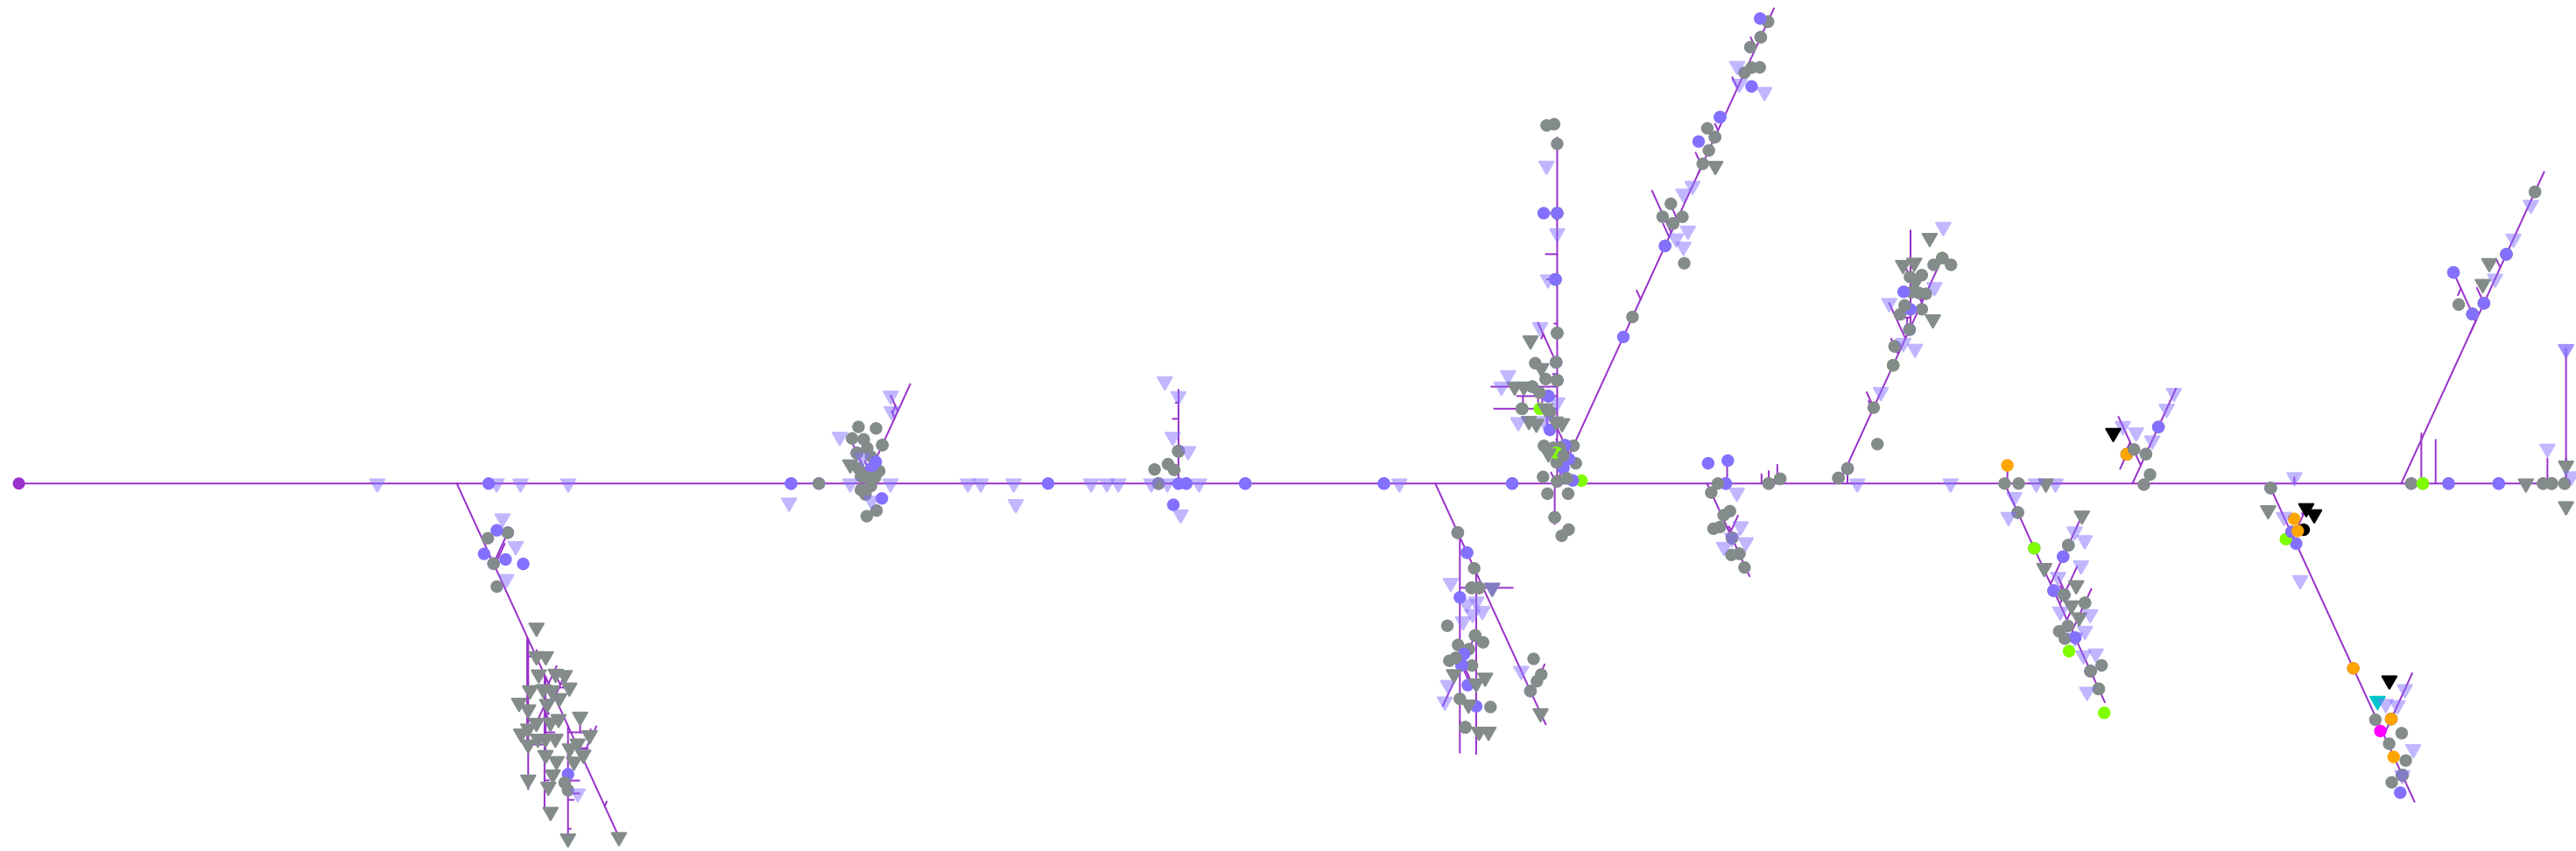

1 claw KC #15 (left)

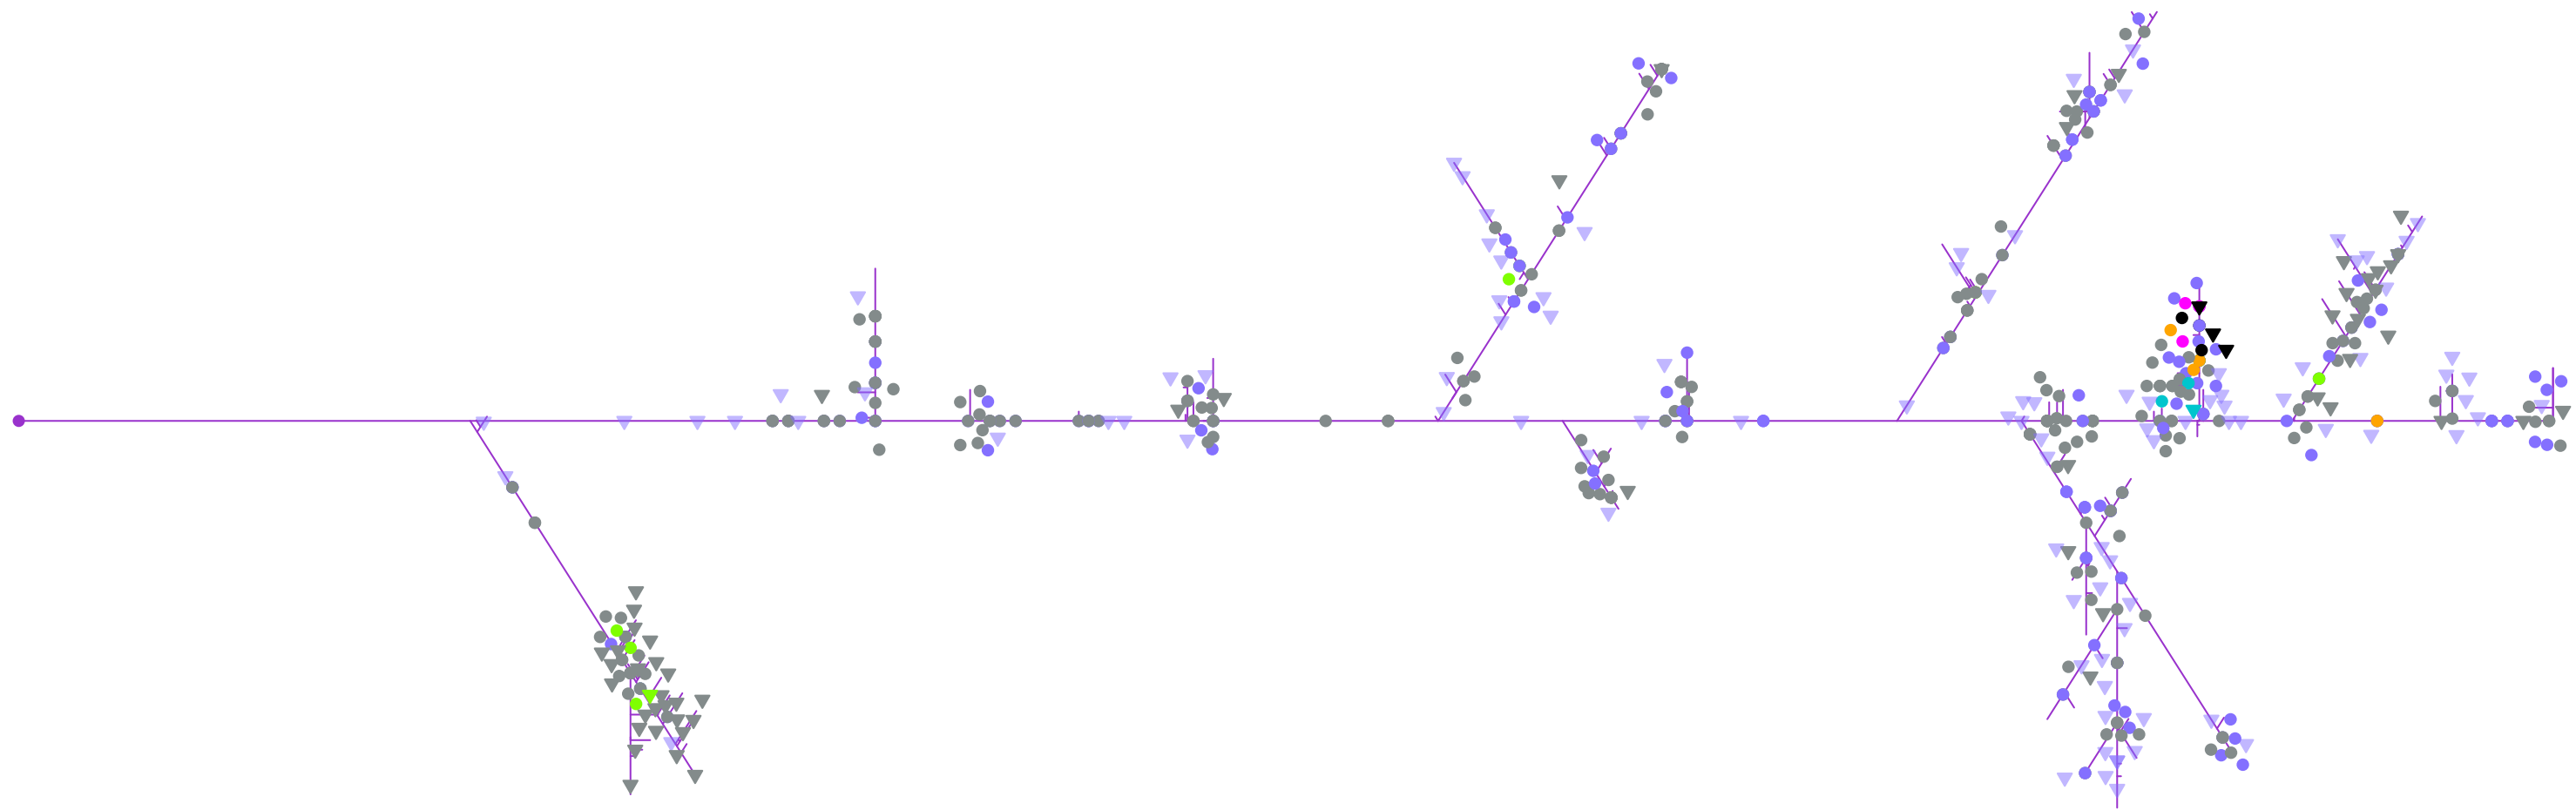



1 claw KC #16 (left)

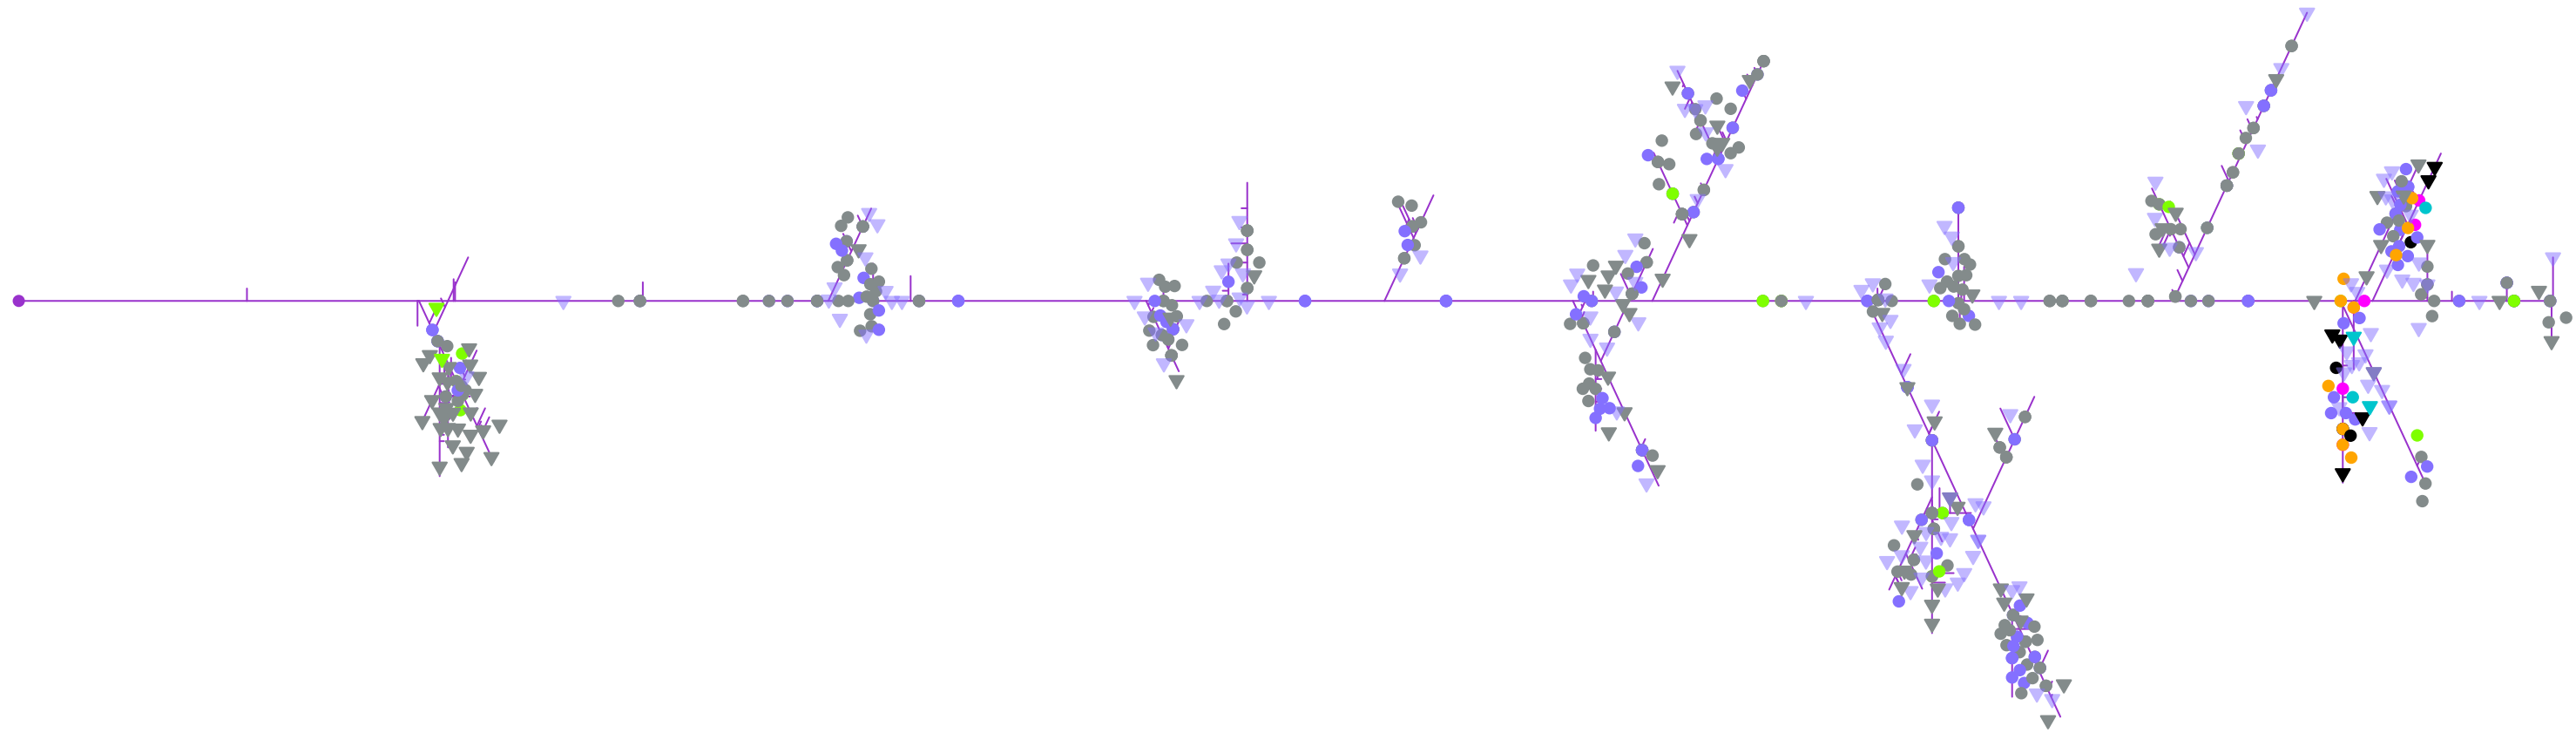

1 claw KC #17 (left)

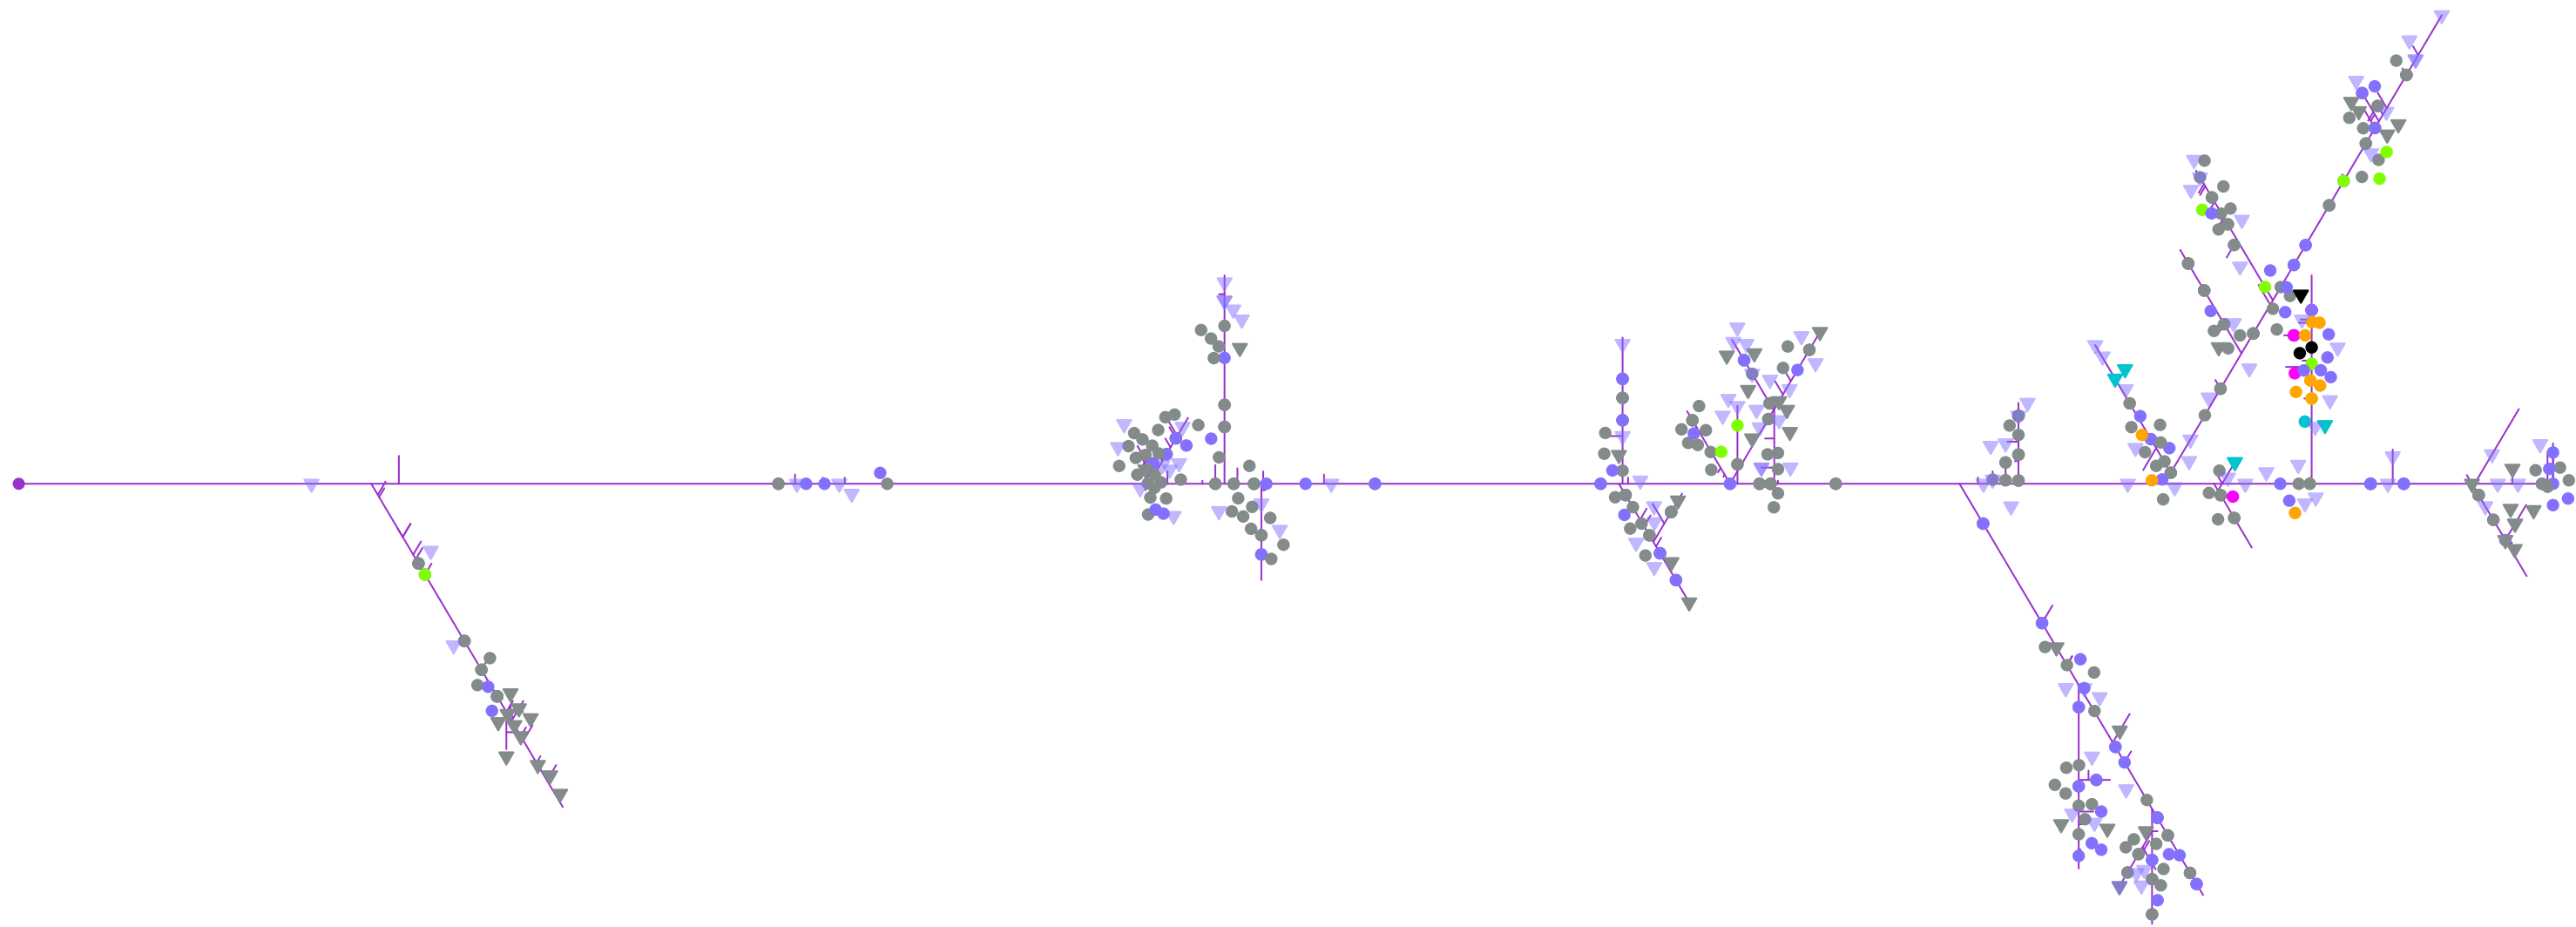

2 claw KC #1 (left)

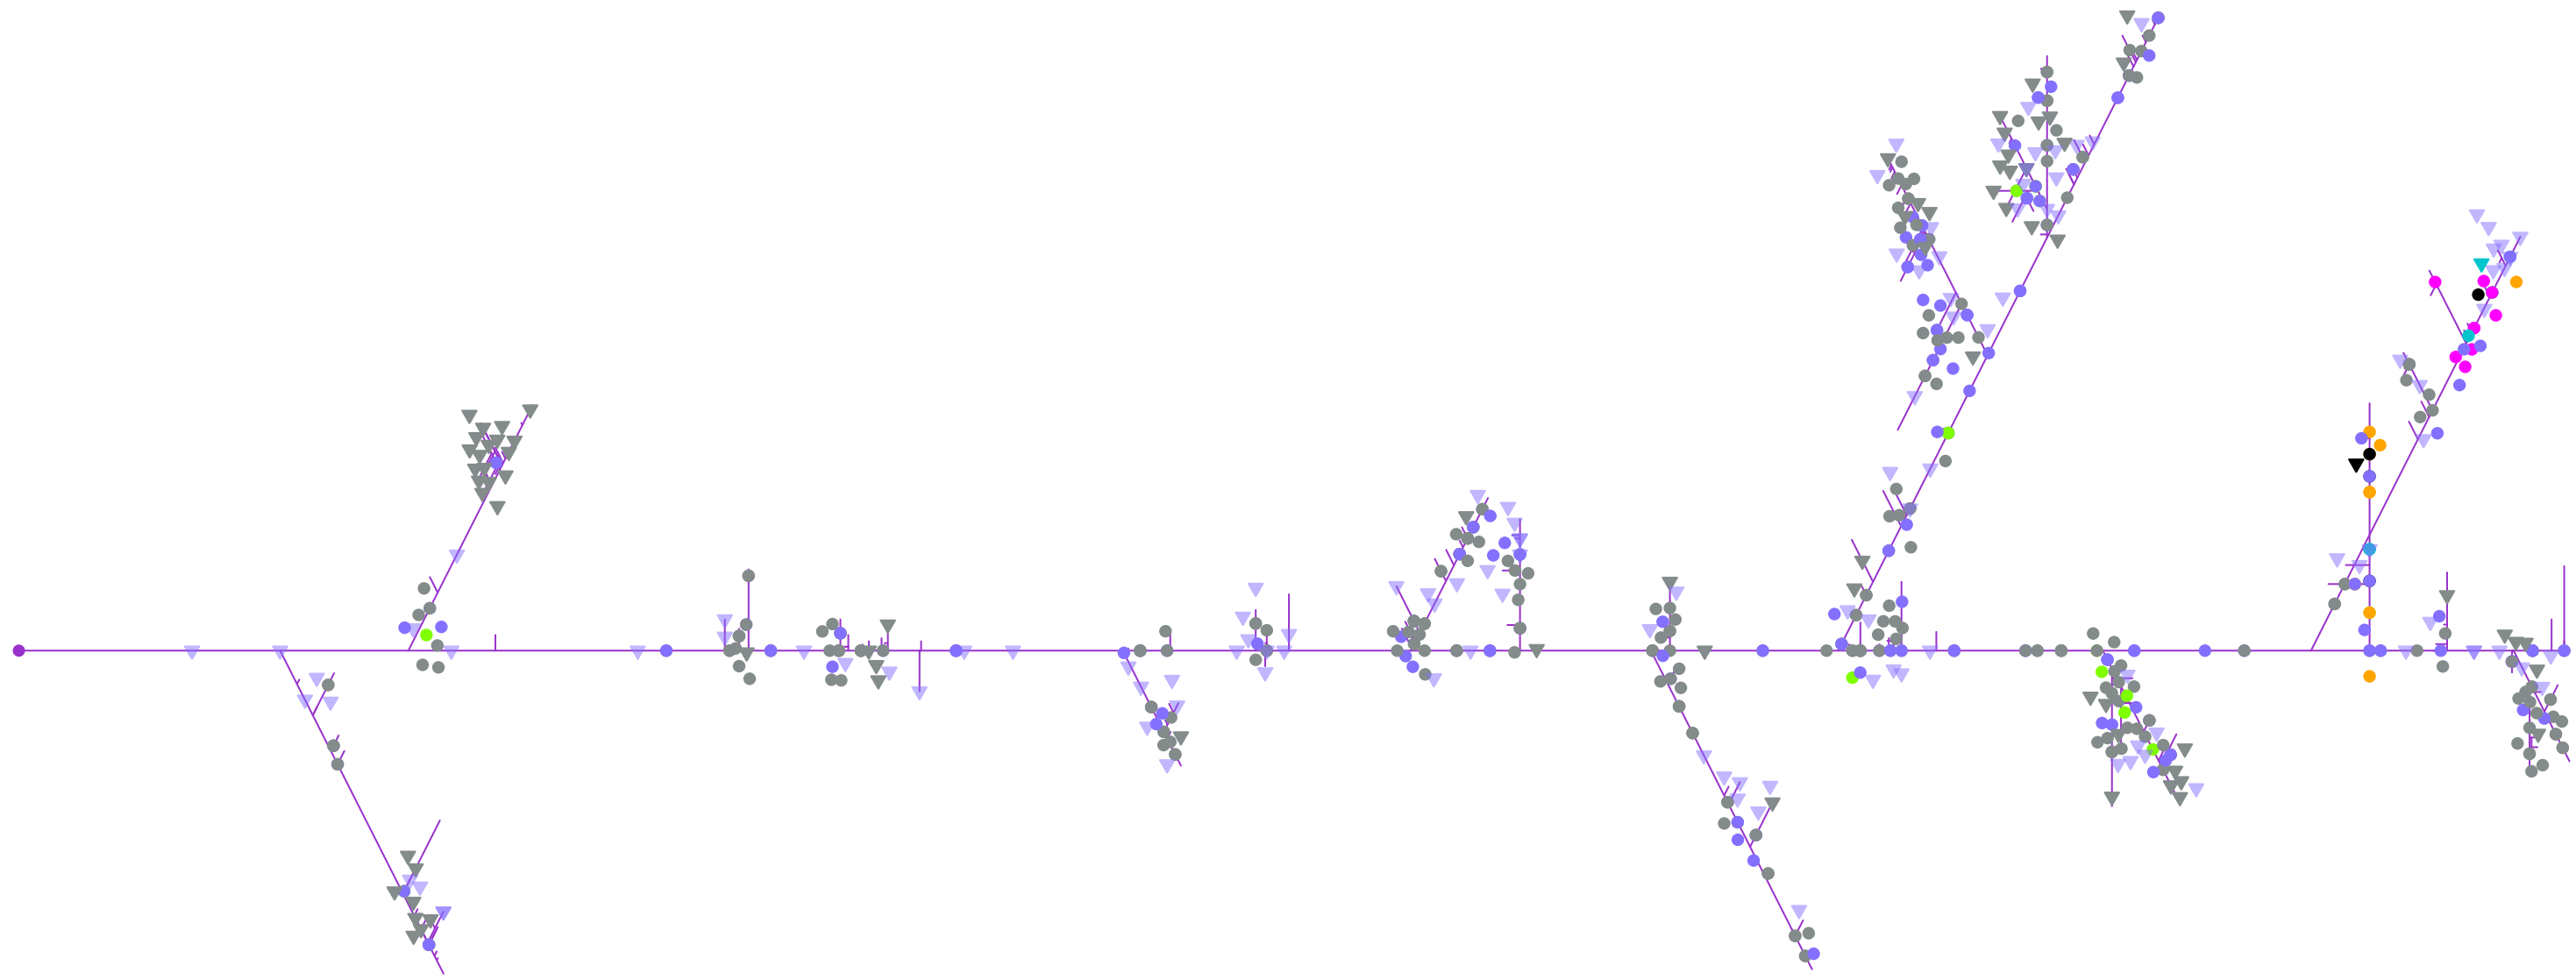

2 claw KC #2 (left)

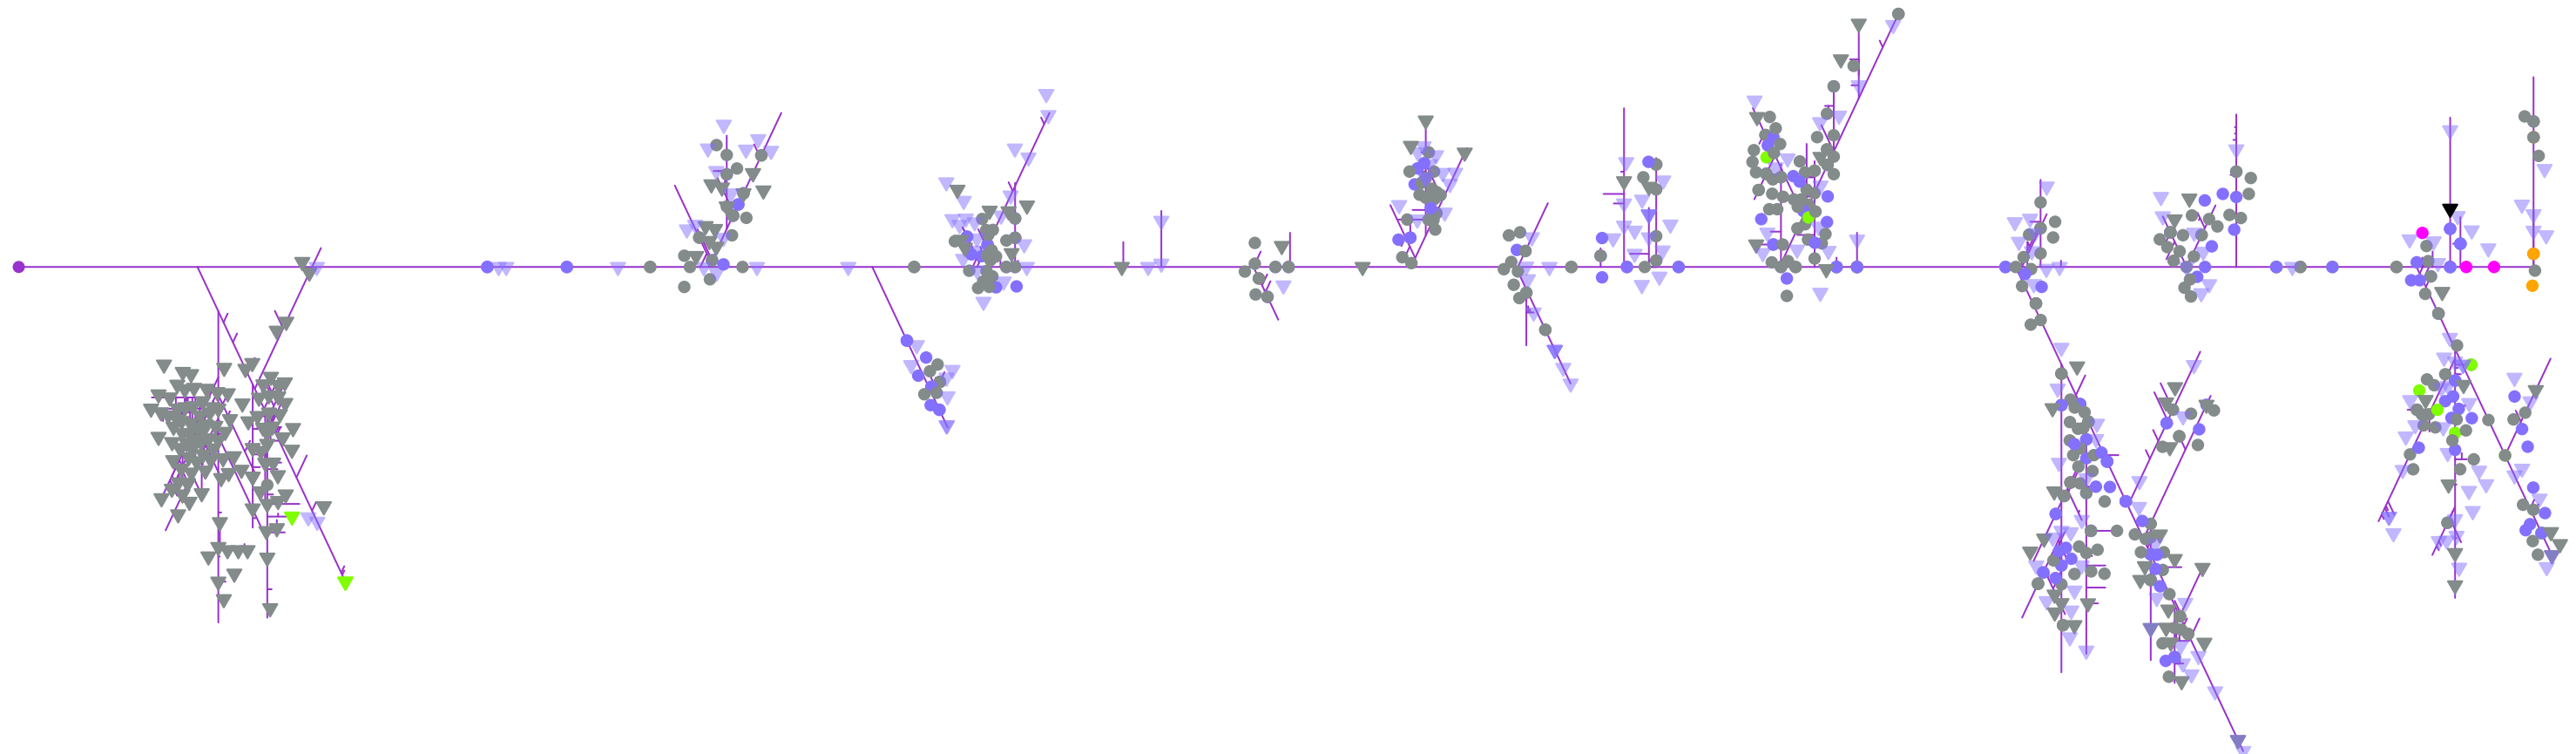

2 claw KC #3 (left)

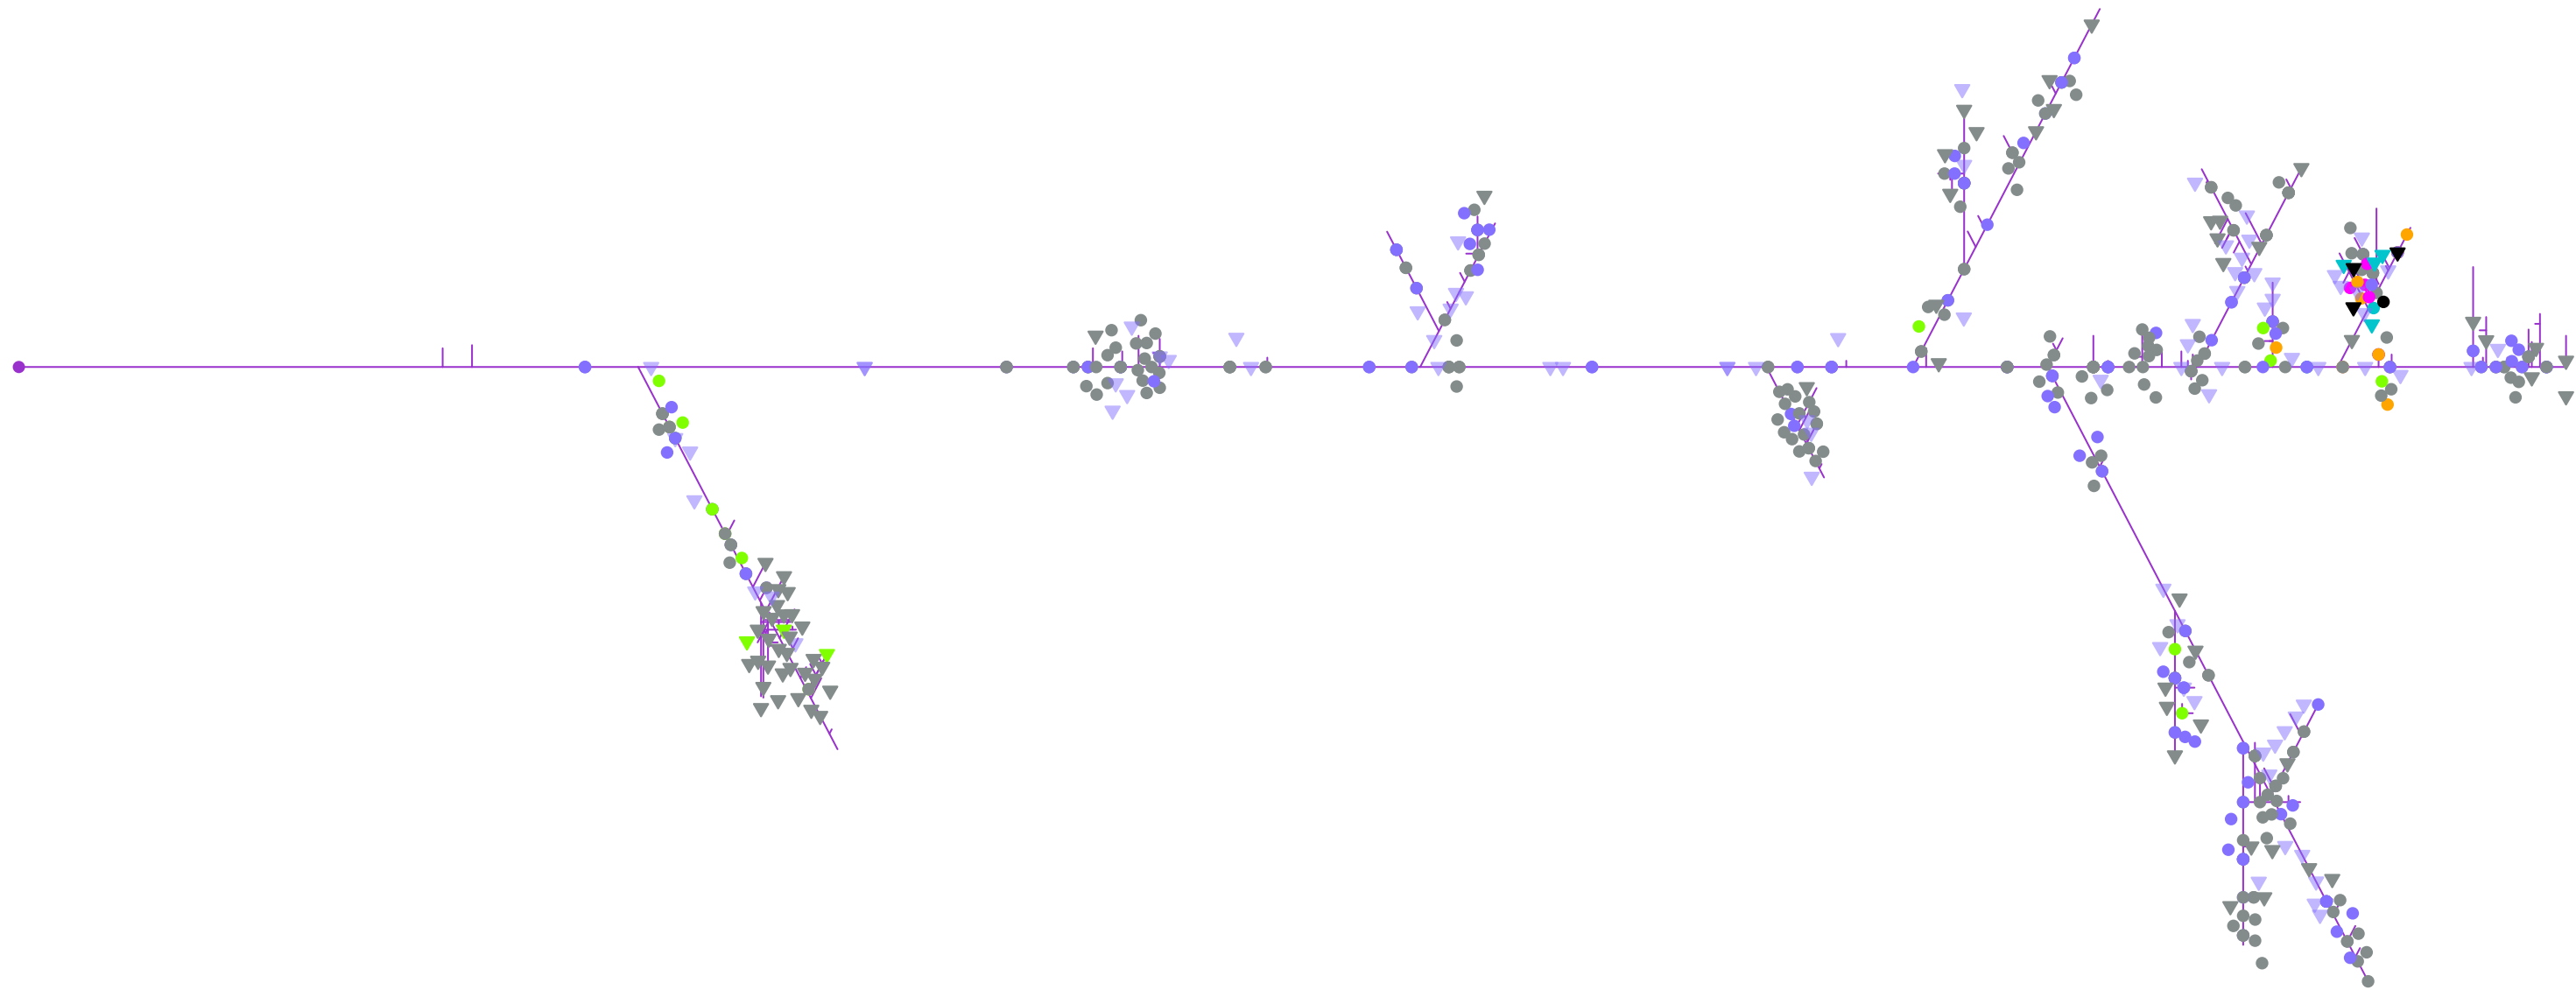

2 claw KC #4 (left)

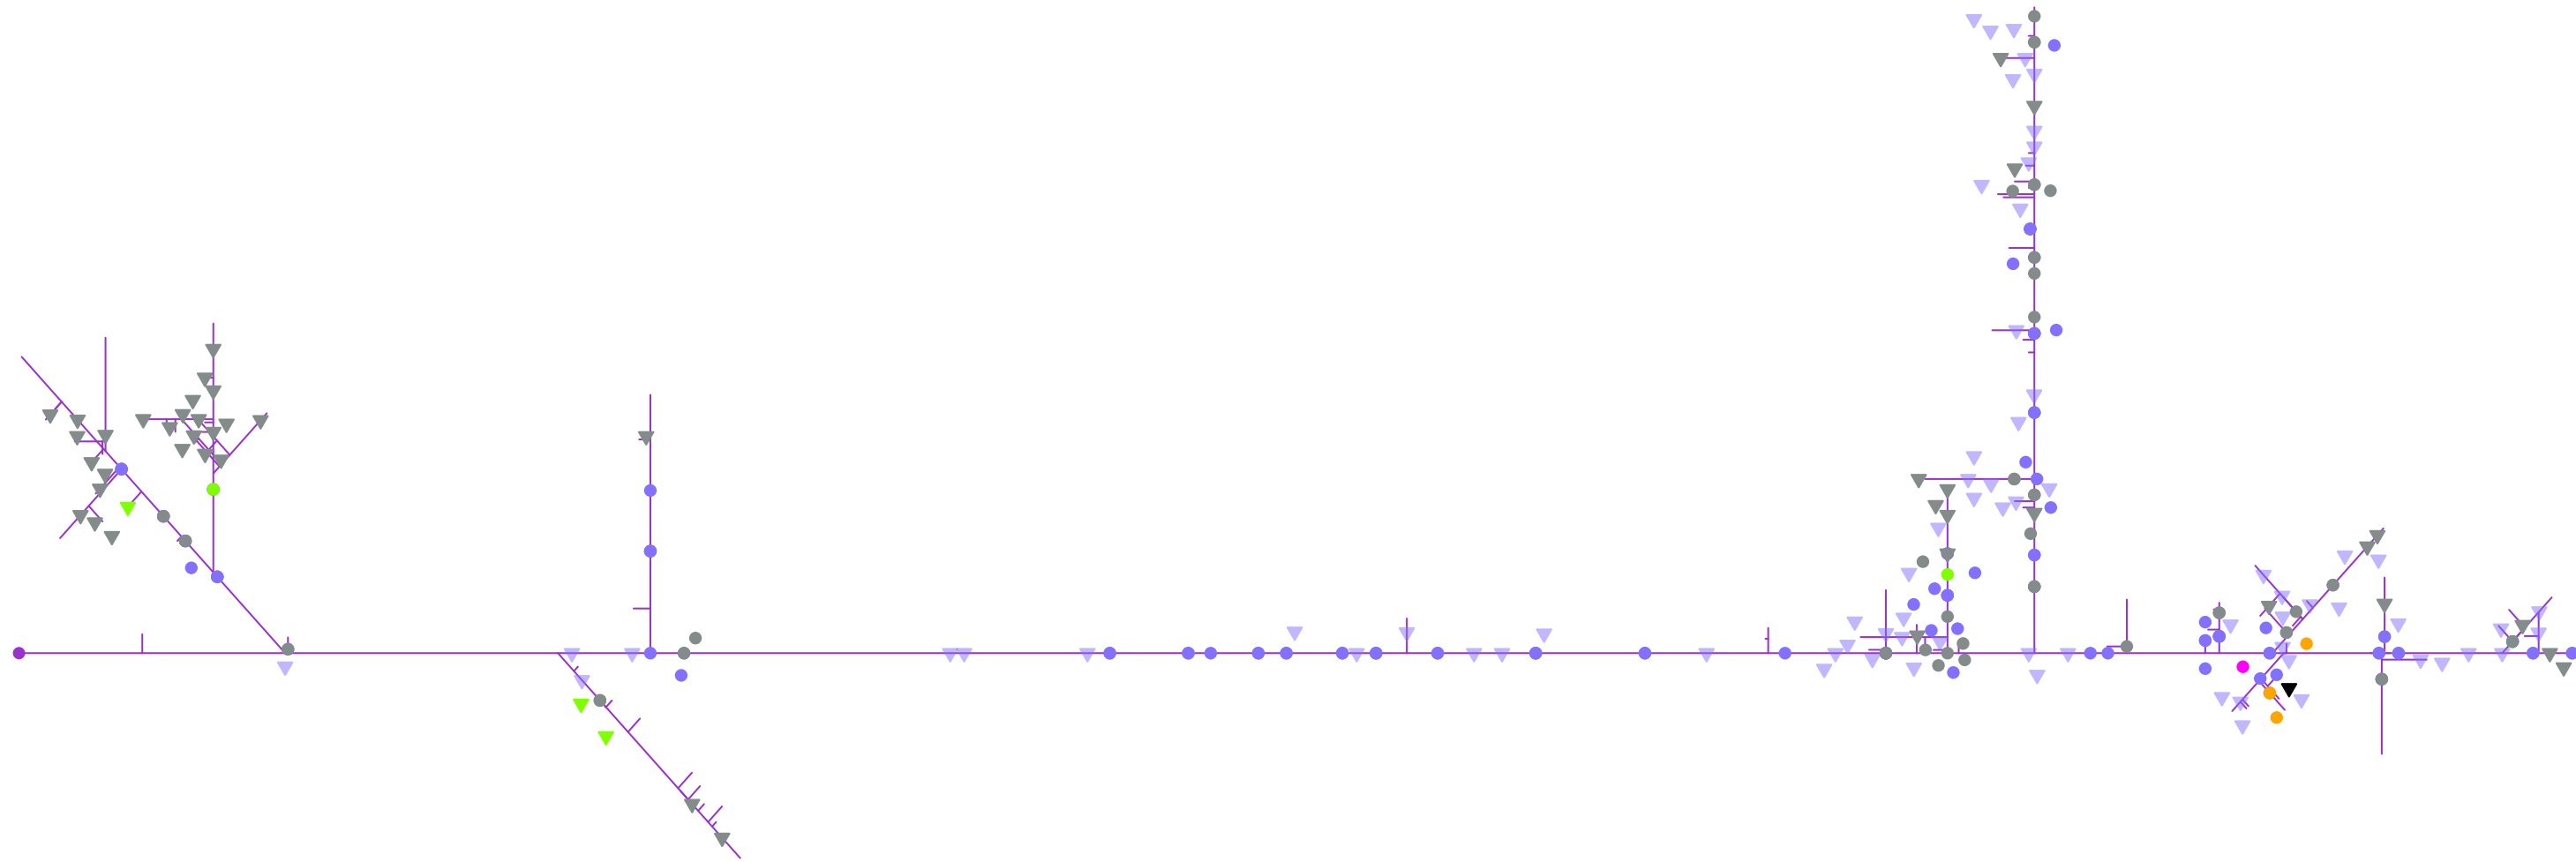

2 claw KC #5 (left)

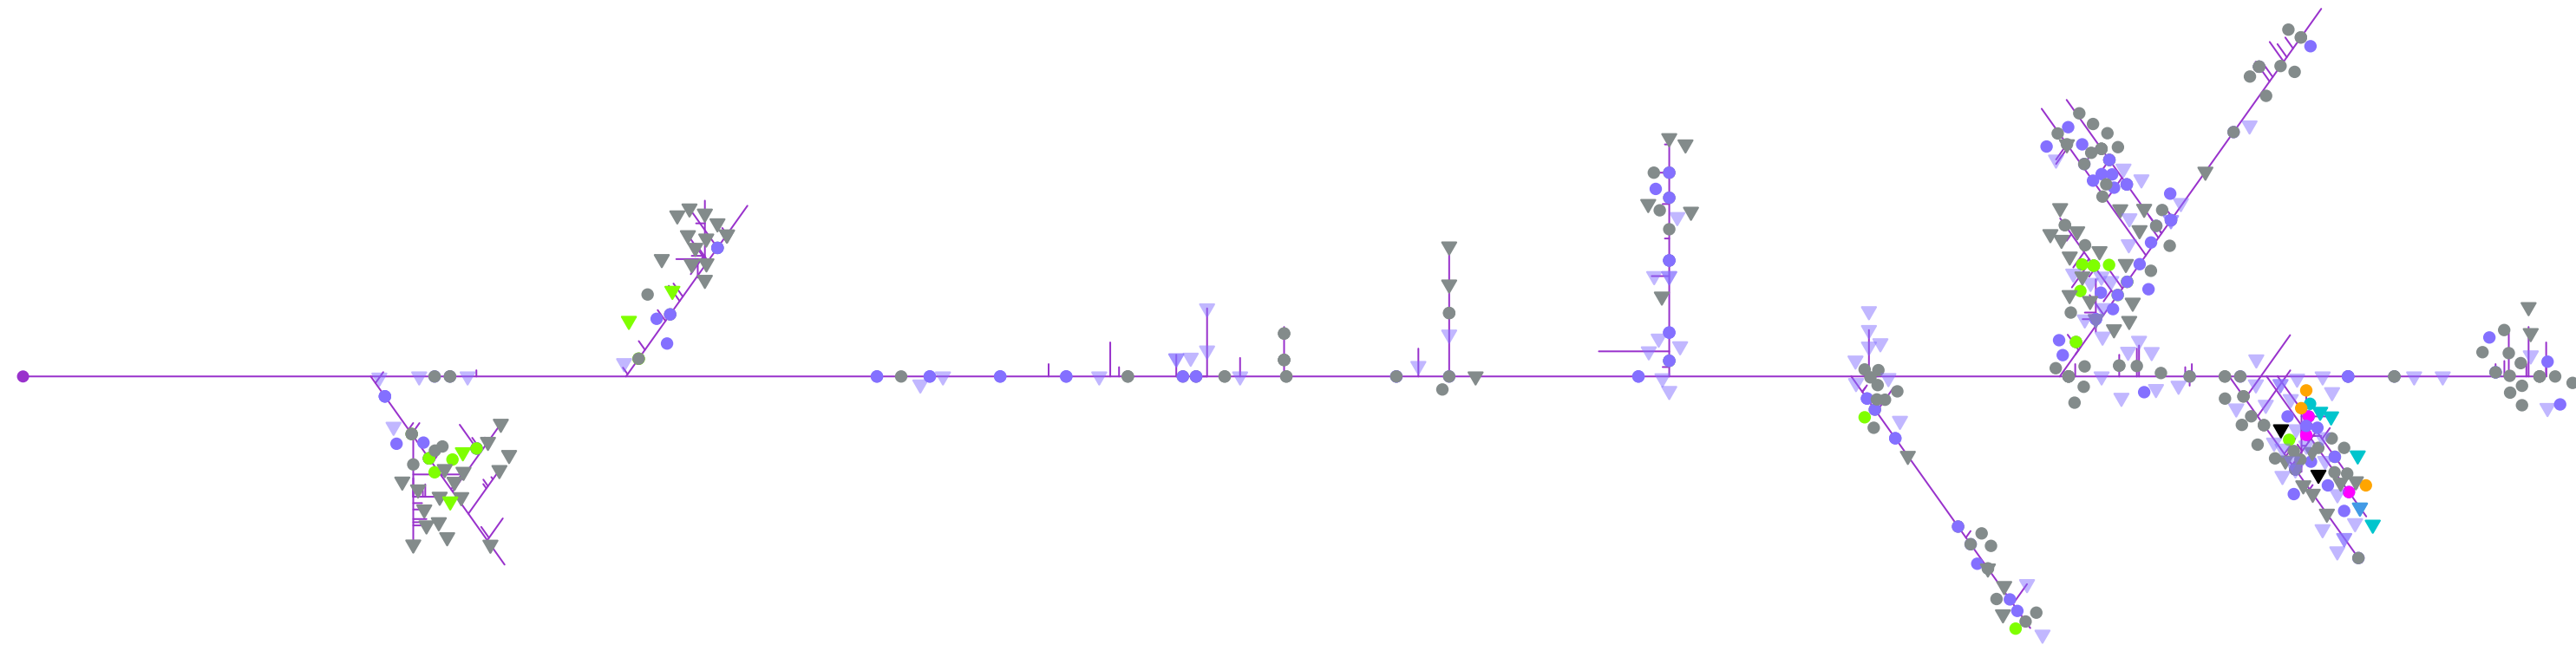

2 claw KC #6 (left)

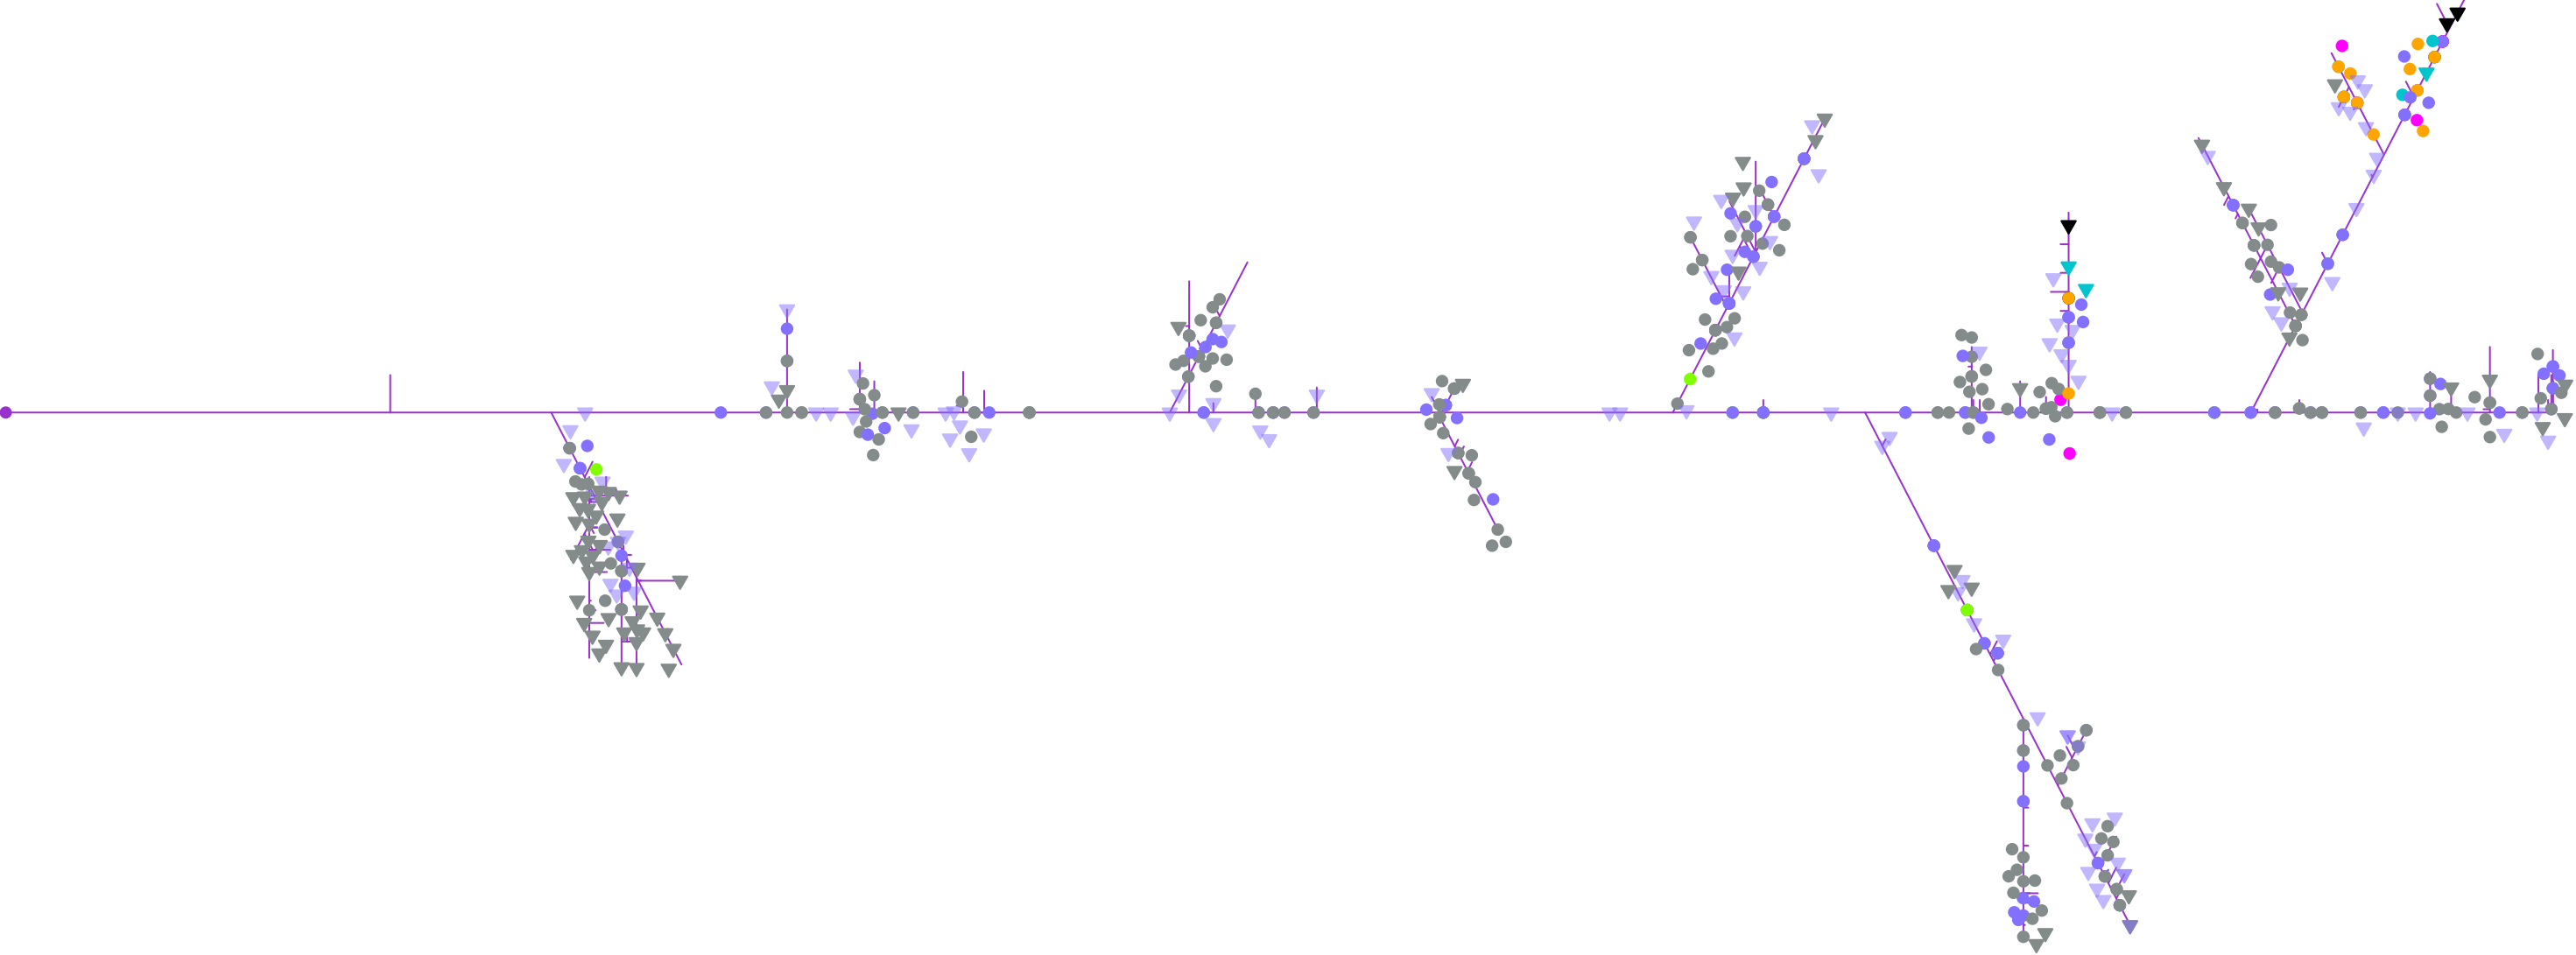



2 claw KC #7 (left)

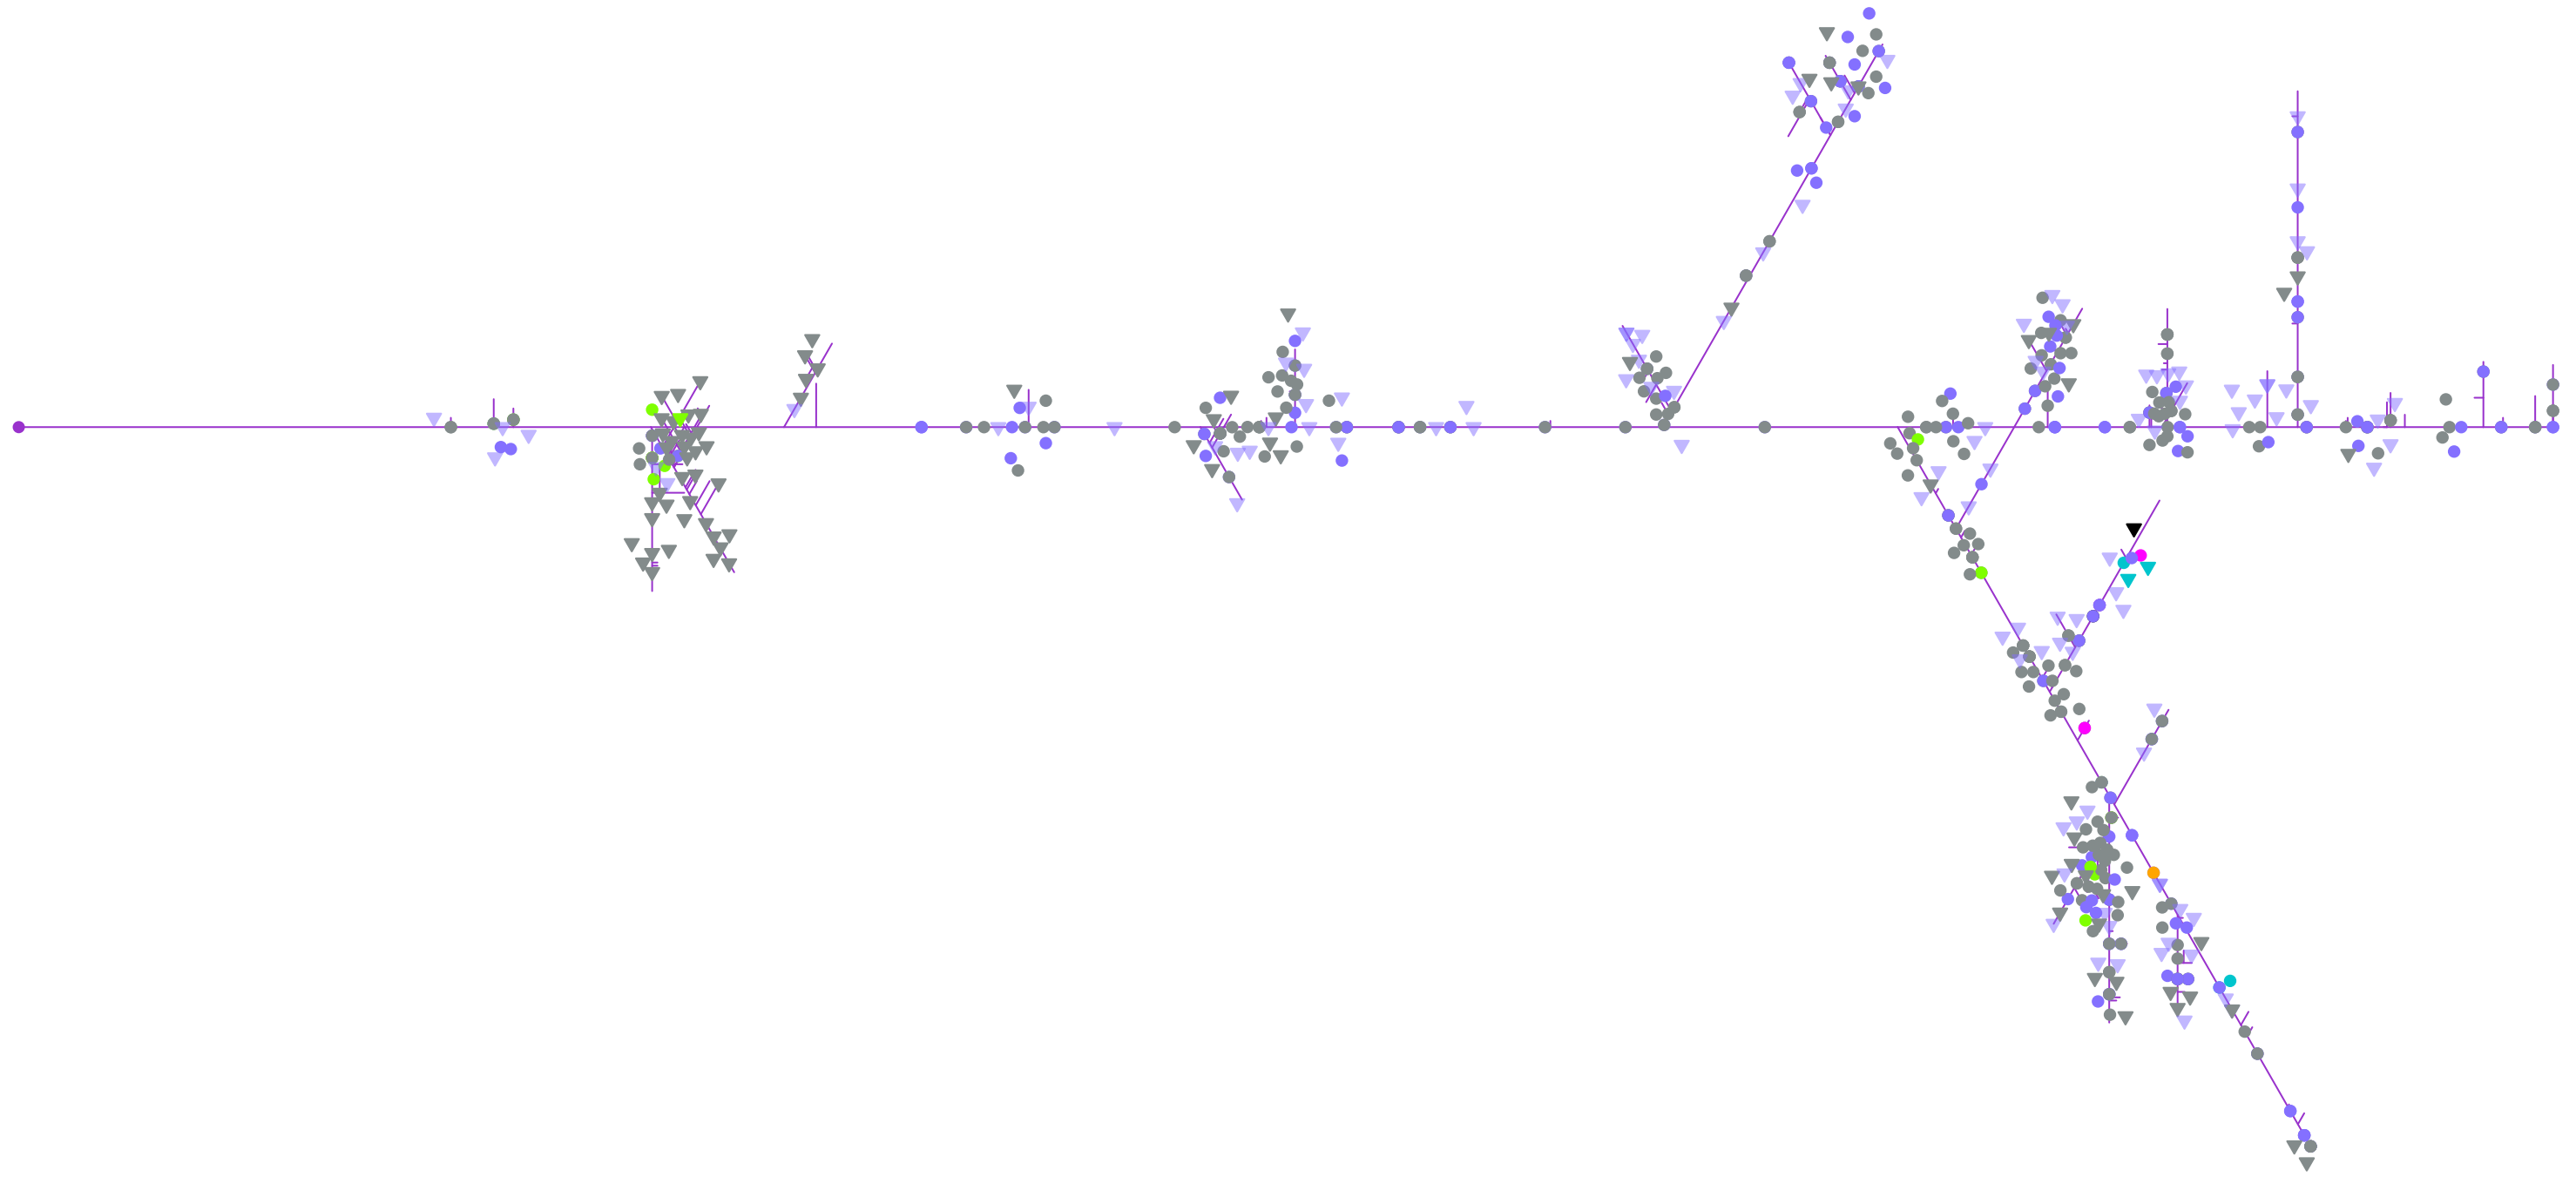

2 claw KC #8 (left)

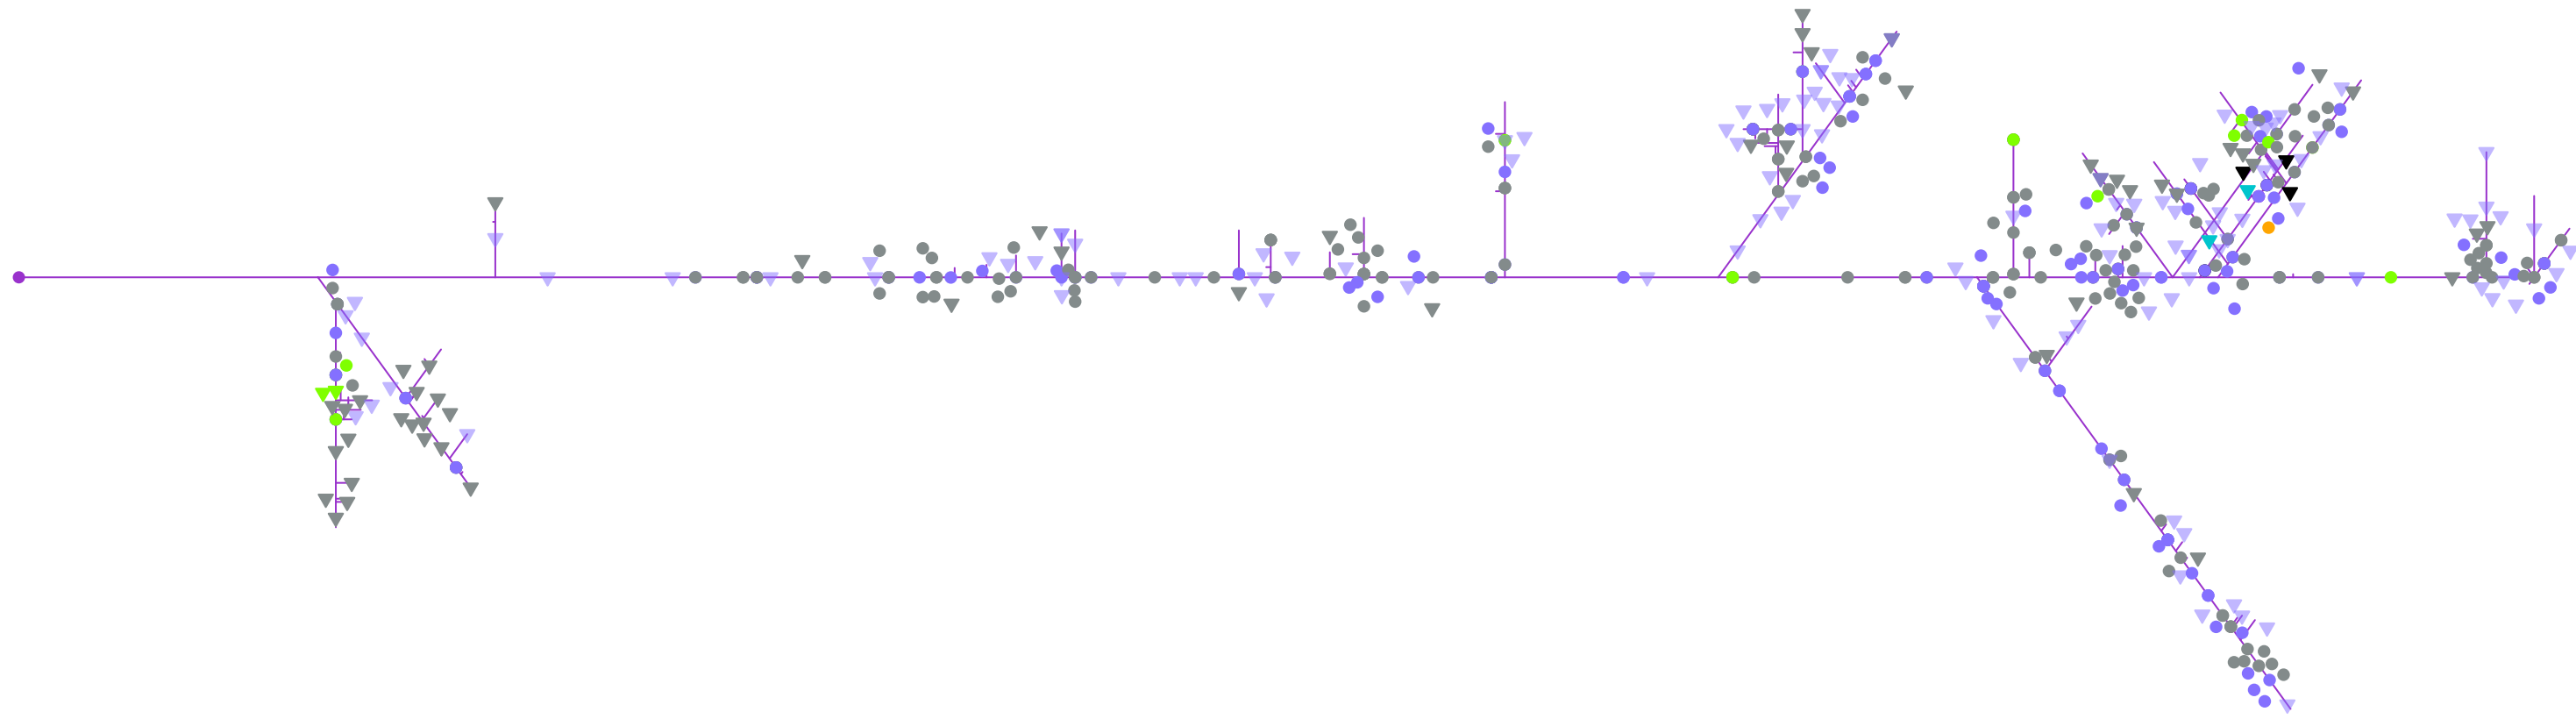

2 claw KC #9 (left)

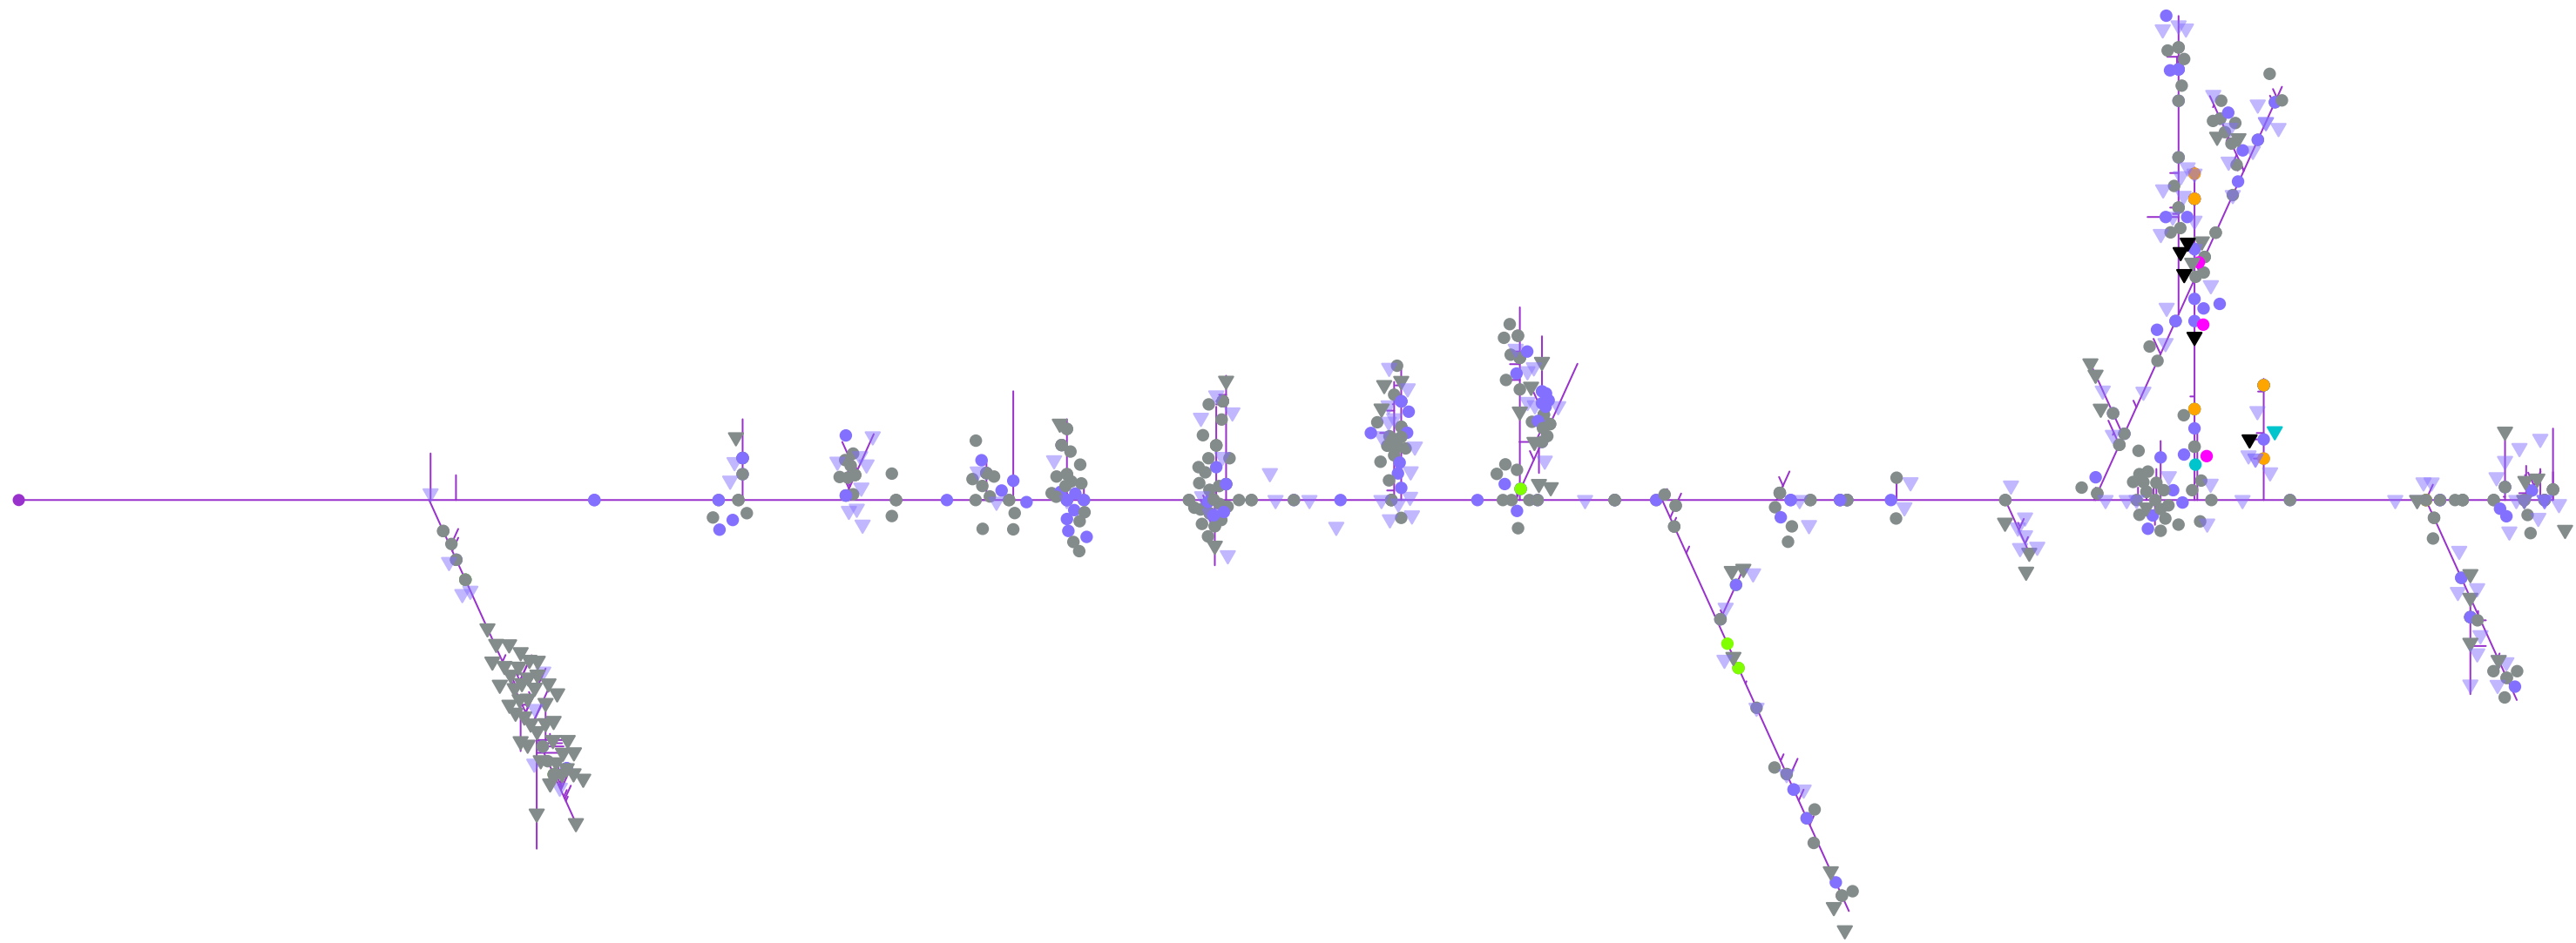

2 claw KC #10 (left)

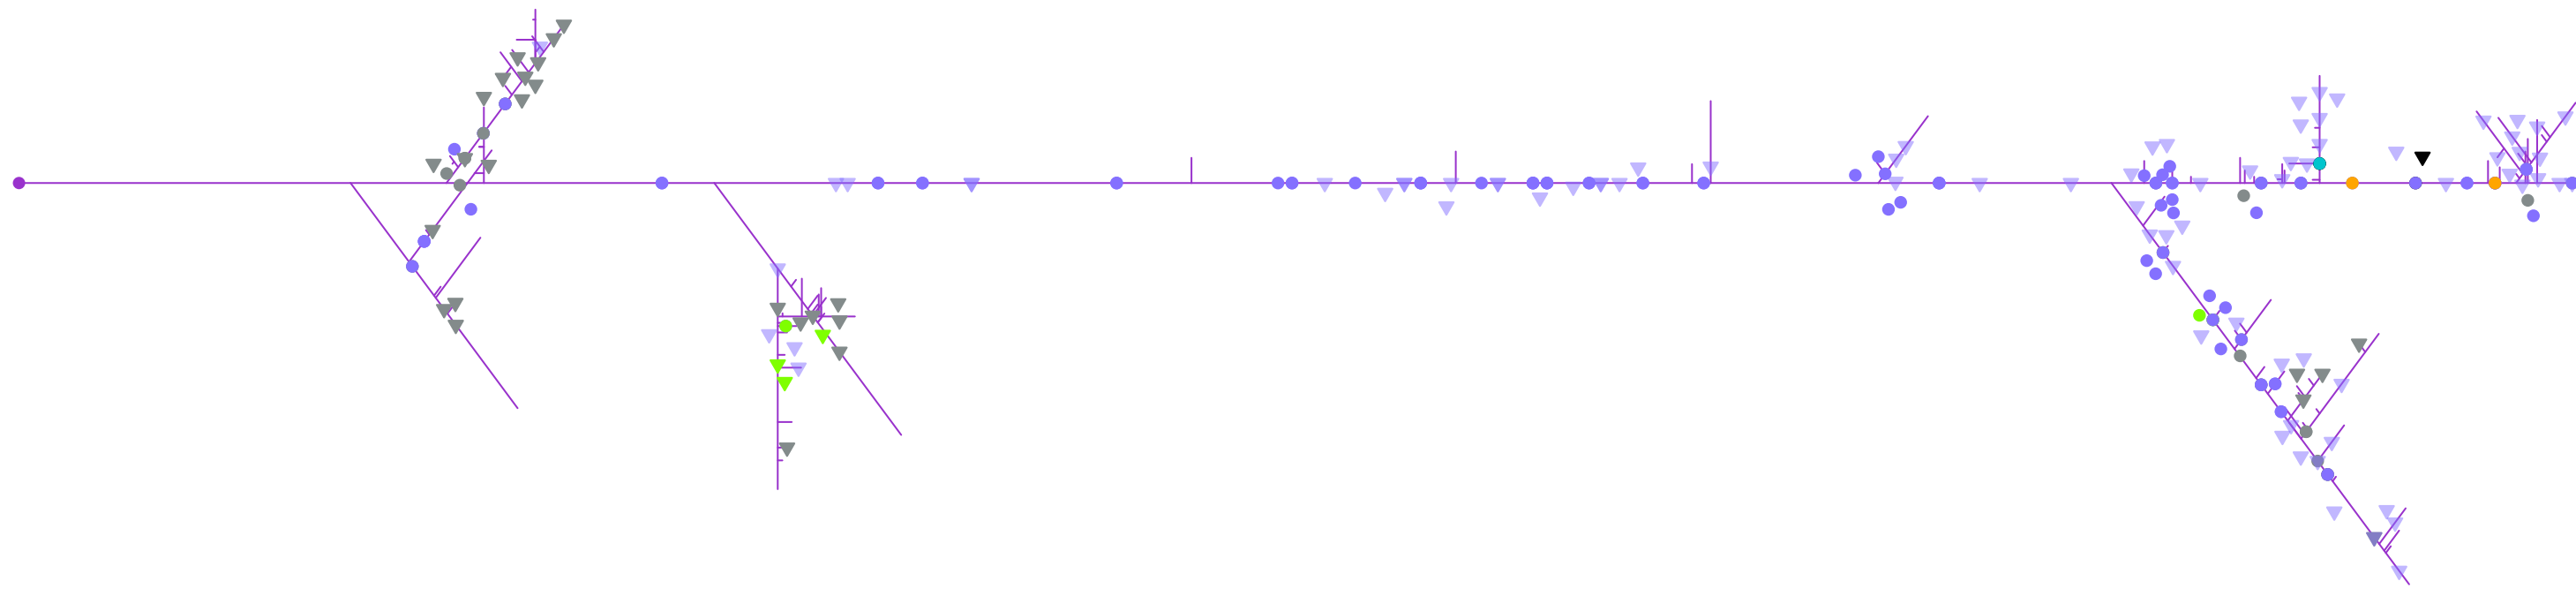

3 claw KC #1 (left)

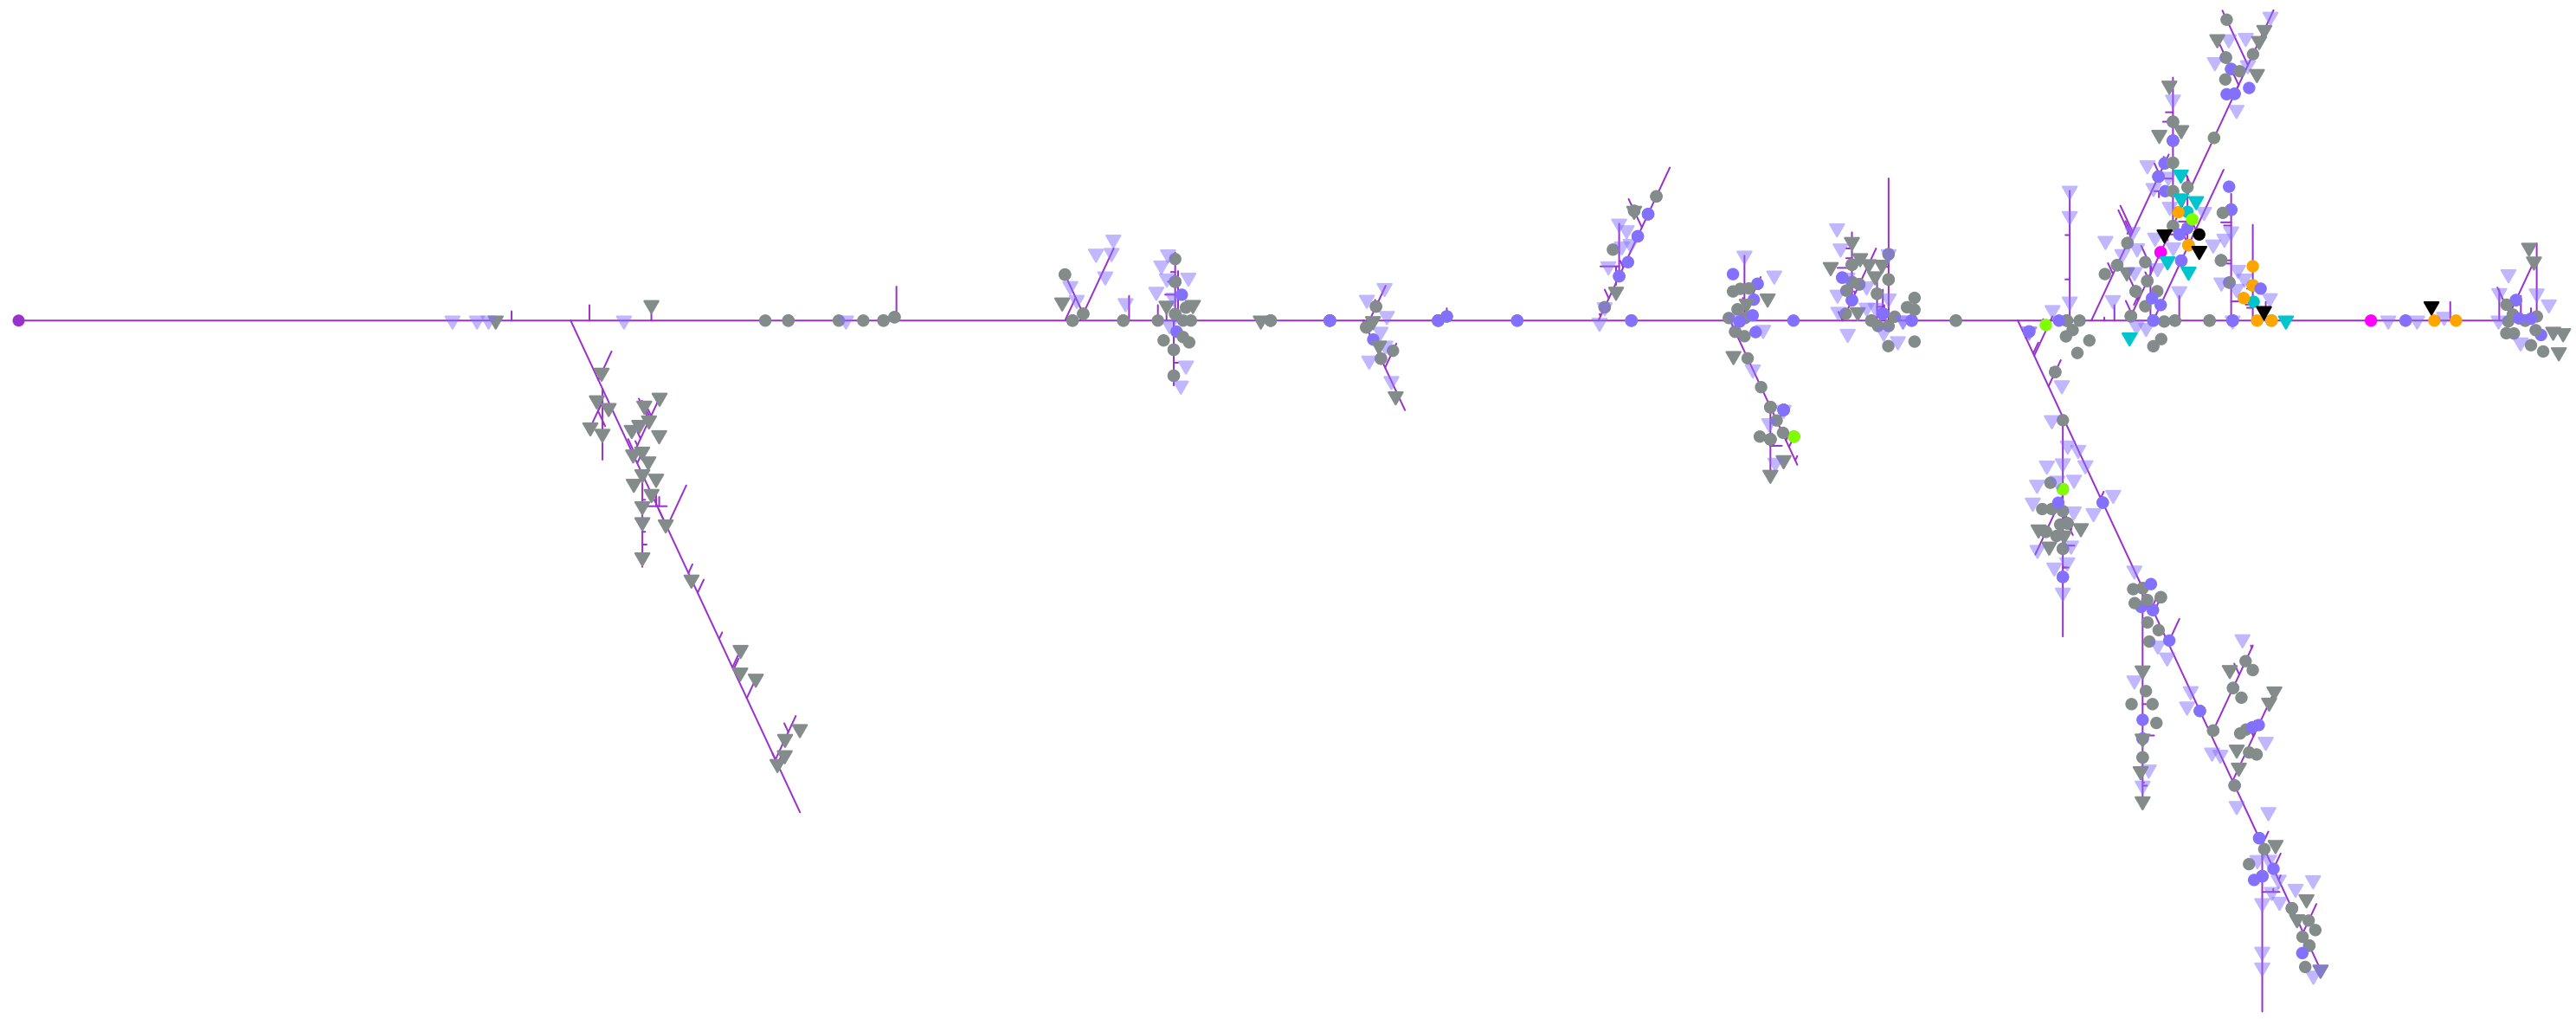

3 claw KC #2 (left)

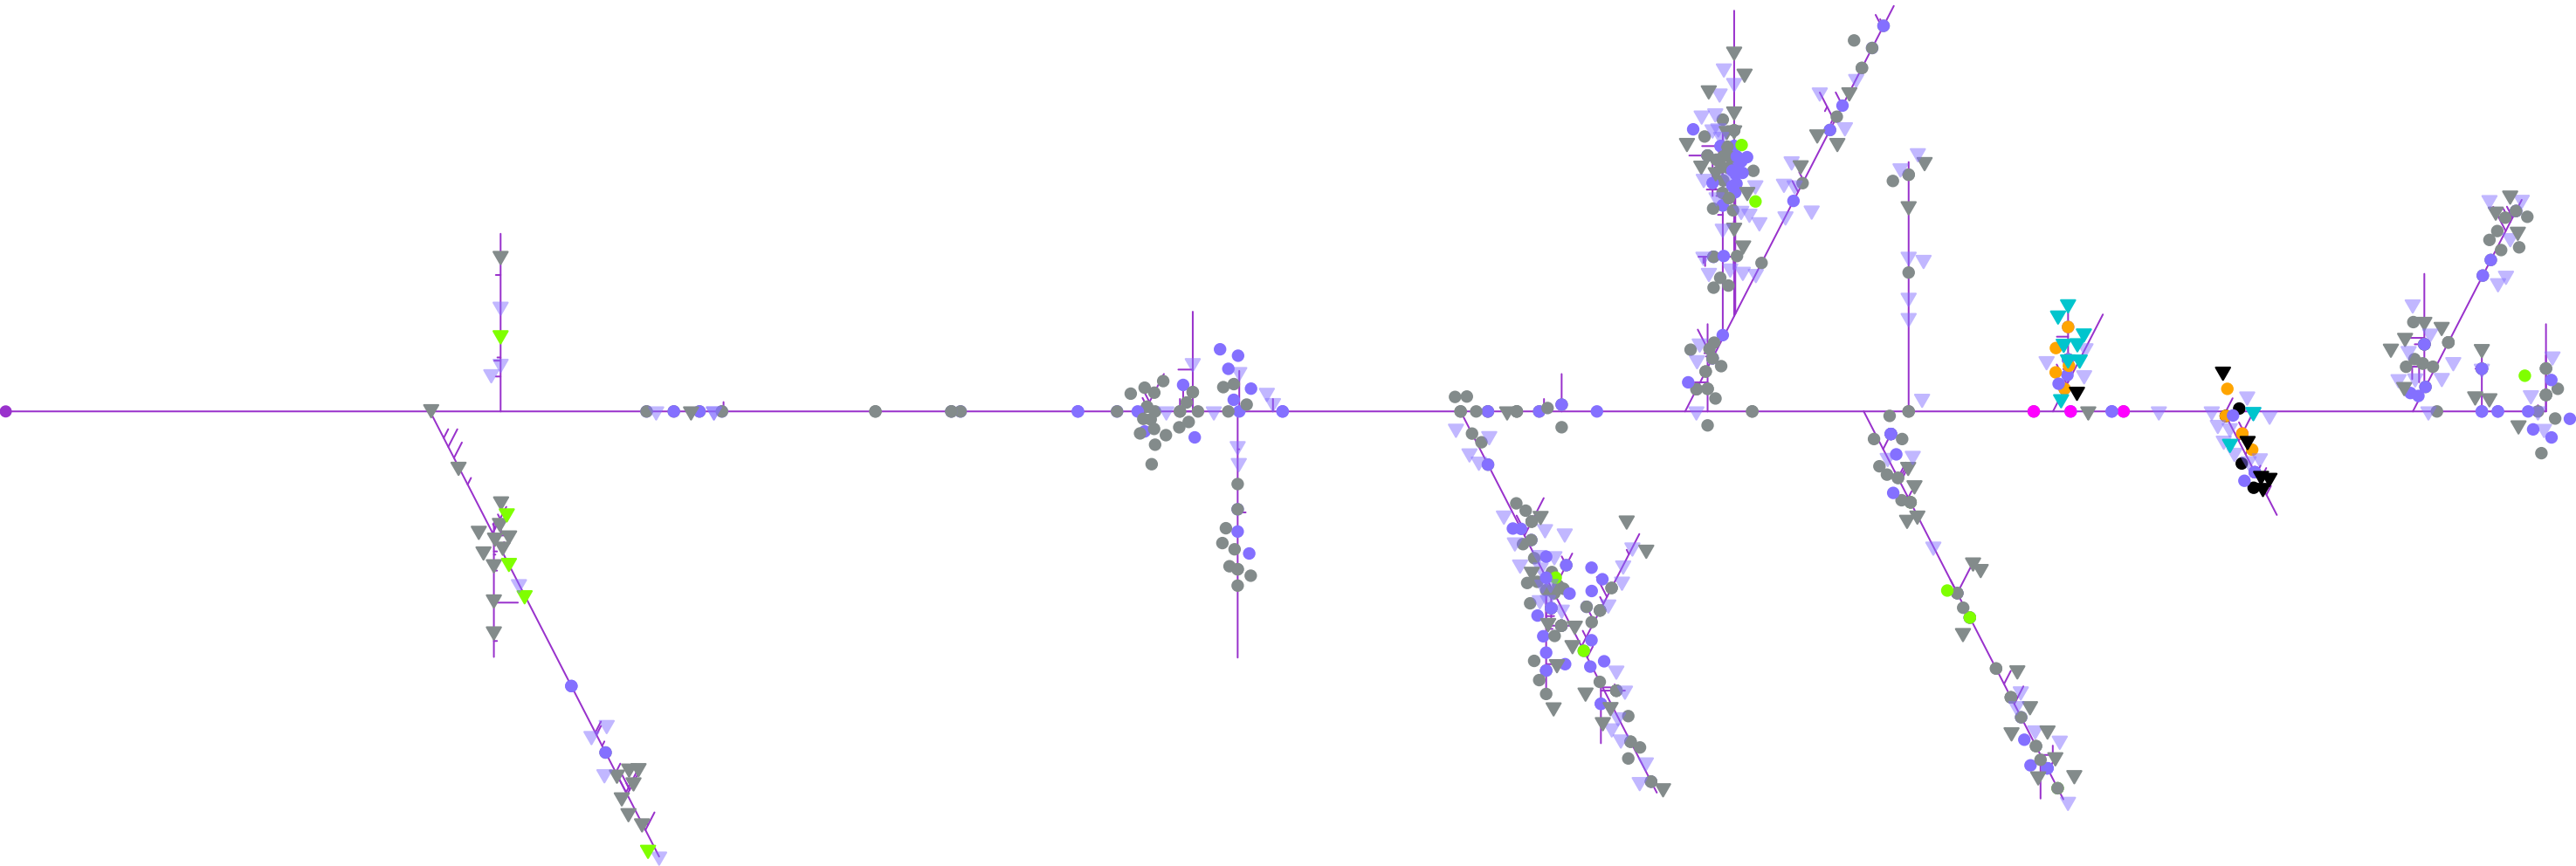

3 claw KC #3 (left)

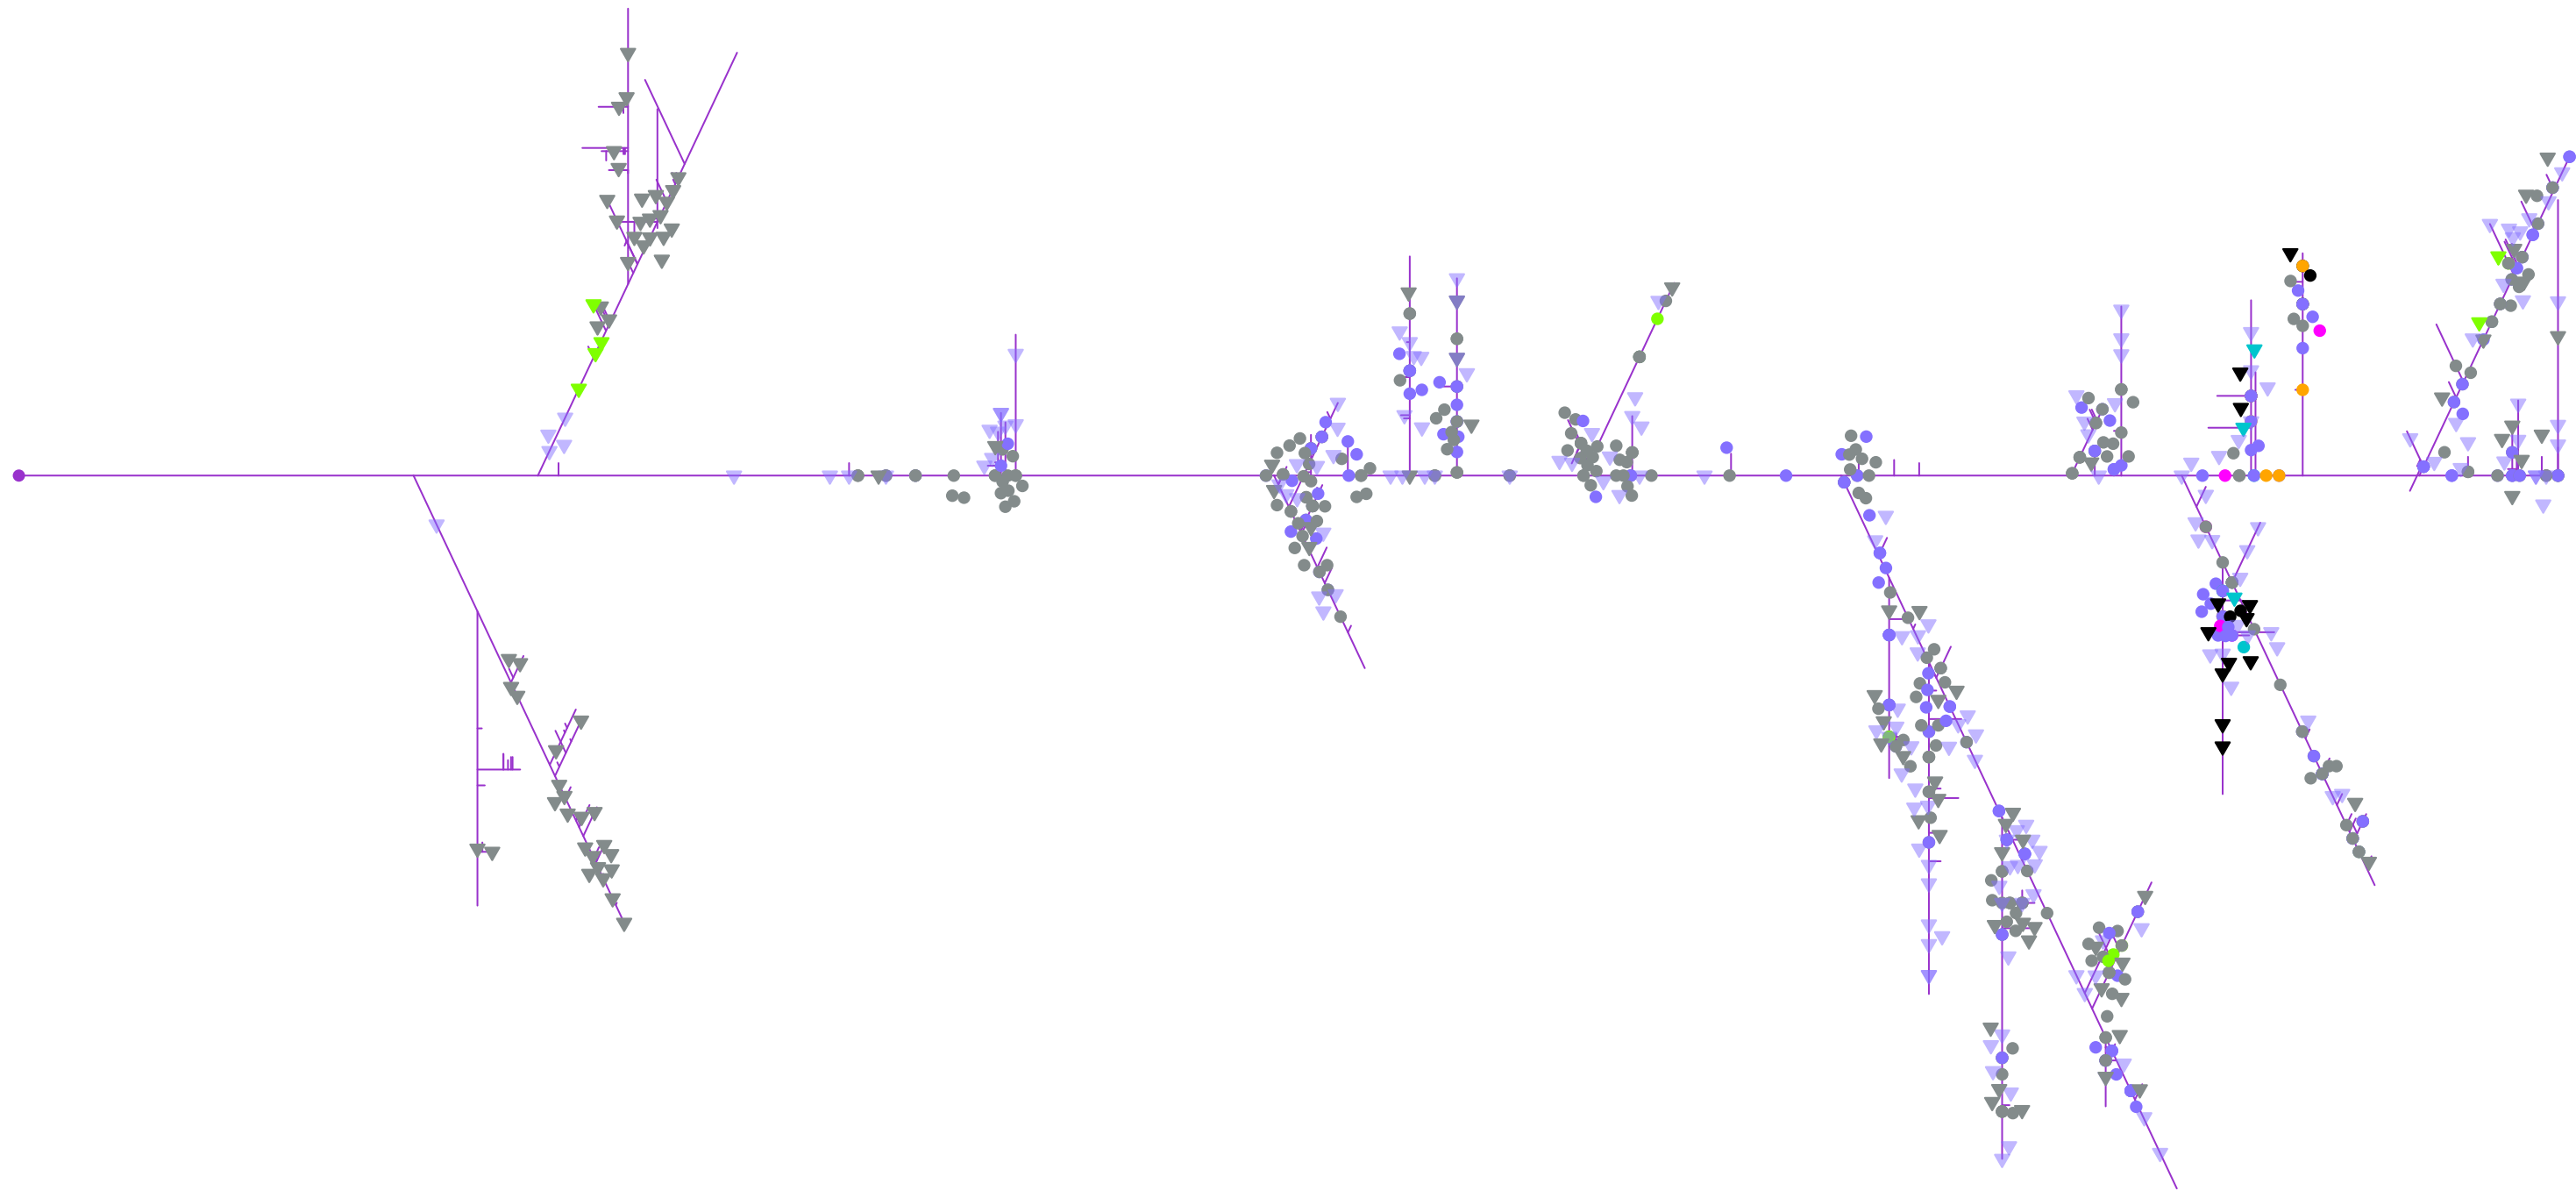

3 claw KC #4 (left)

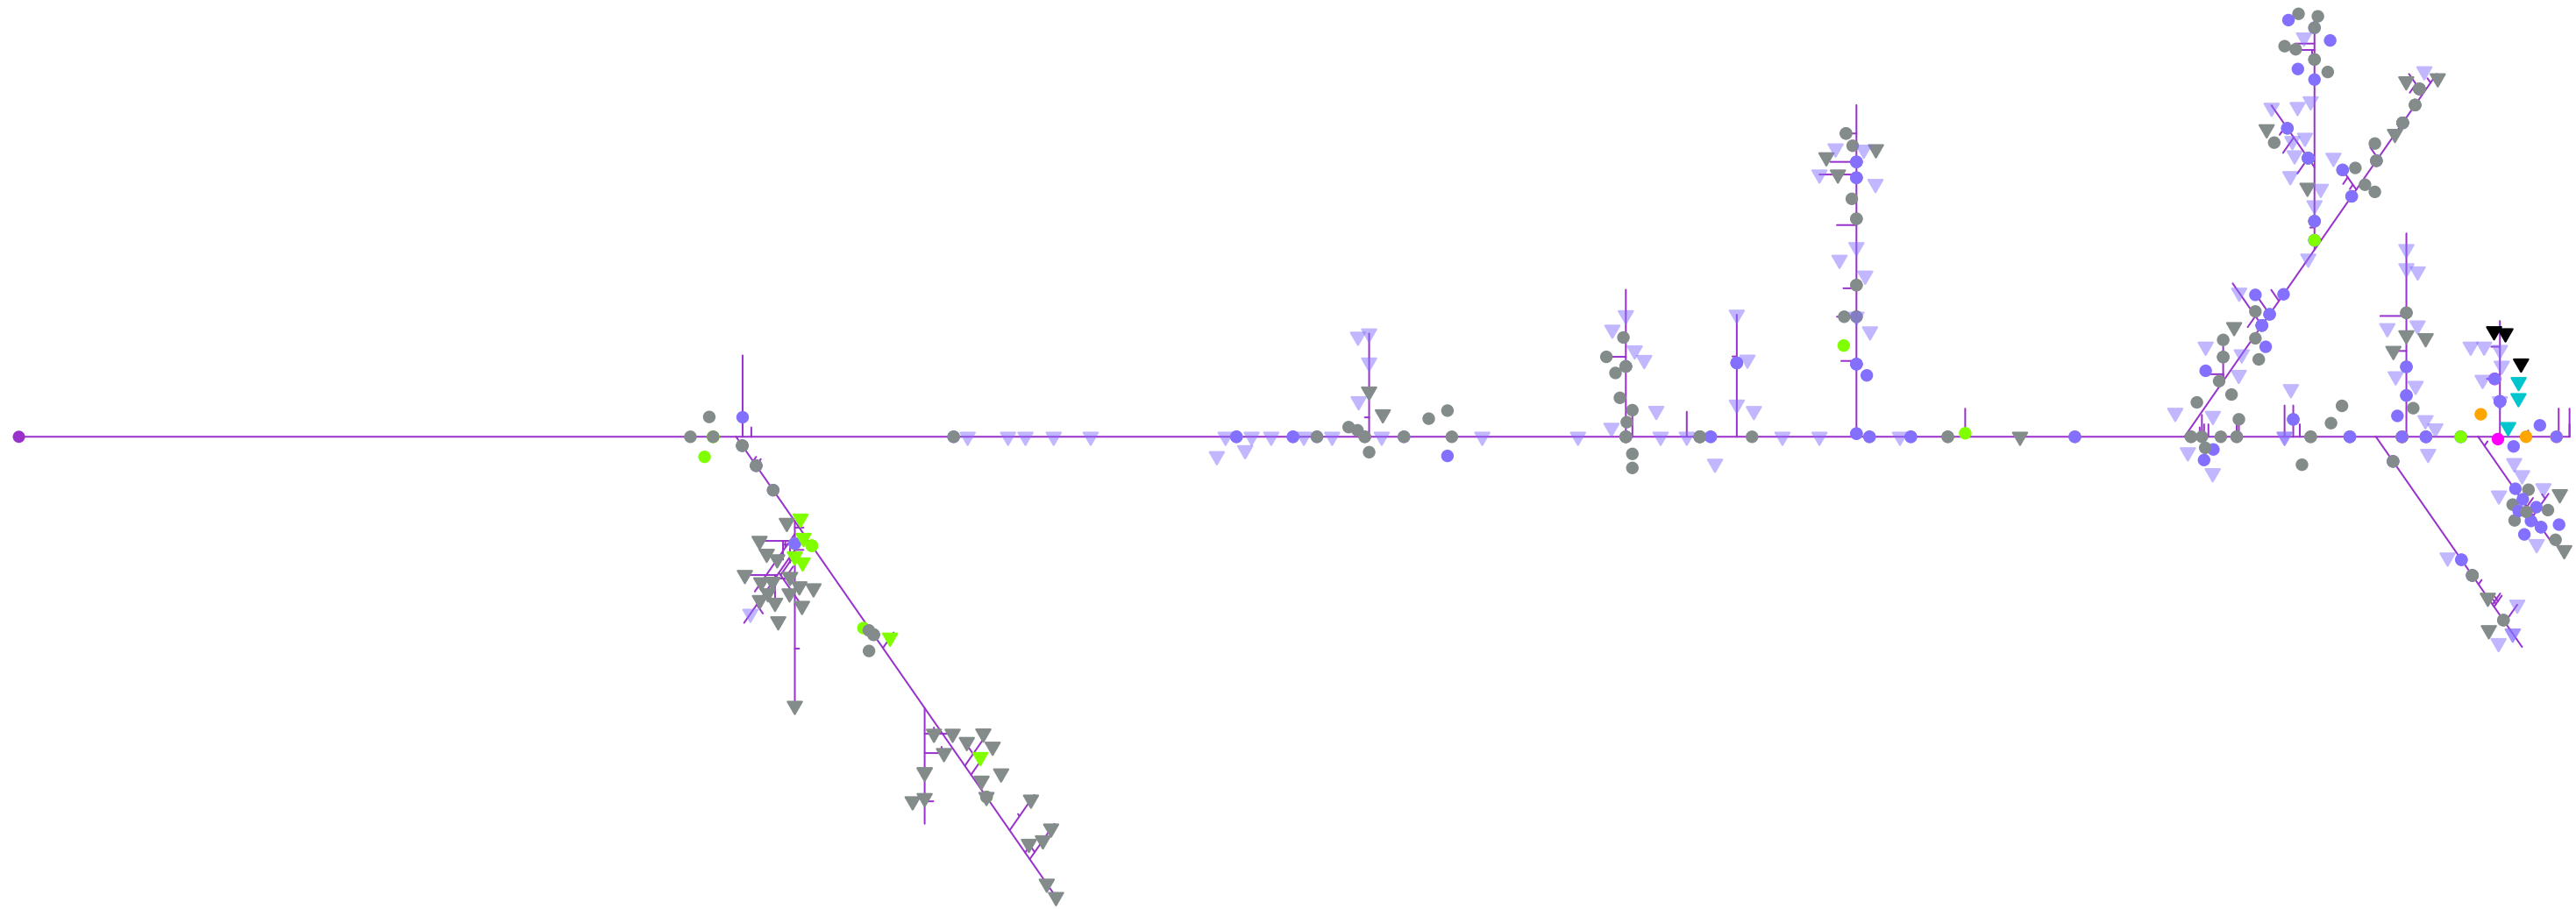



3 claw KC #5 (left)

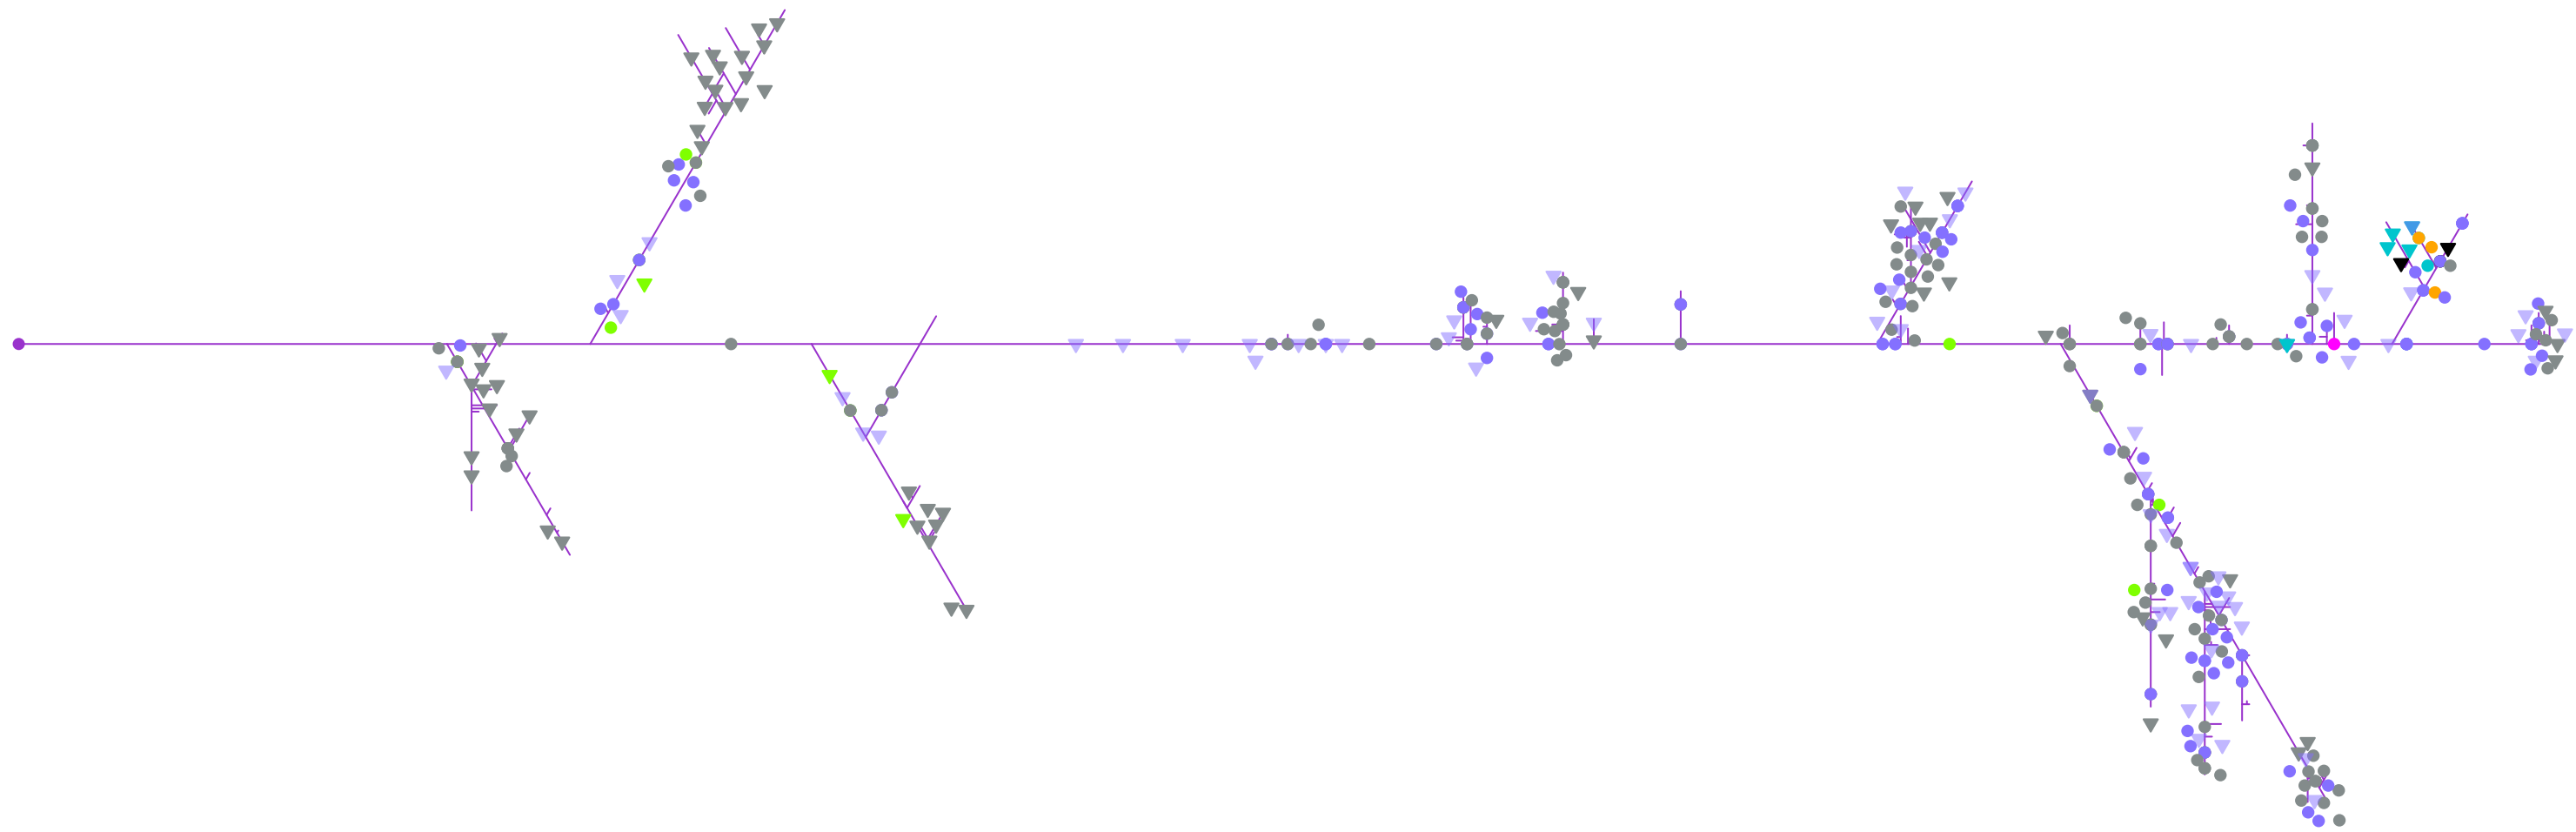

3 claw KC #6 (left)

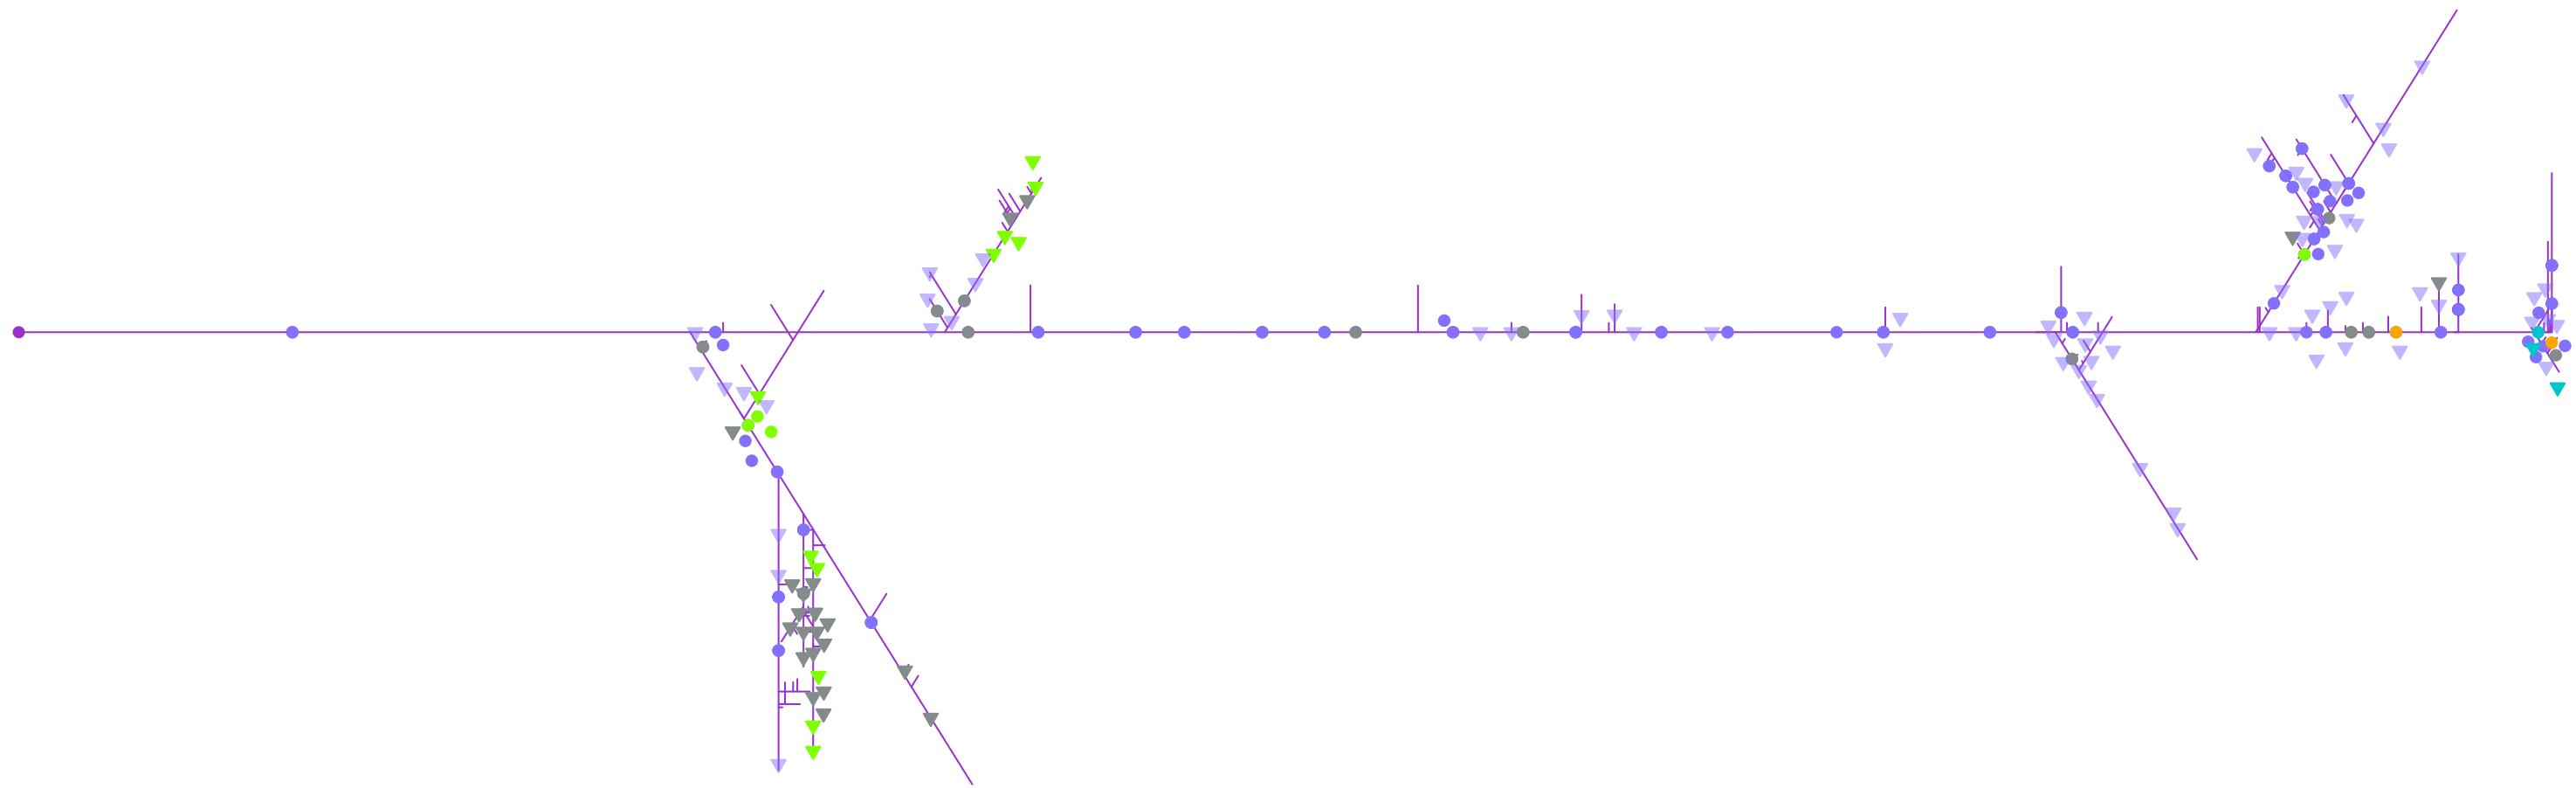



3 claw KC #8 (left)

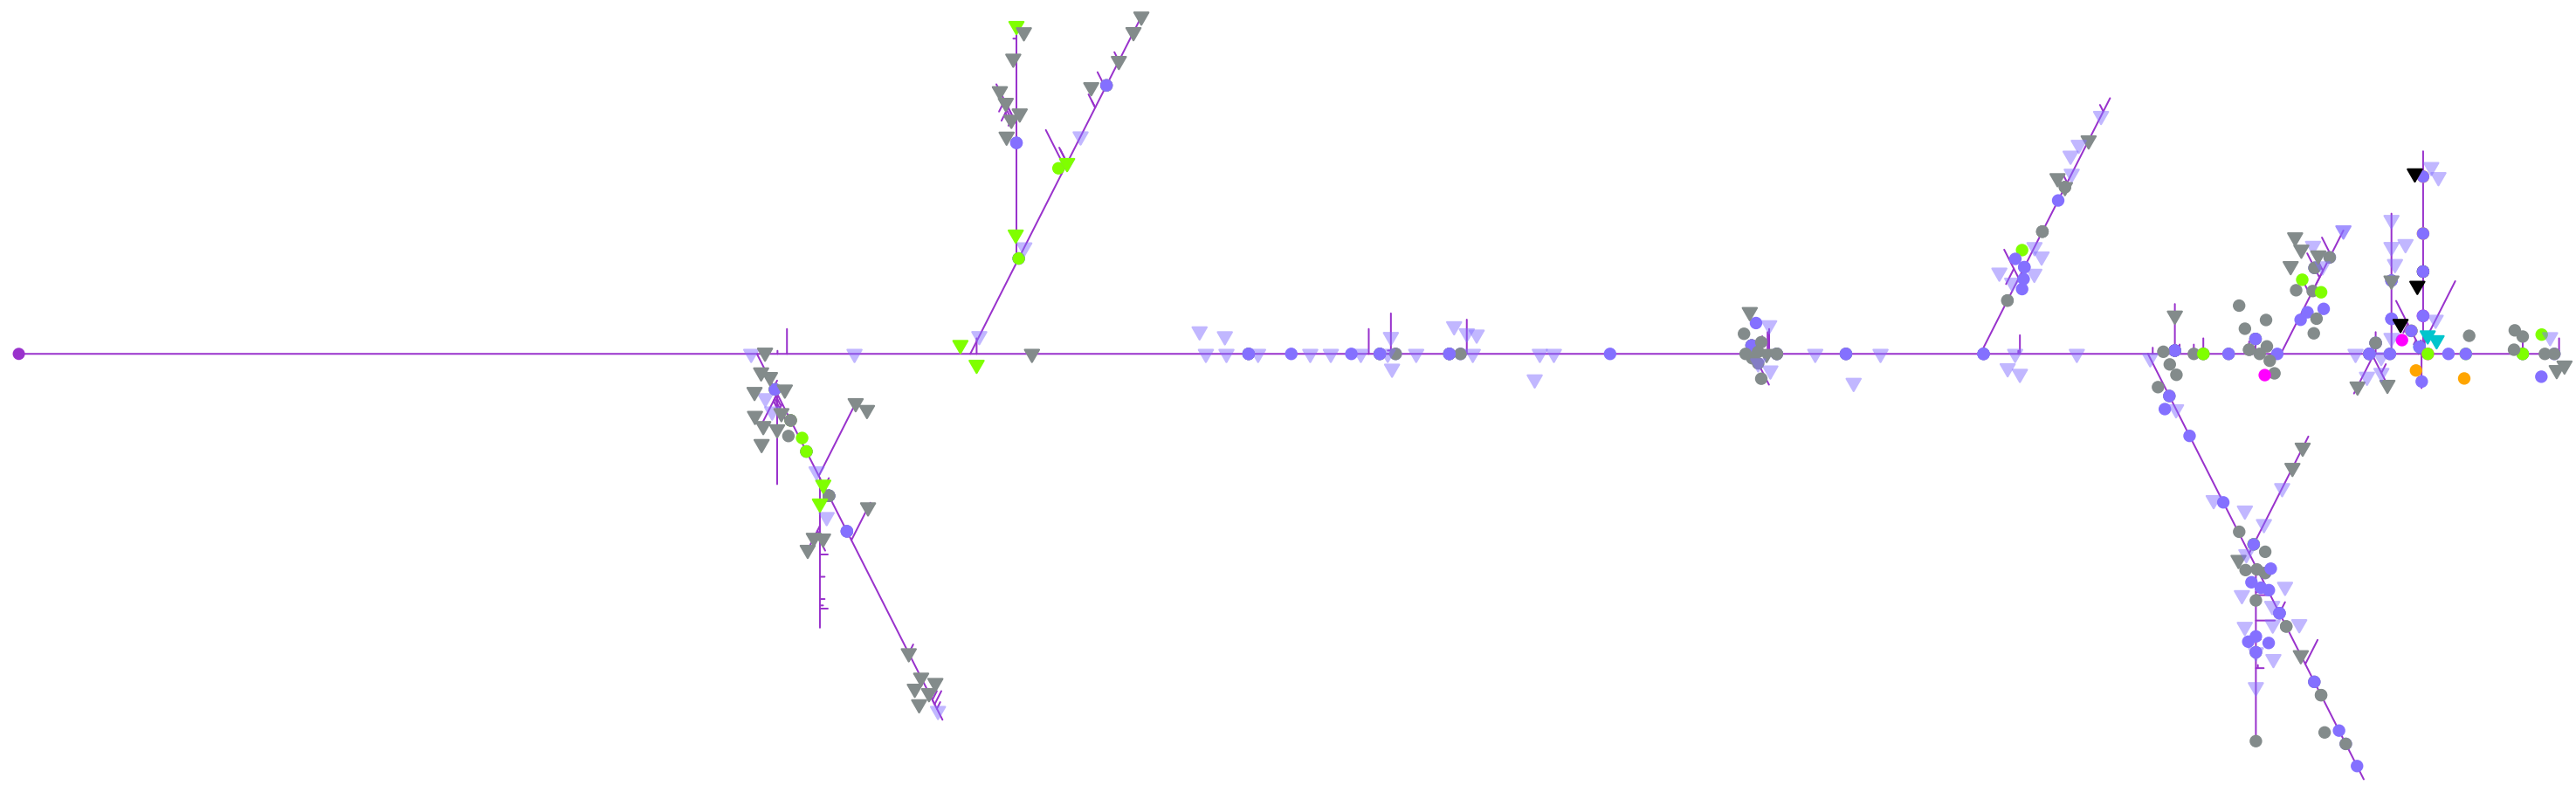

3 claw KC #9 (left)

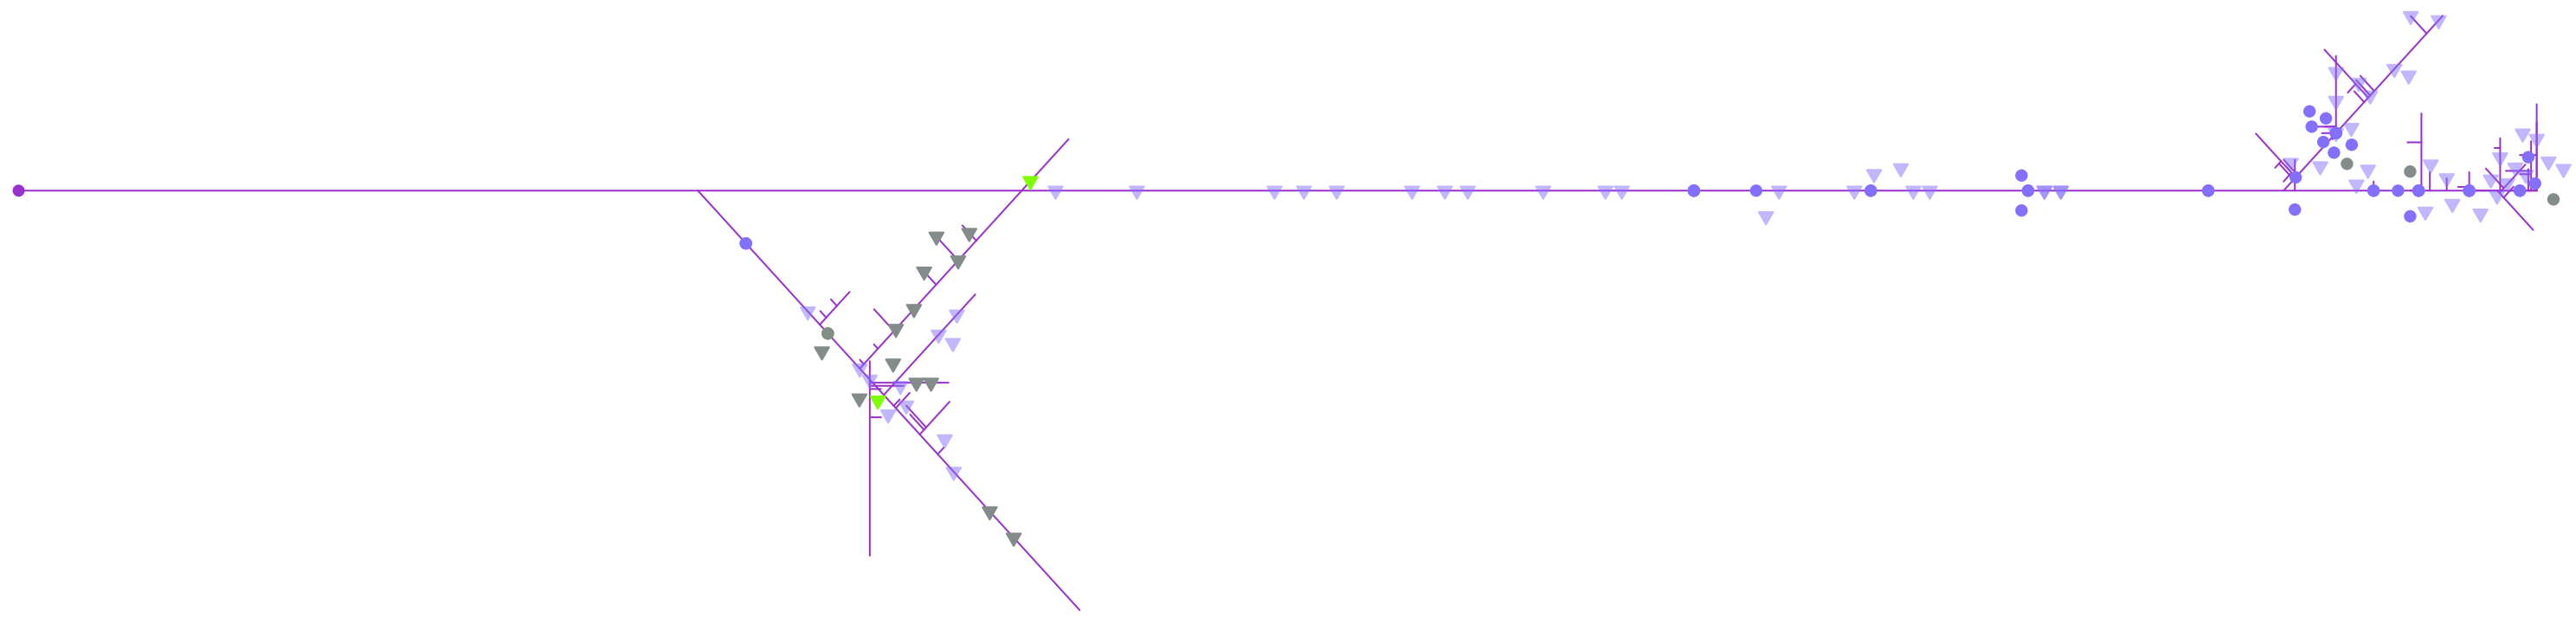

3 claw KC #10 (left)

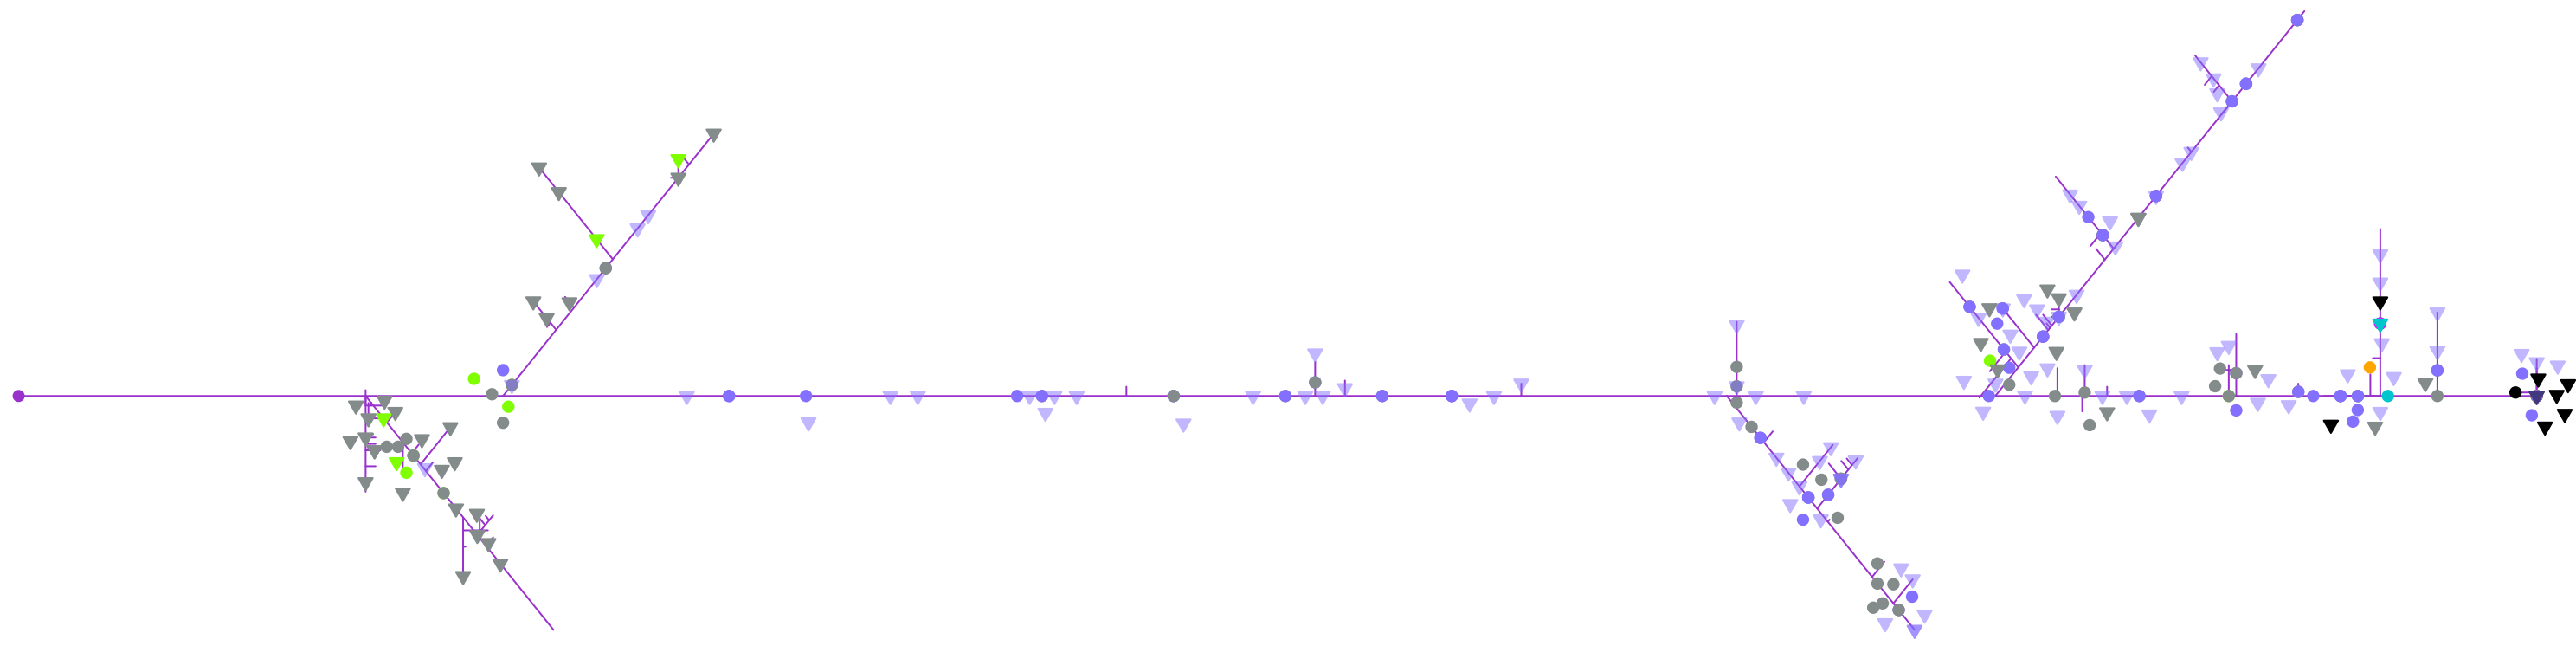

3 claw KC #11 (left)

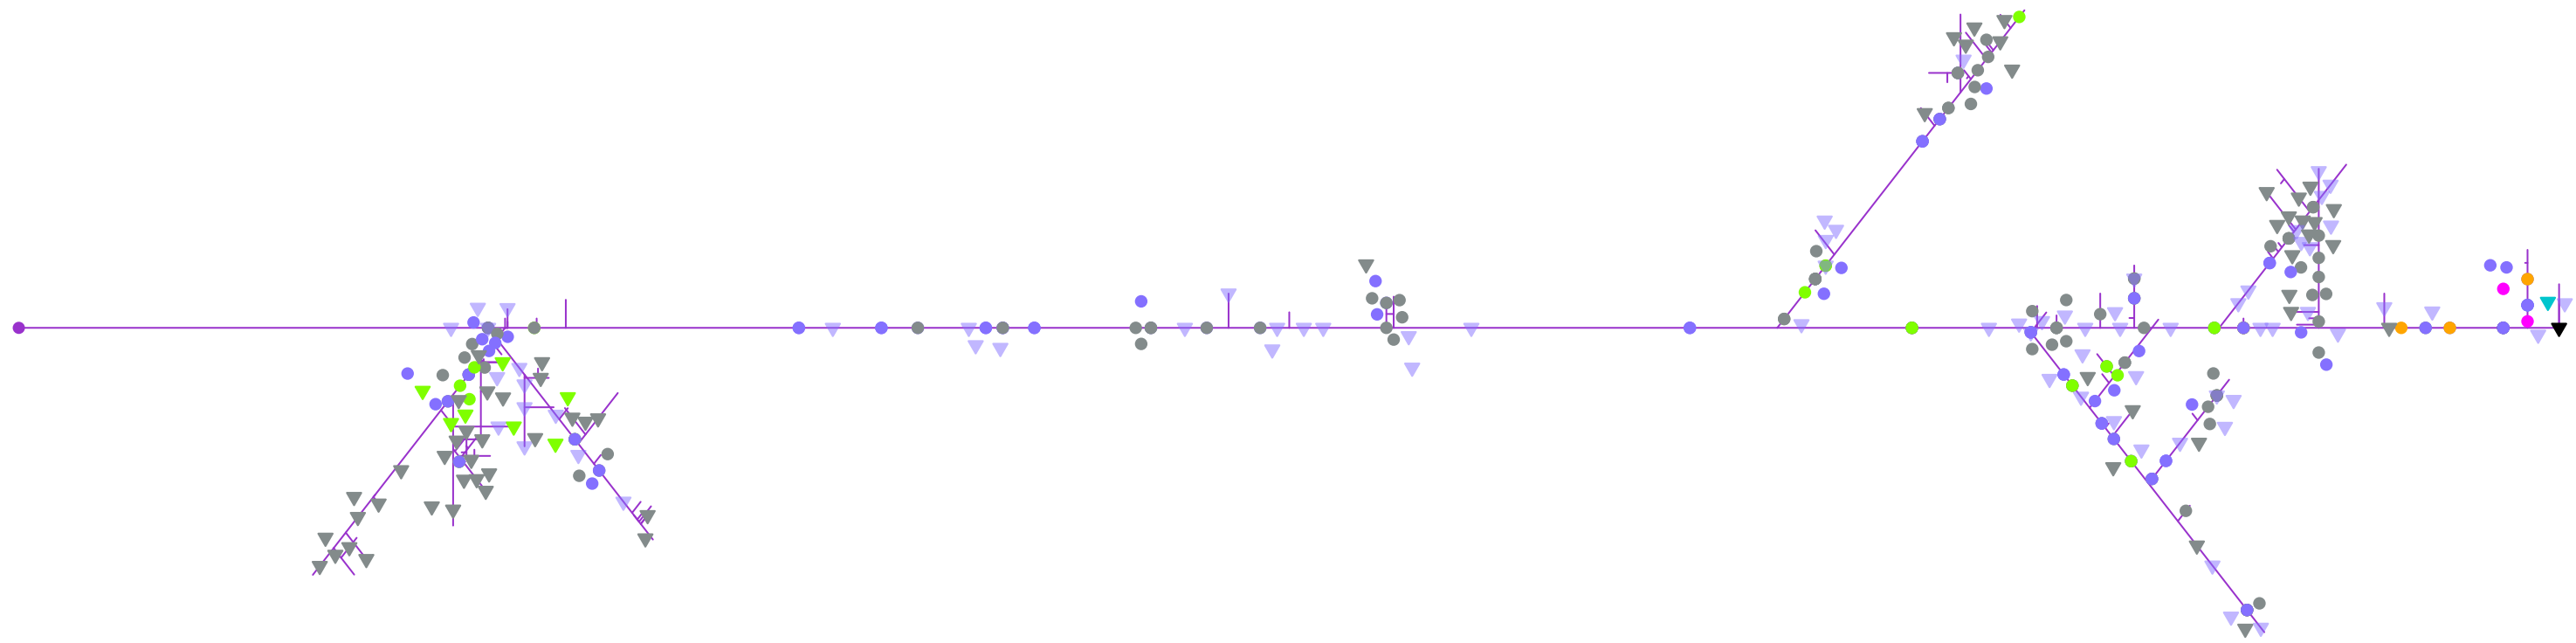

3 claw KC #12 (left)

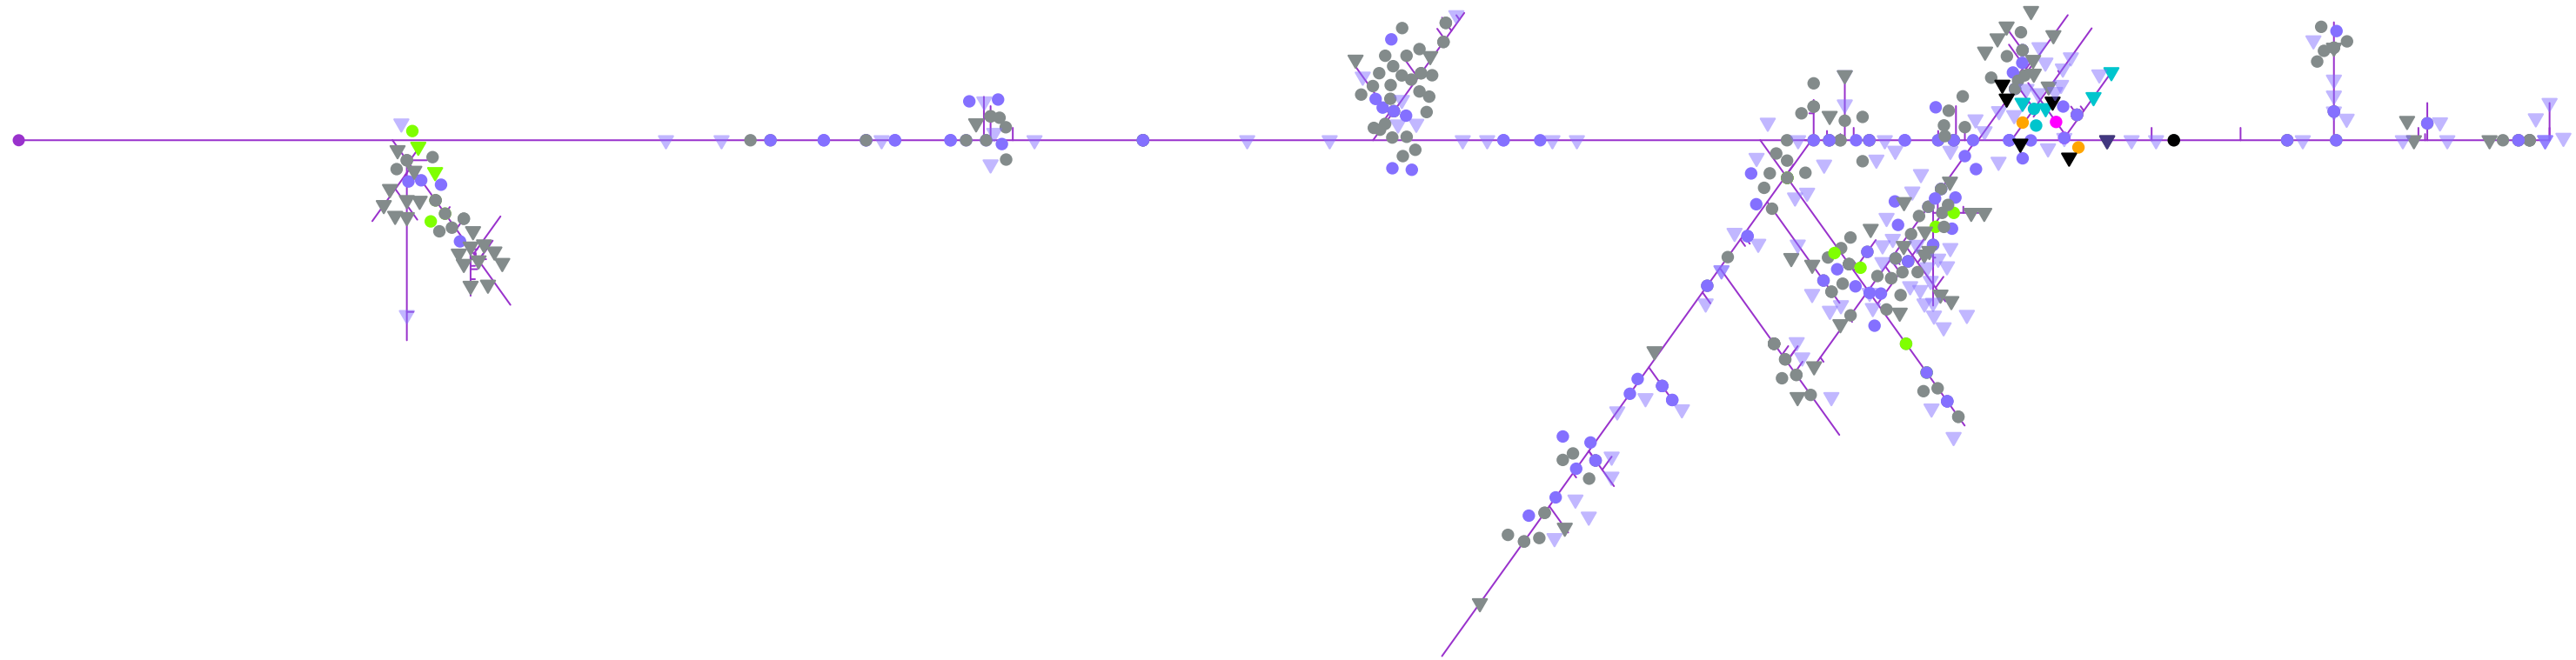





3 claw KC #14 (left)

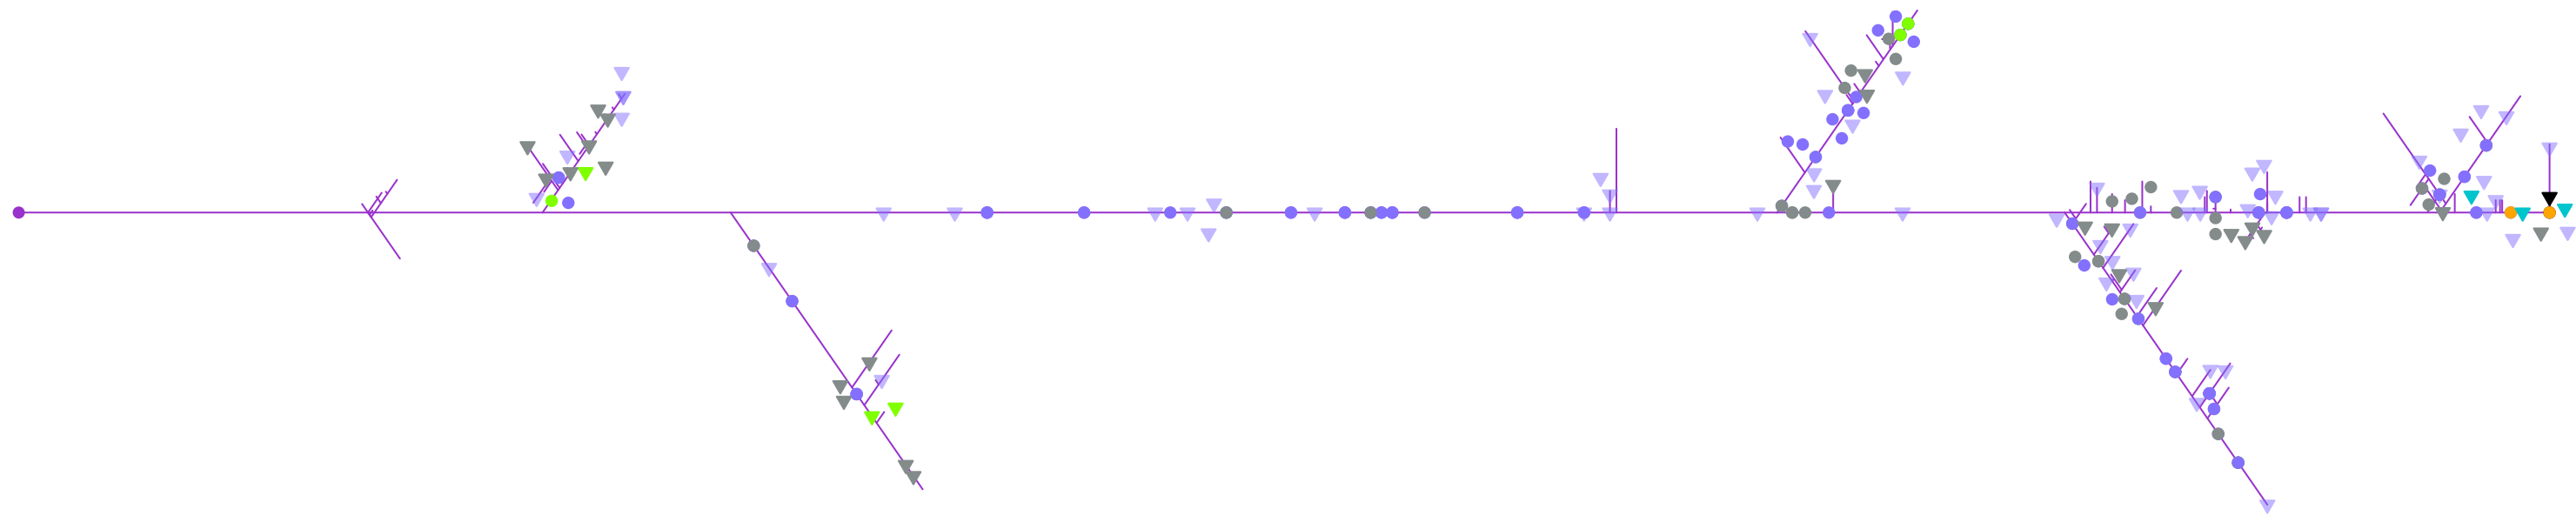

3 claw KC #15 (left)

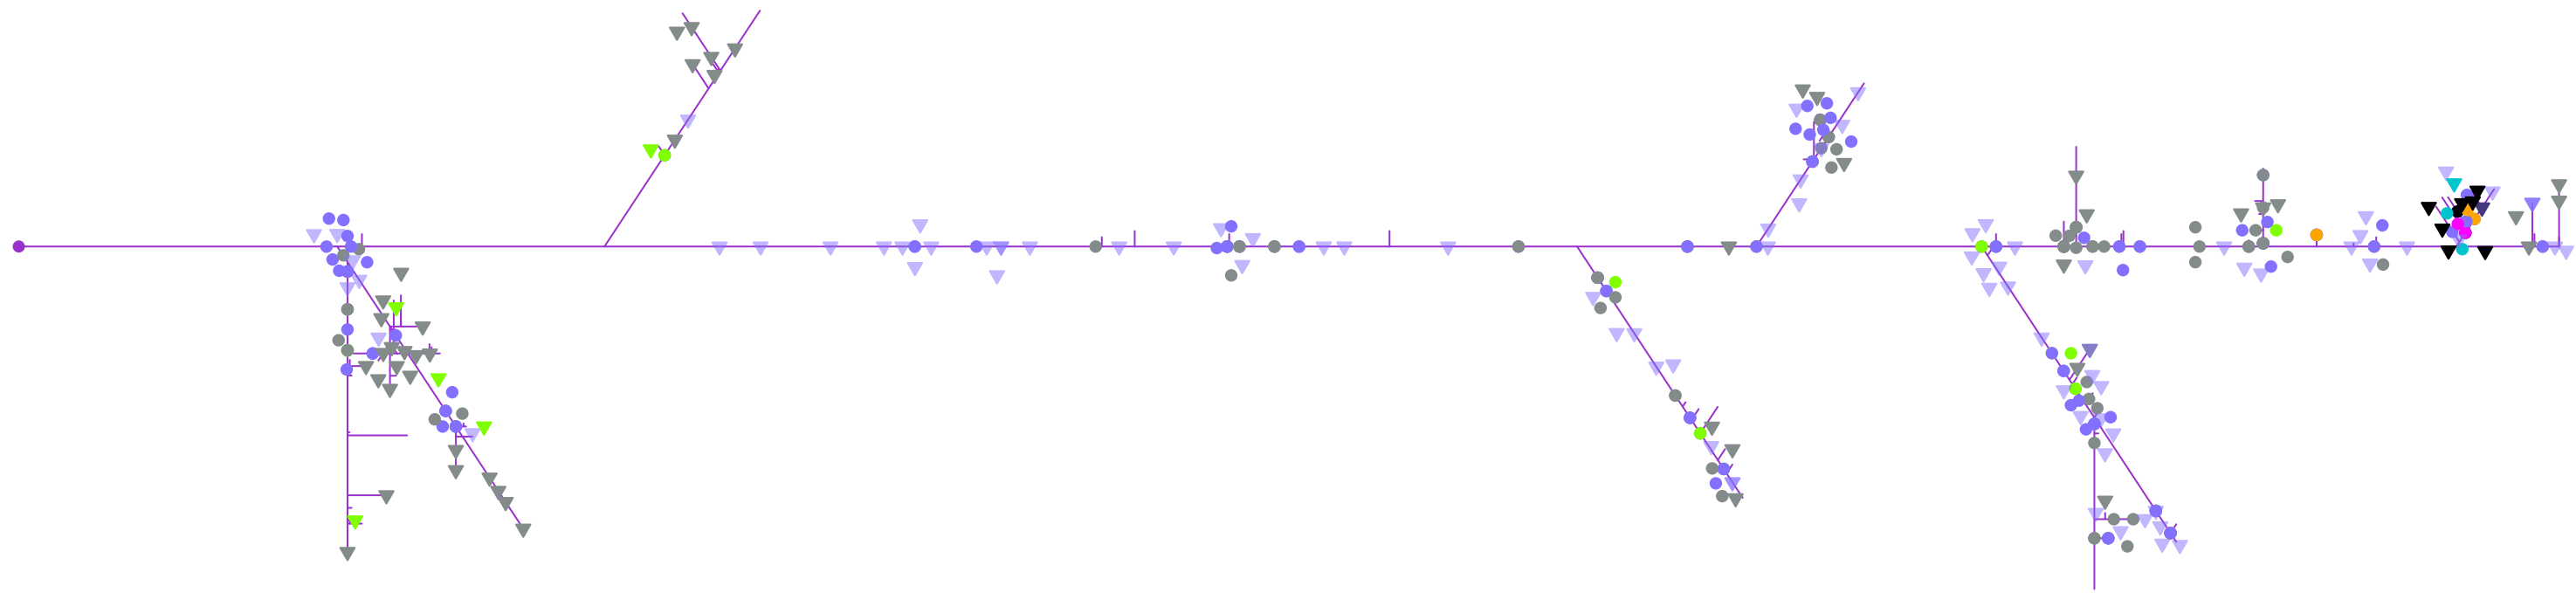

3 claw KC #16 (left)

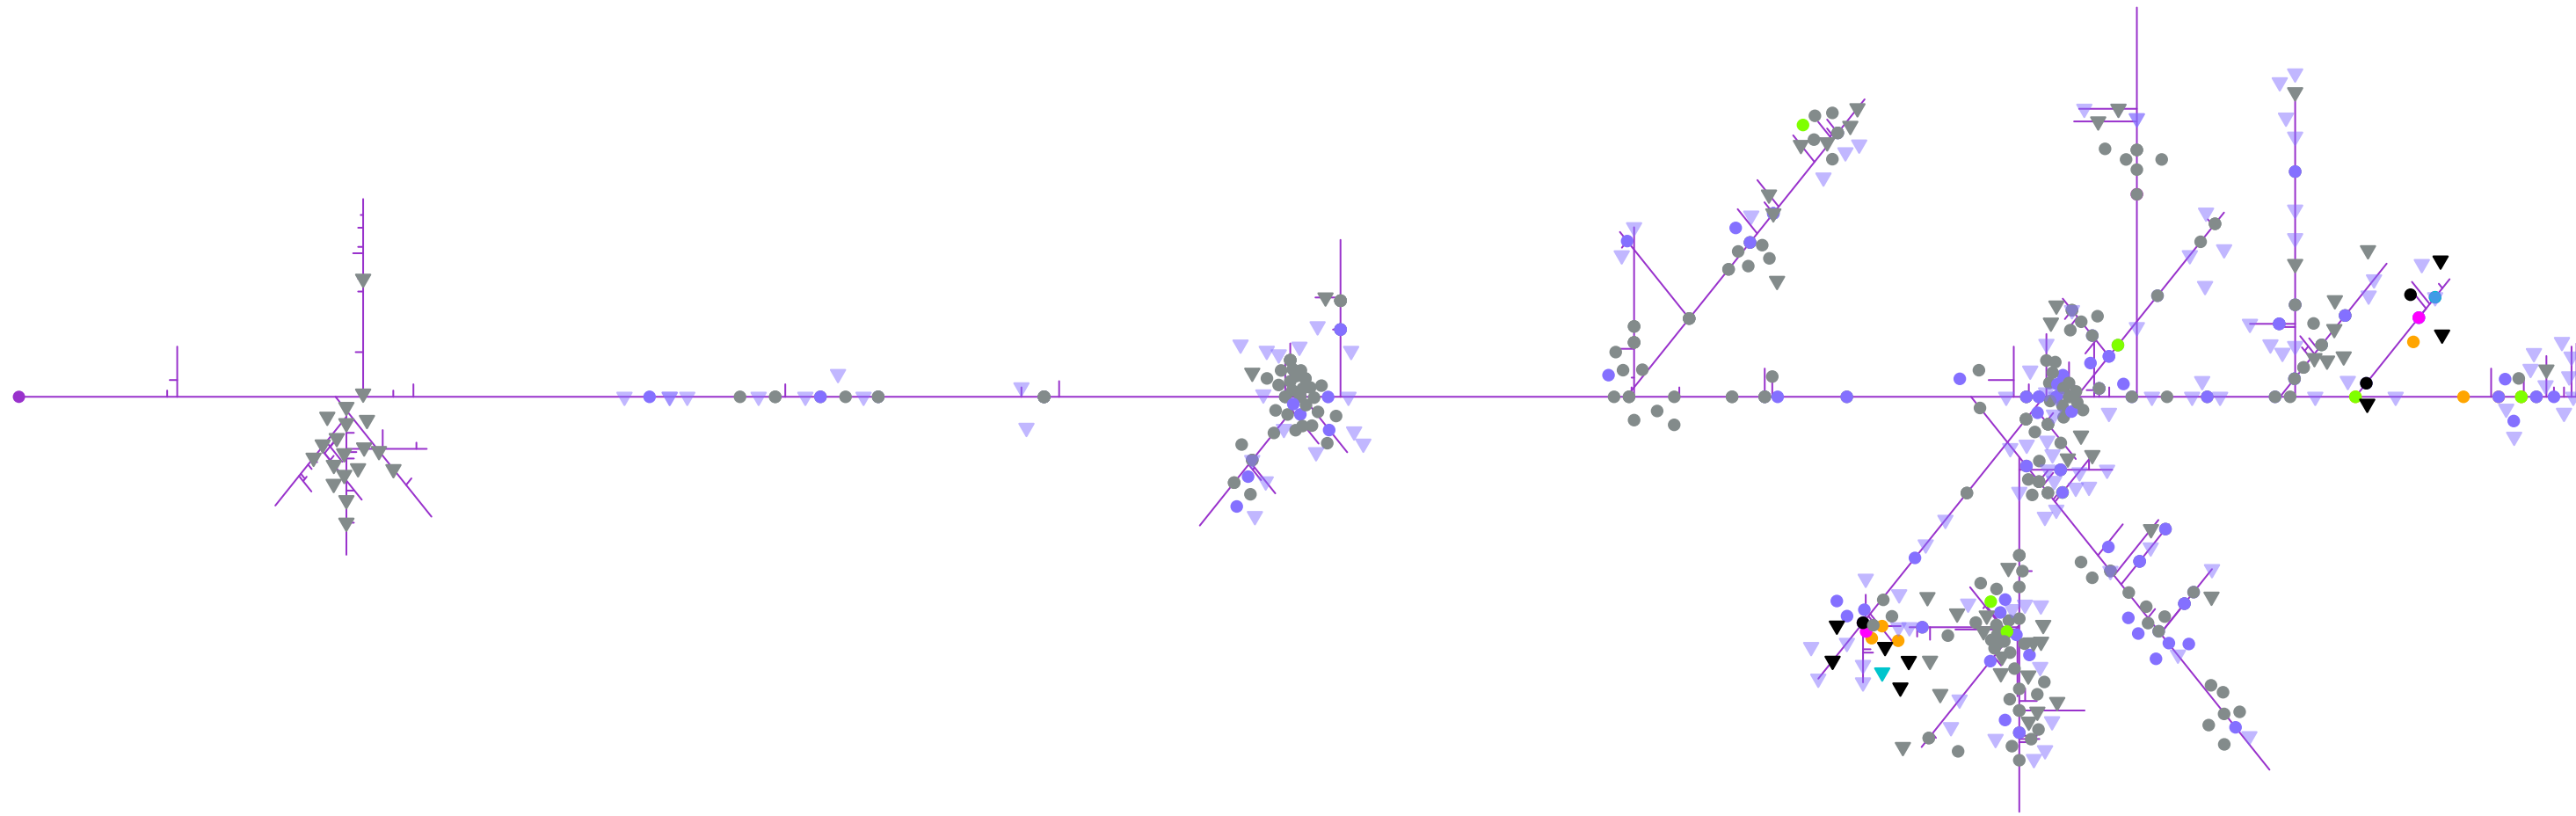





4 claw KC #3 (left)

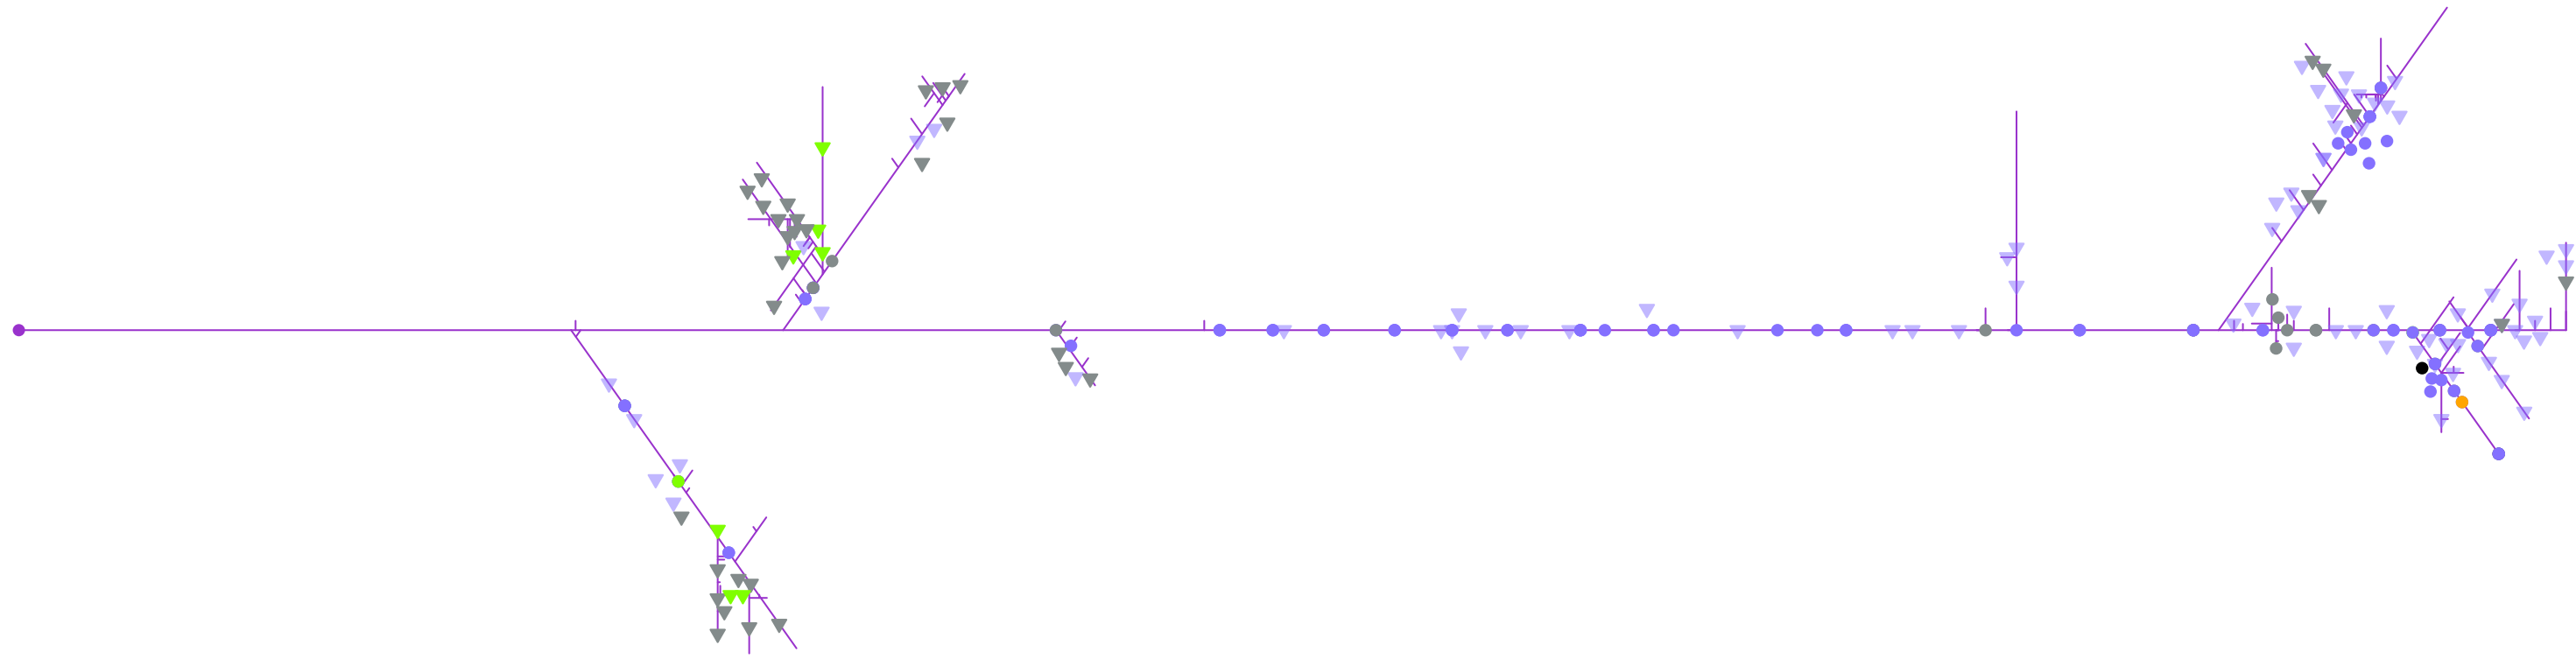

4 claw KC #4 (left)

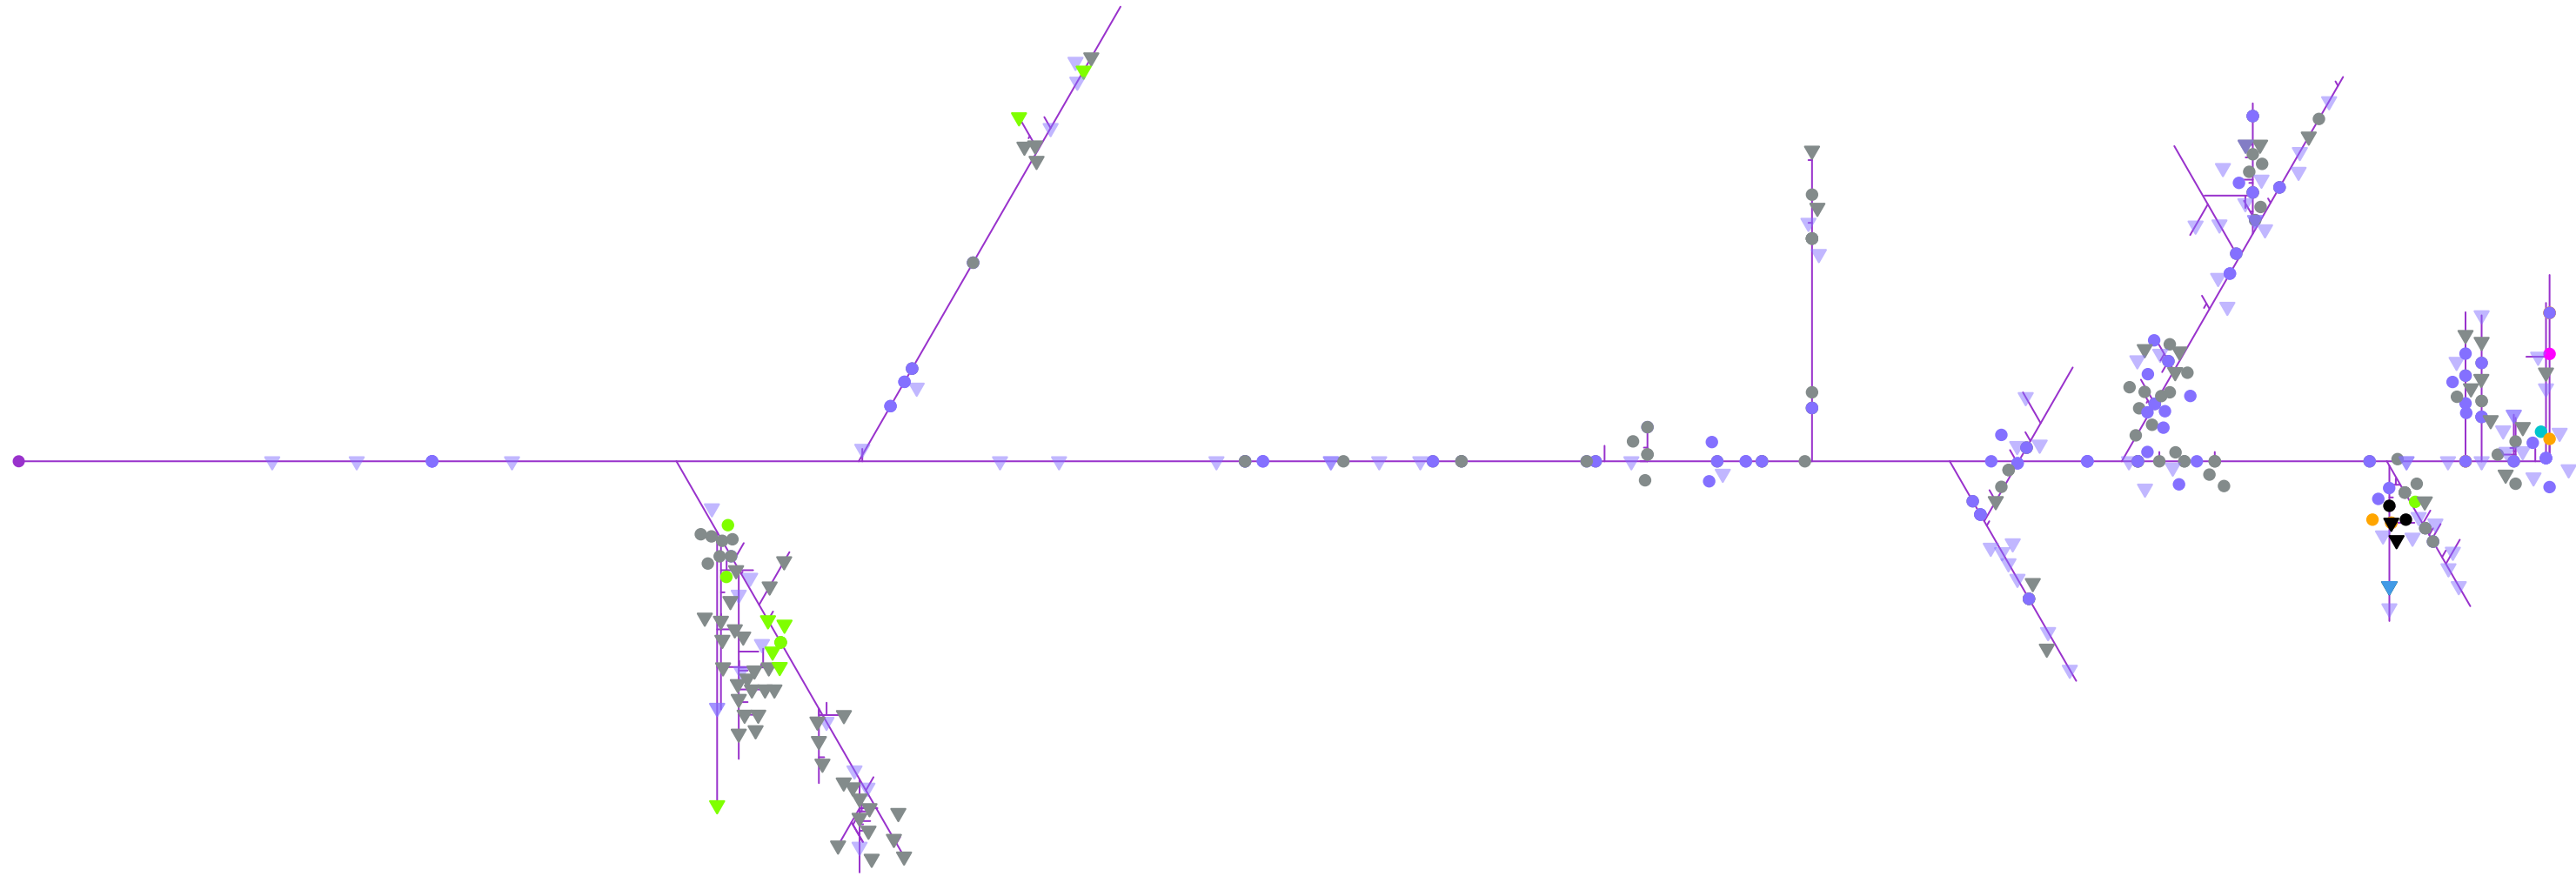



4 claw KC #5 (left)

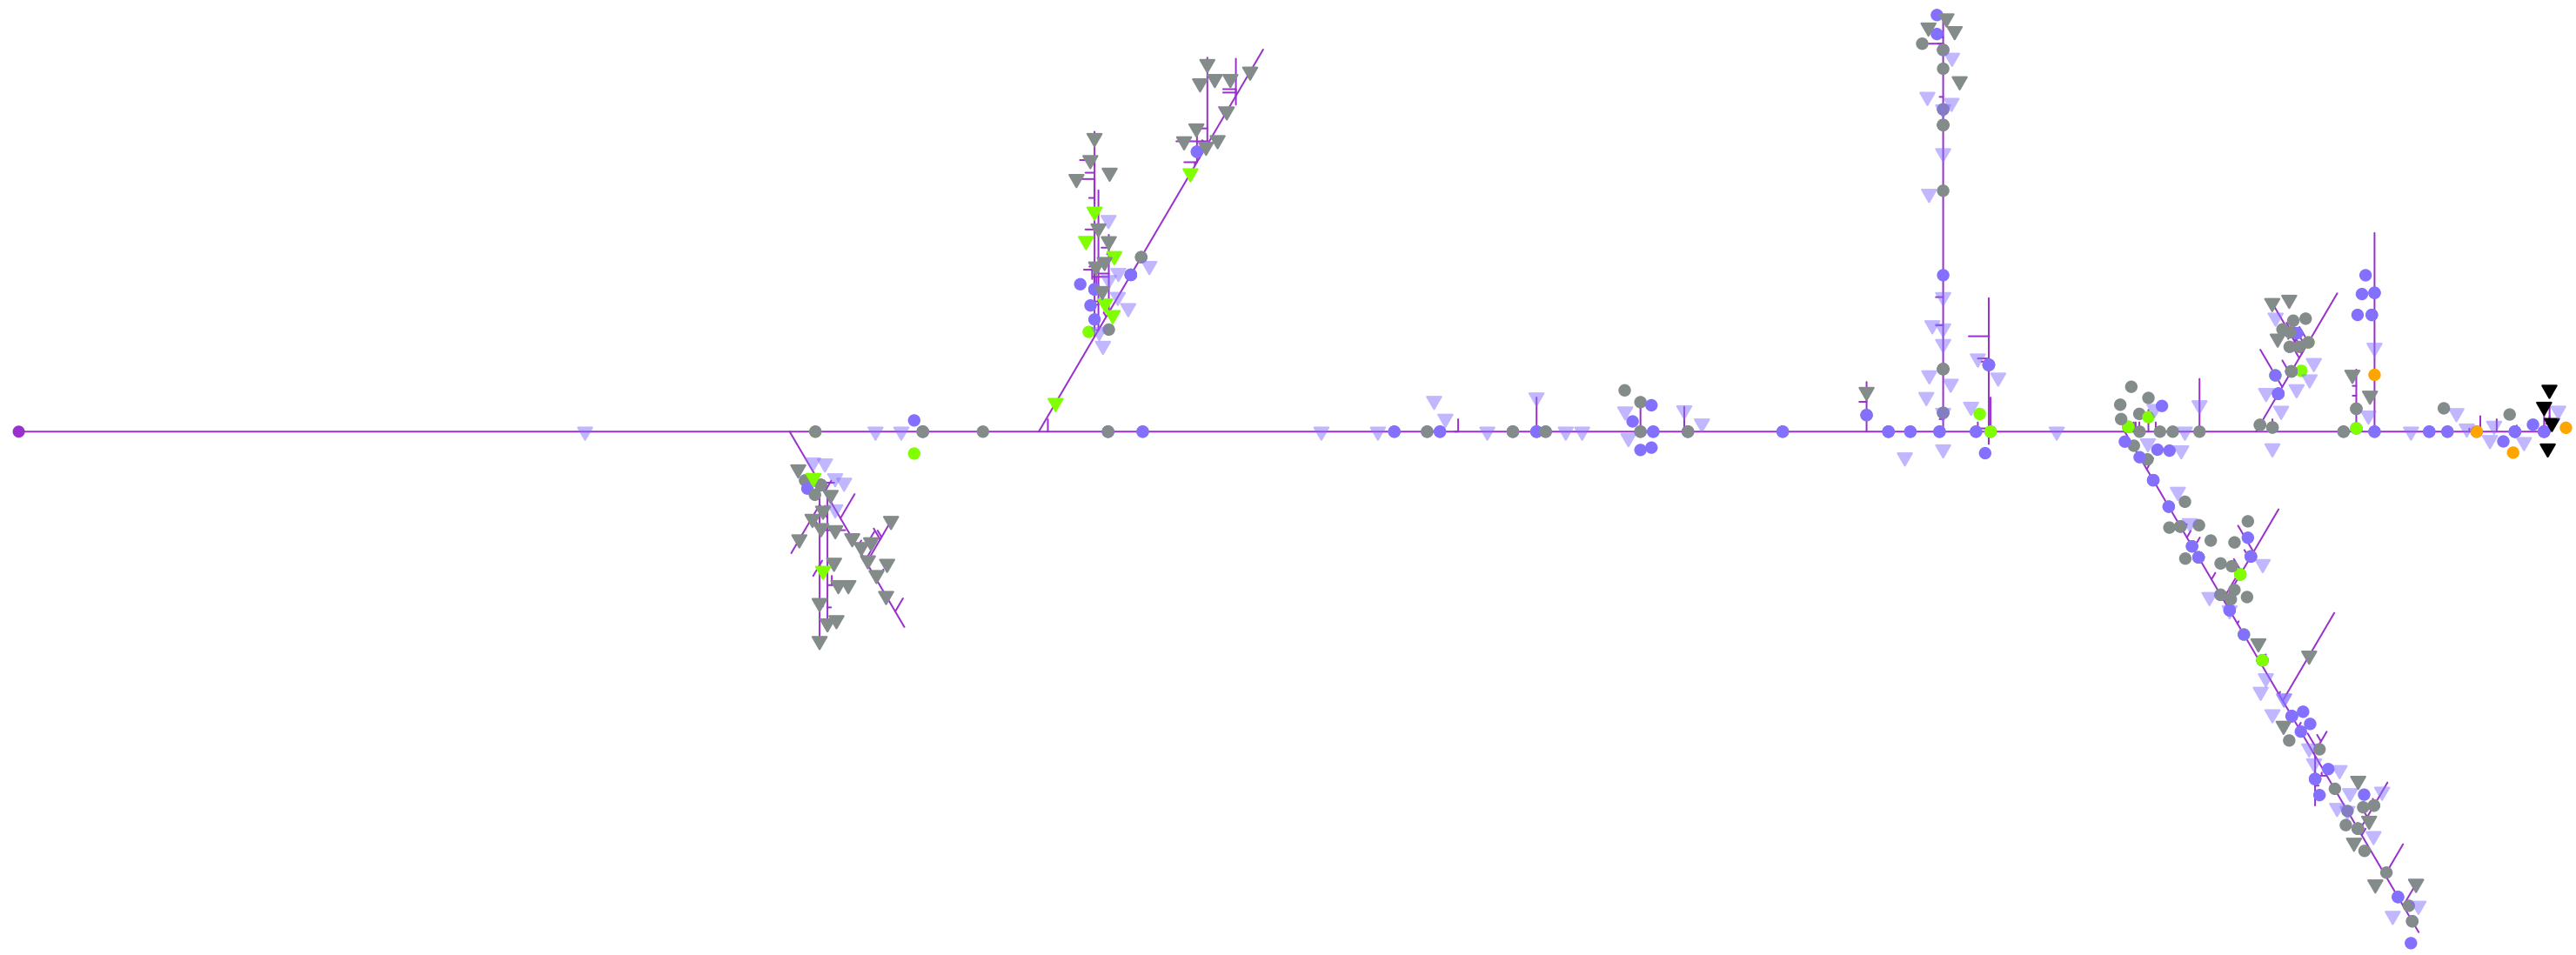

4 claw KC #6 (left)

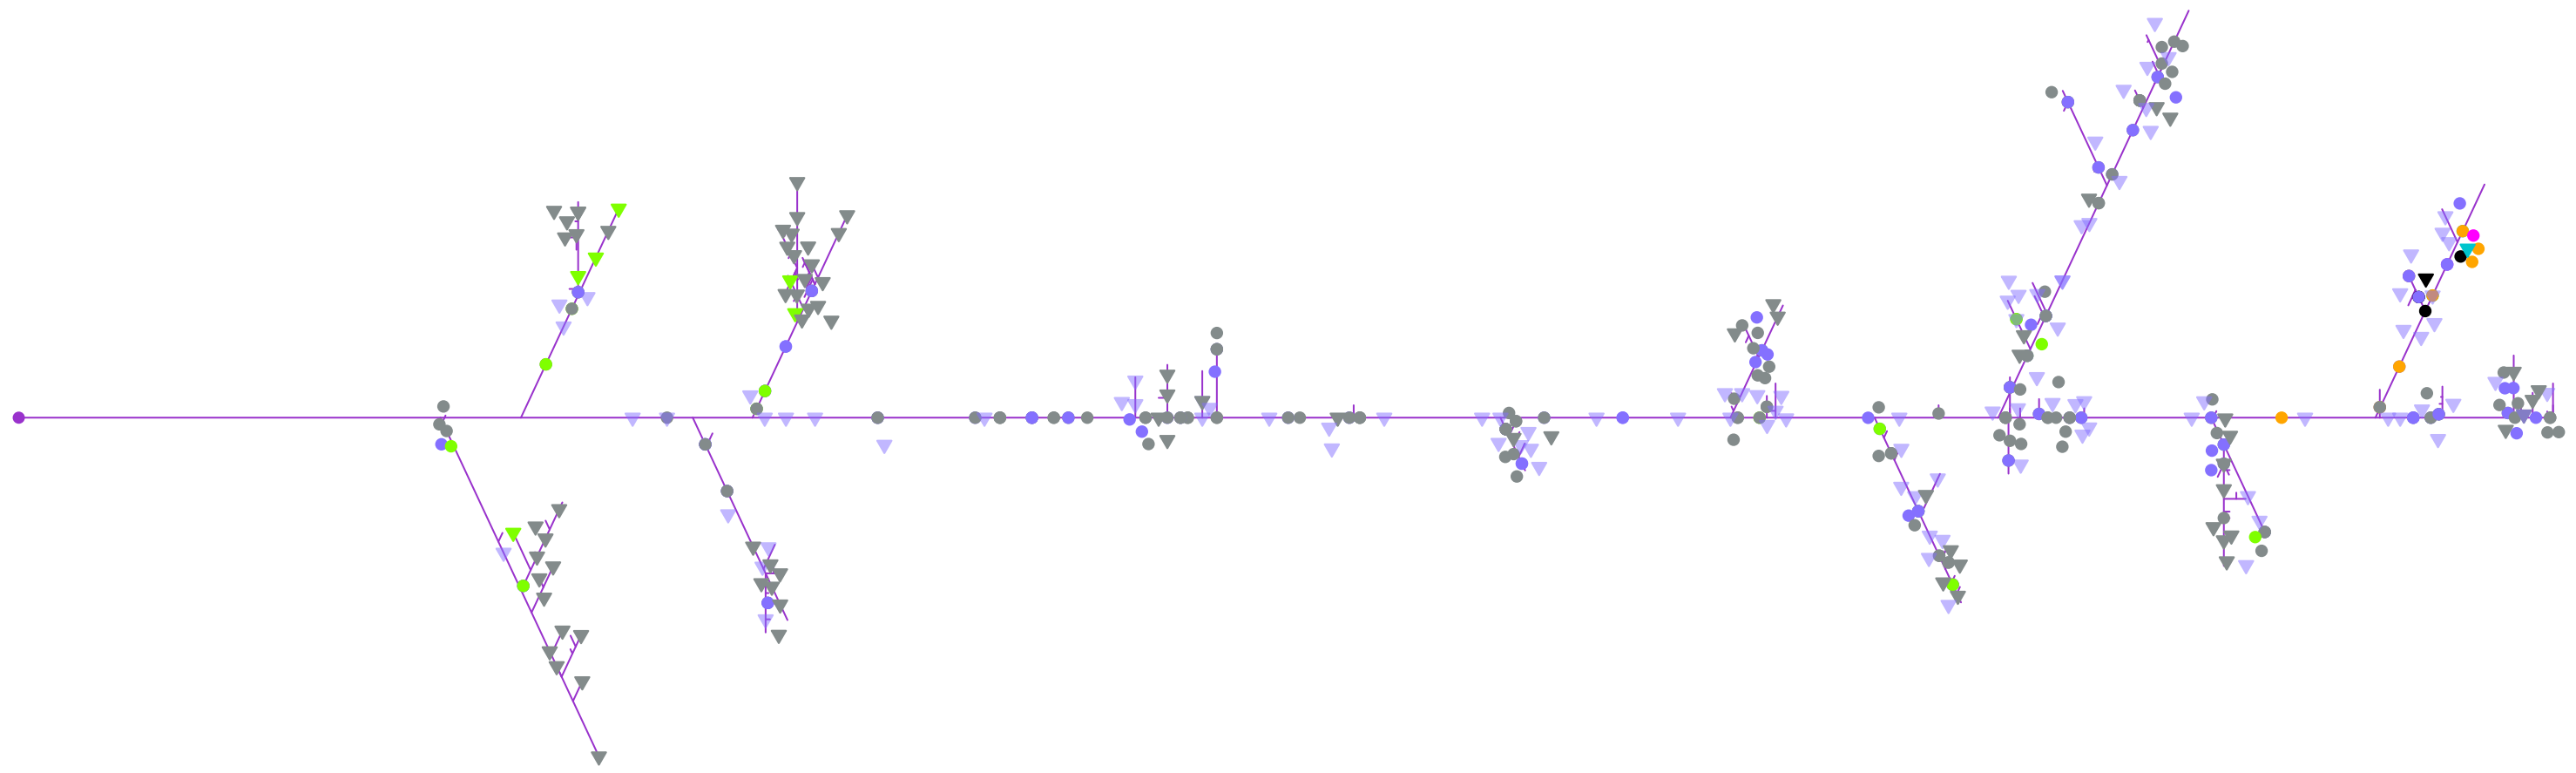

4 claw KC #7 (left)

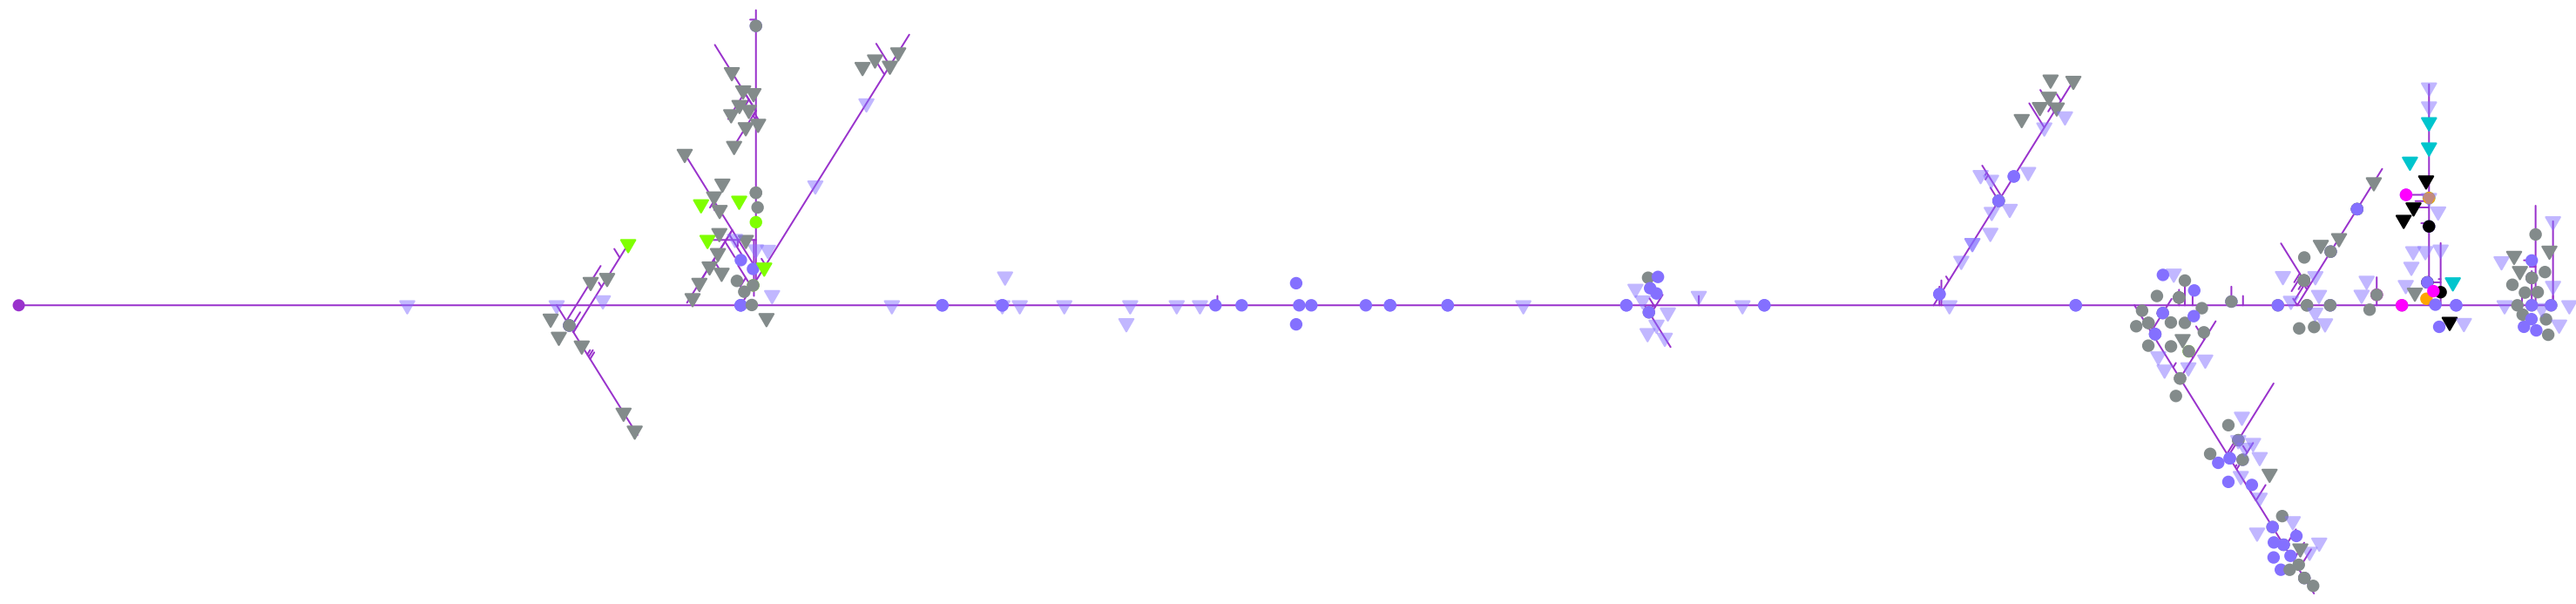

4 claw KC #8 (left)

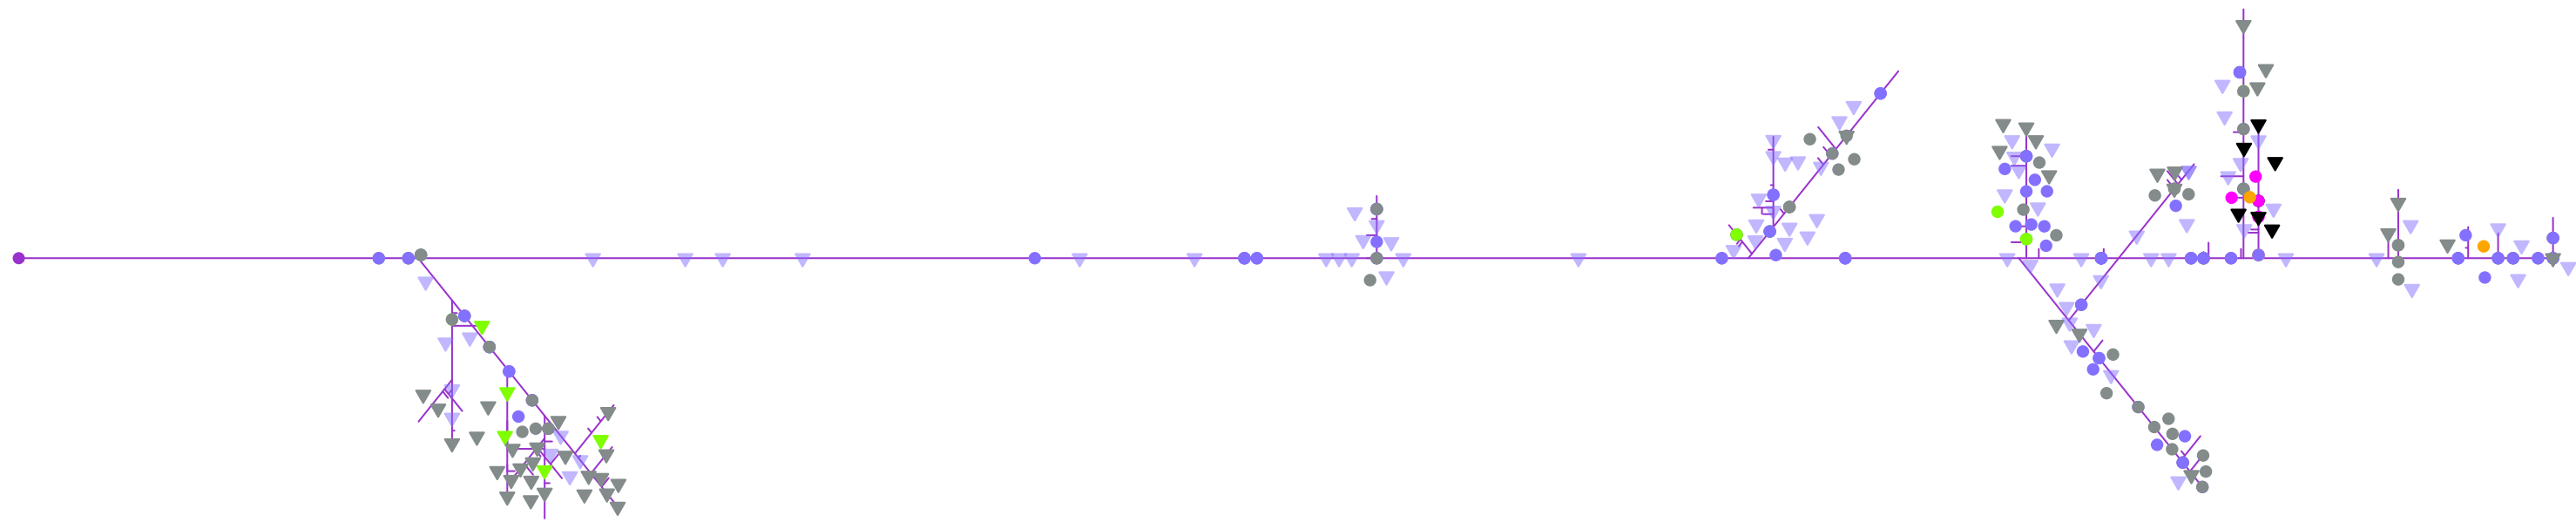

4 claw KC #9 (left)

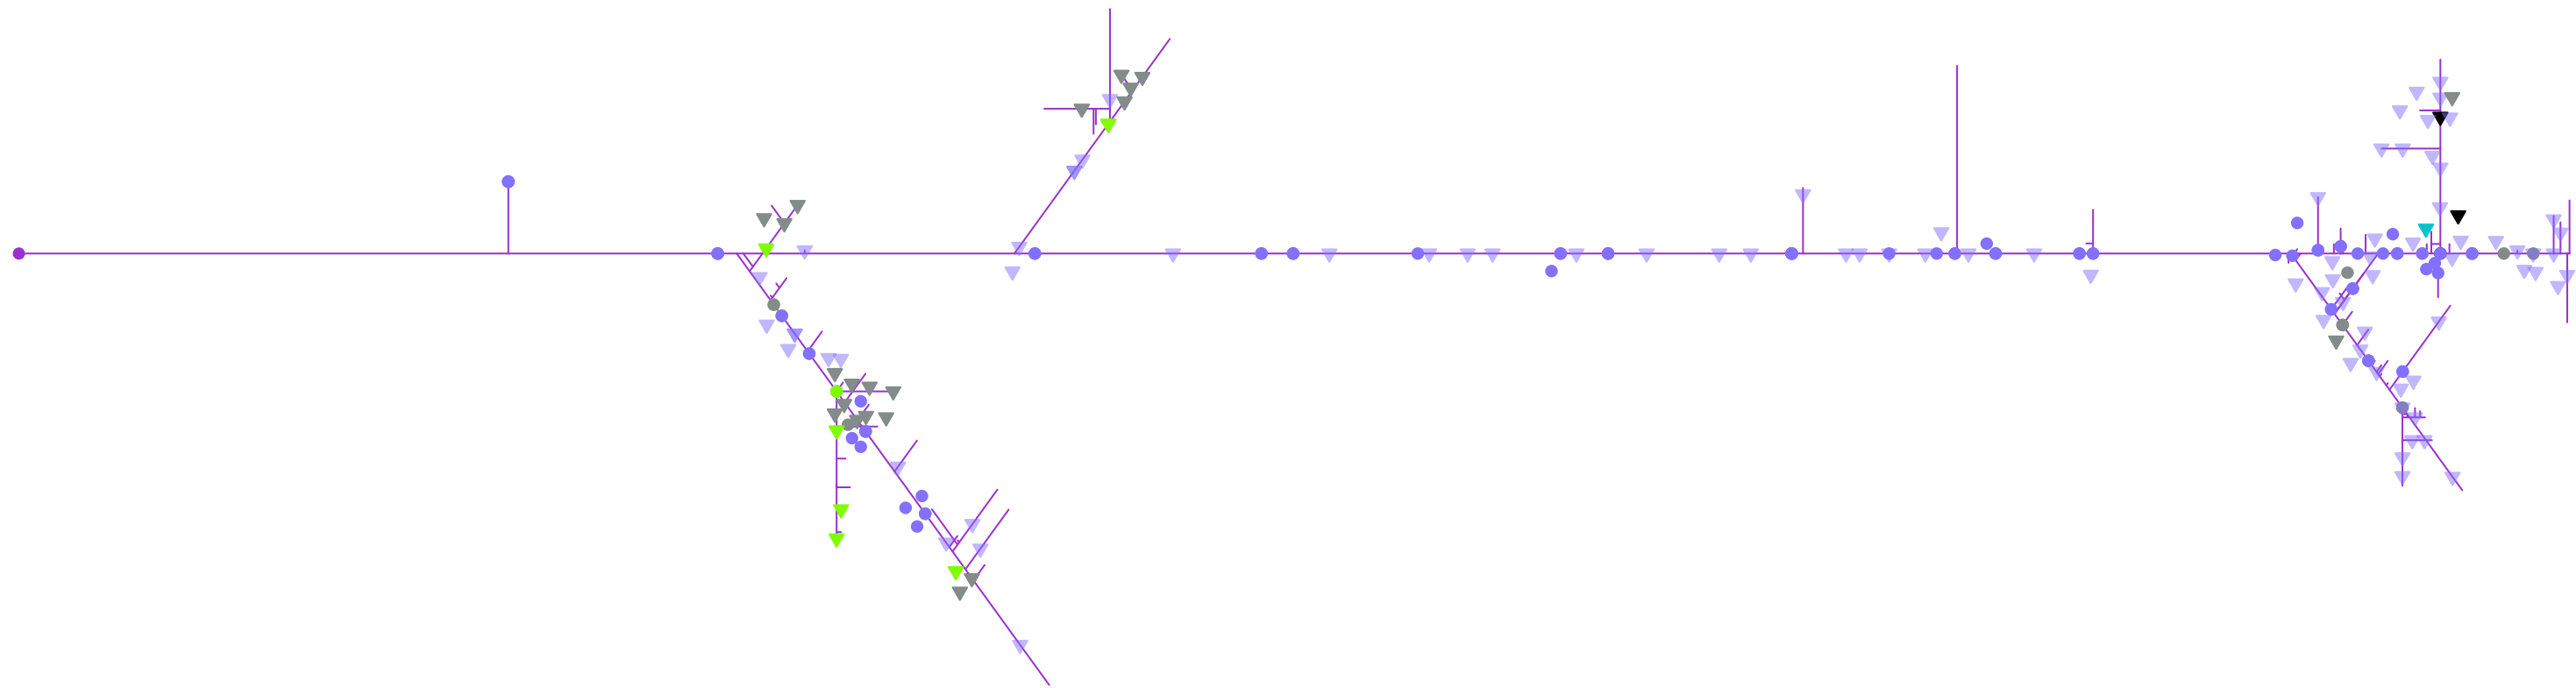

4 claw KC #10 (left)

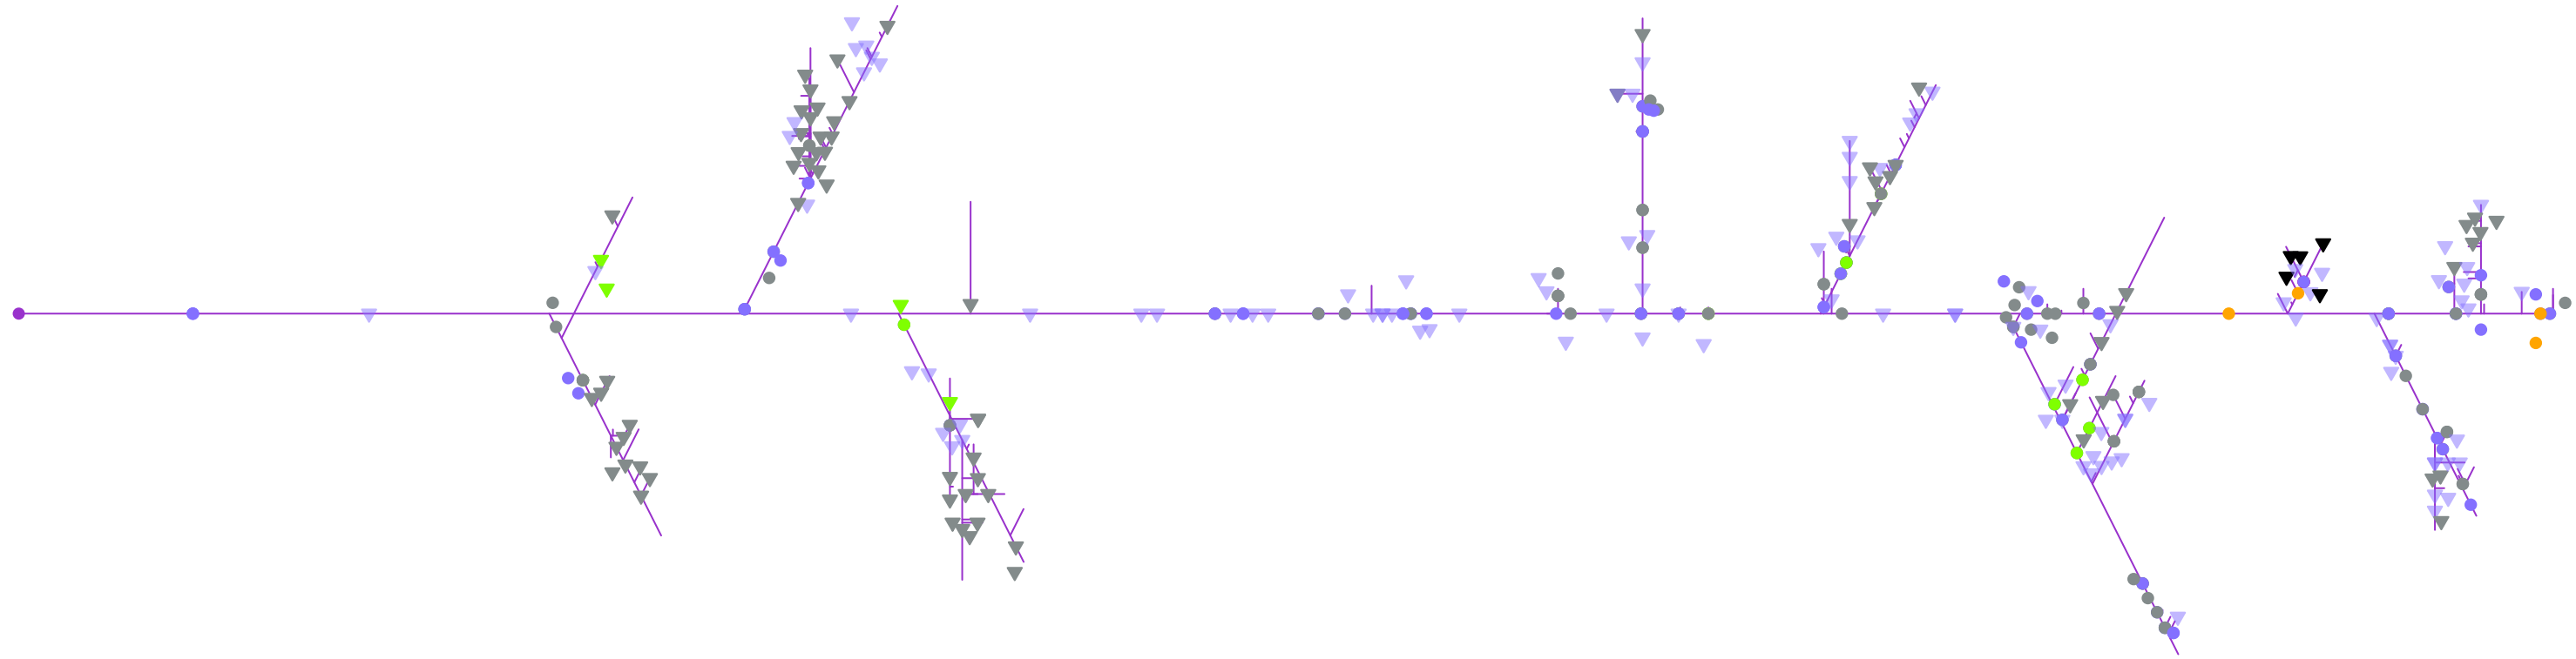

4 claw KC #11 (left)

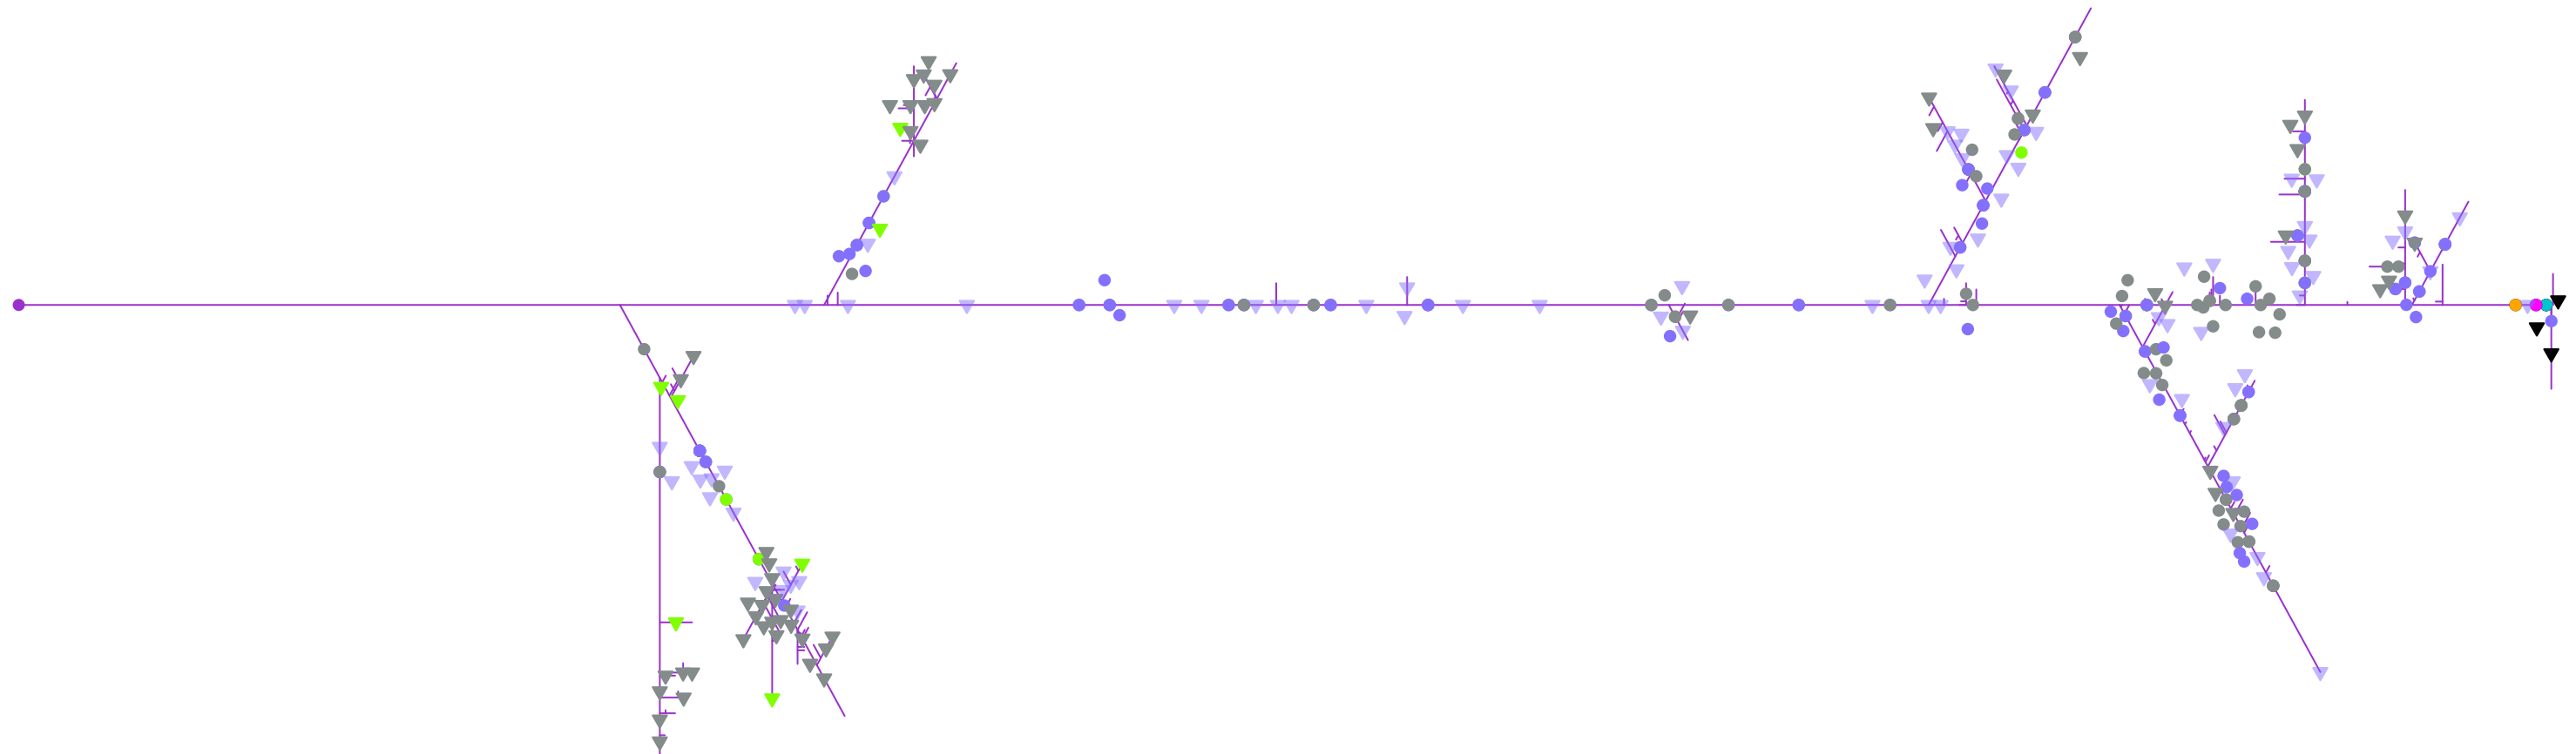

4 claw KC #12 (left)

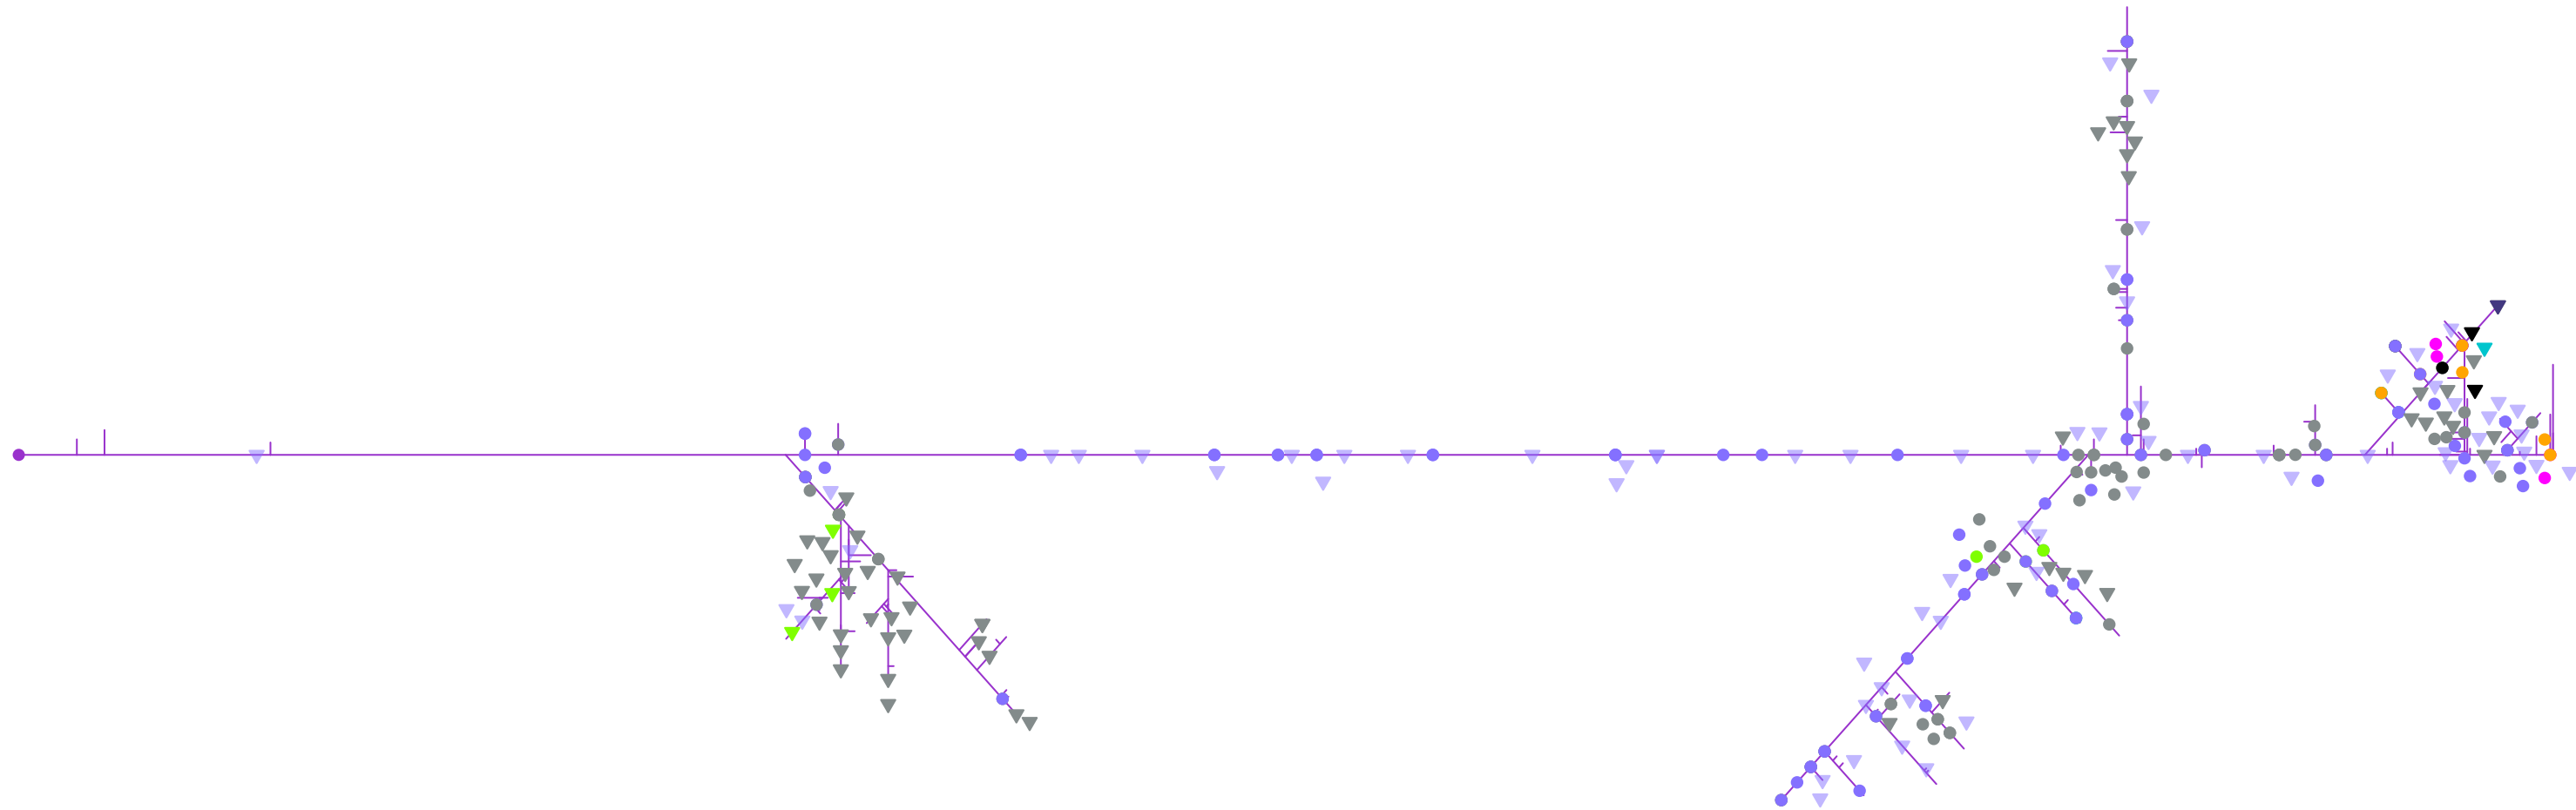



4 claw KC #13 (left)

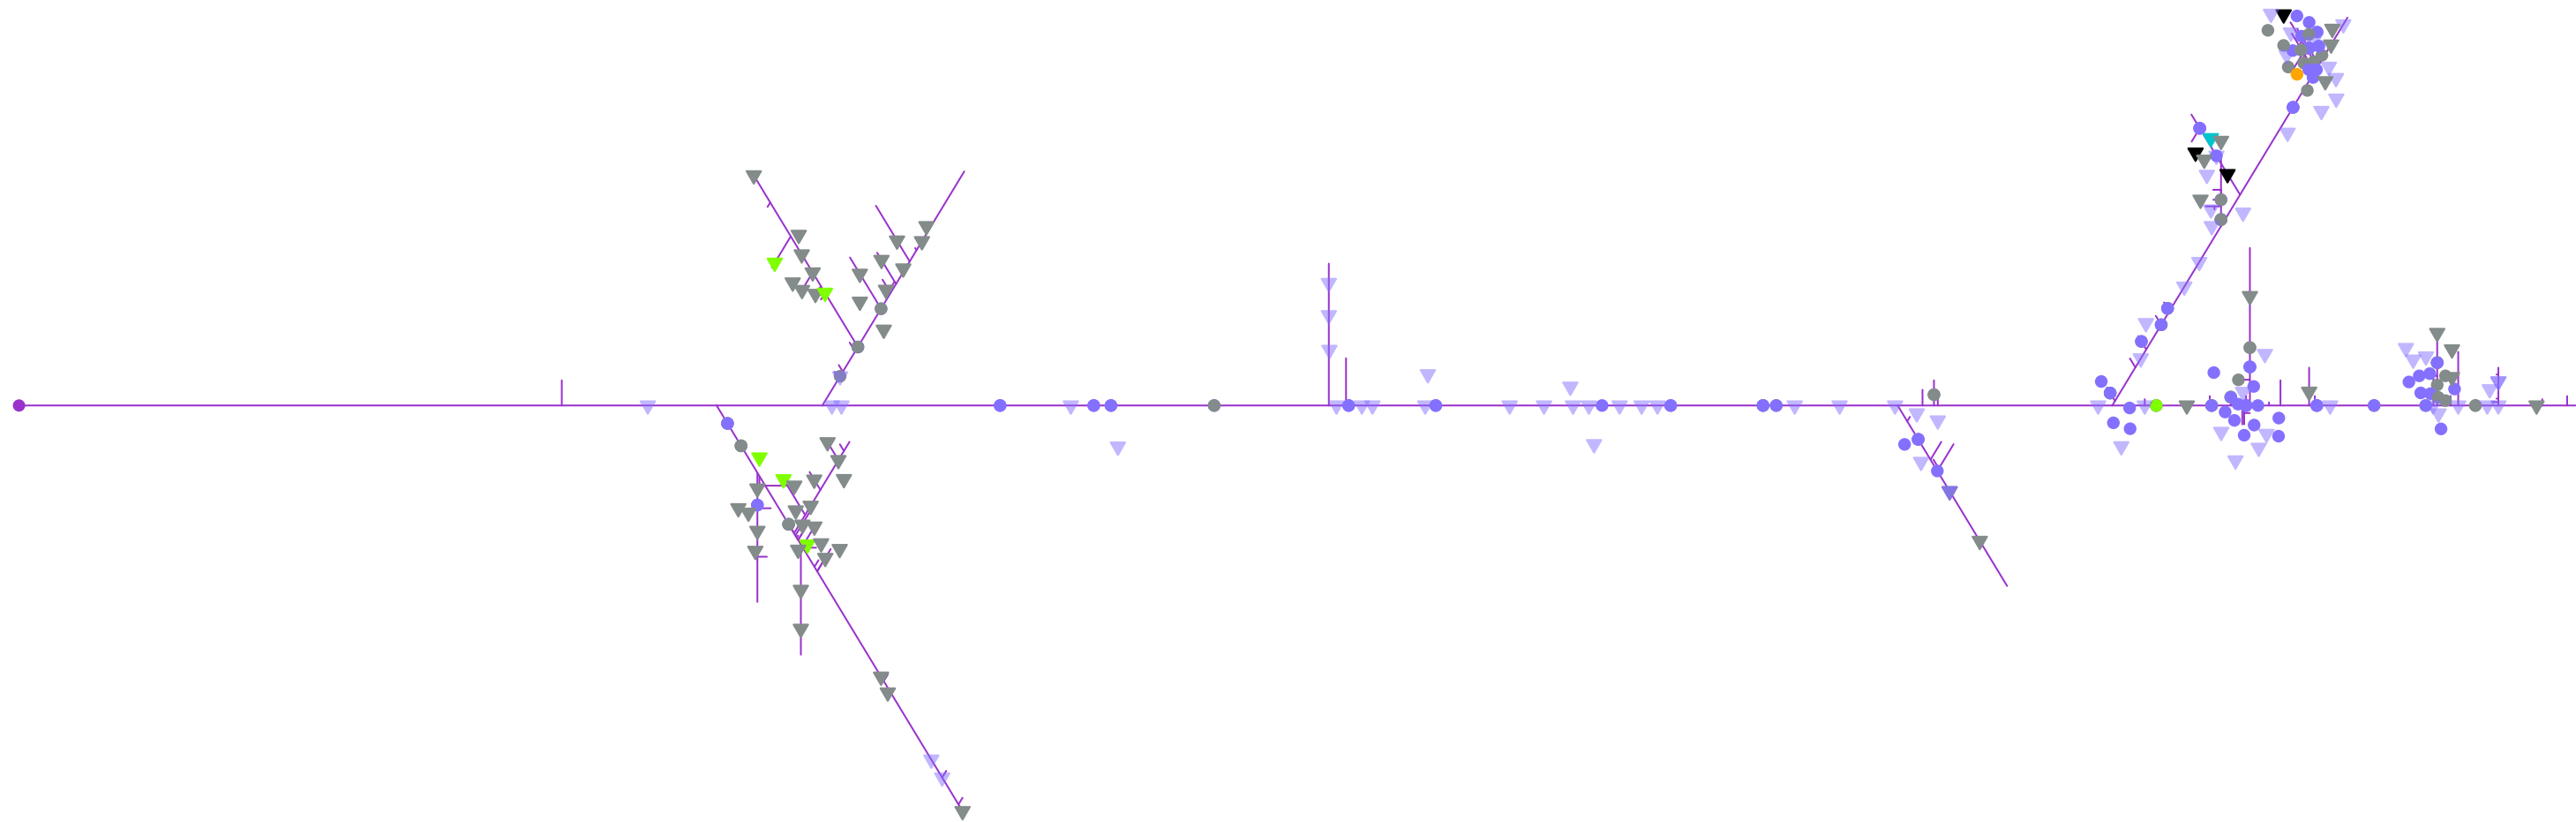

4 claw KC #14 (left)

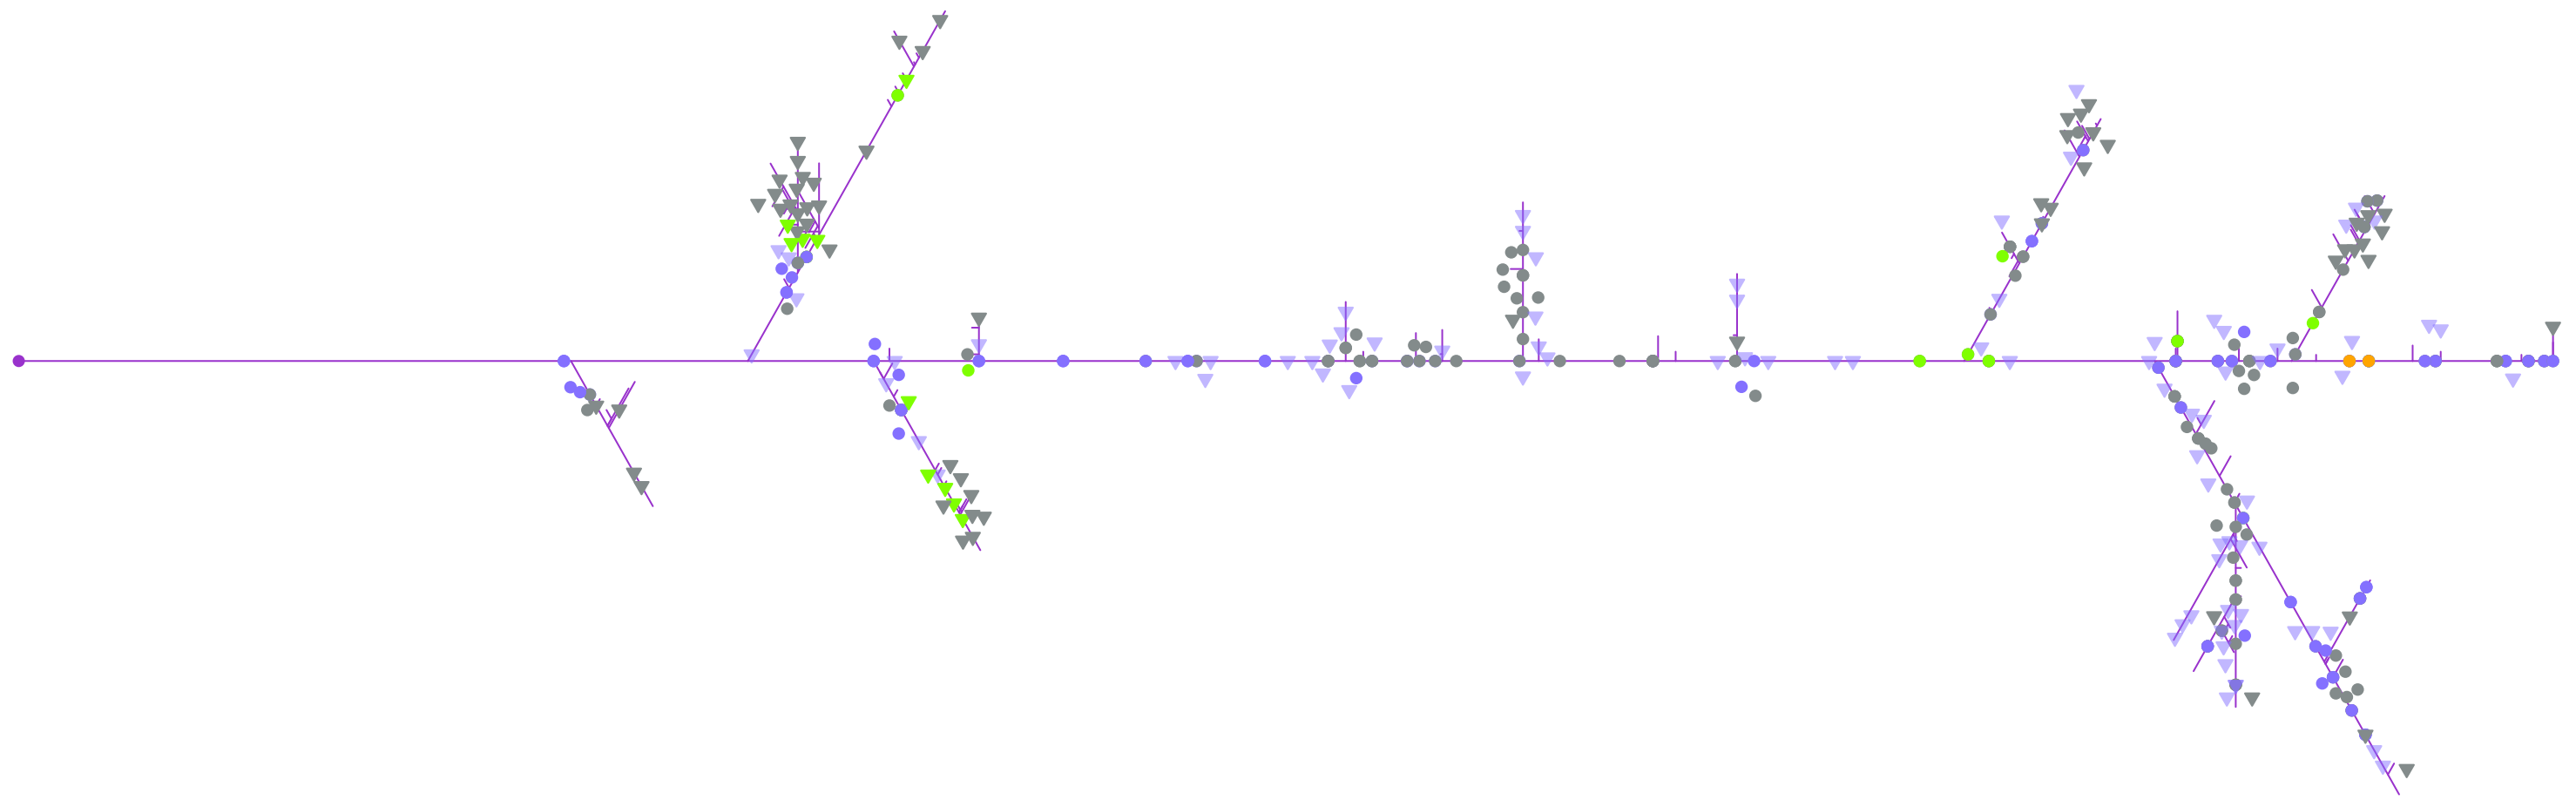

4 claw KC #15 (left)

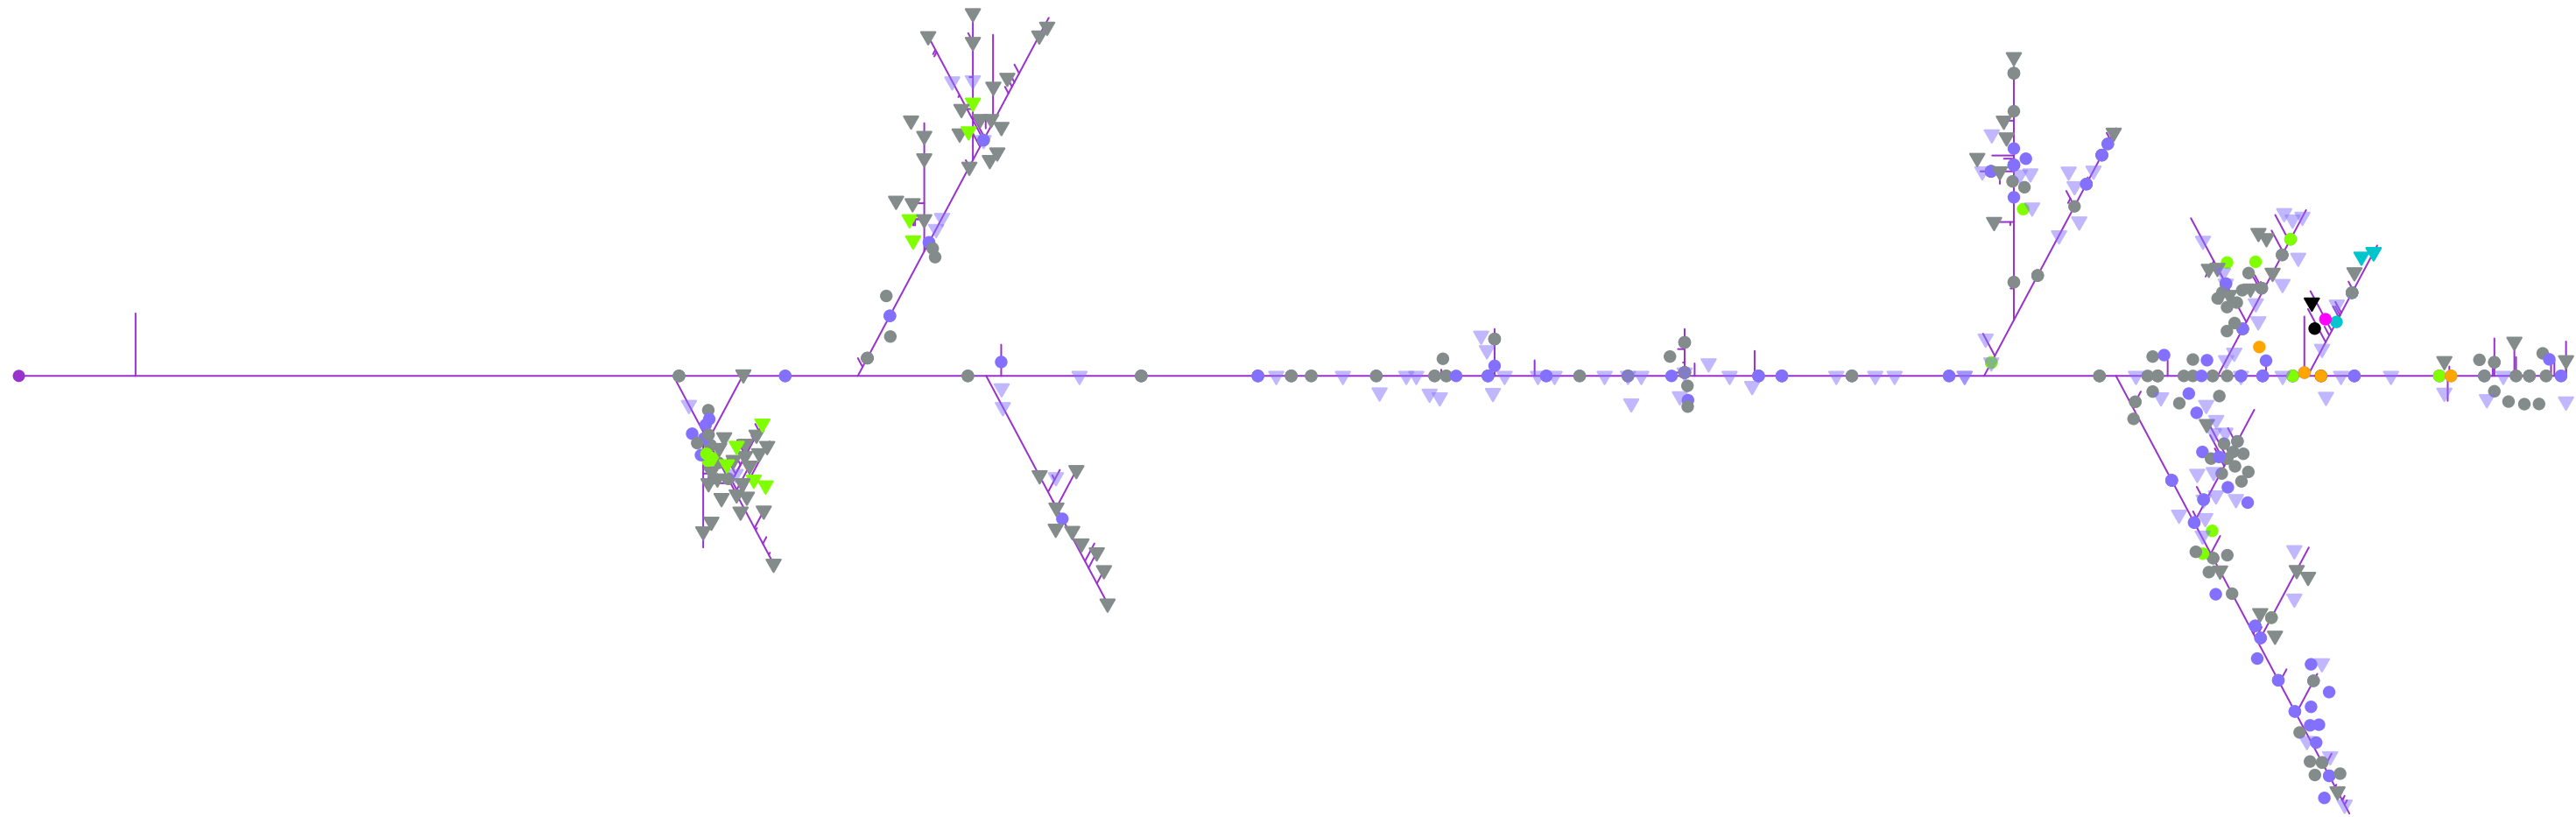

4 claw KC #16 (left)

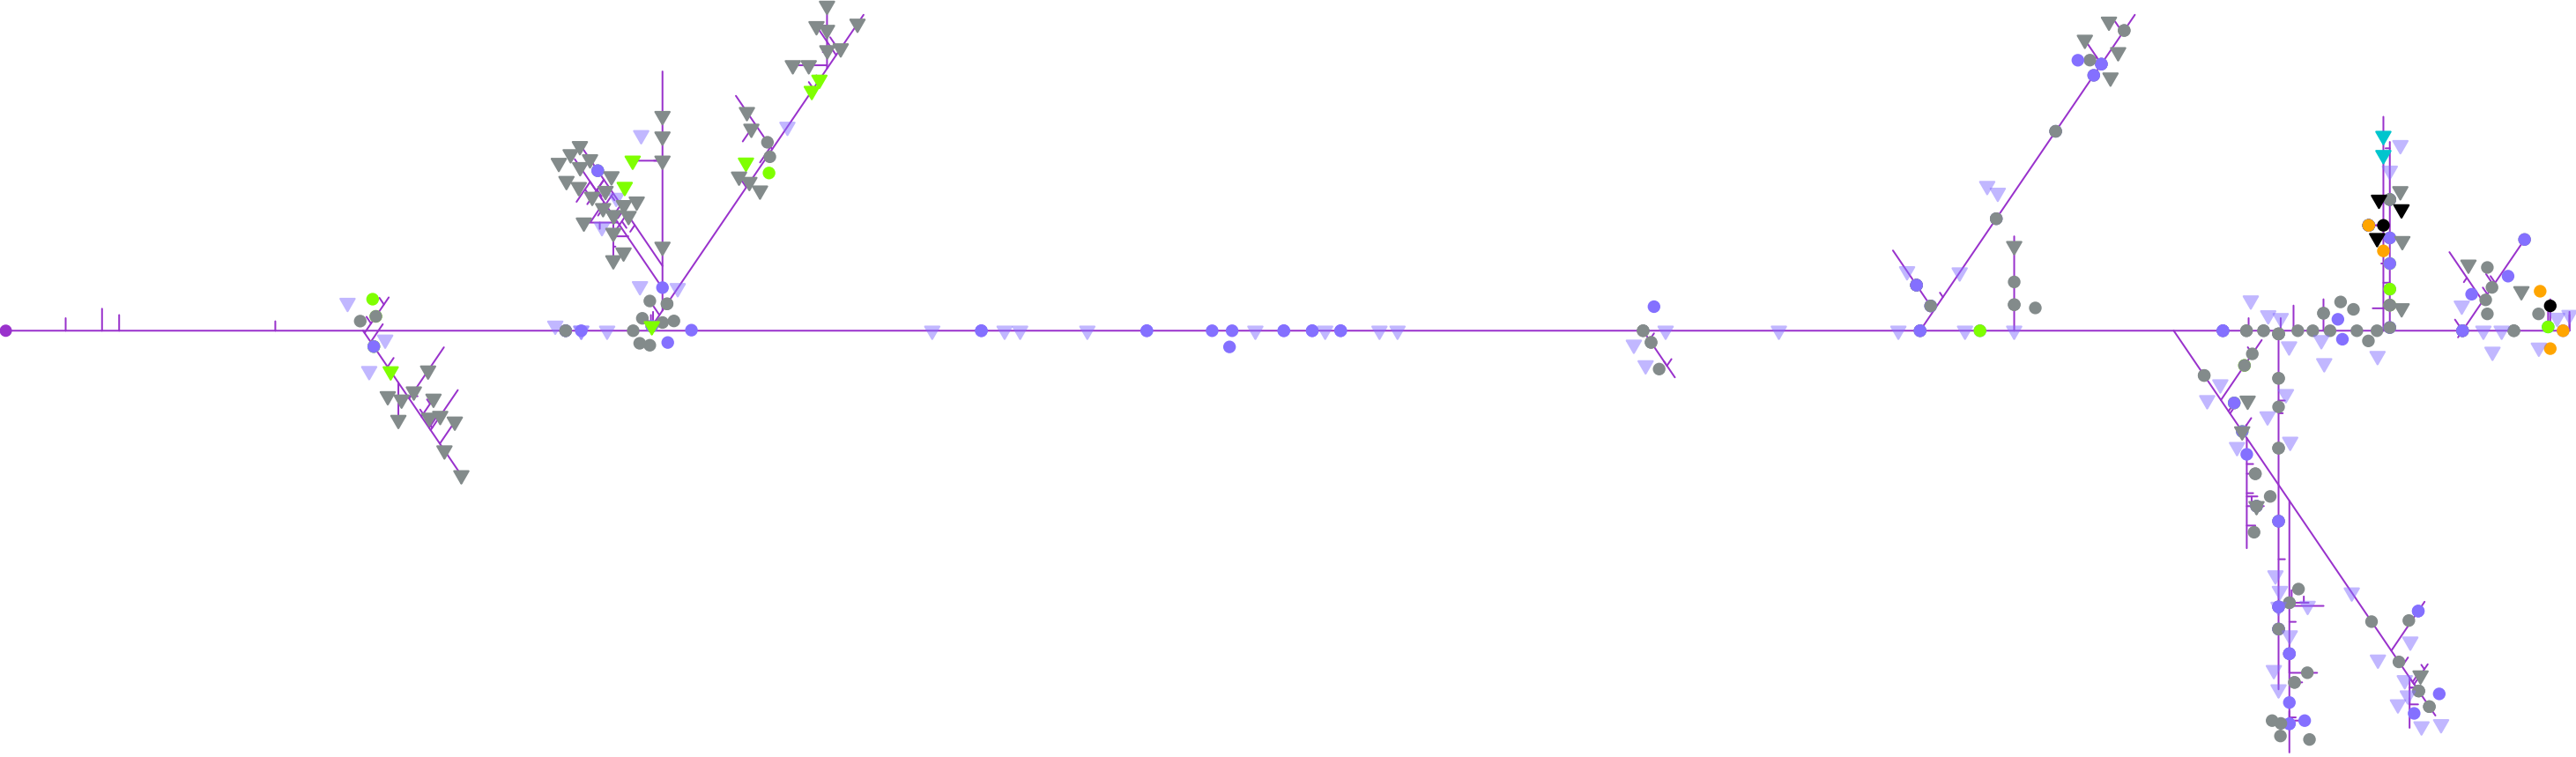

4 claw KC #17 (left)

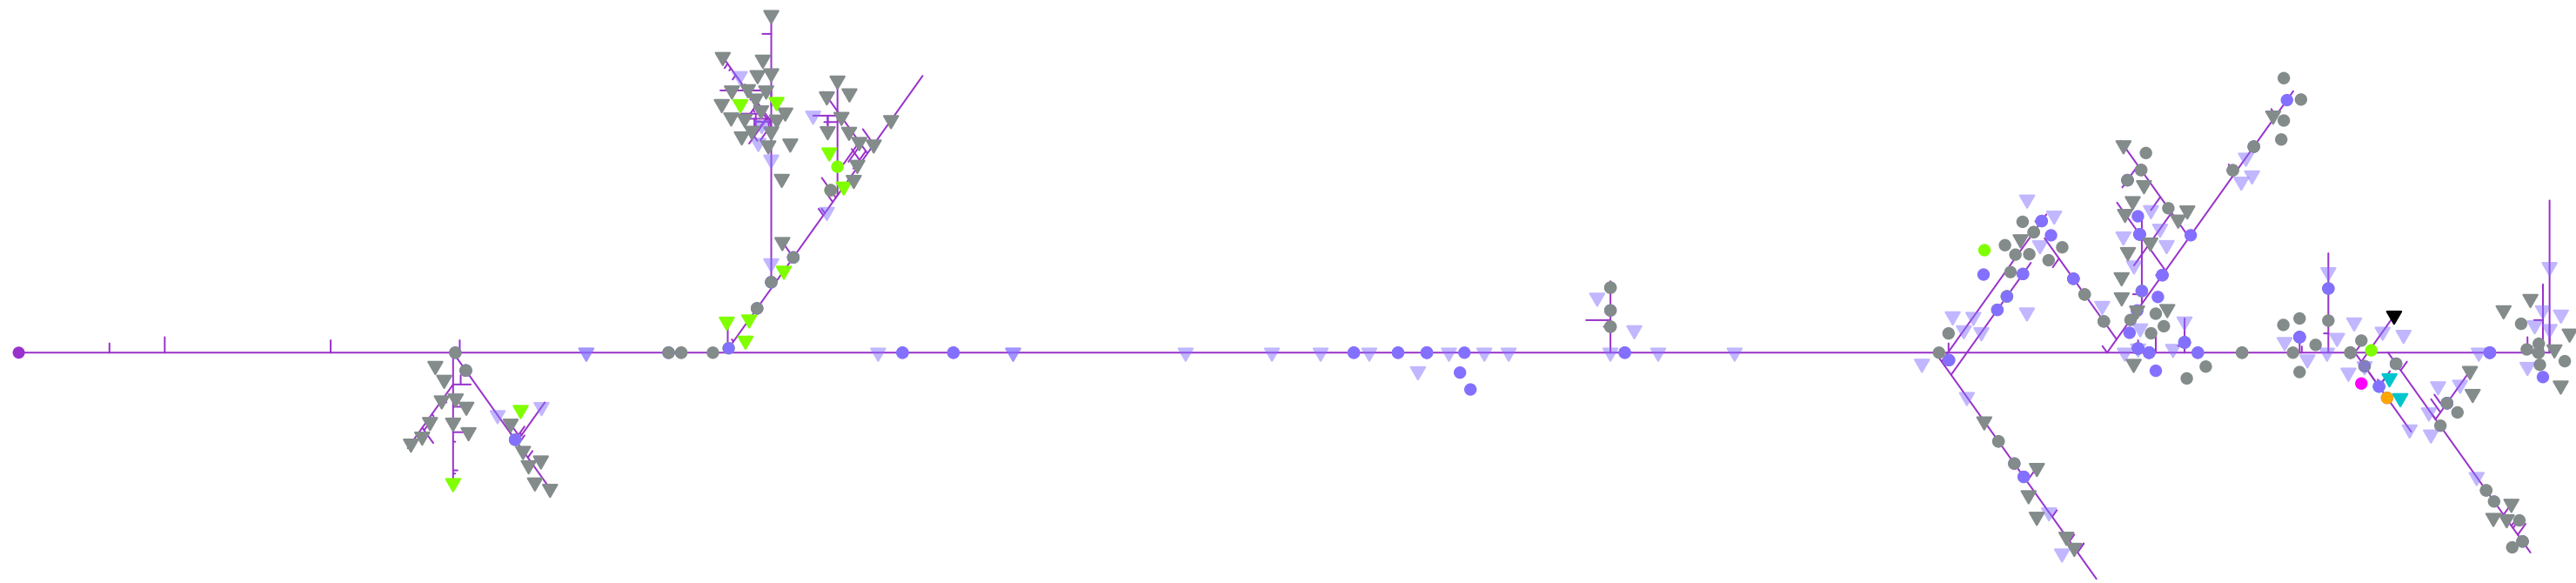

4 claw KC #18 (left)

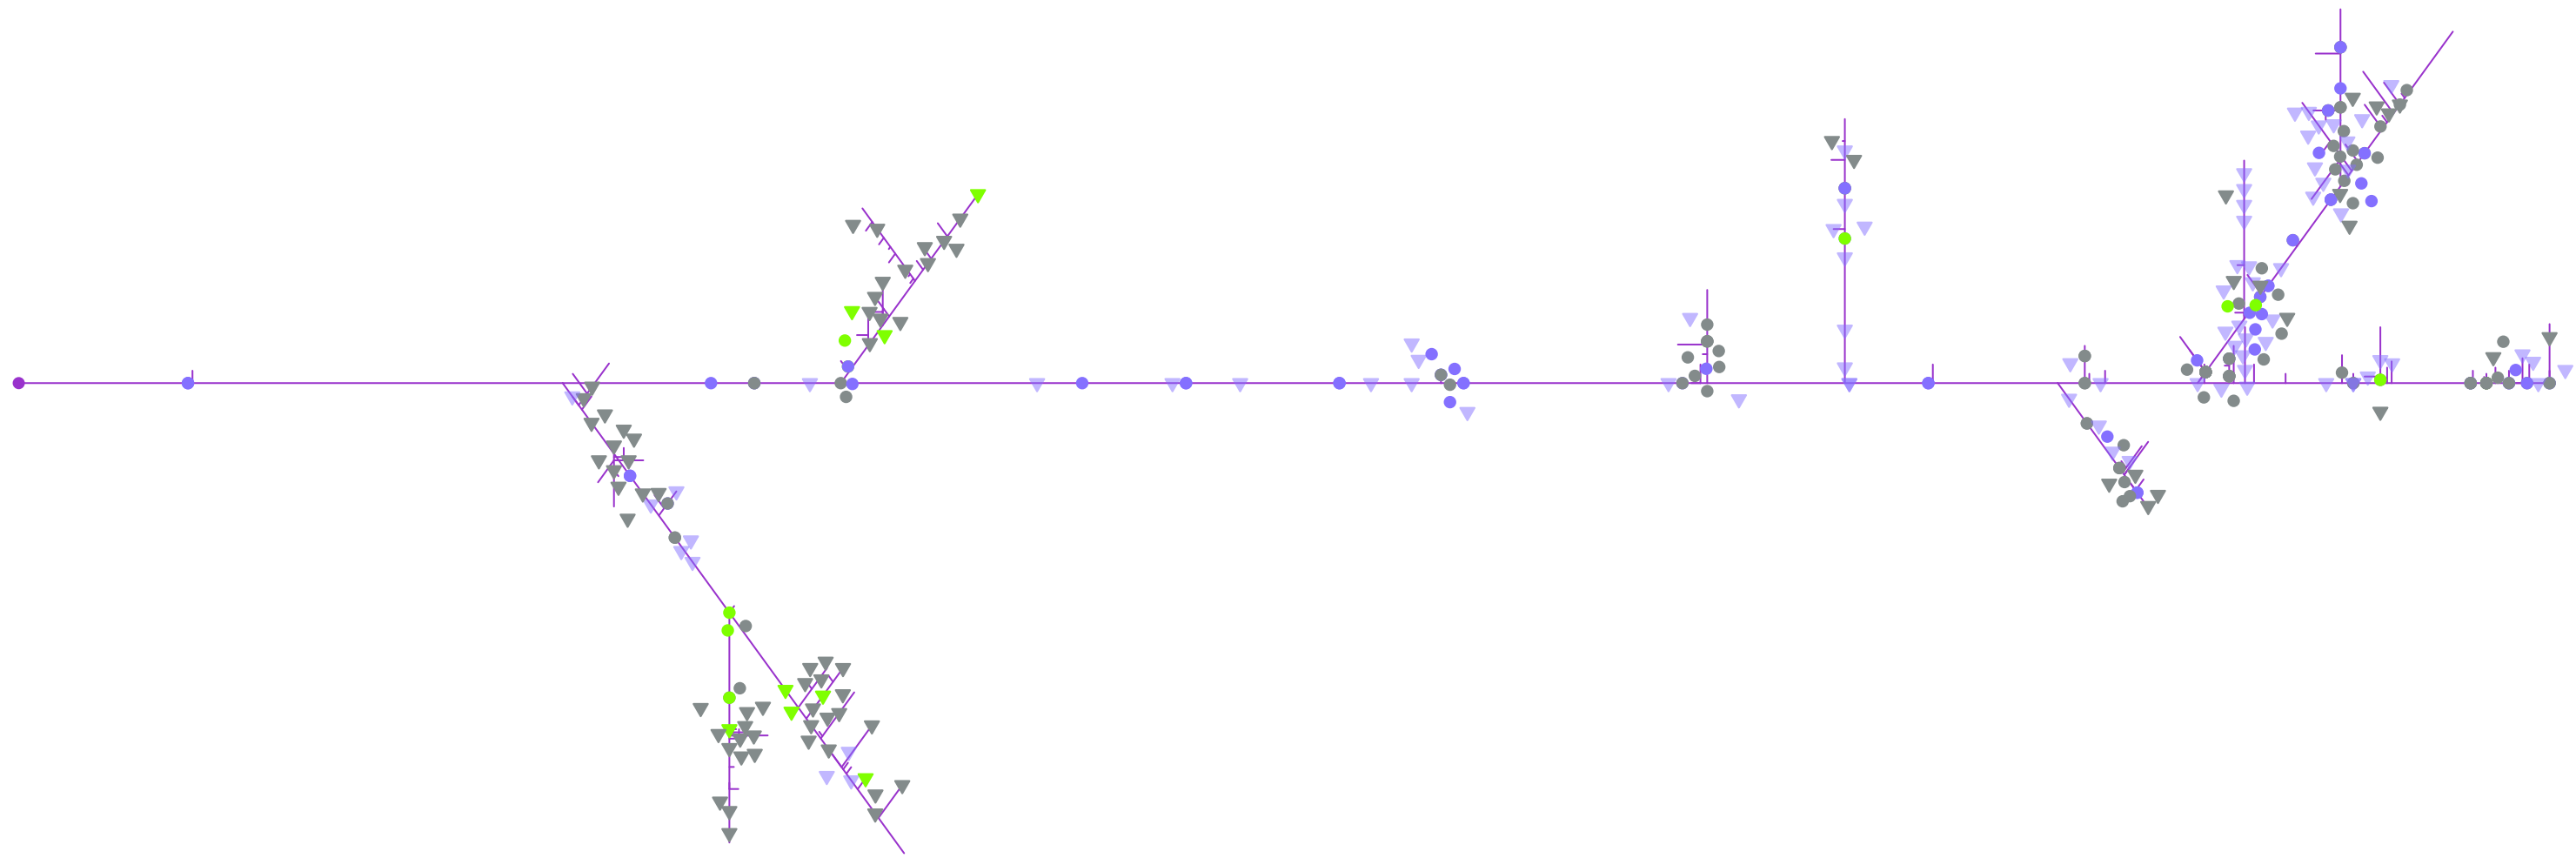

4 claw KC #19 (left)

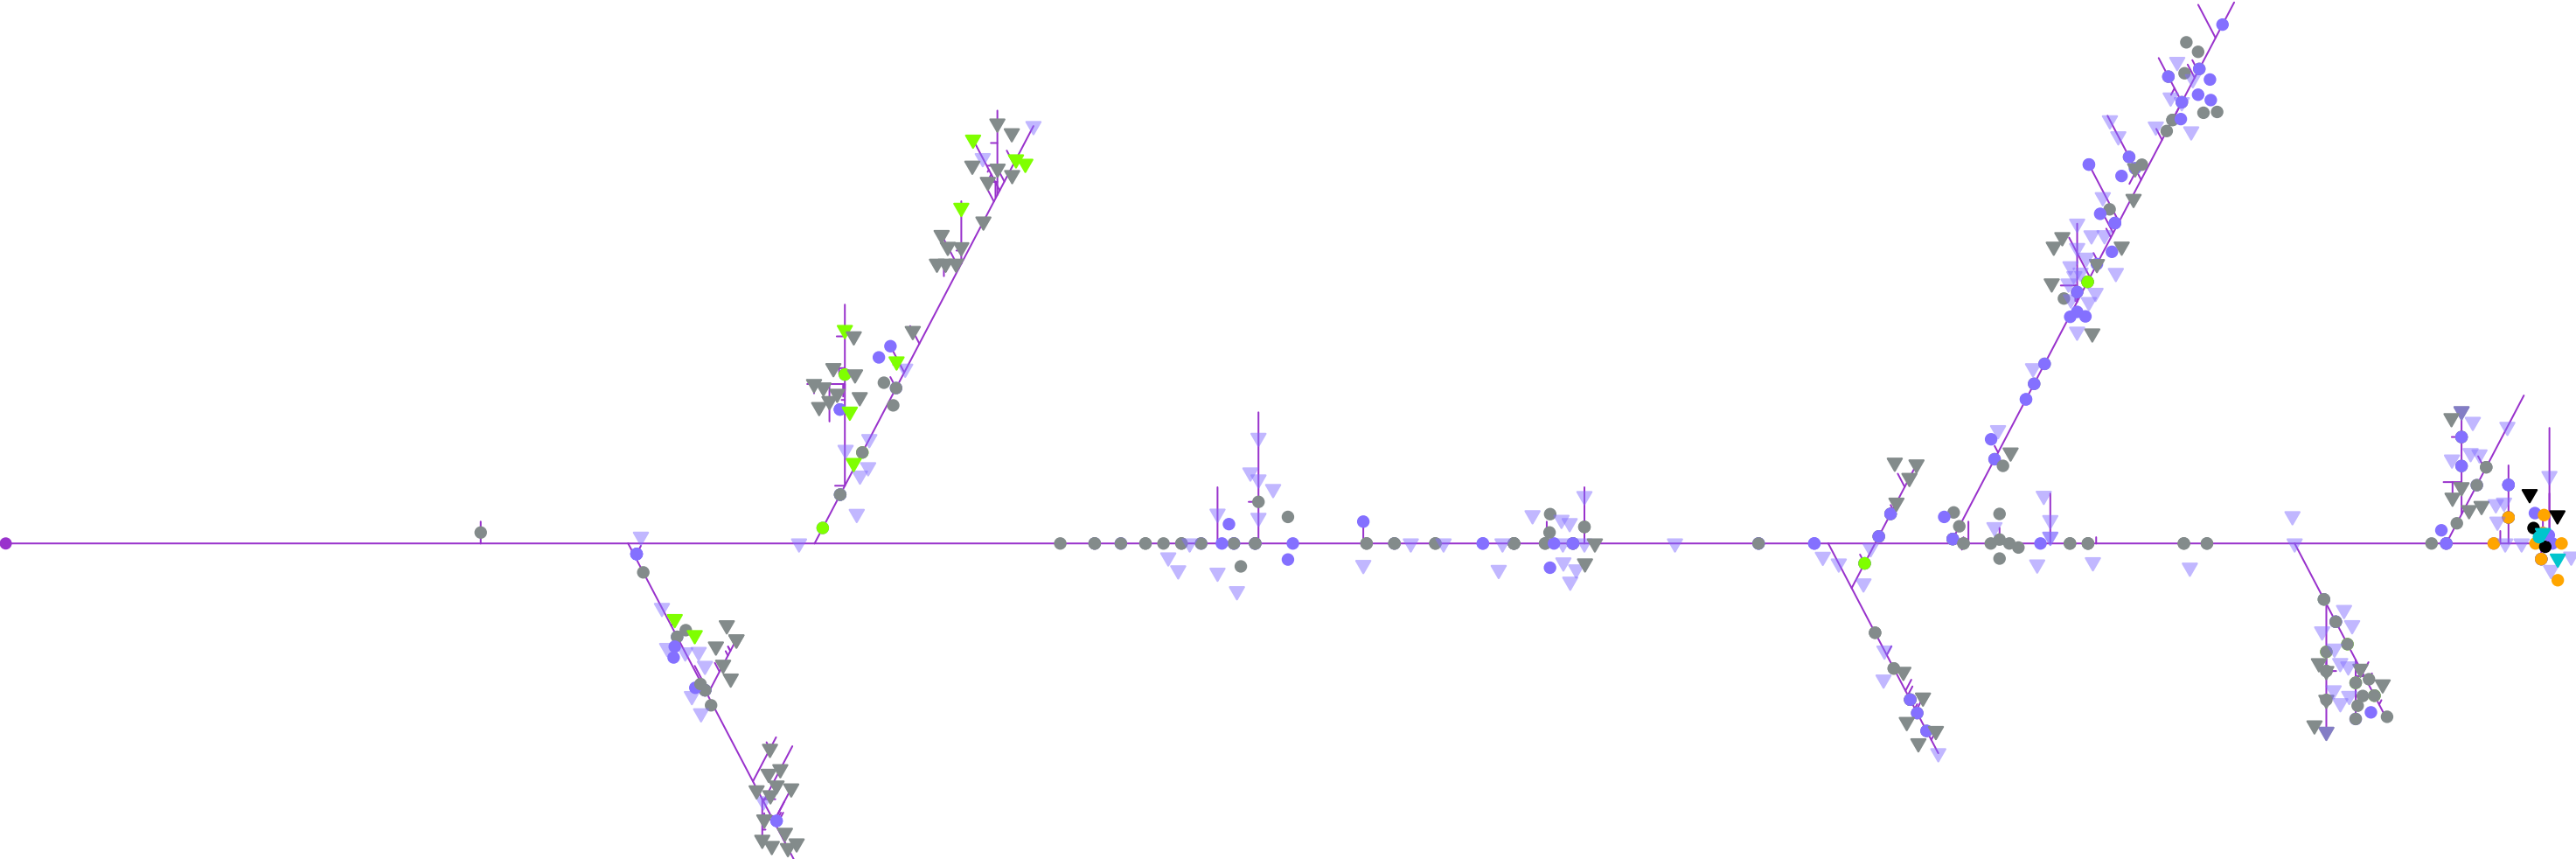

5 claw KC #1 (left)

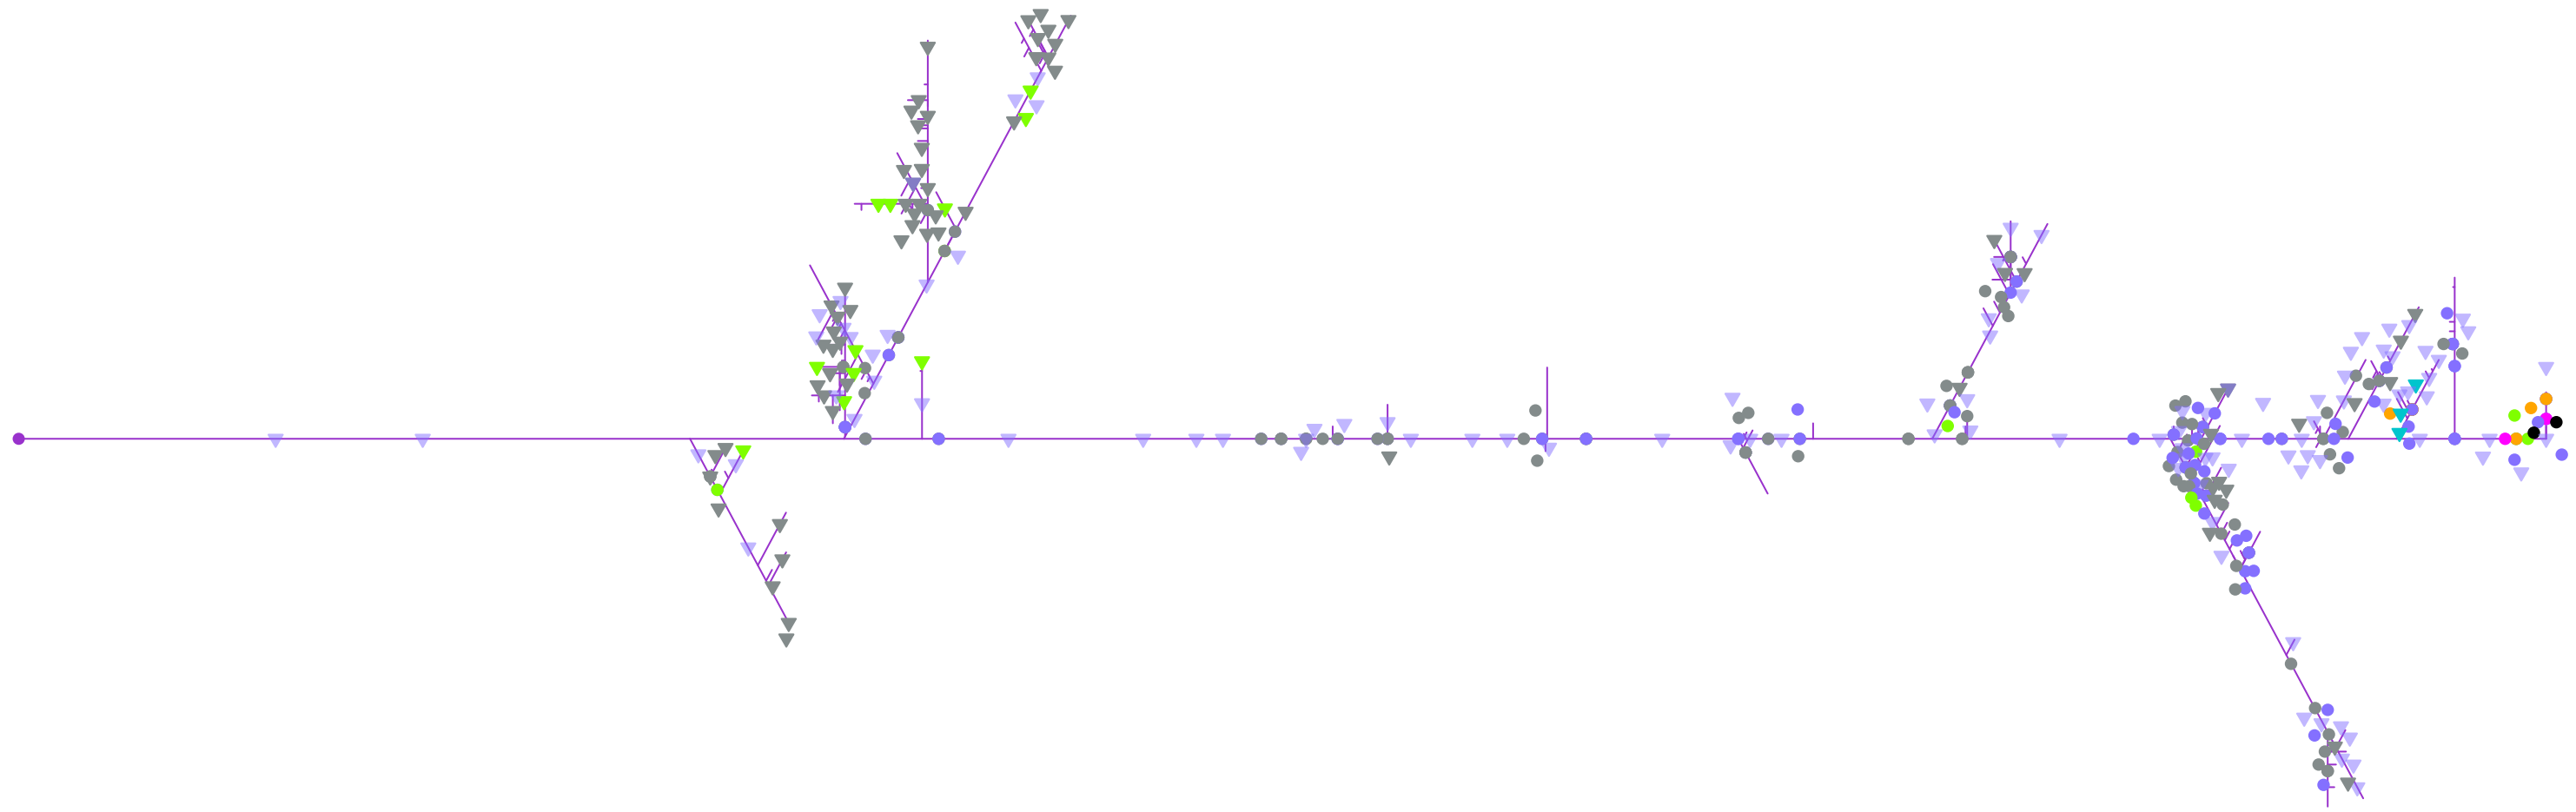



5 claw KC #2 (left)

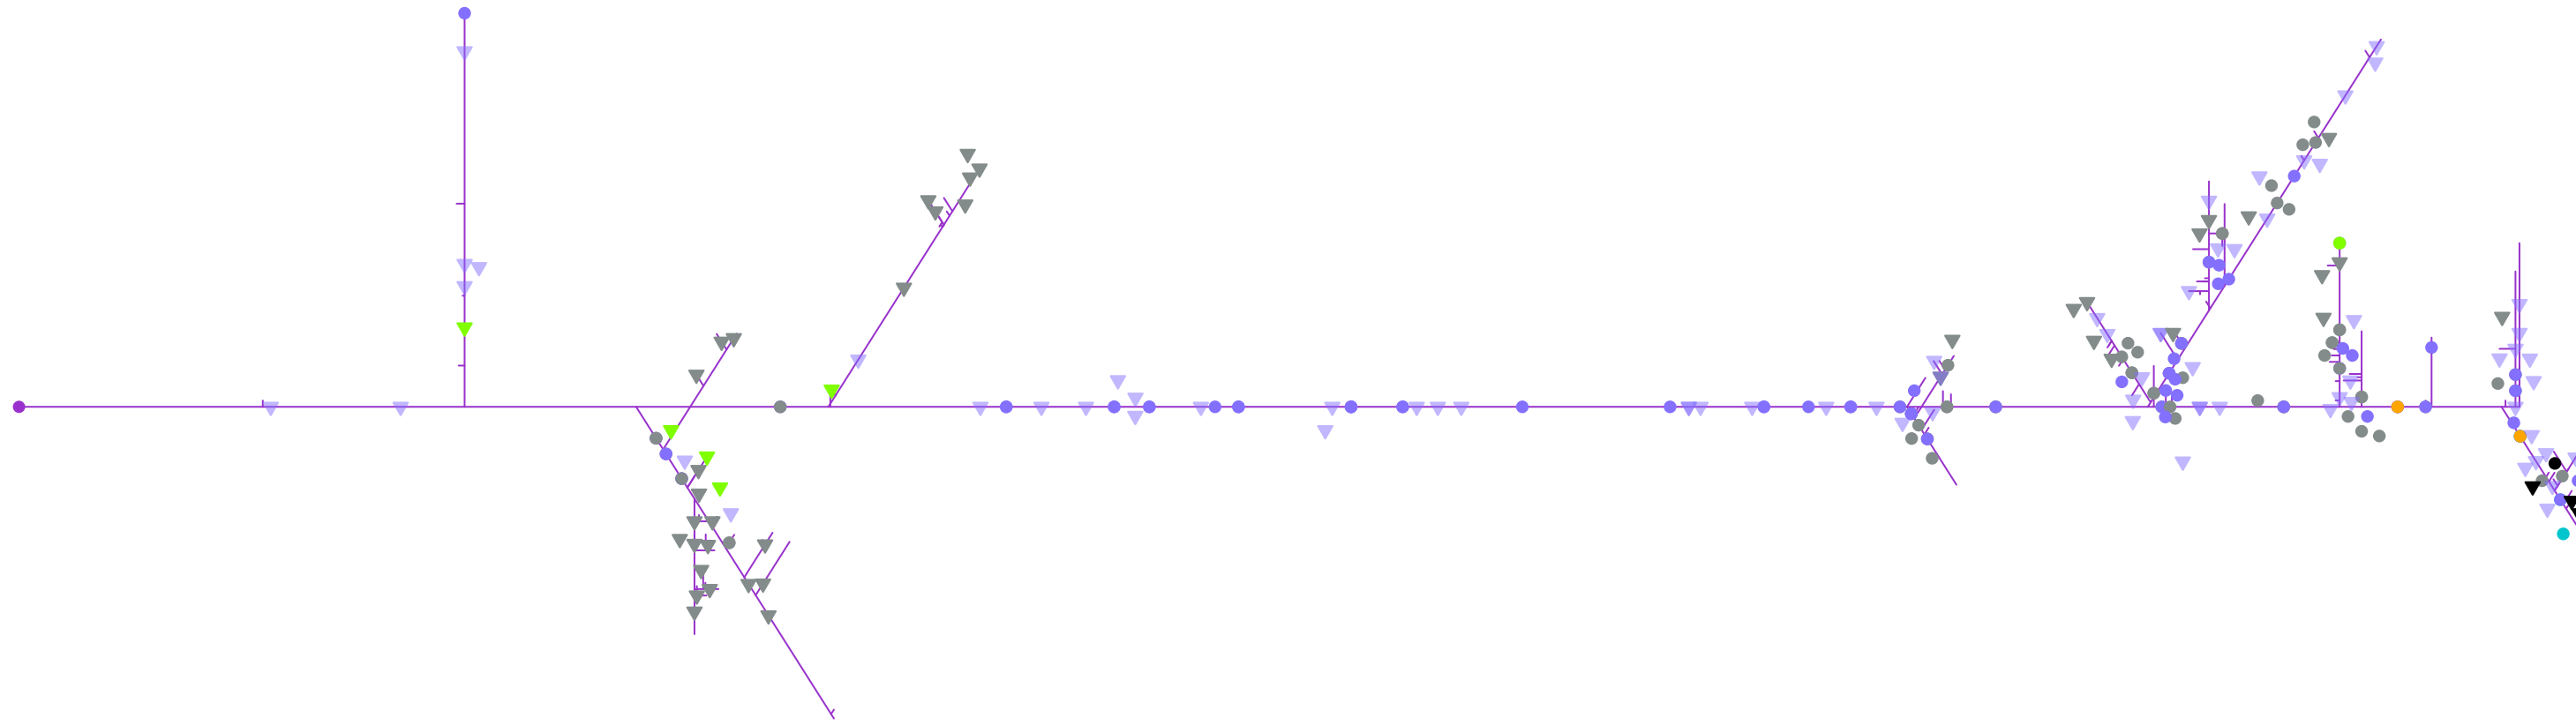

5 claw KC #3 (left)

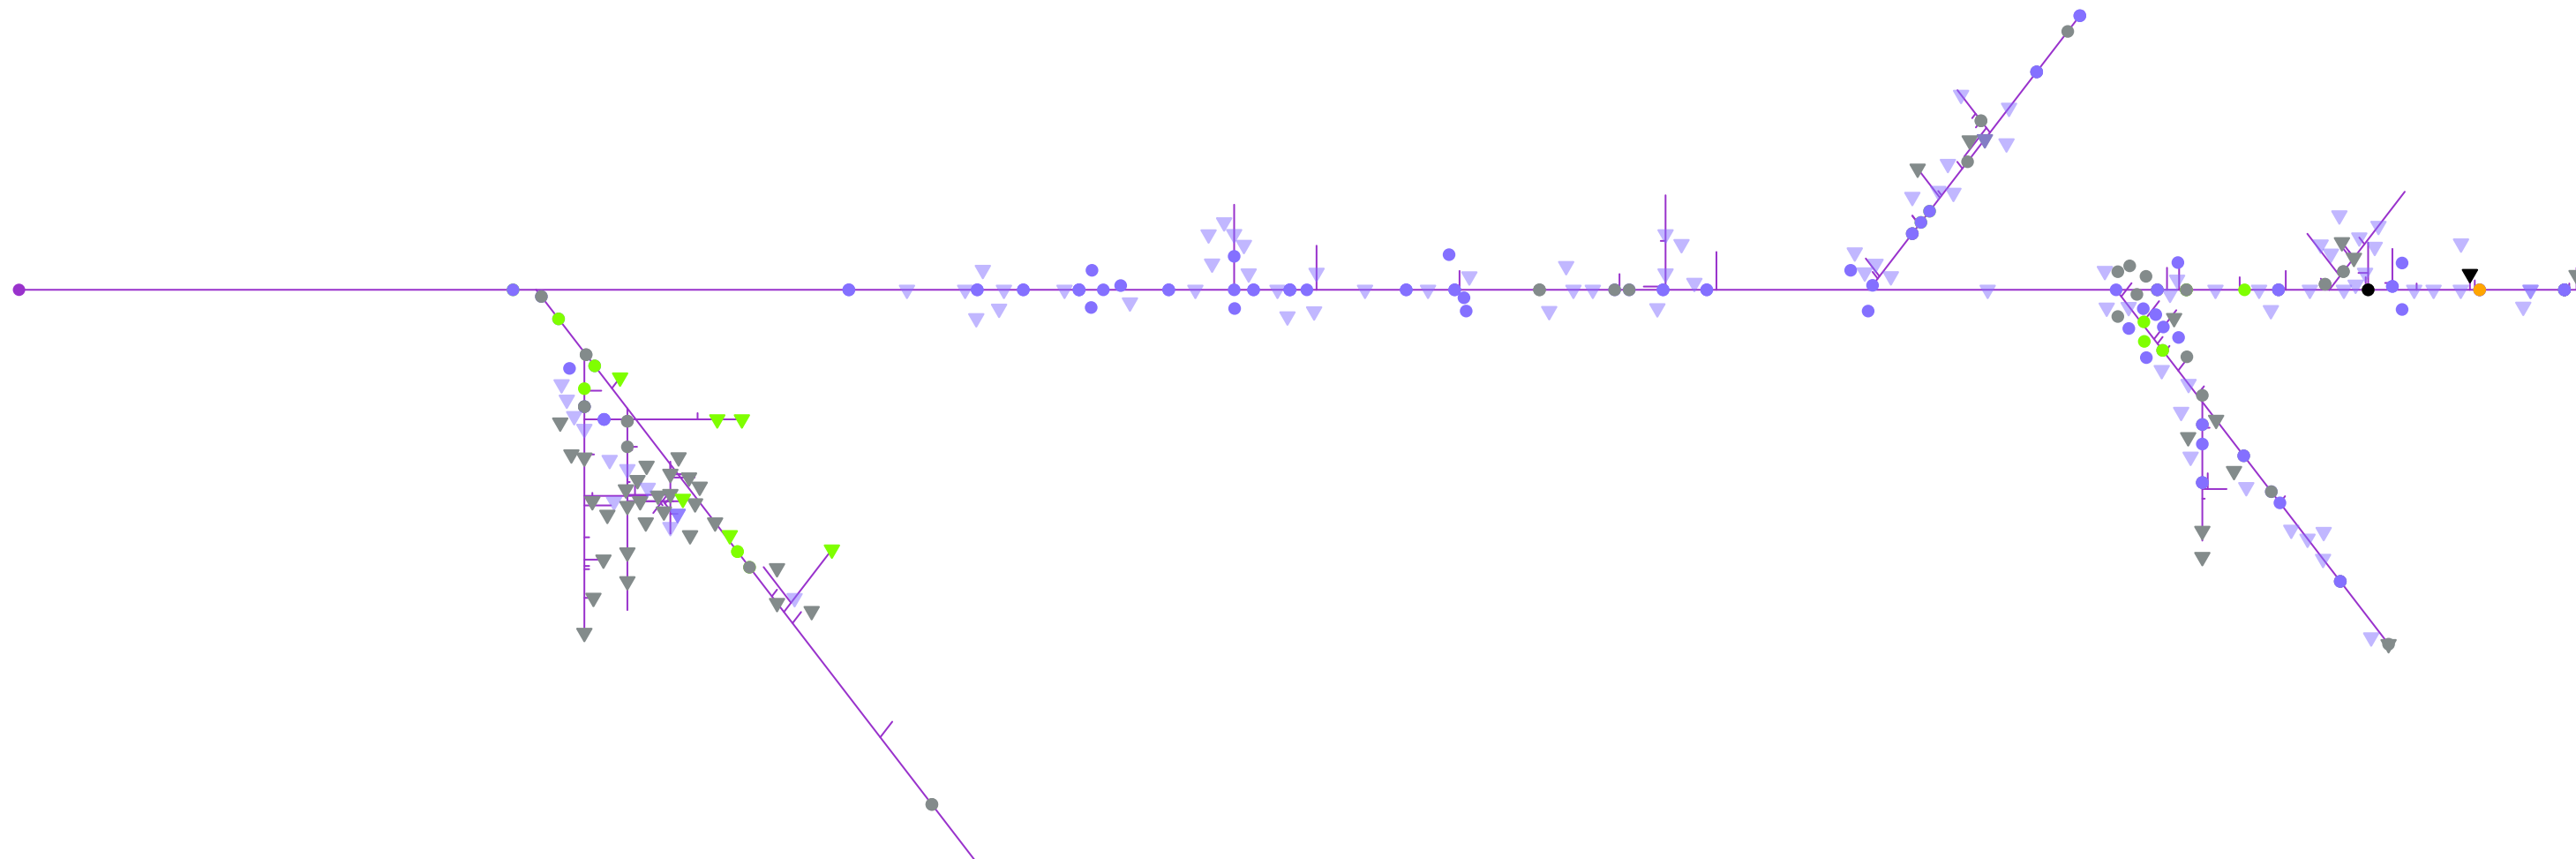



5 claw KC #5 (left)

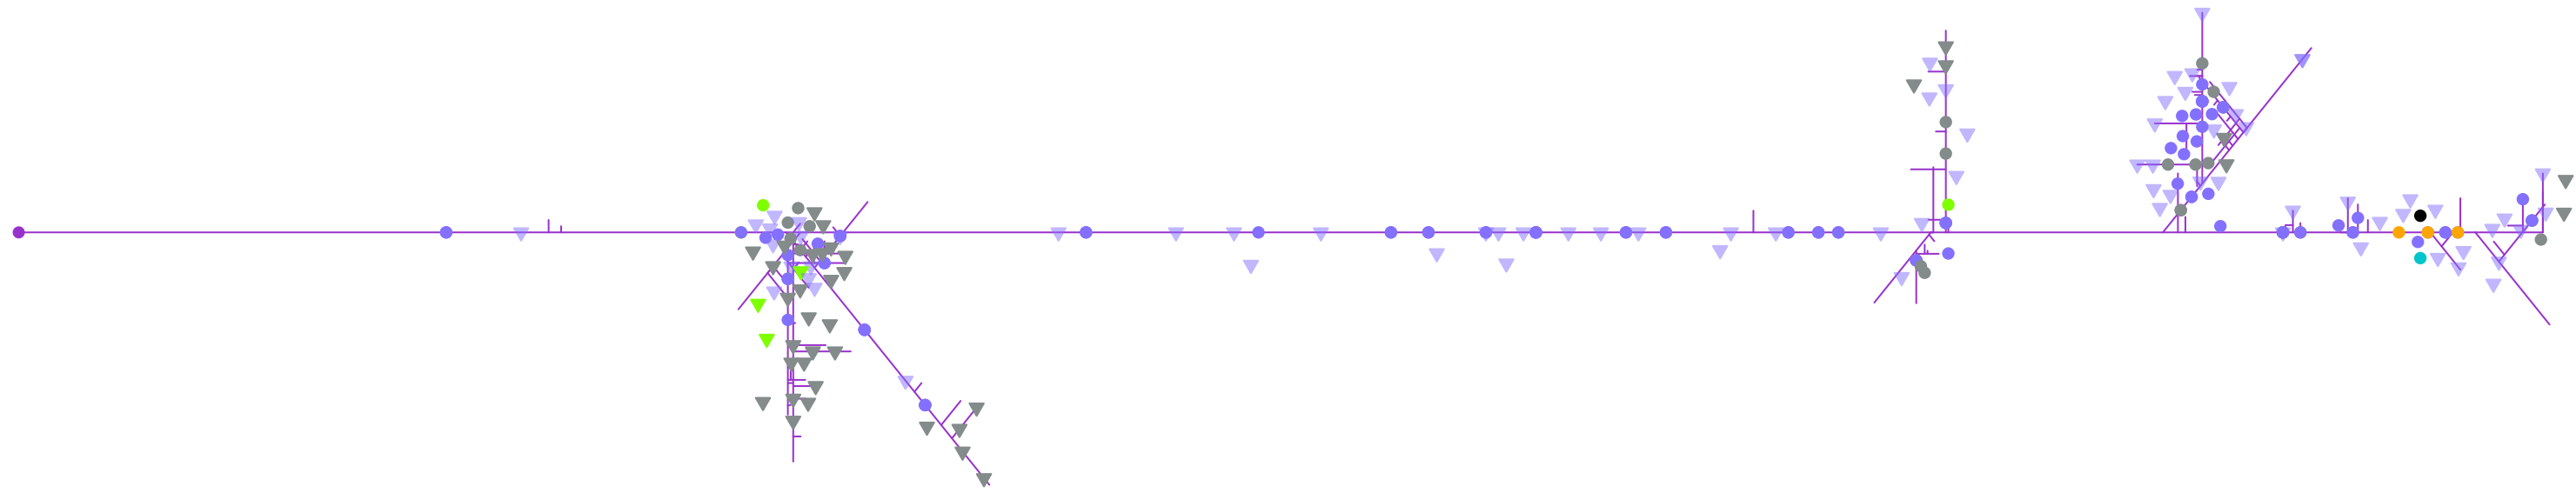

5 claw KC #6 (left)

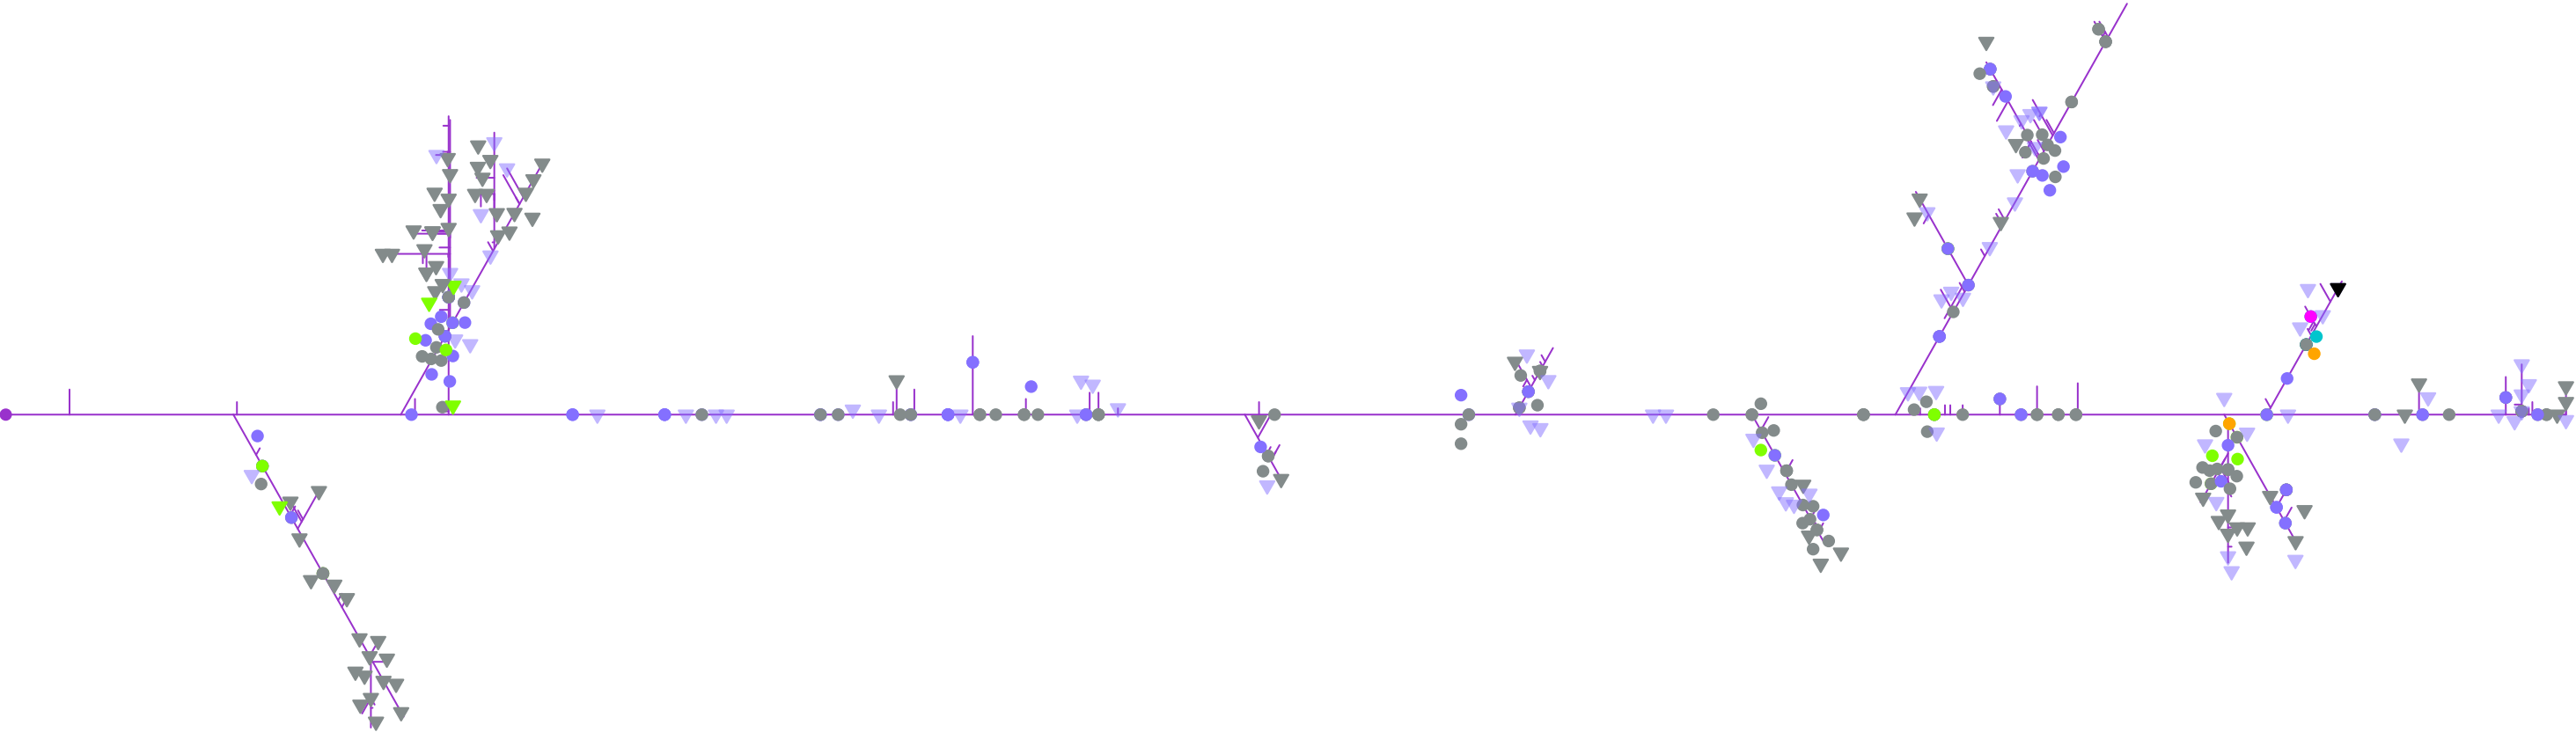

5 claw KC #7 (left)

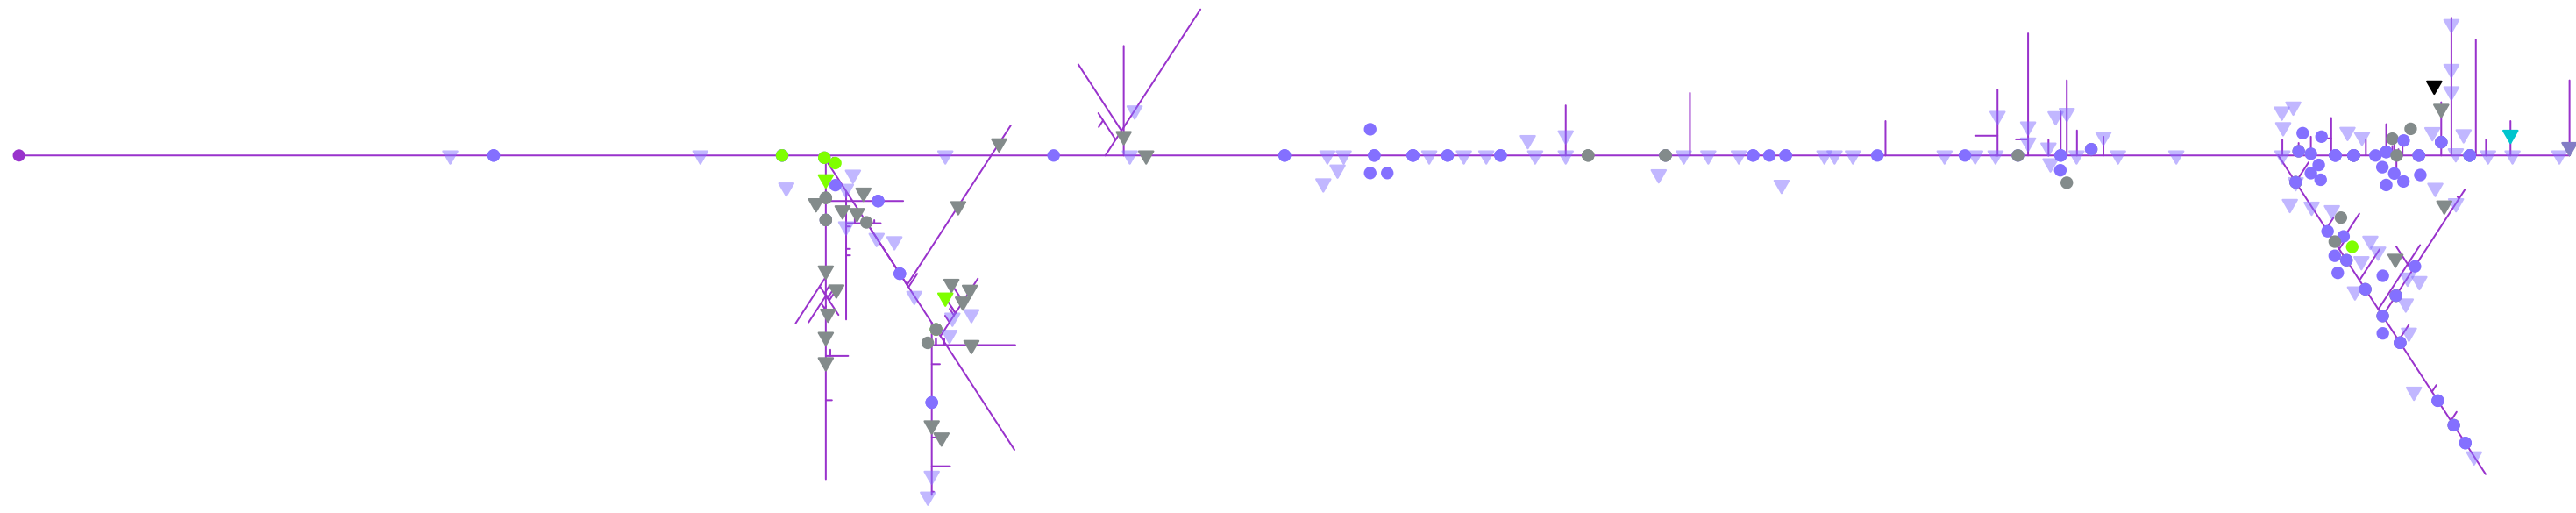

6 claw KC #1 (left)

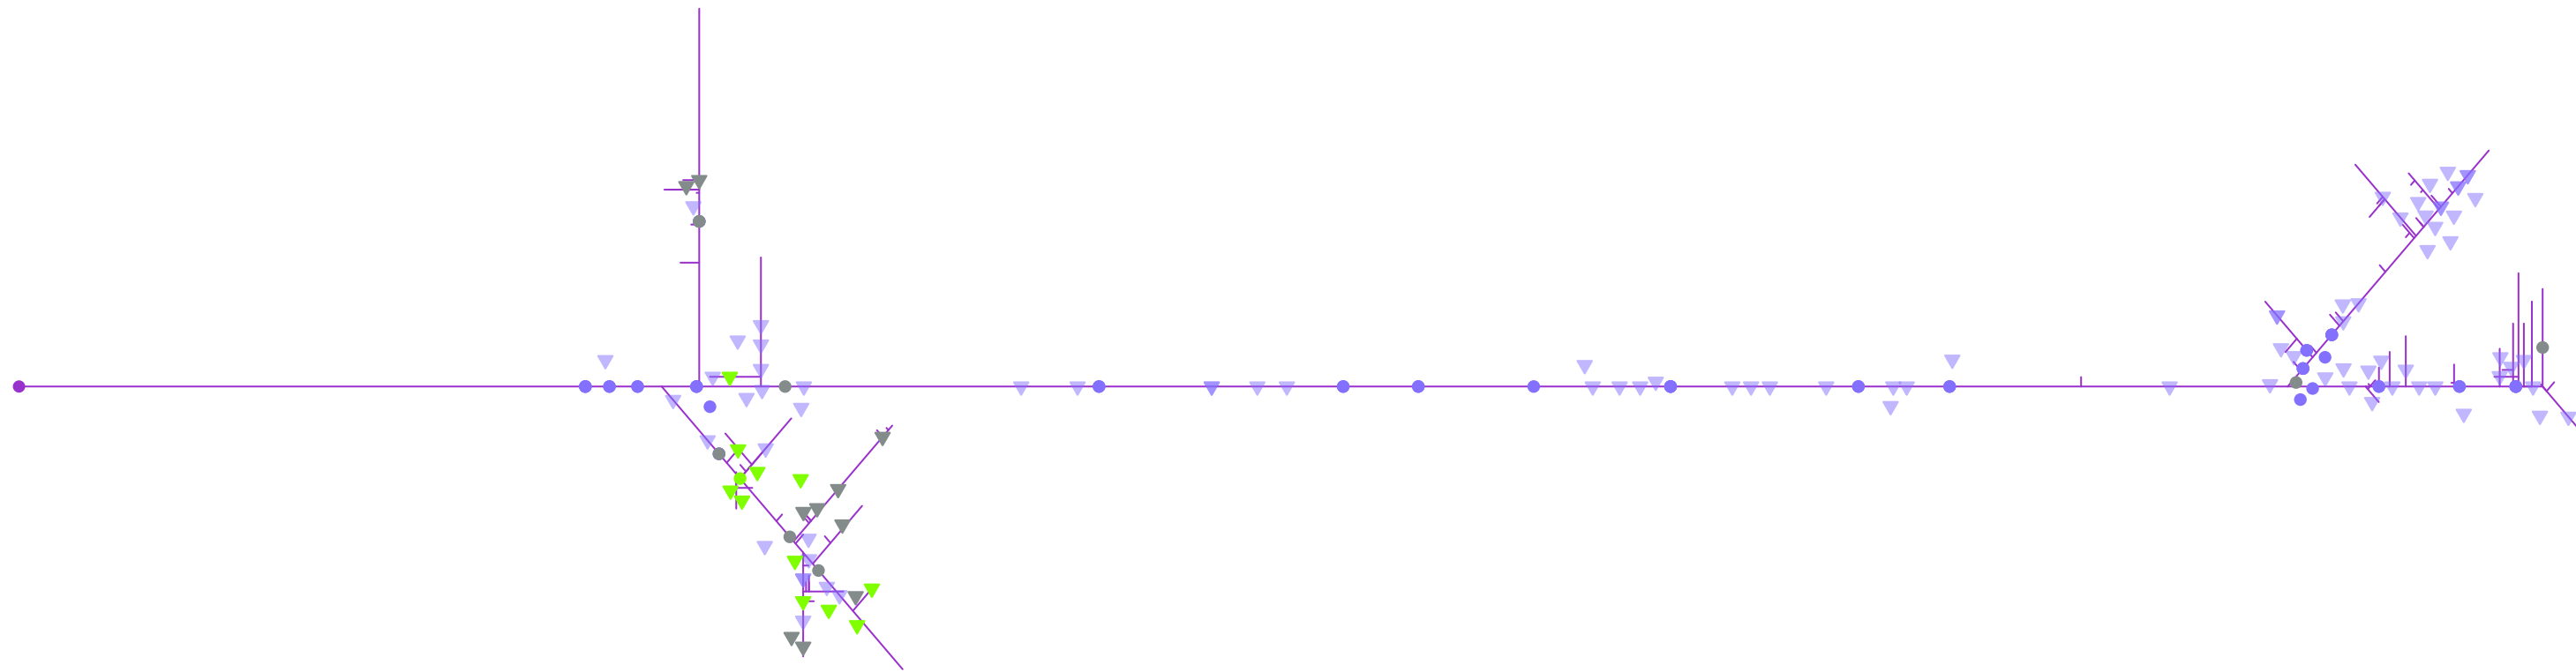

6 claw KC #2 (left)

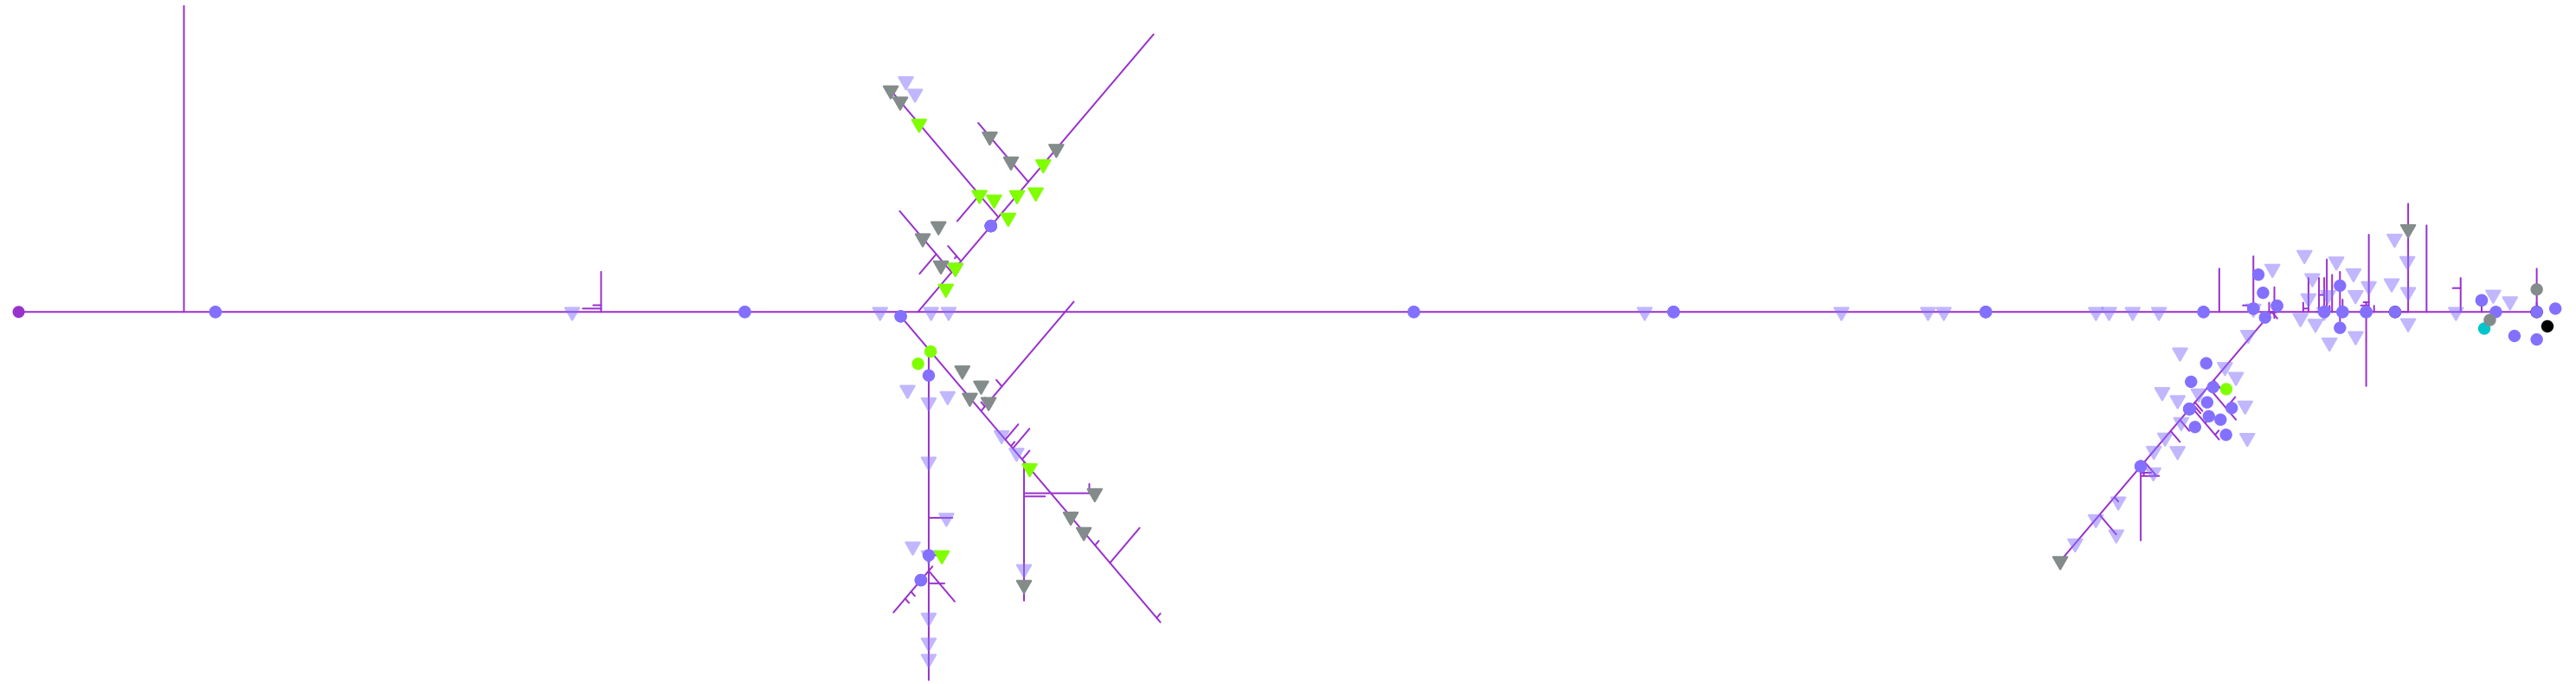



6 claw KC #3 (left)

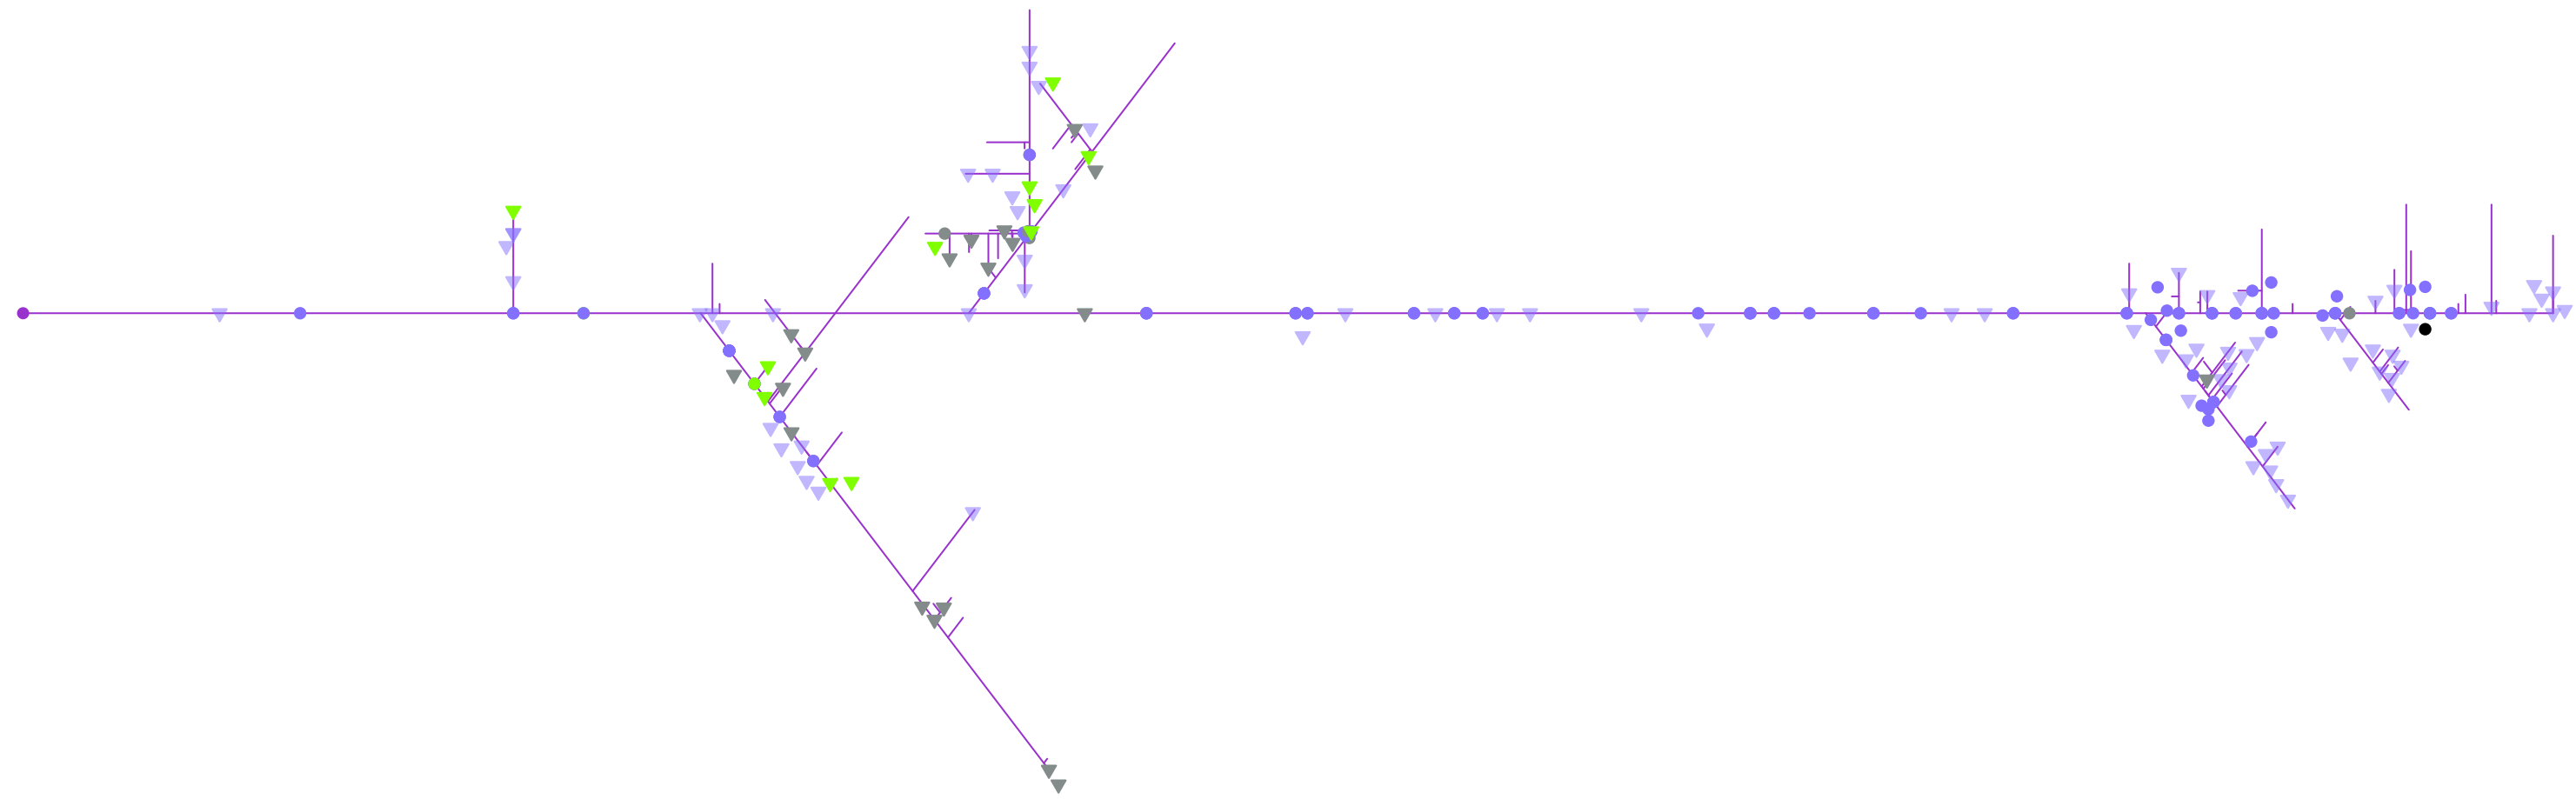

6 claw KC #4 (left)

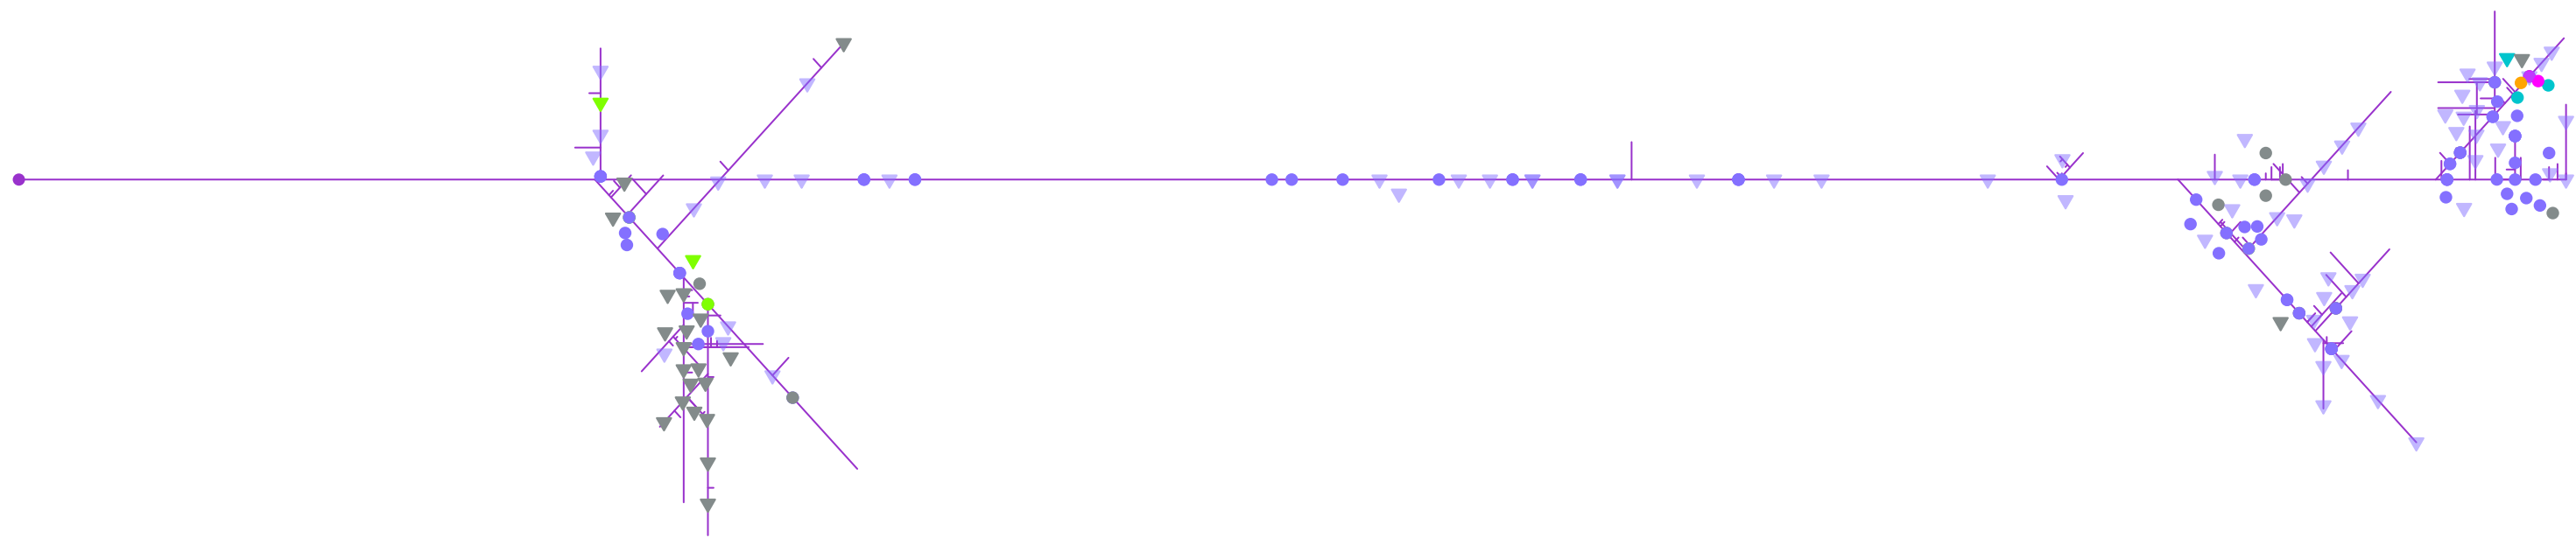

1 claw KC #1 (right)

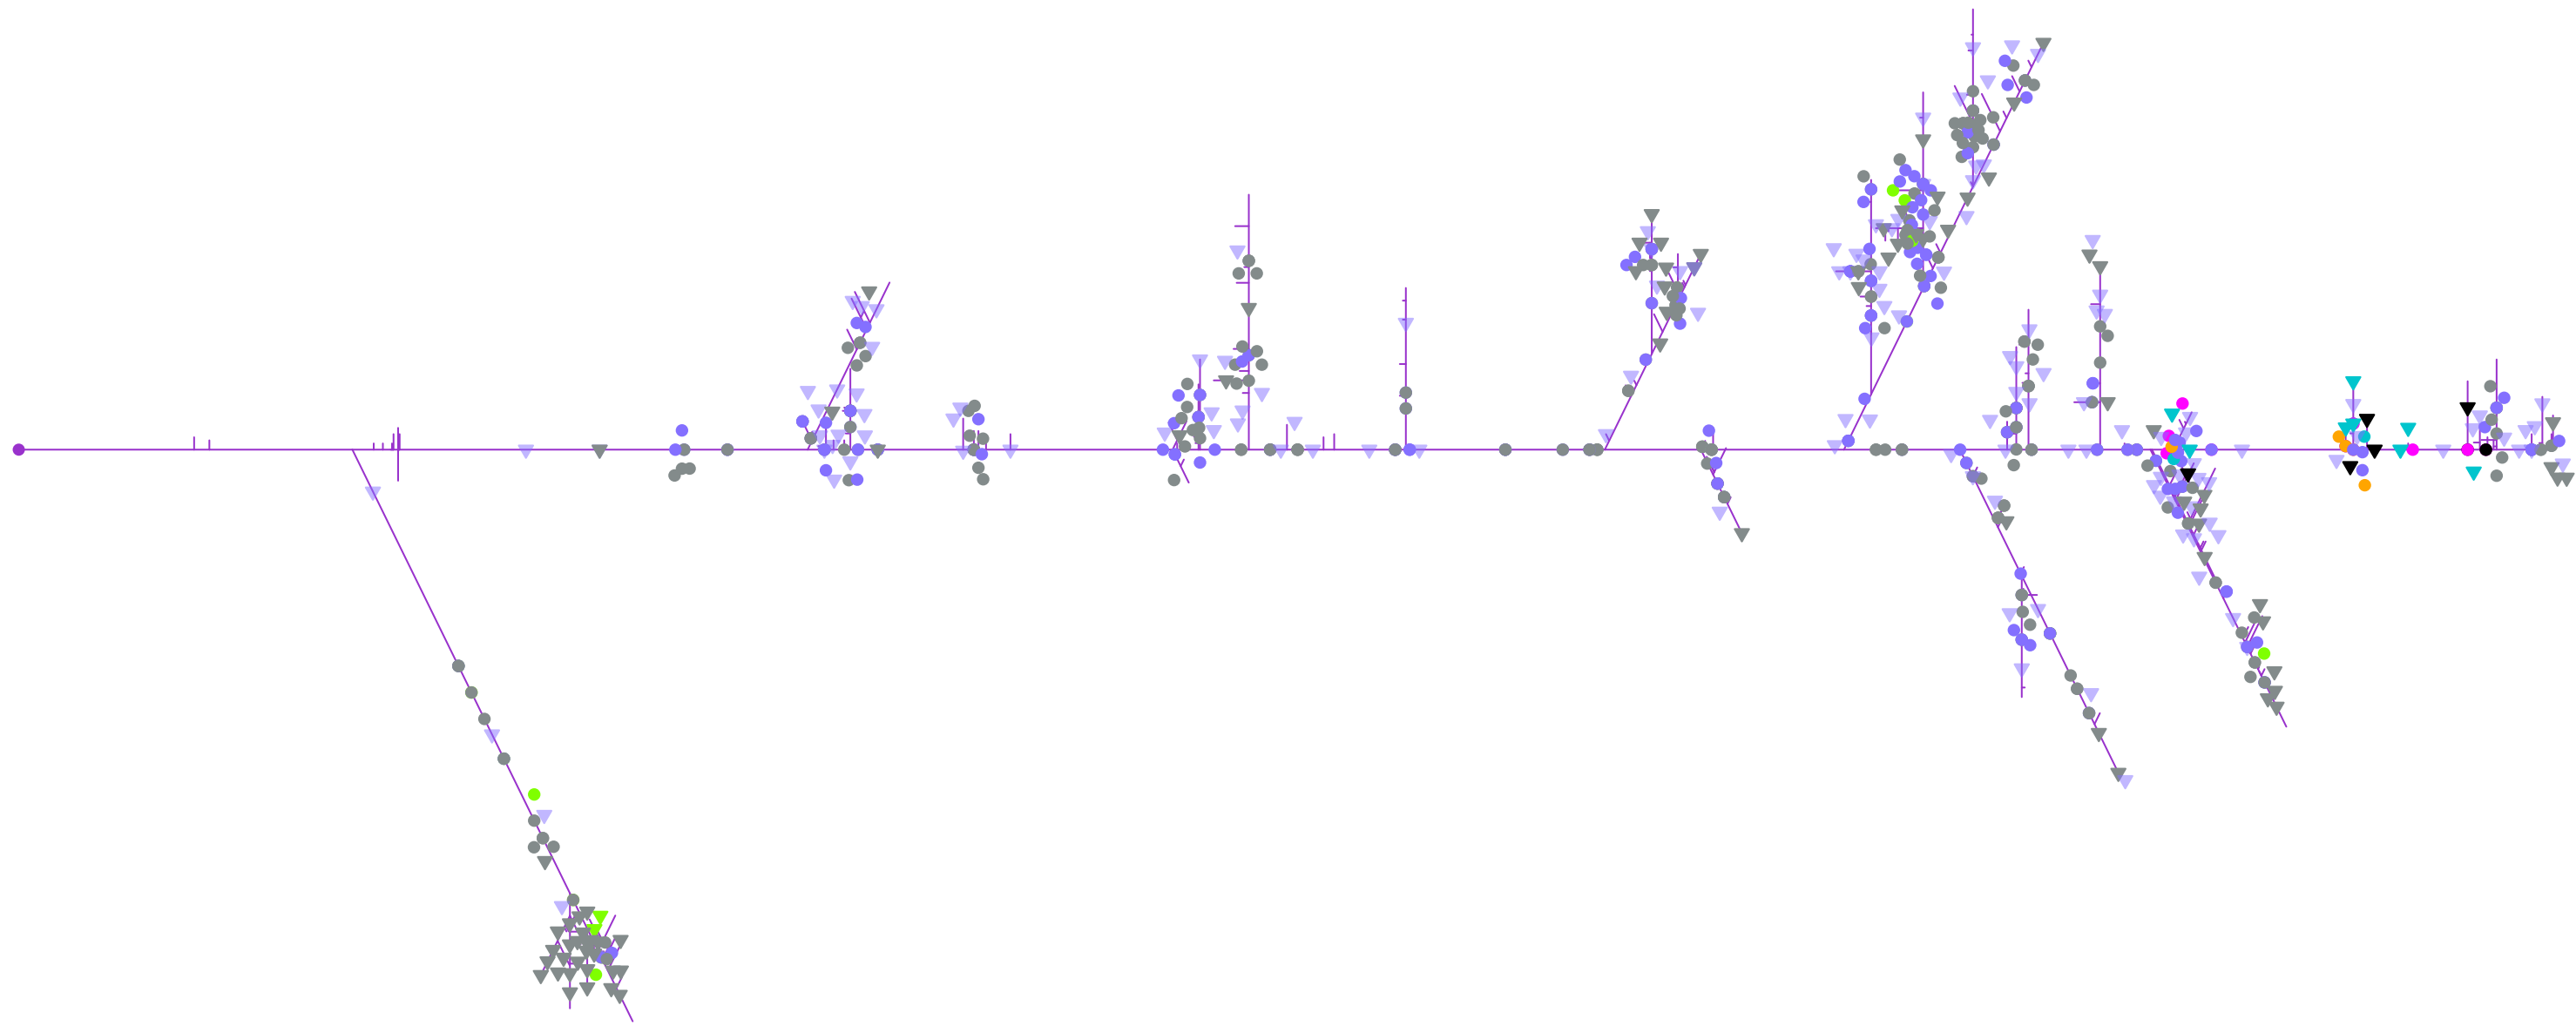

1 claw KC #2 (right)

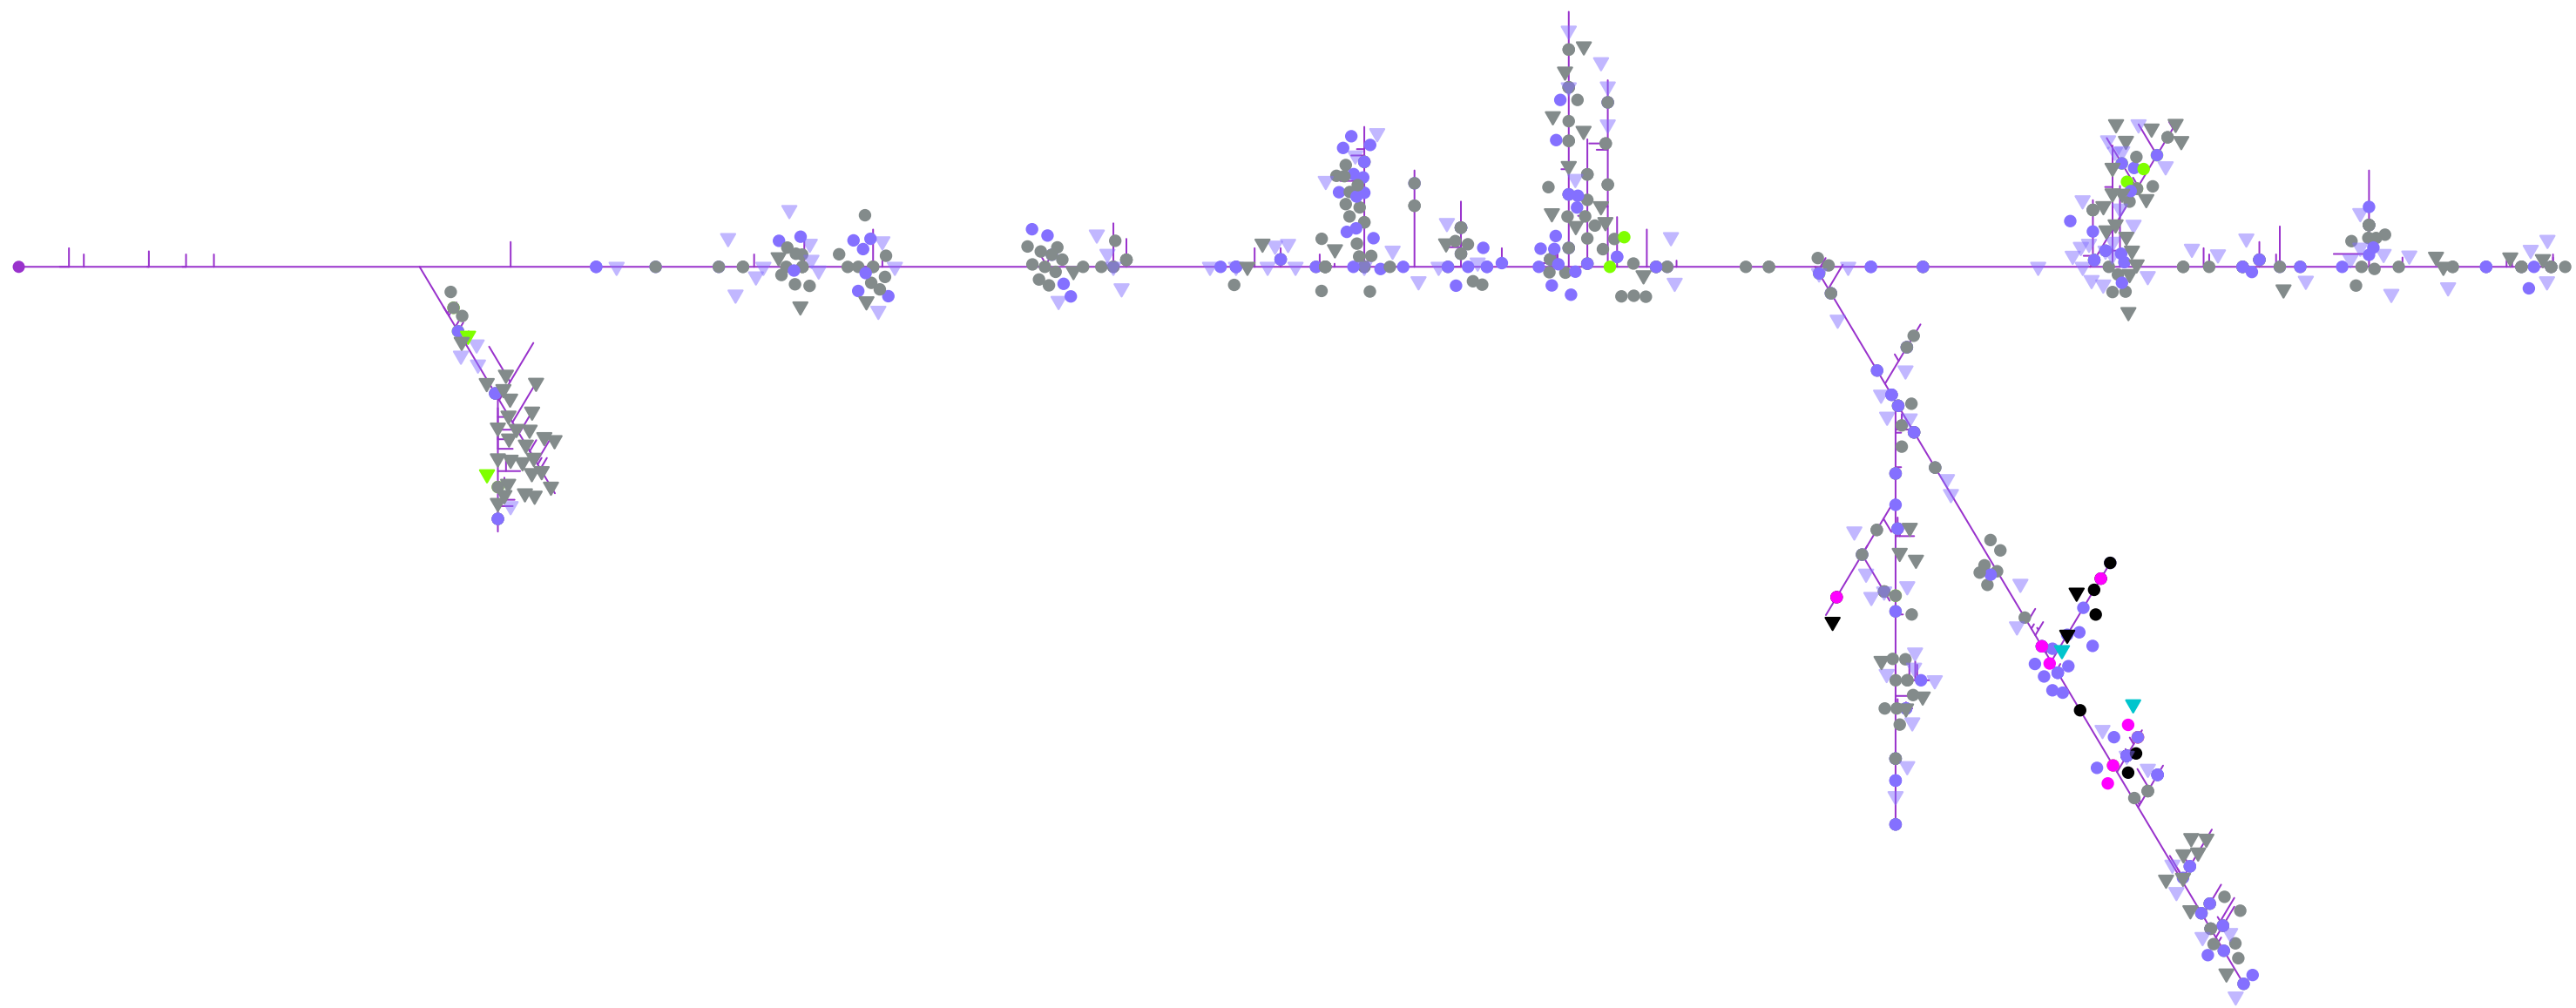

1 claw KC #3 (right)

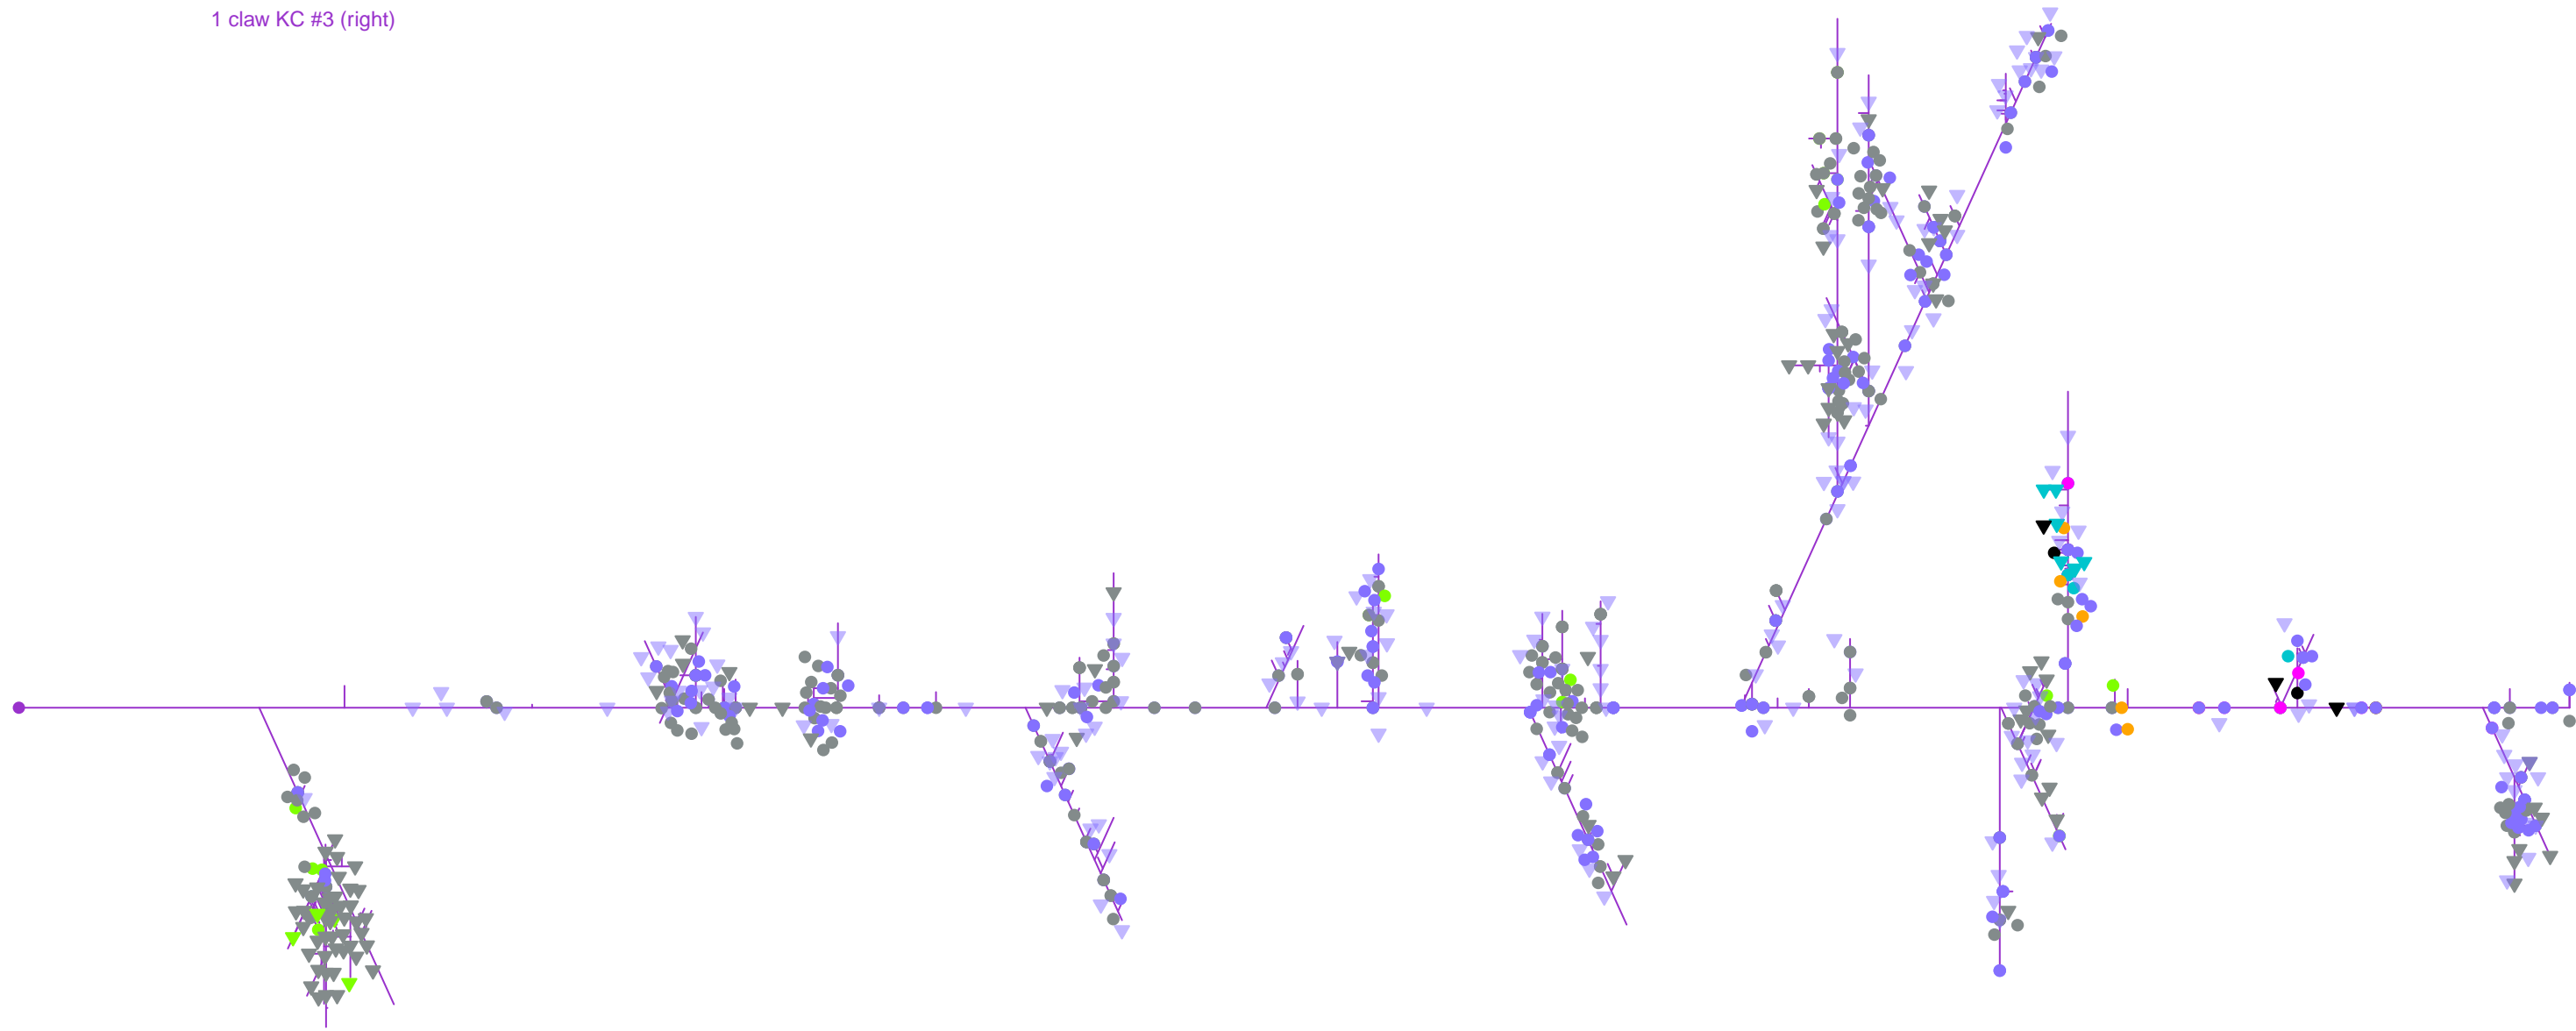

1 claw KC #4 (right)

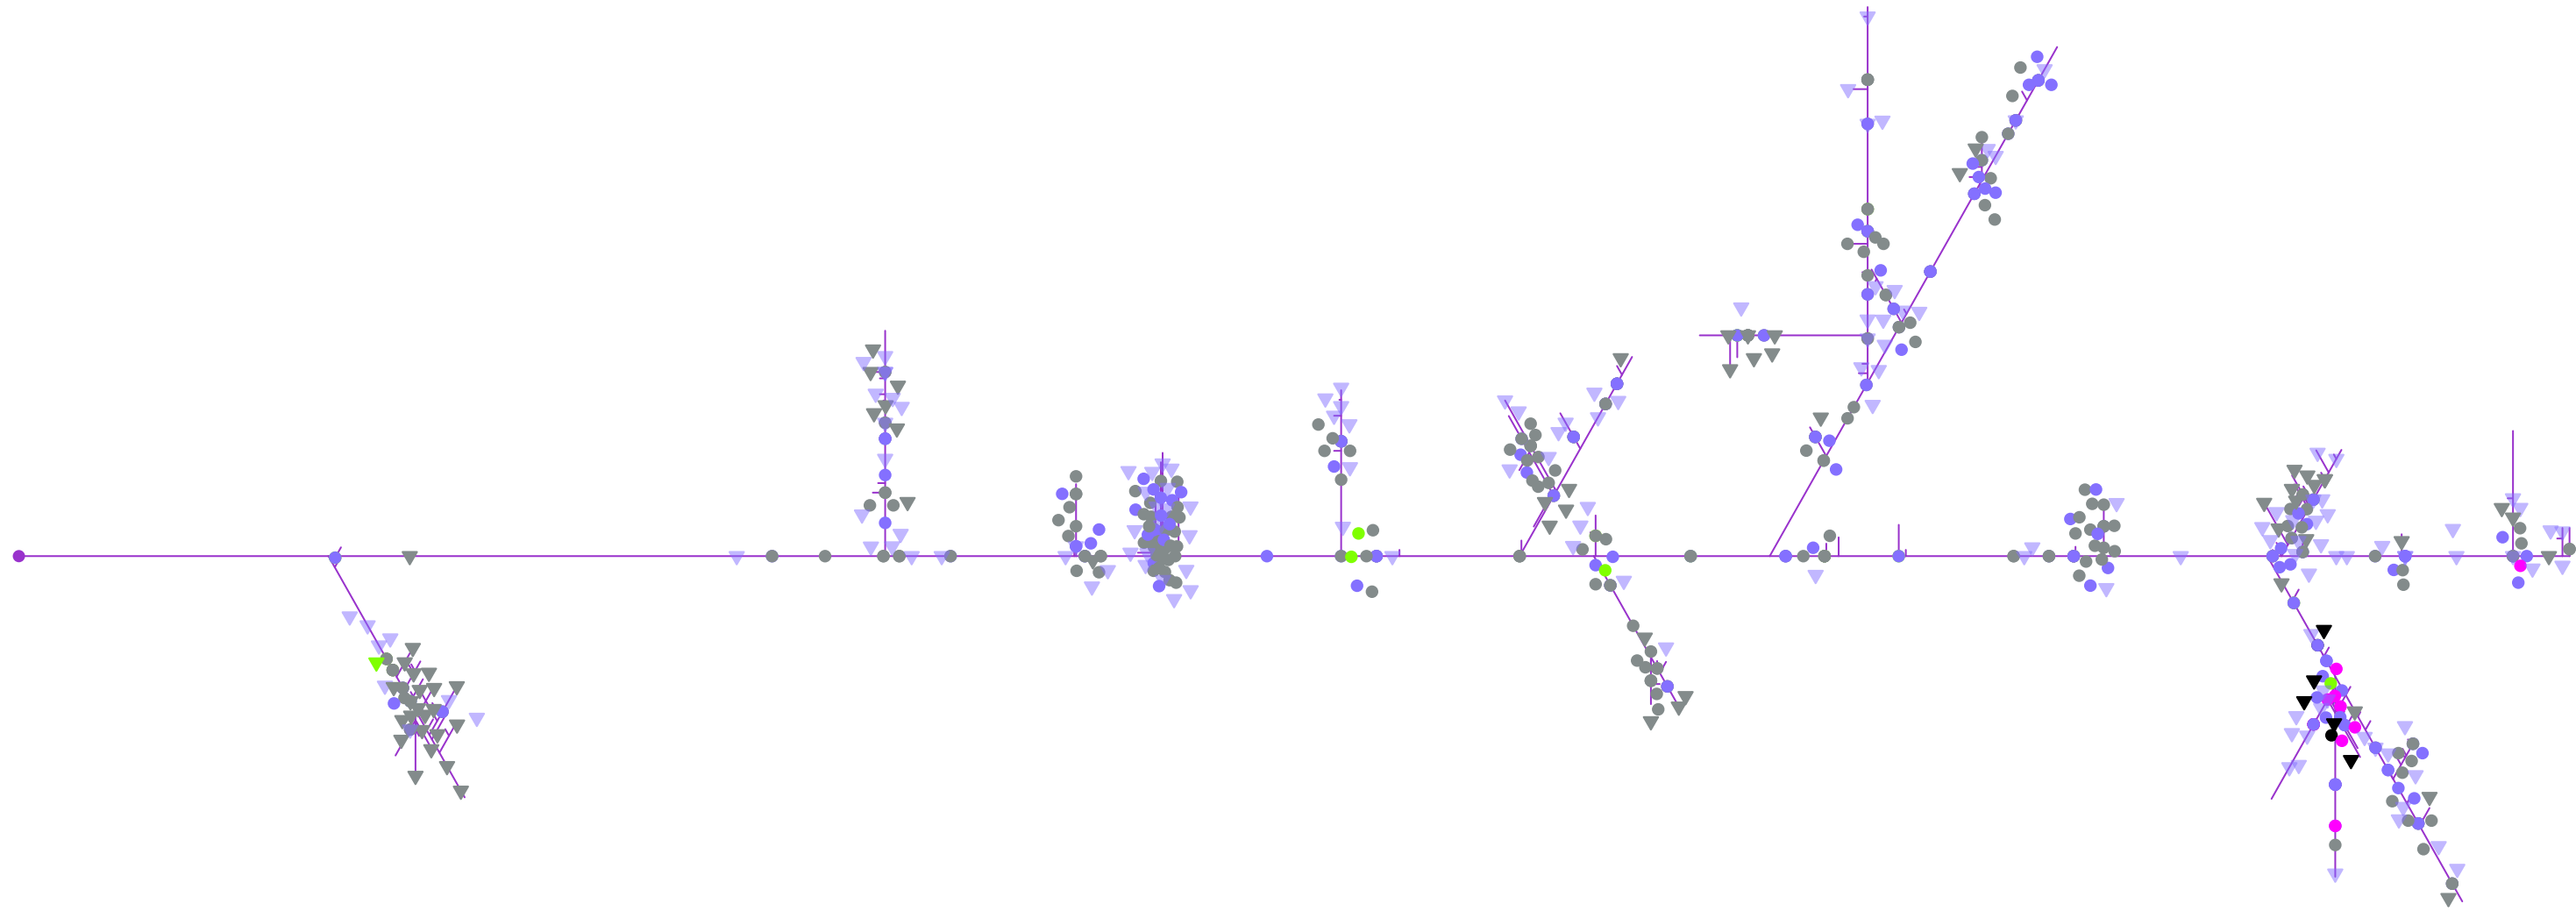

1 claw KC #5 (right)

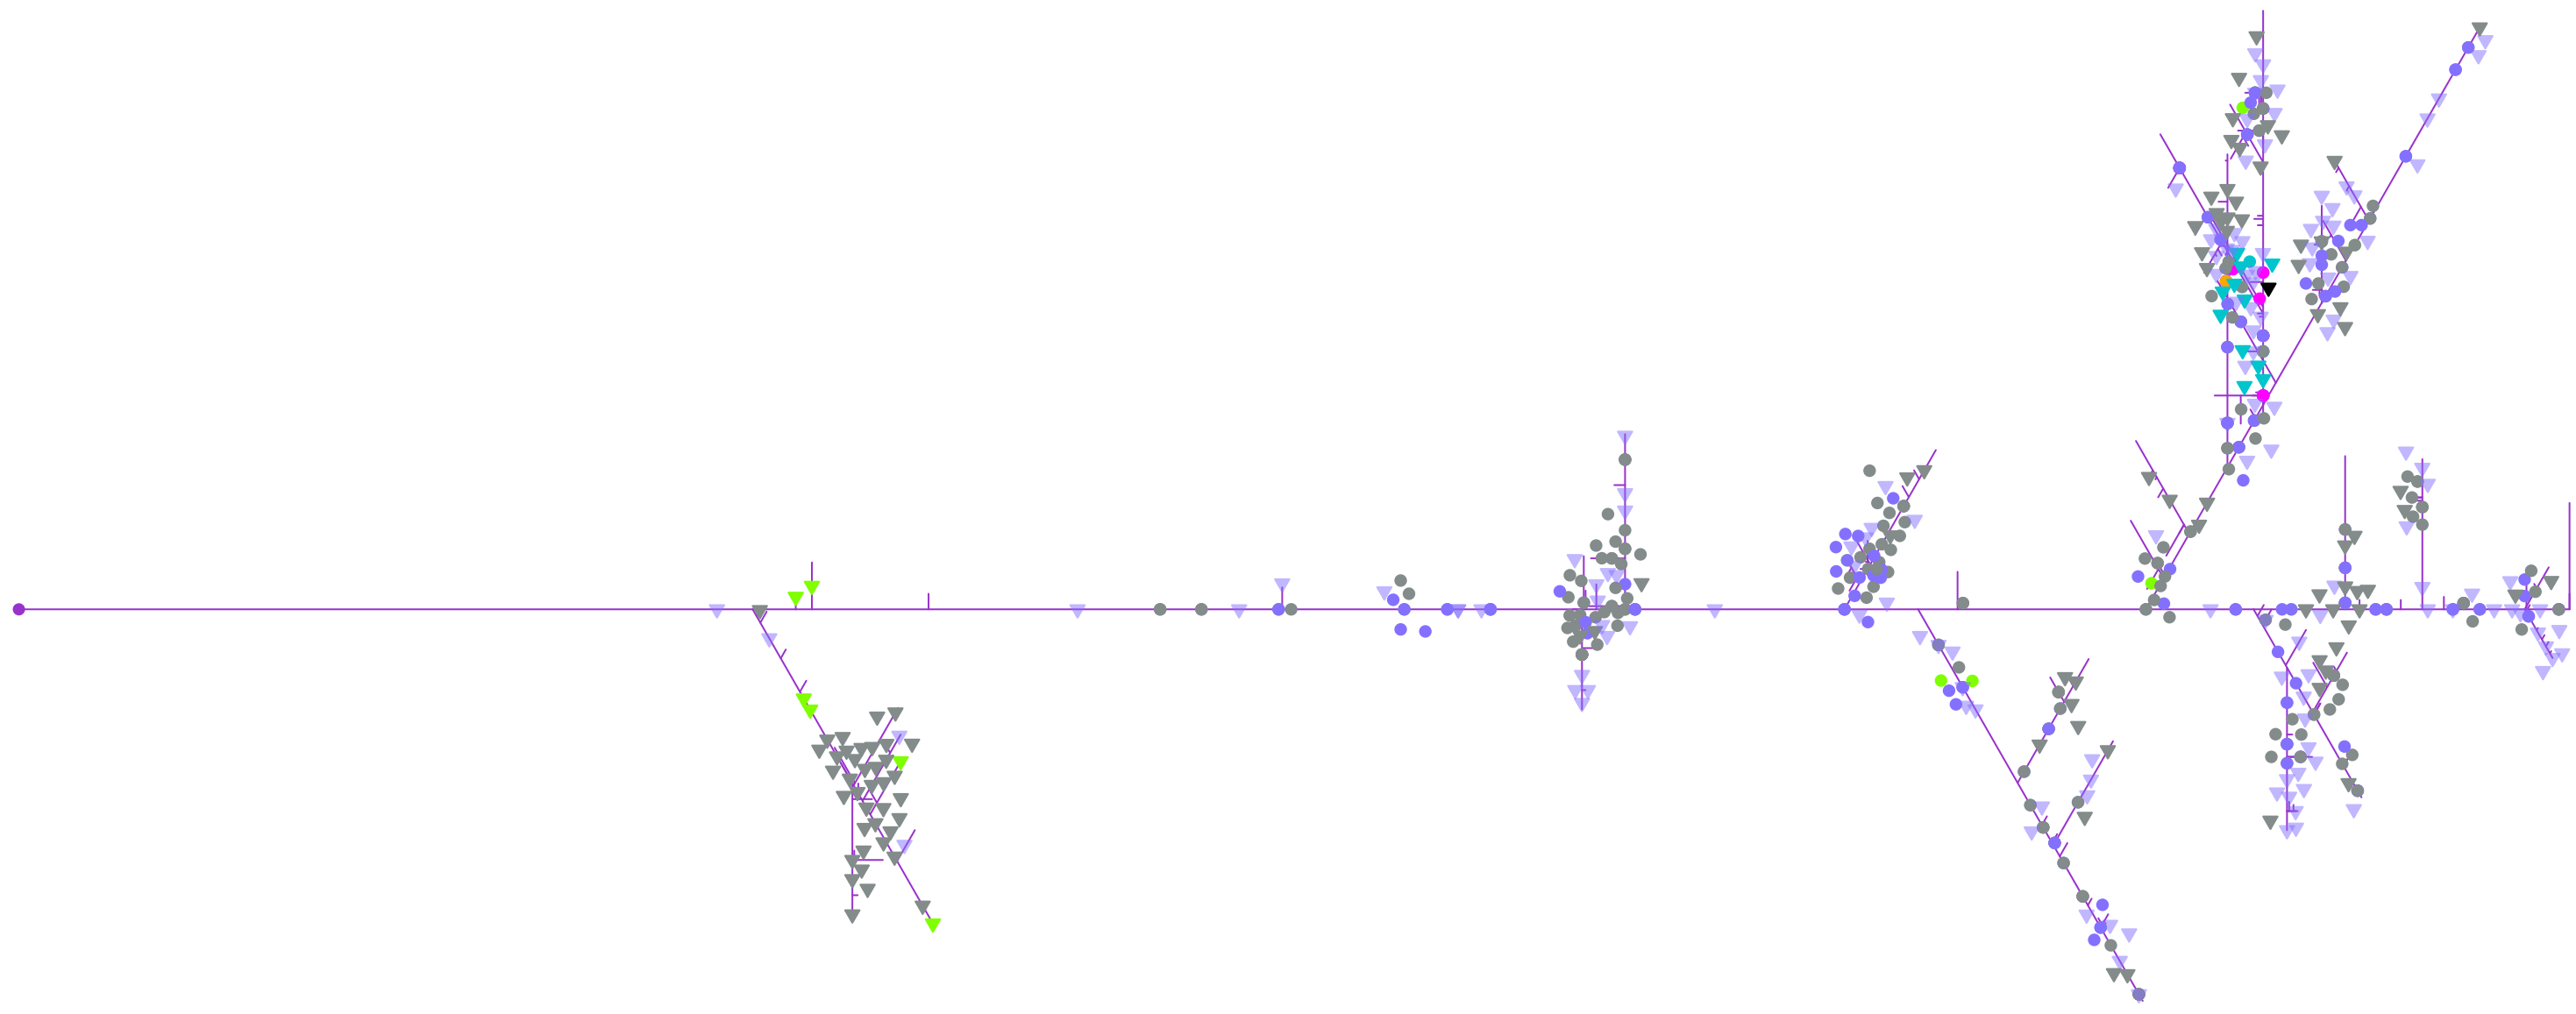

1 claw KC #6 (right)

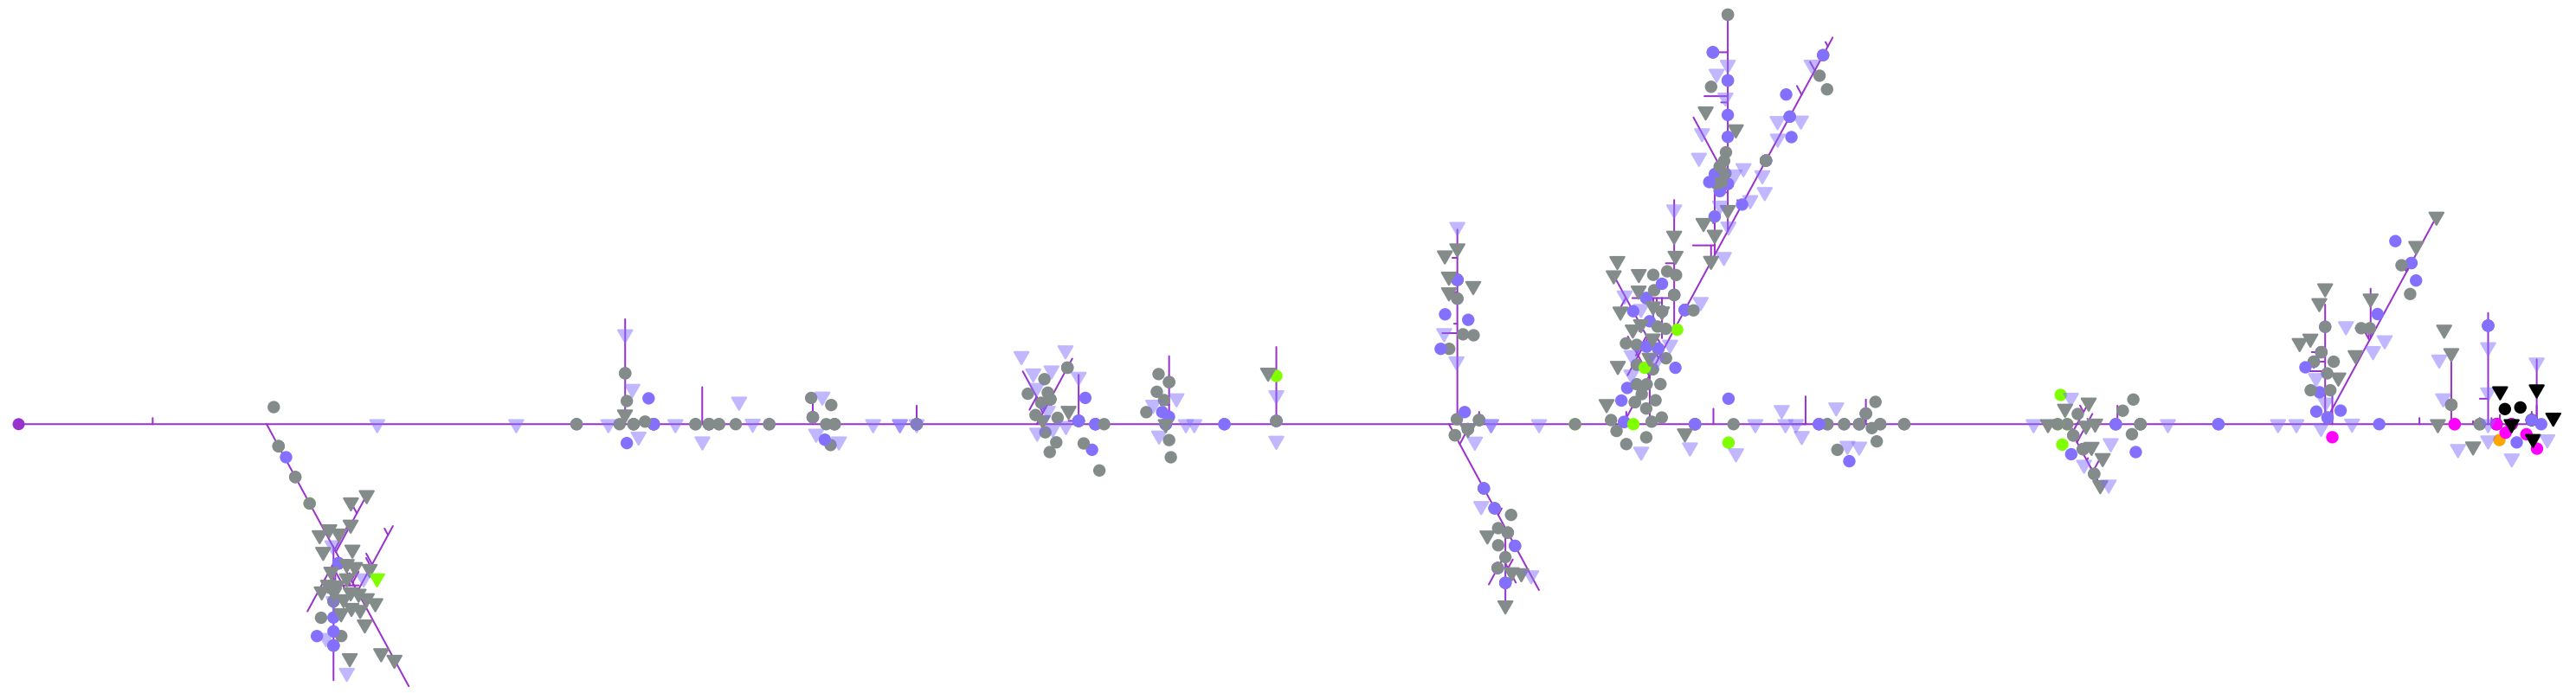



1 claw KC #7 (right)

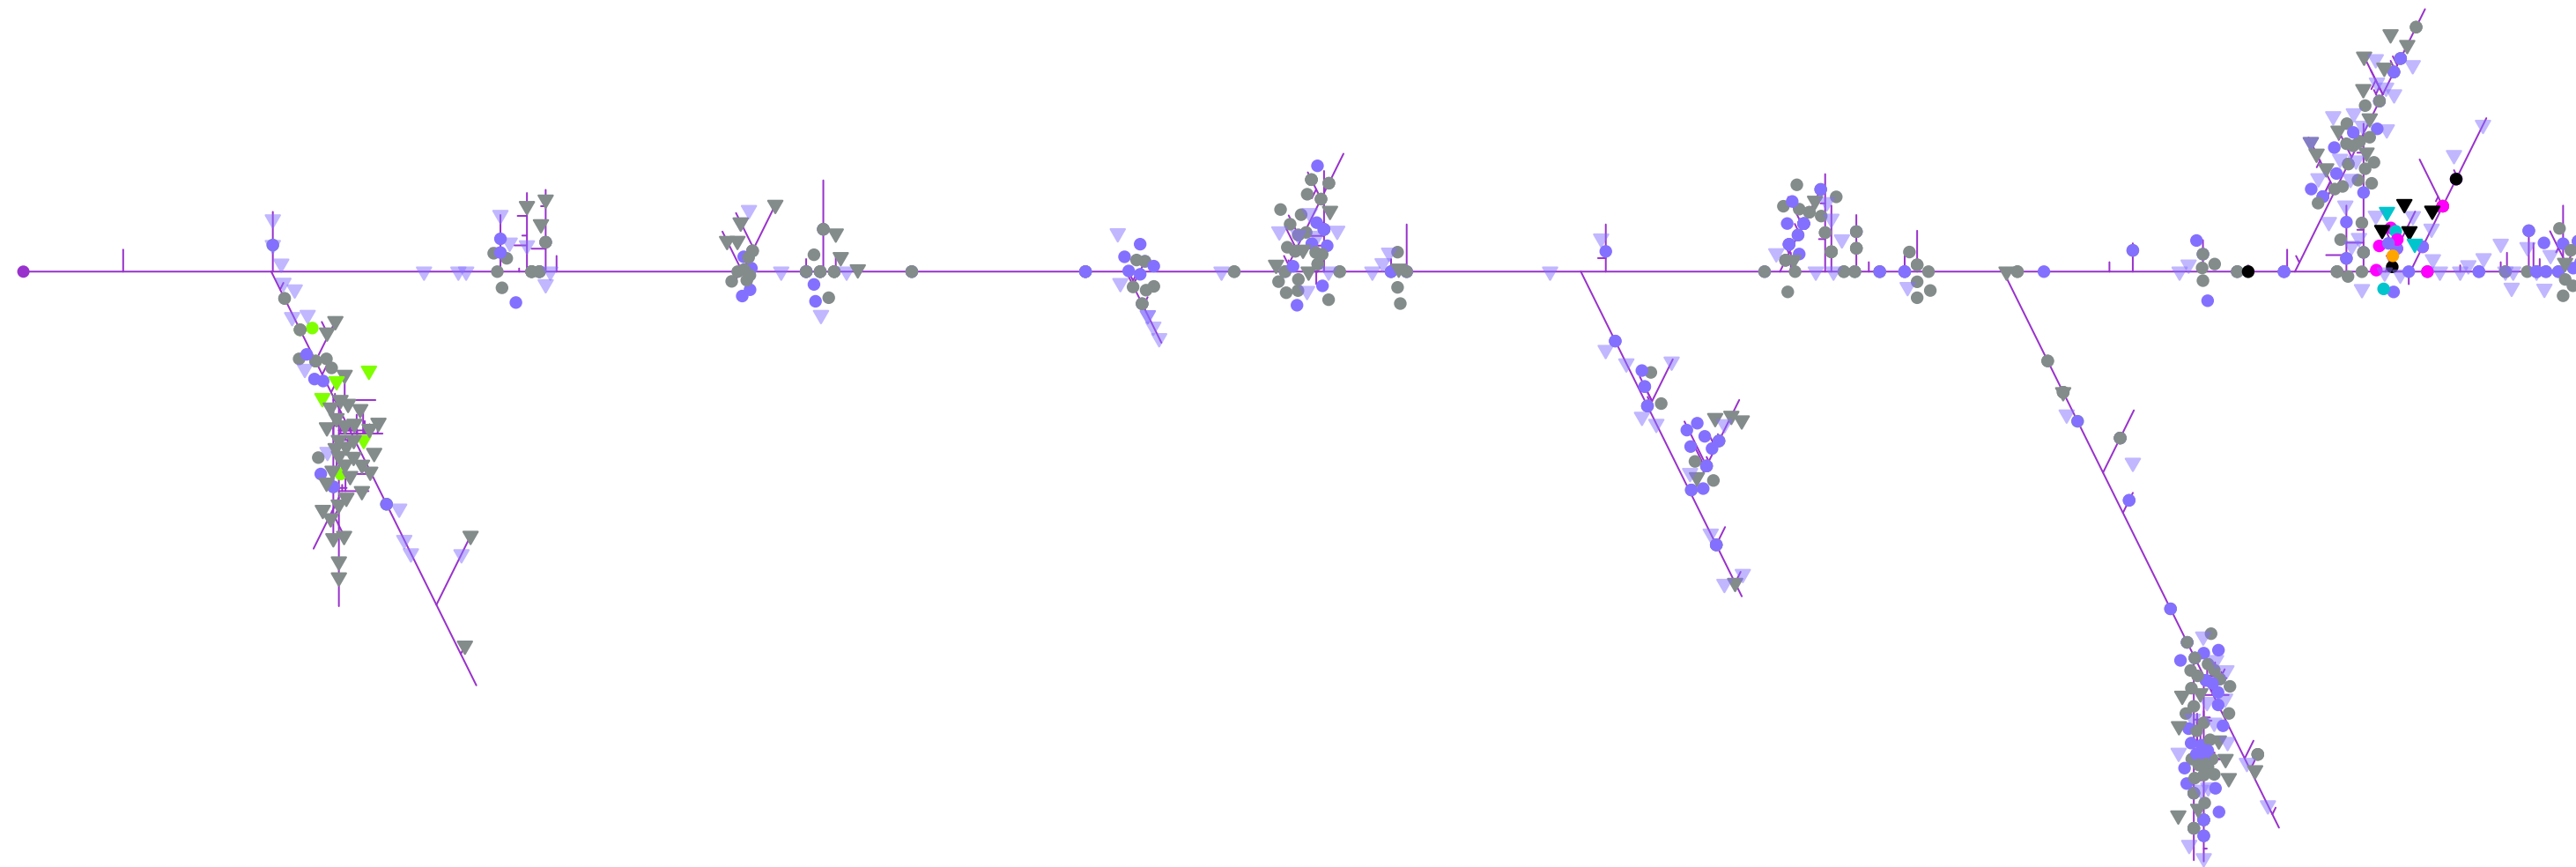

1 claw KC #8 (right)

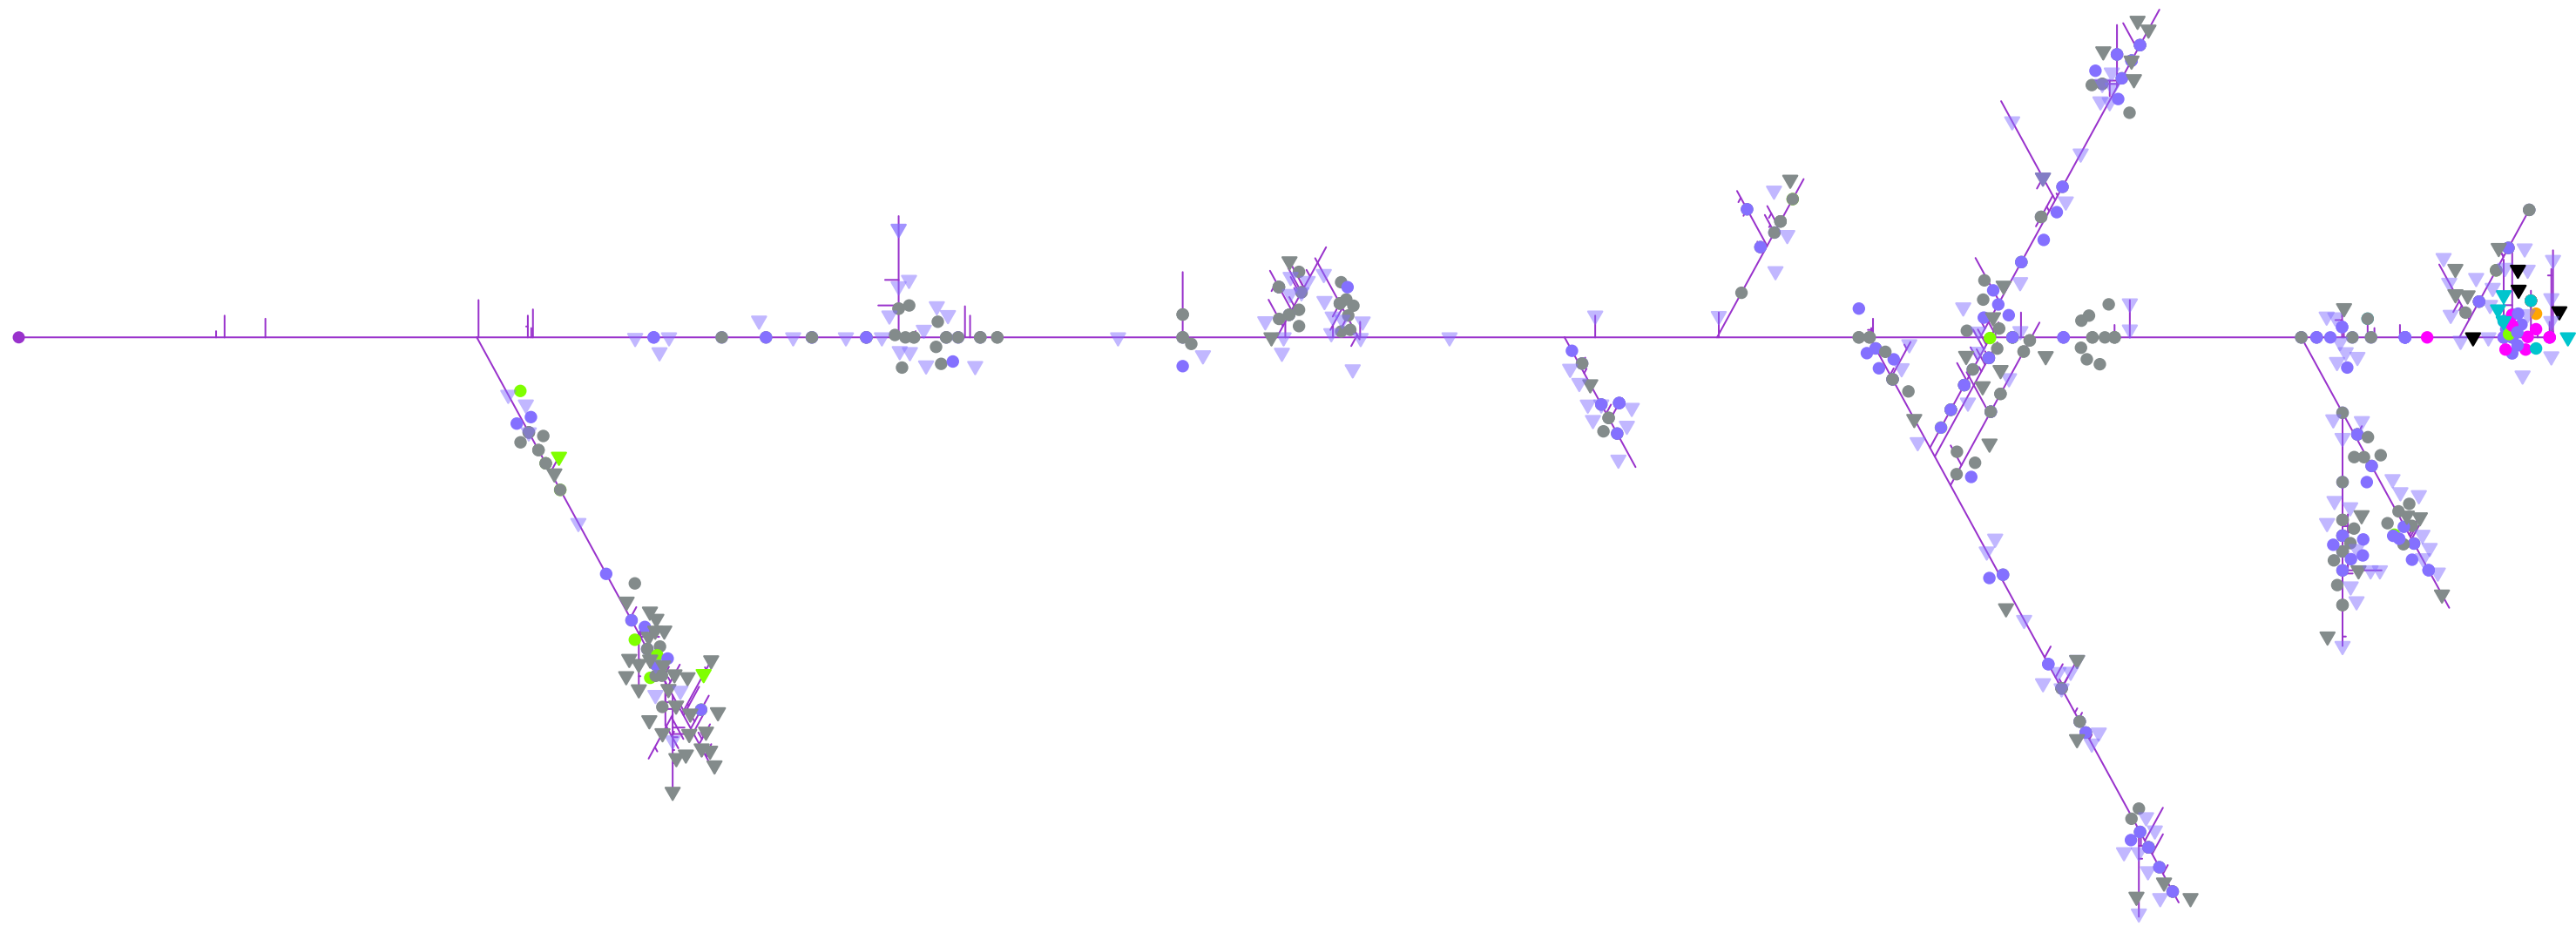

1 claw KC #9 (right)

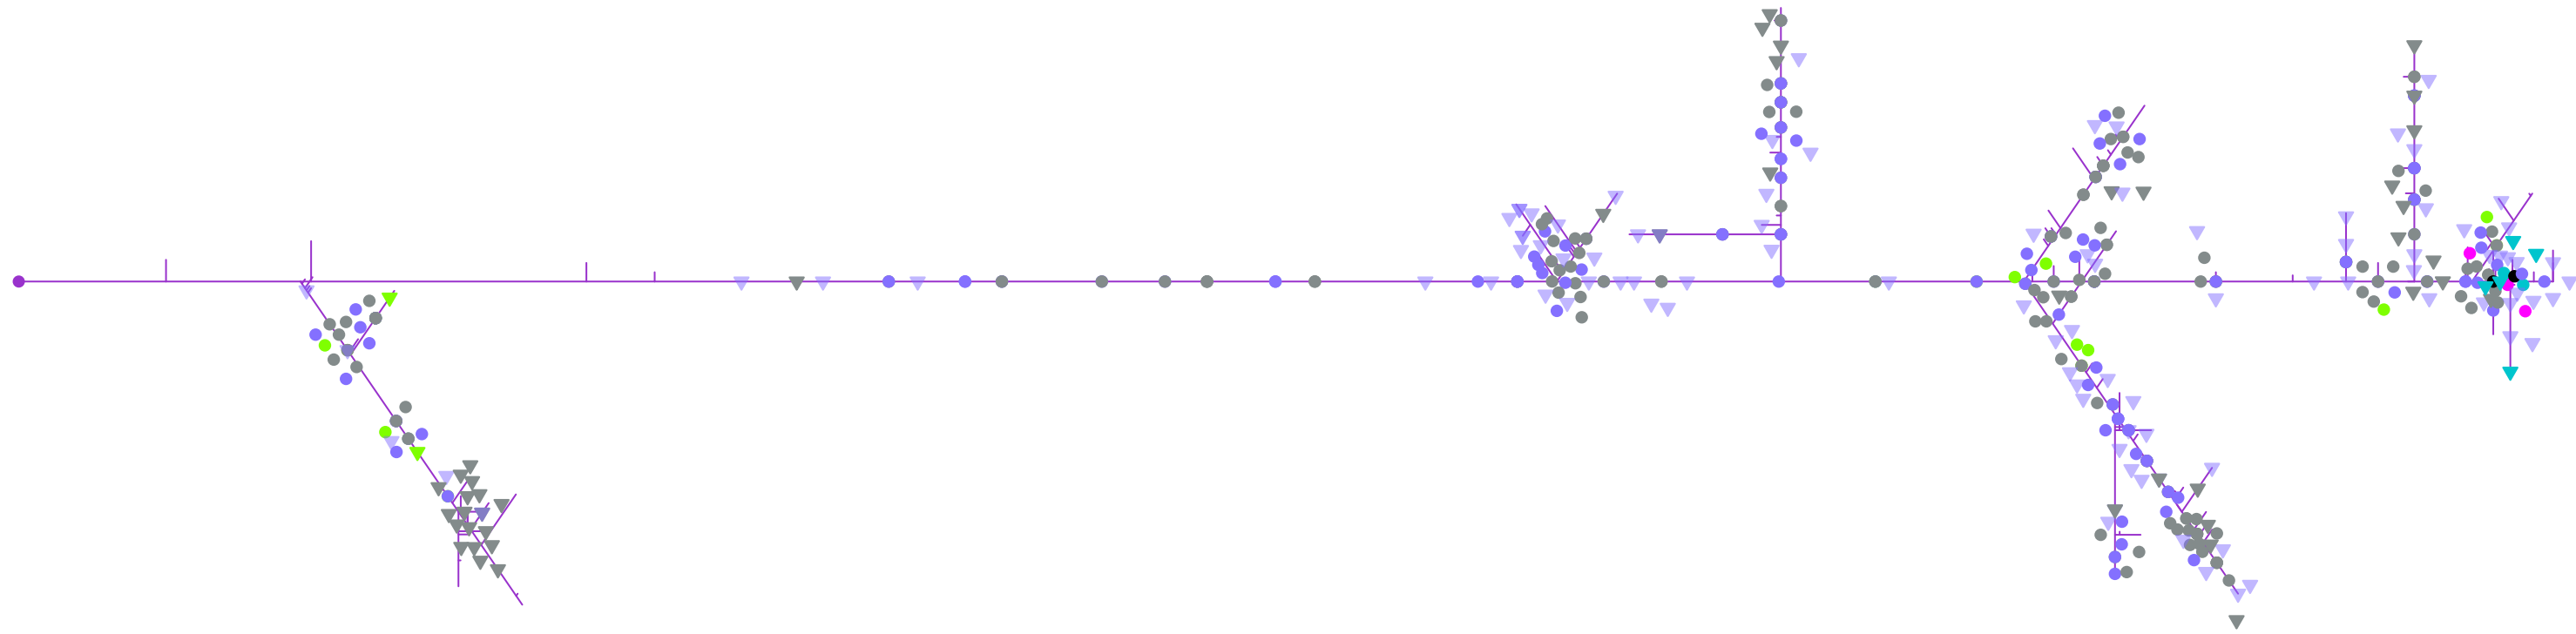

1 claw KC #10 (right)

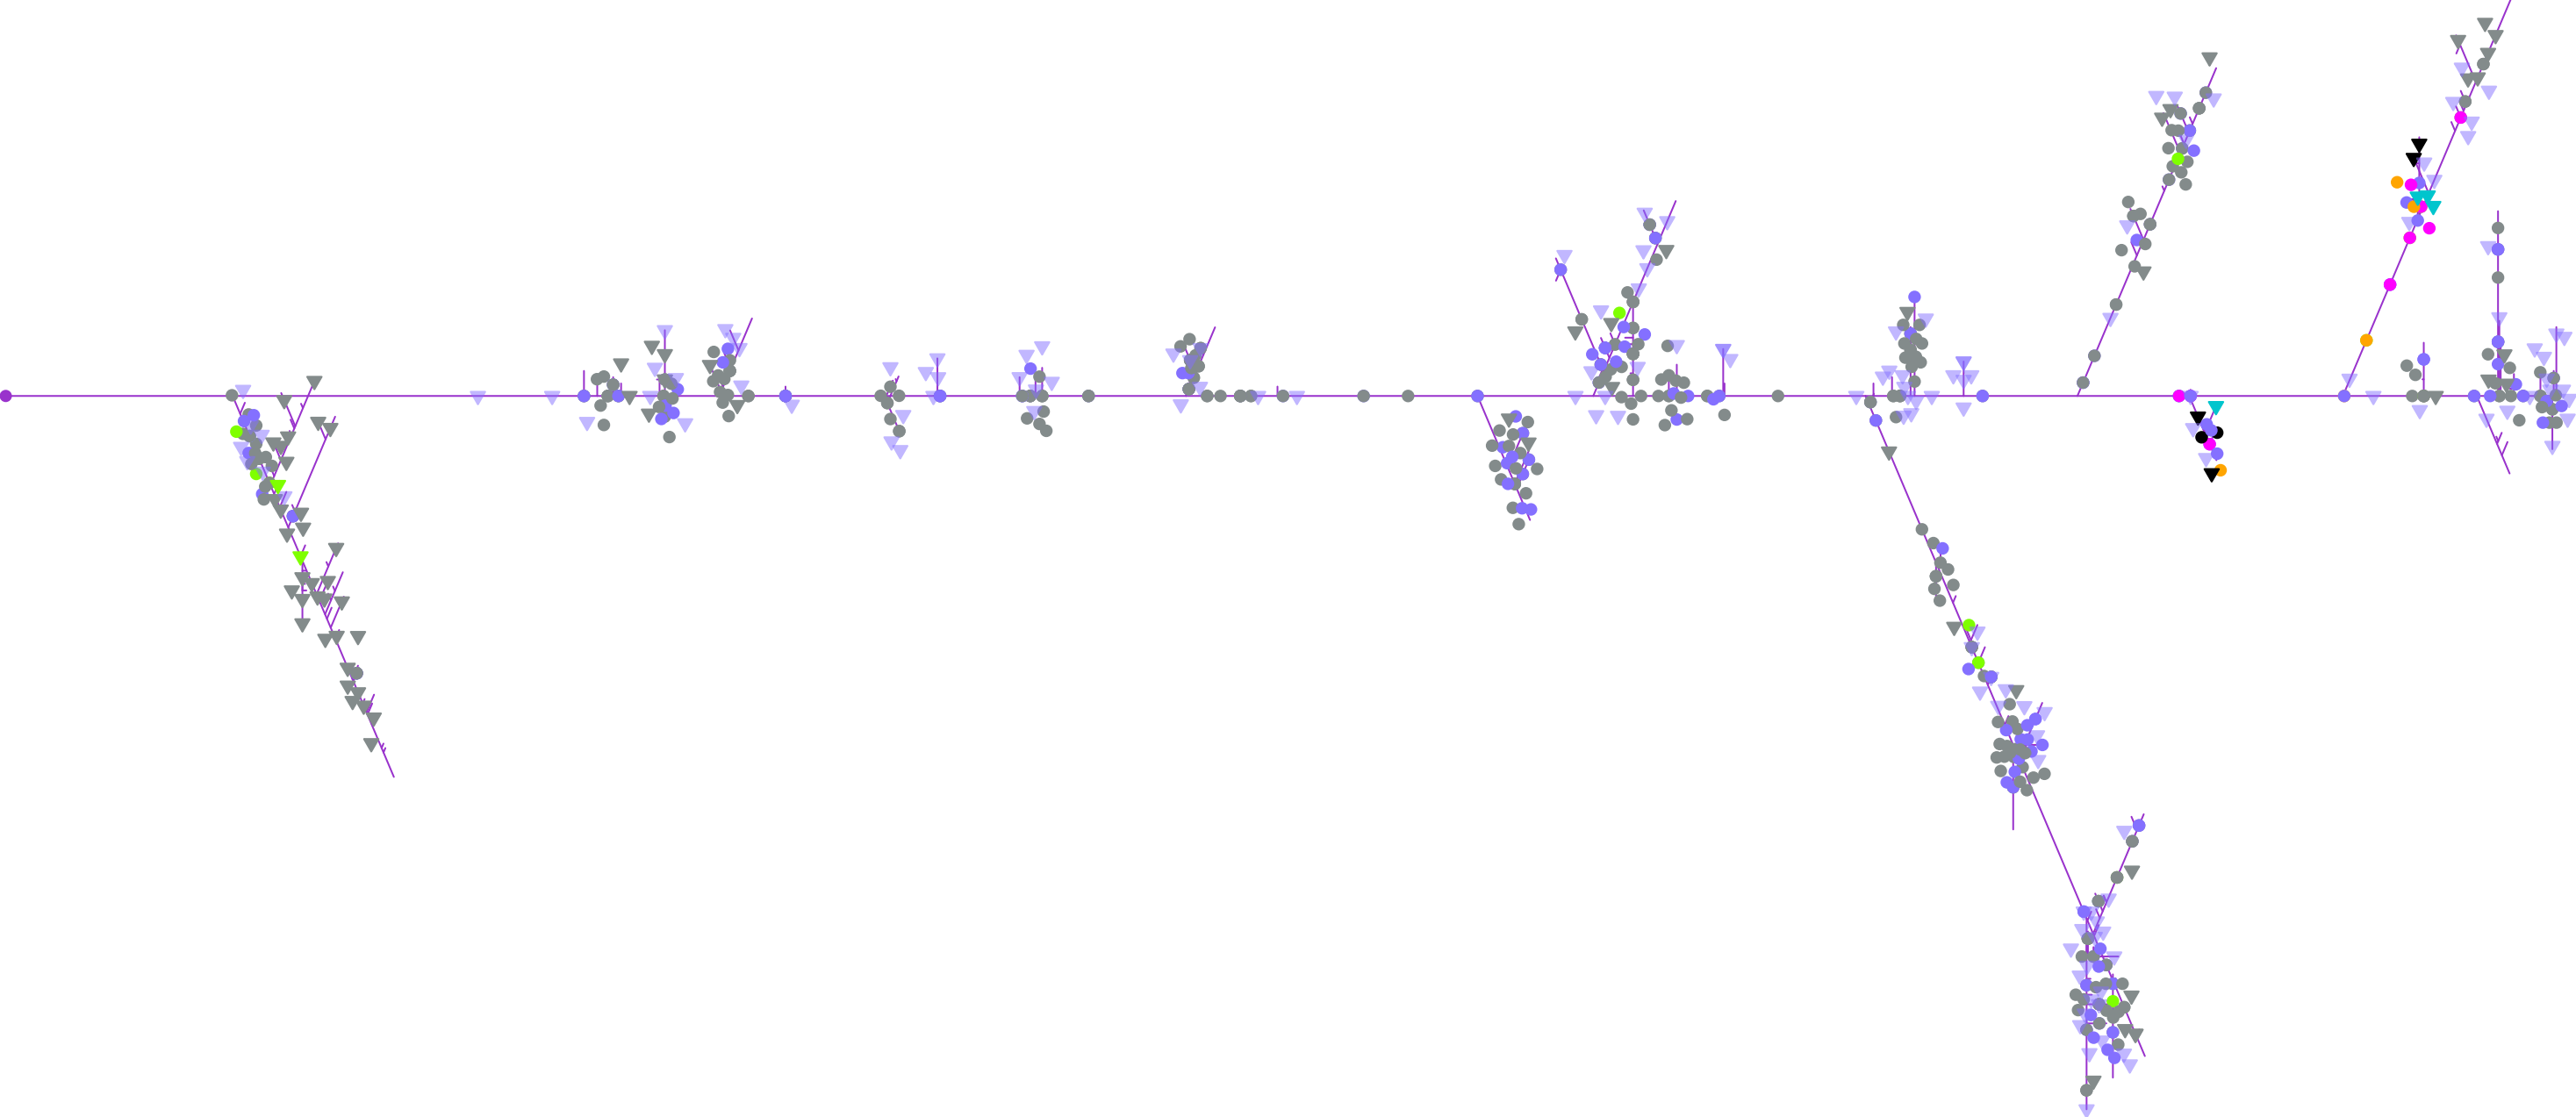

1 claw KC #11 (right)

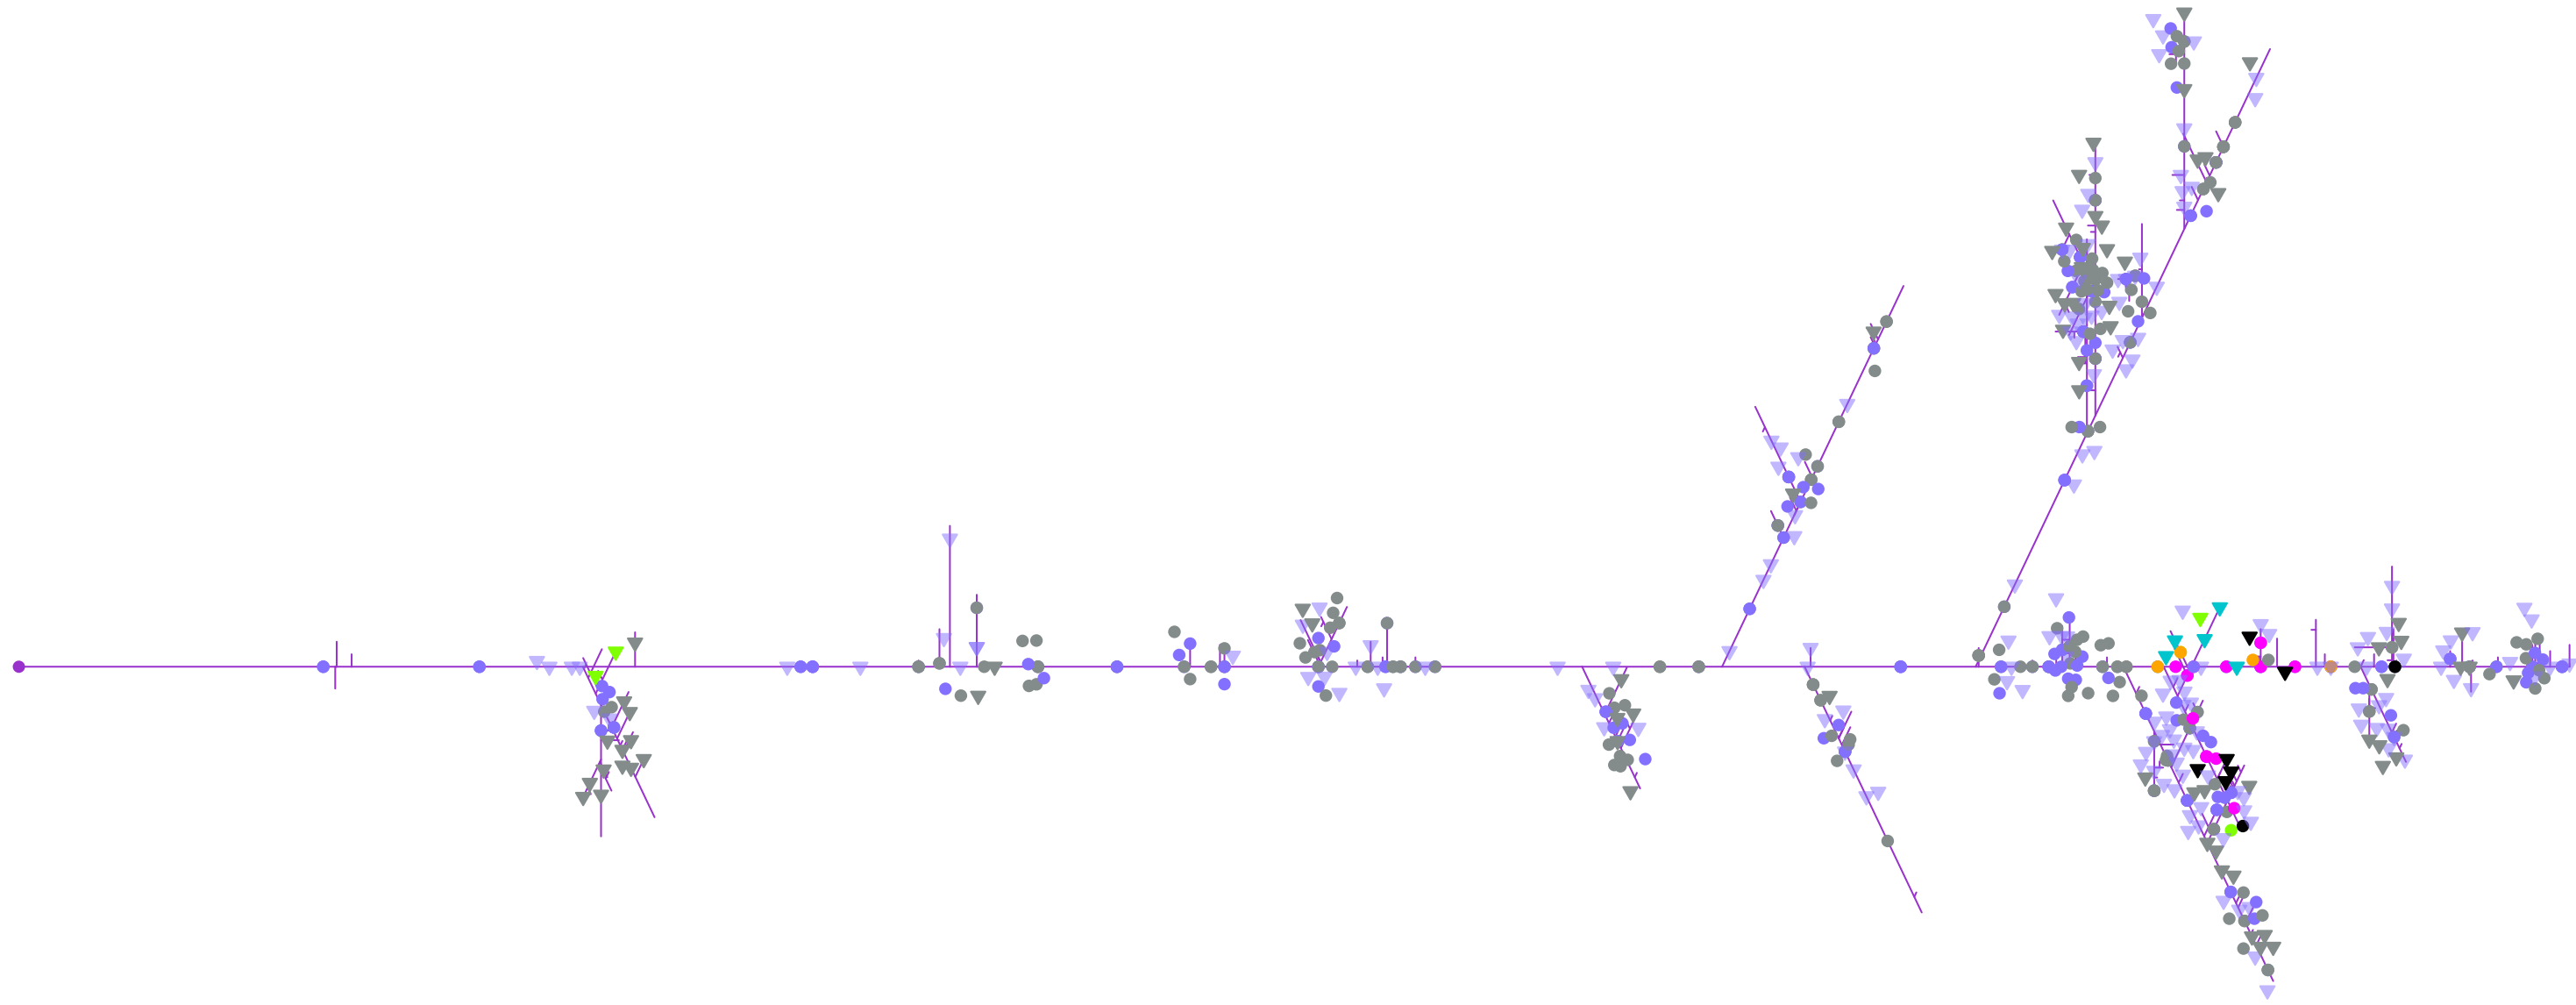



1 claw KC #13 (right)

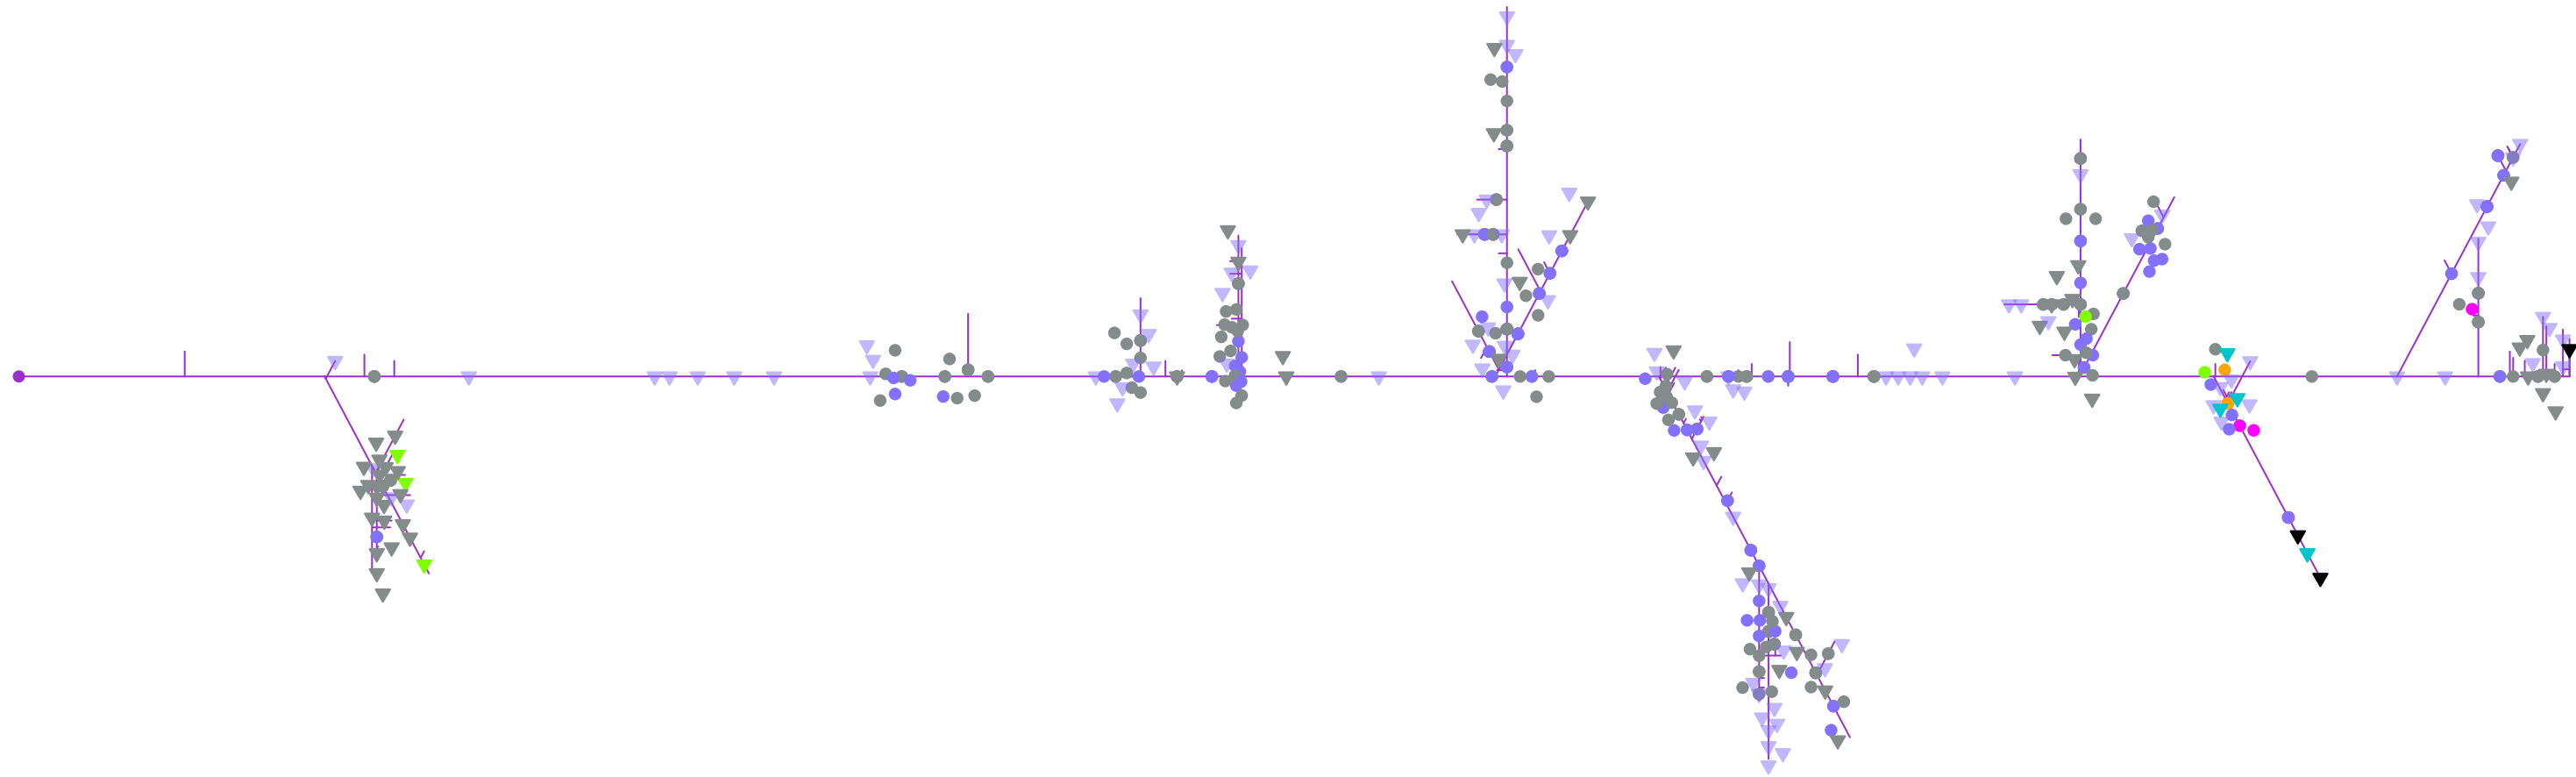

1 claw KC #14 (right)

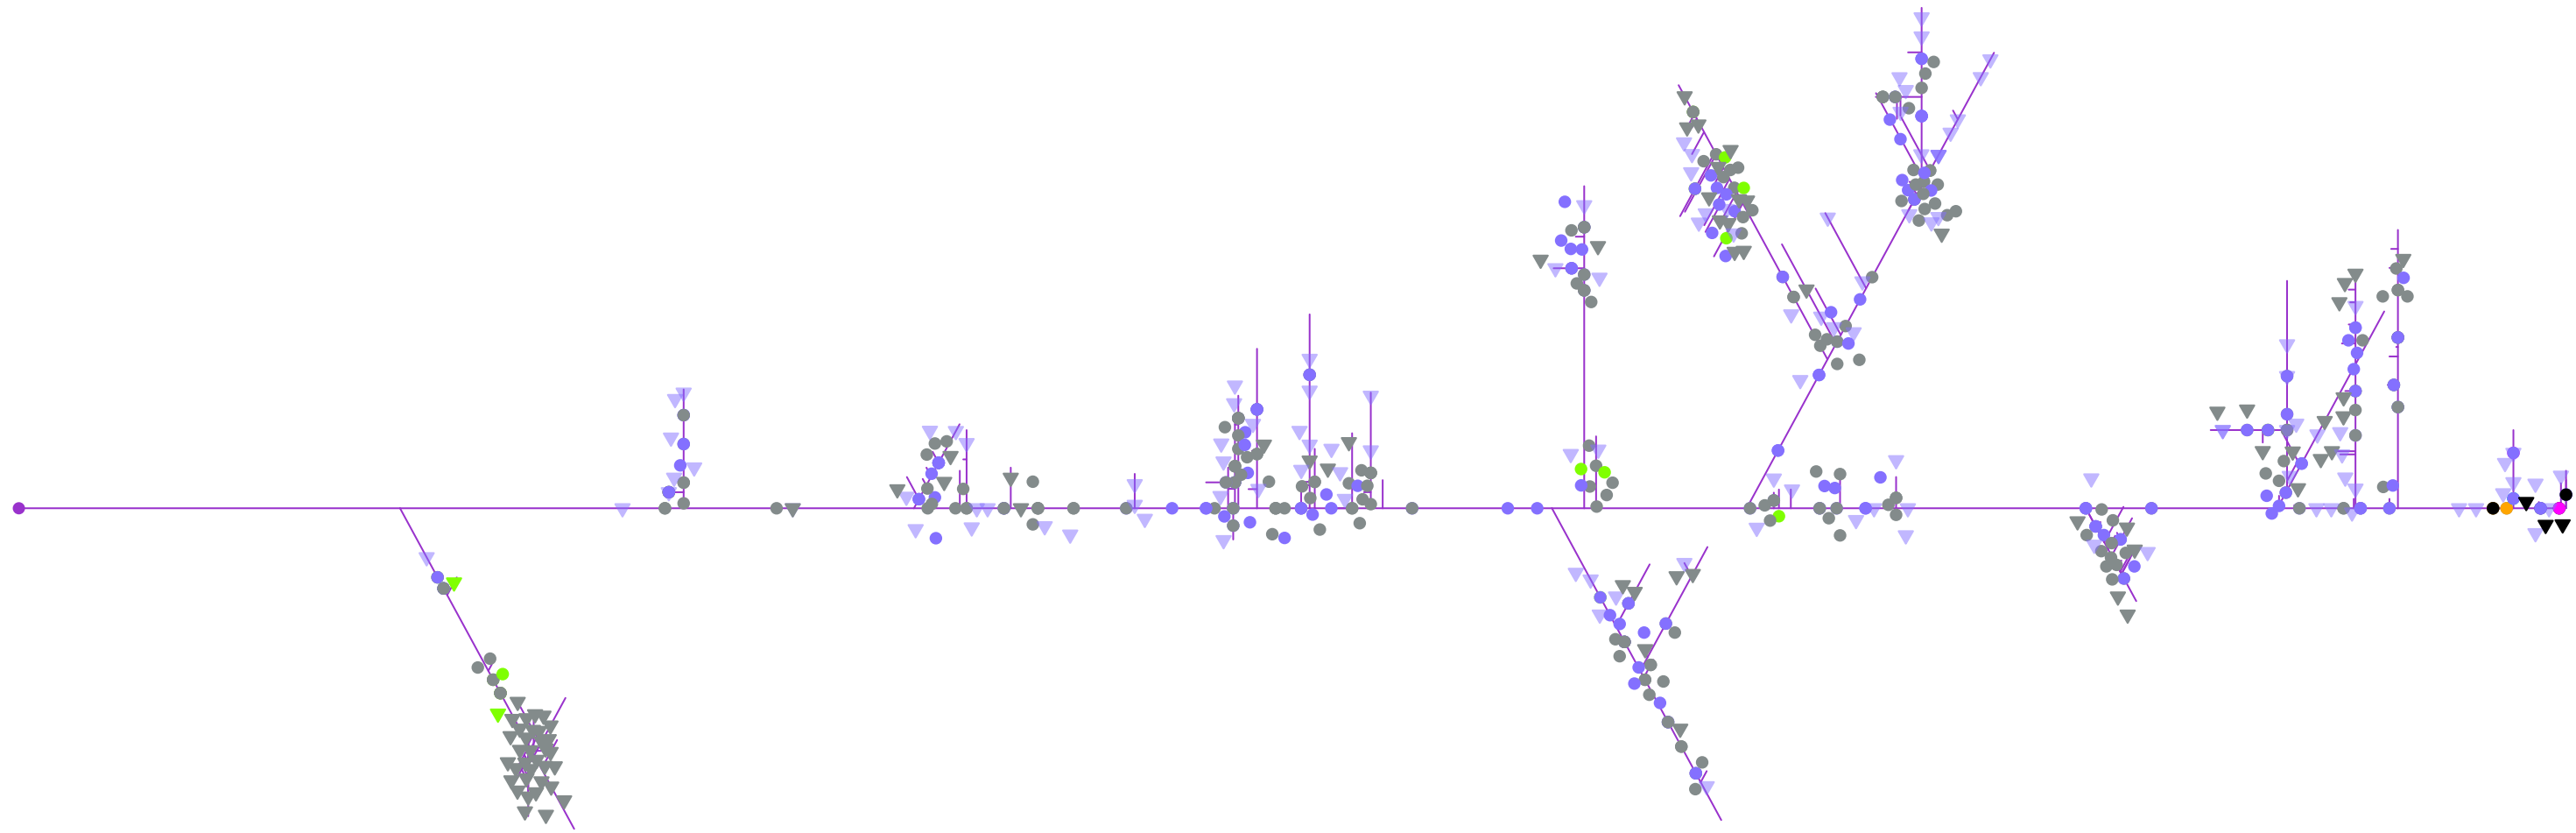



1 claw KC #15 (right)

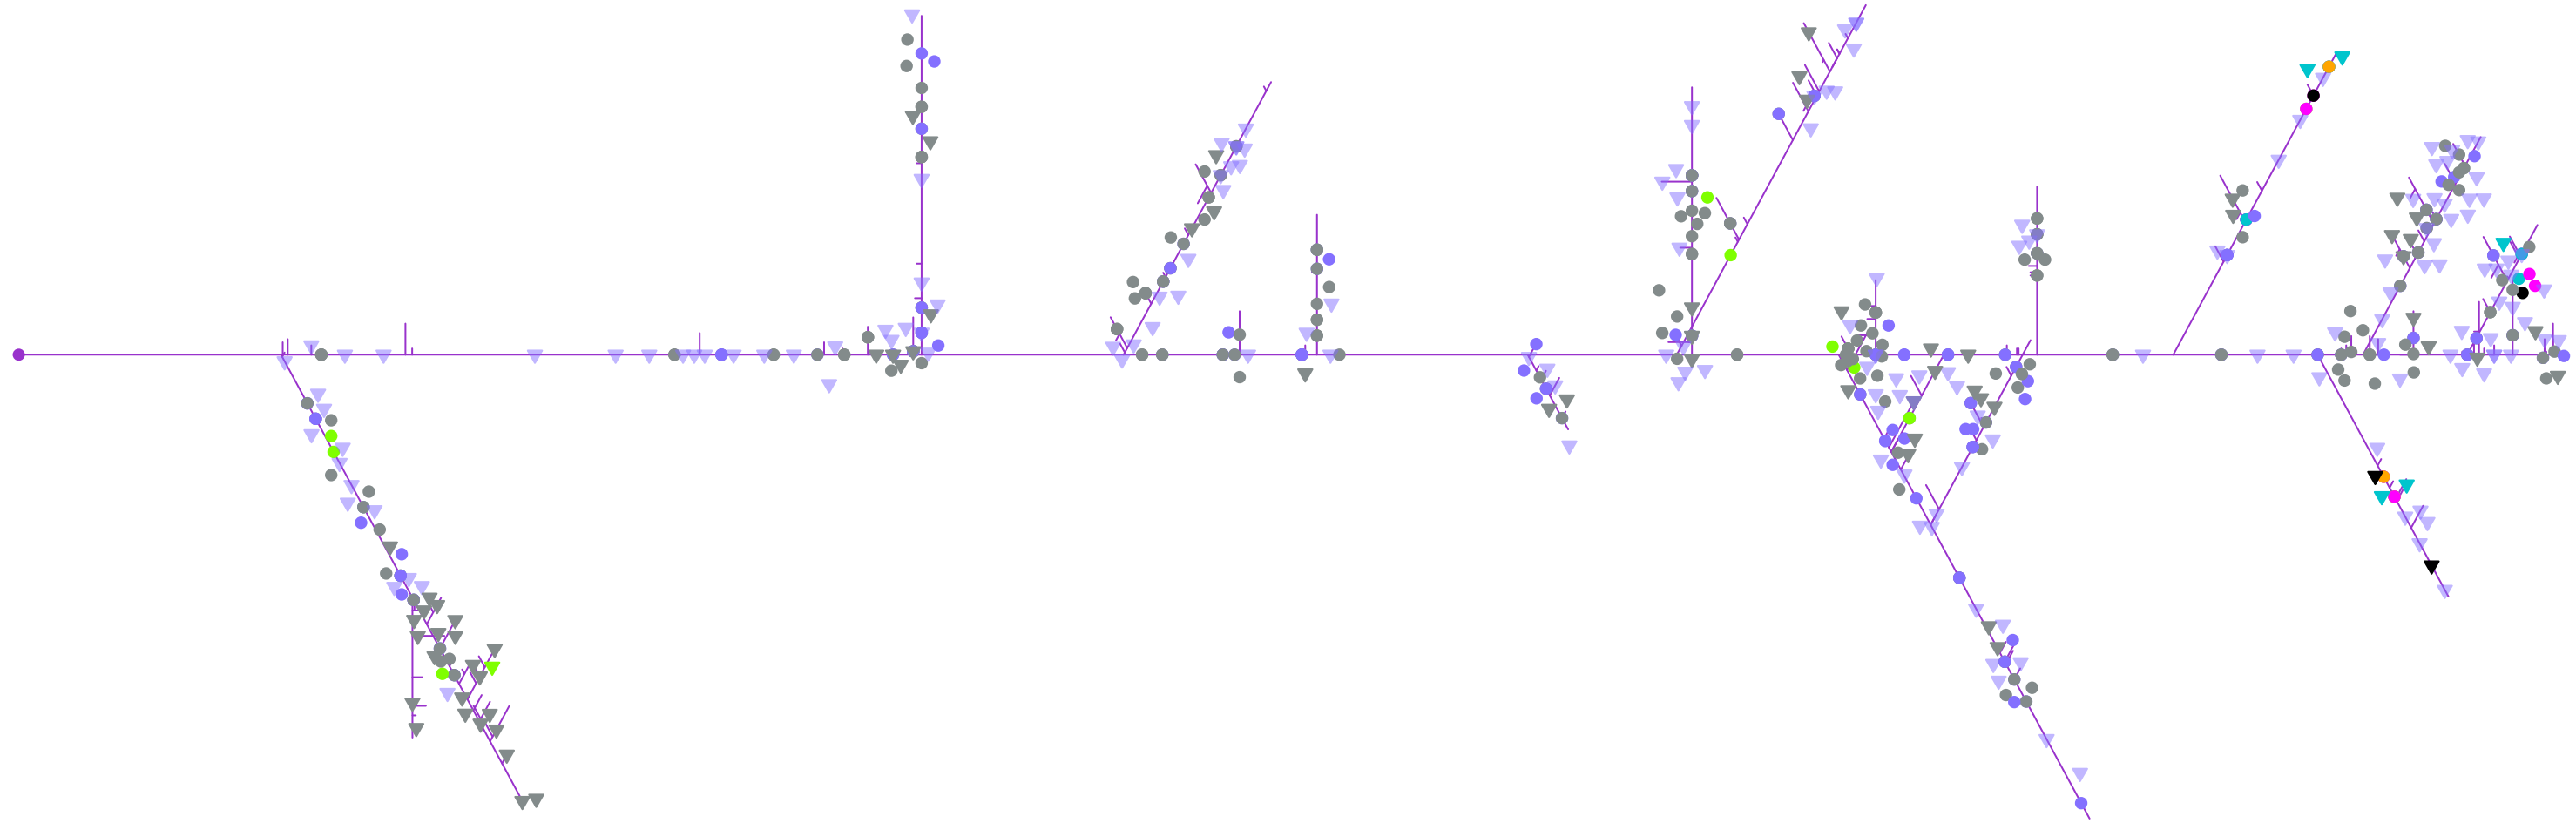

1 claw KC #16 (right)

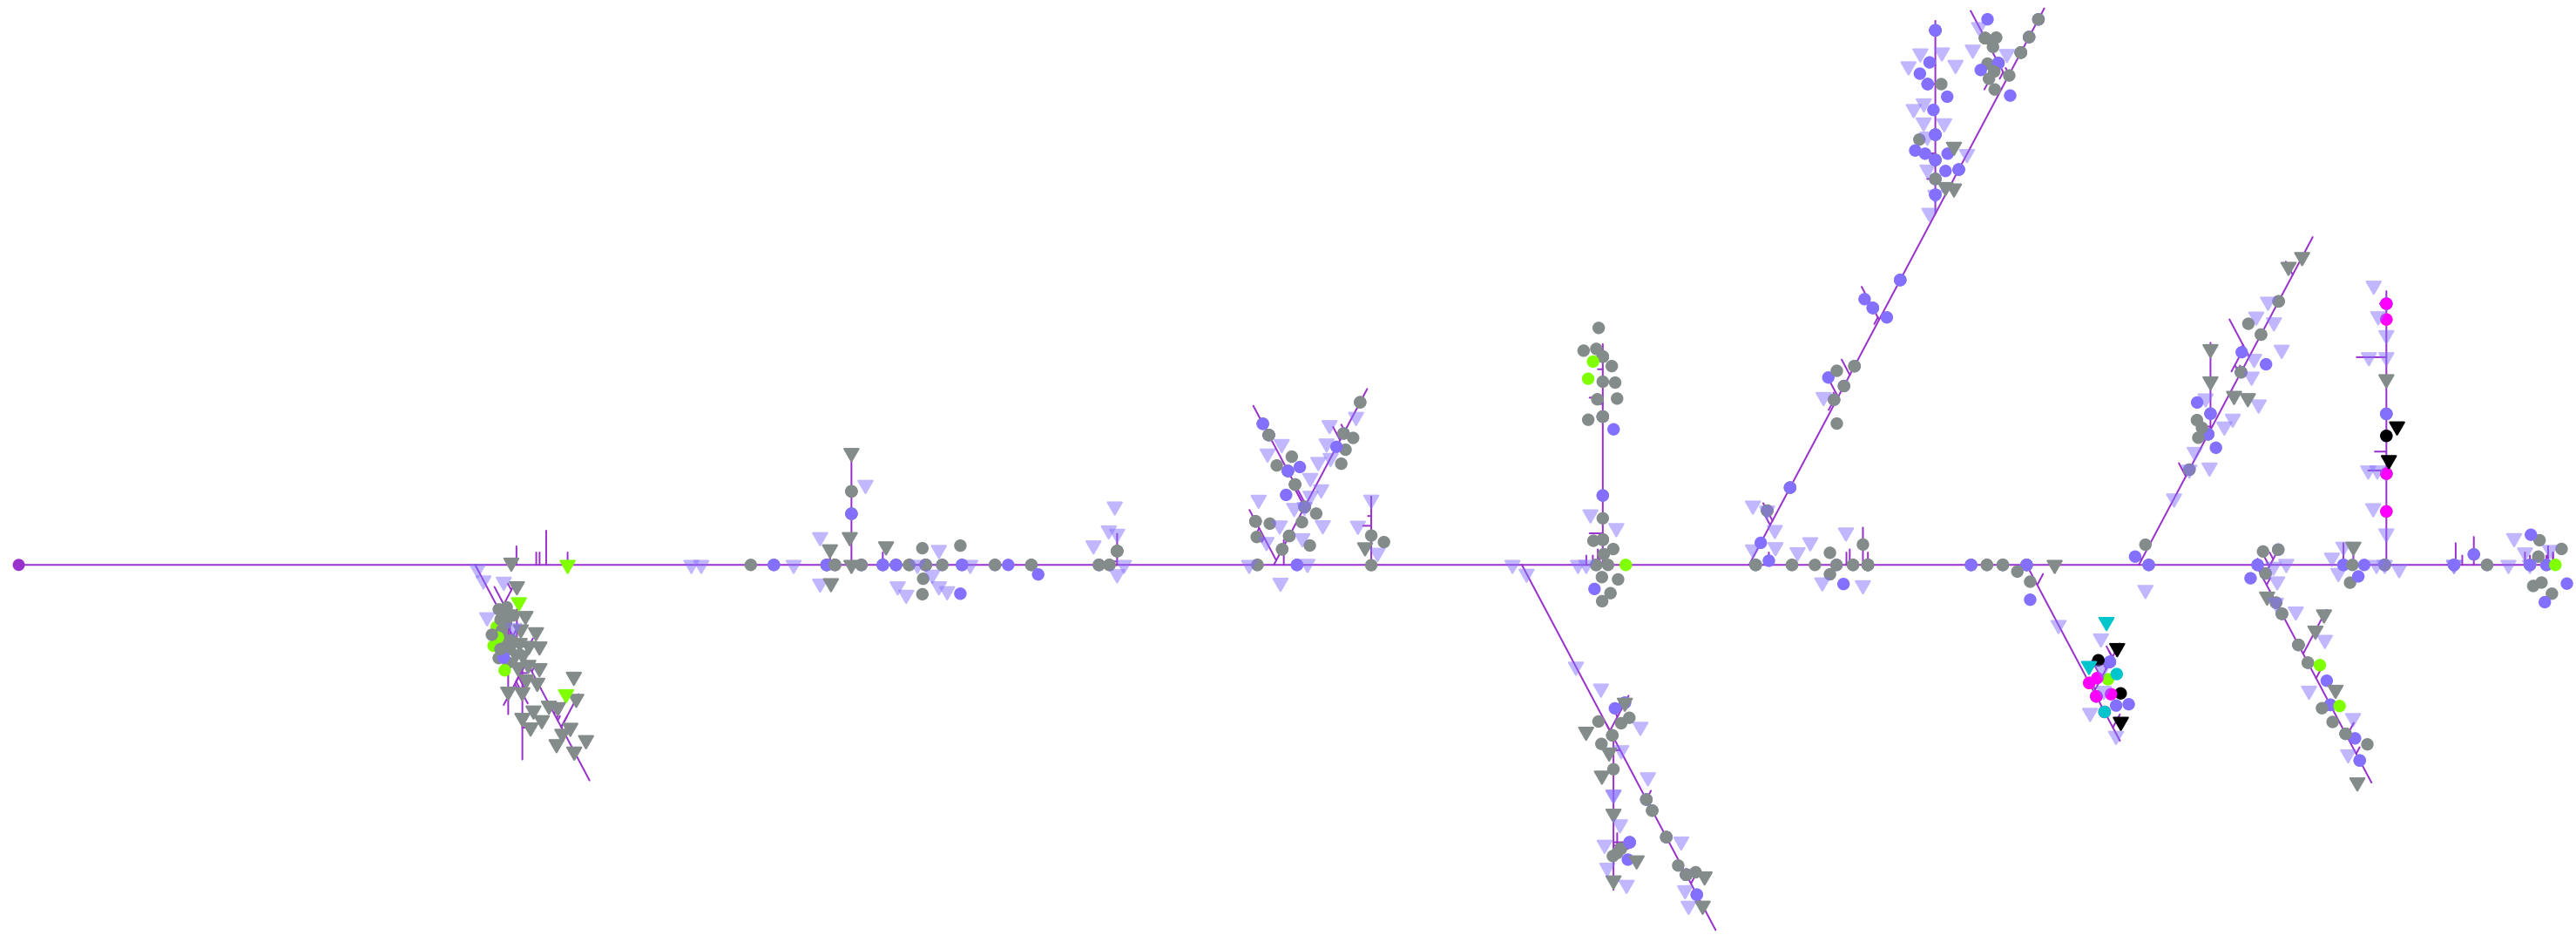

1 claw KC #17 (right)

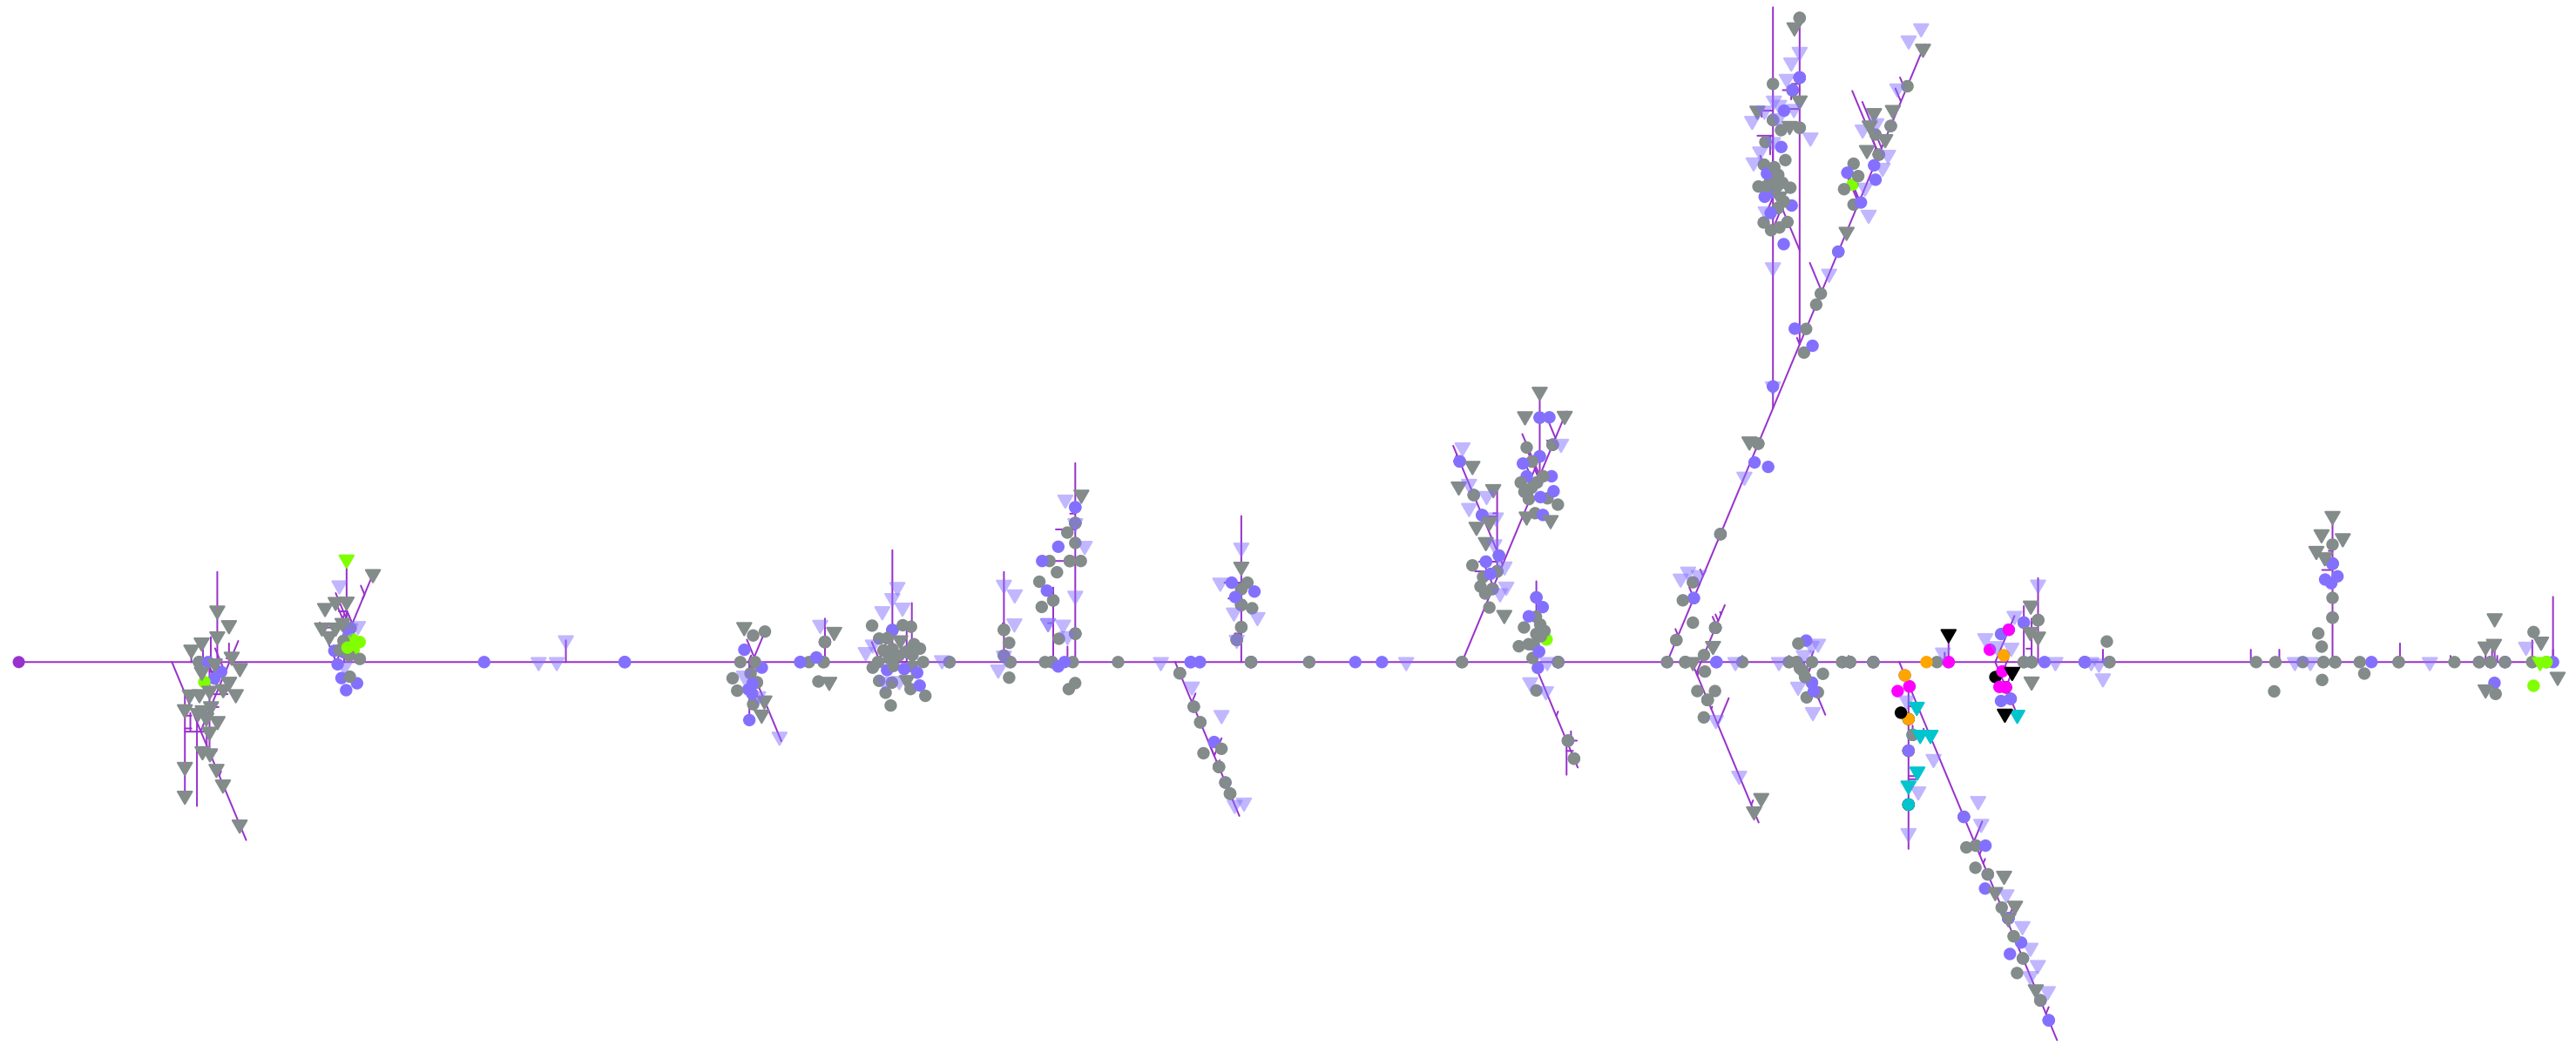

1 claw KC #18 (right)

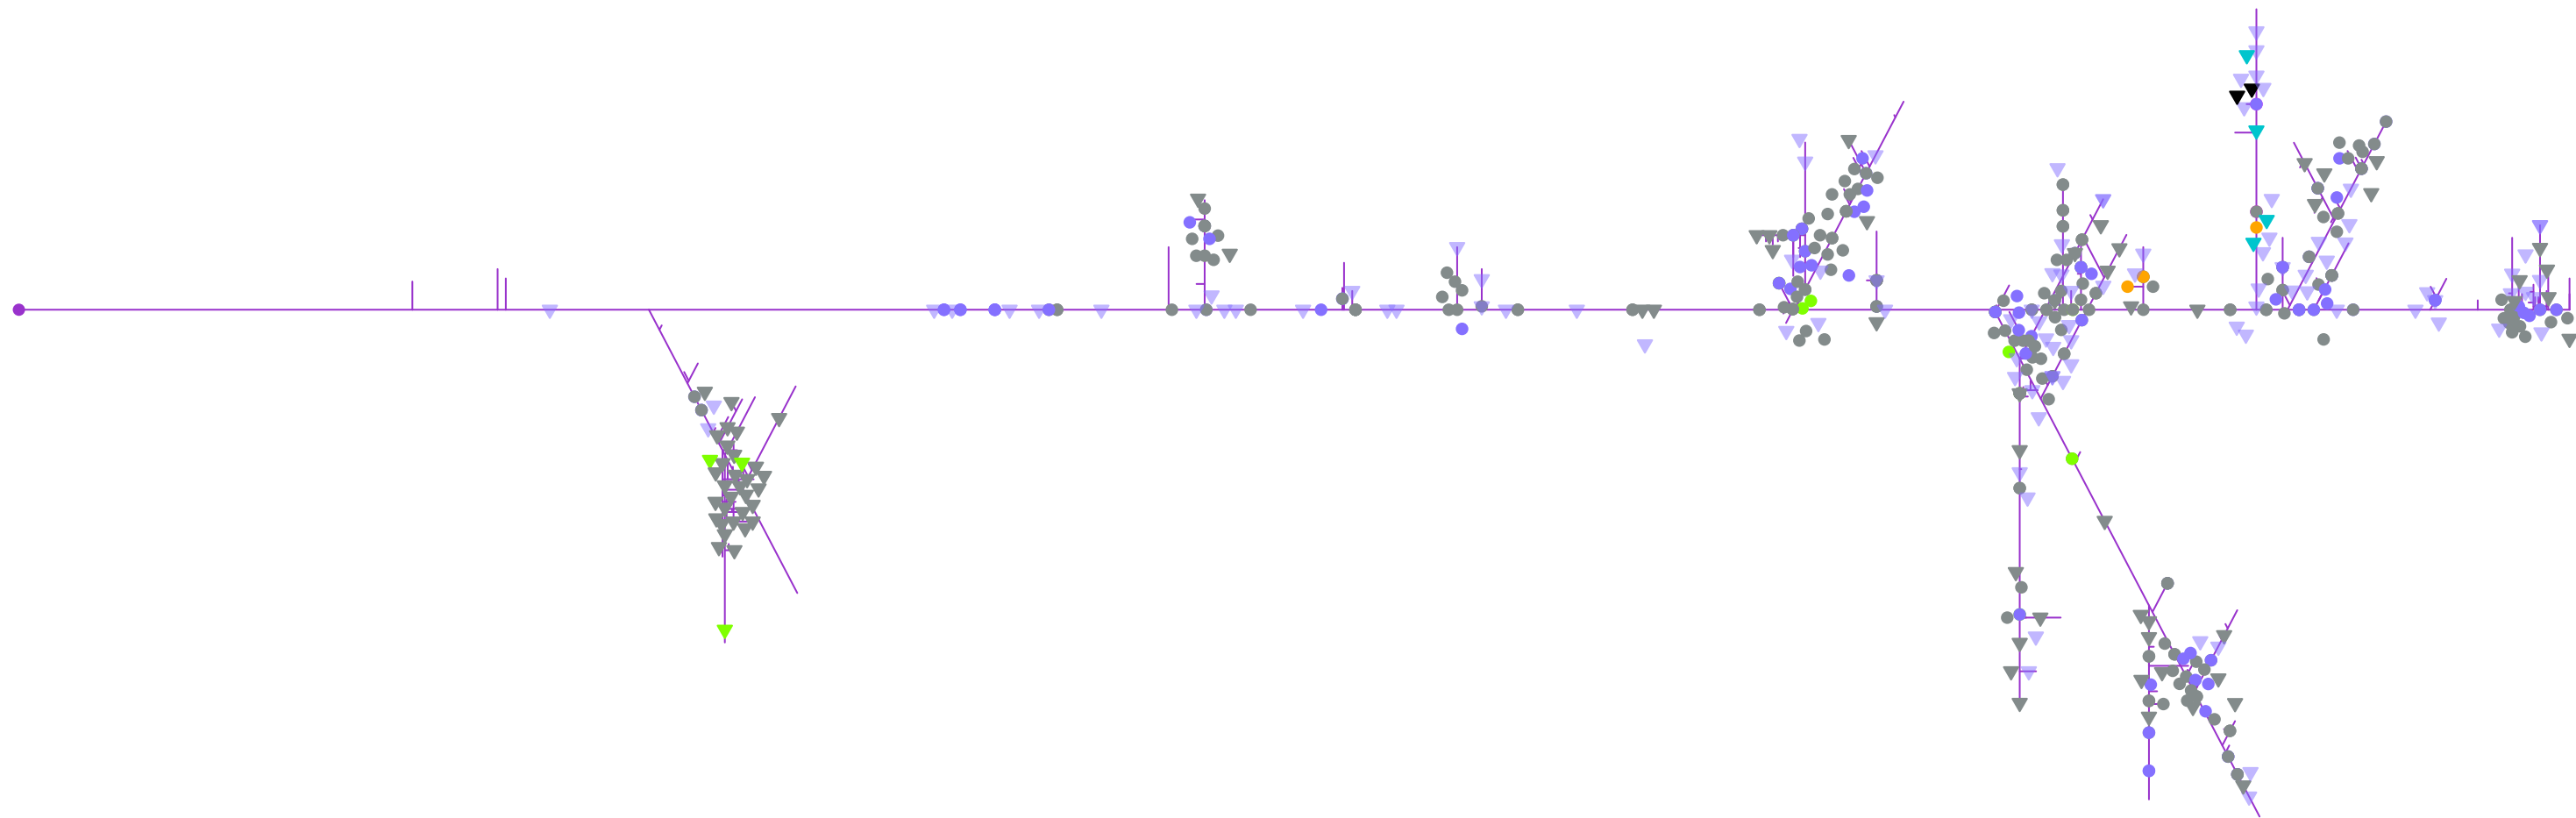

1 claw KC #19 (right)

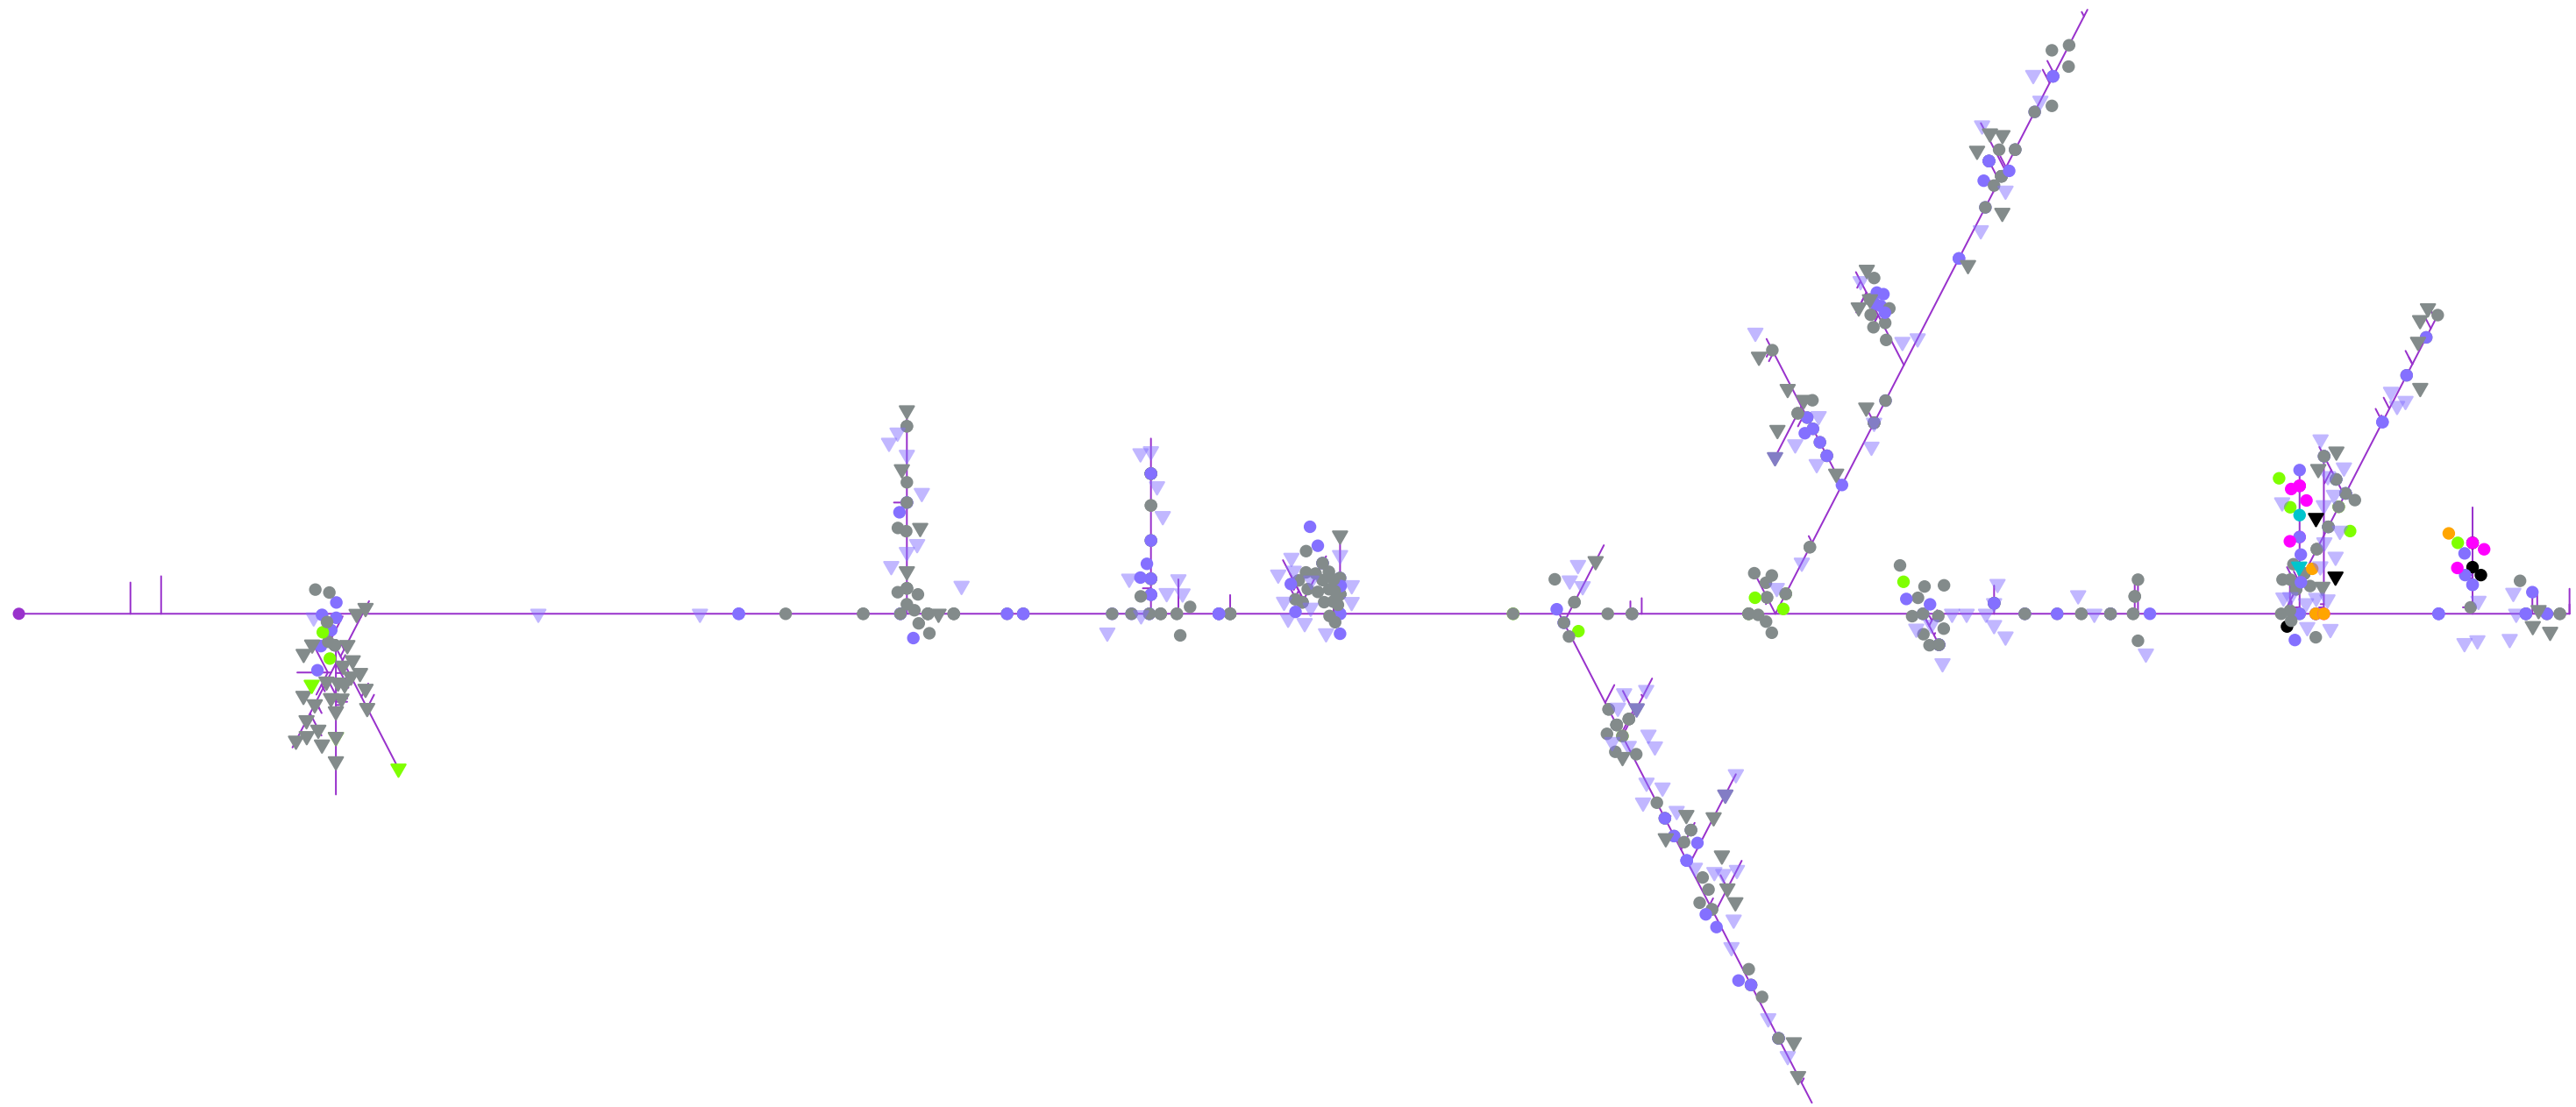



2 claw KC #2 (right)

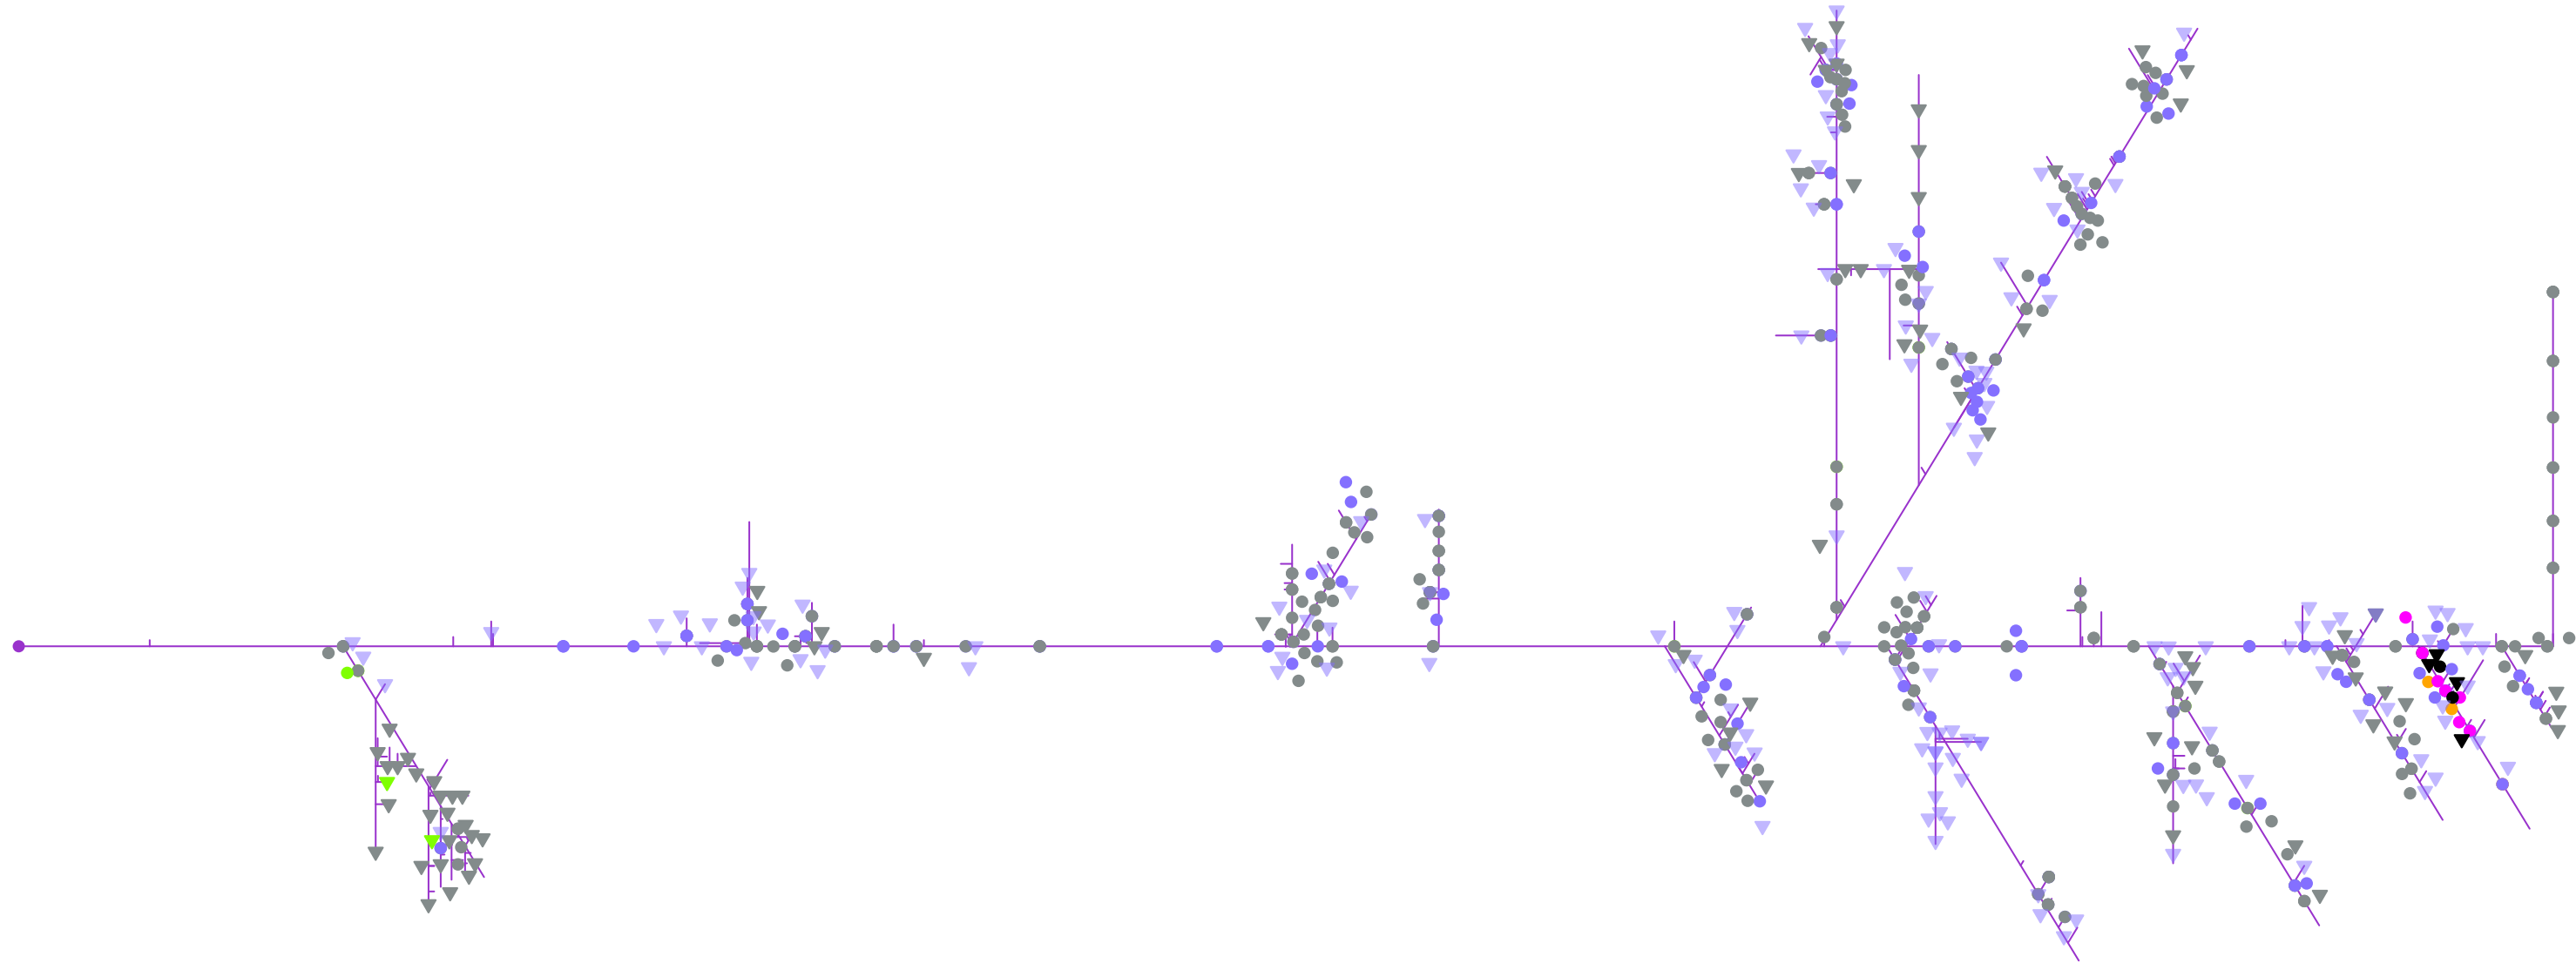

2 claw KC #3 (right)

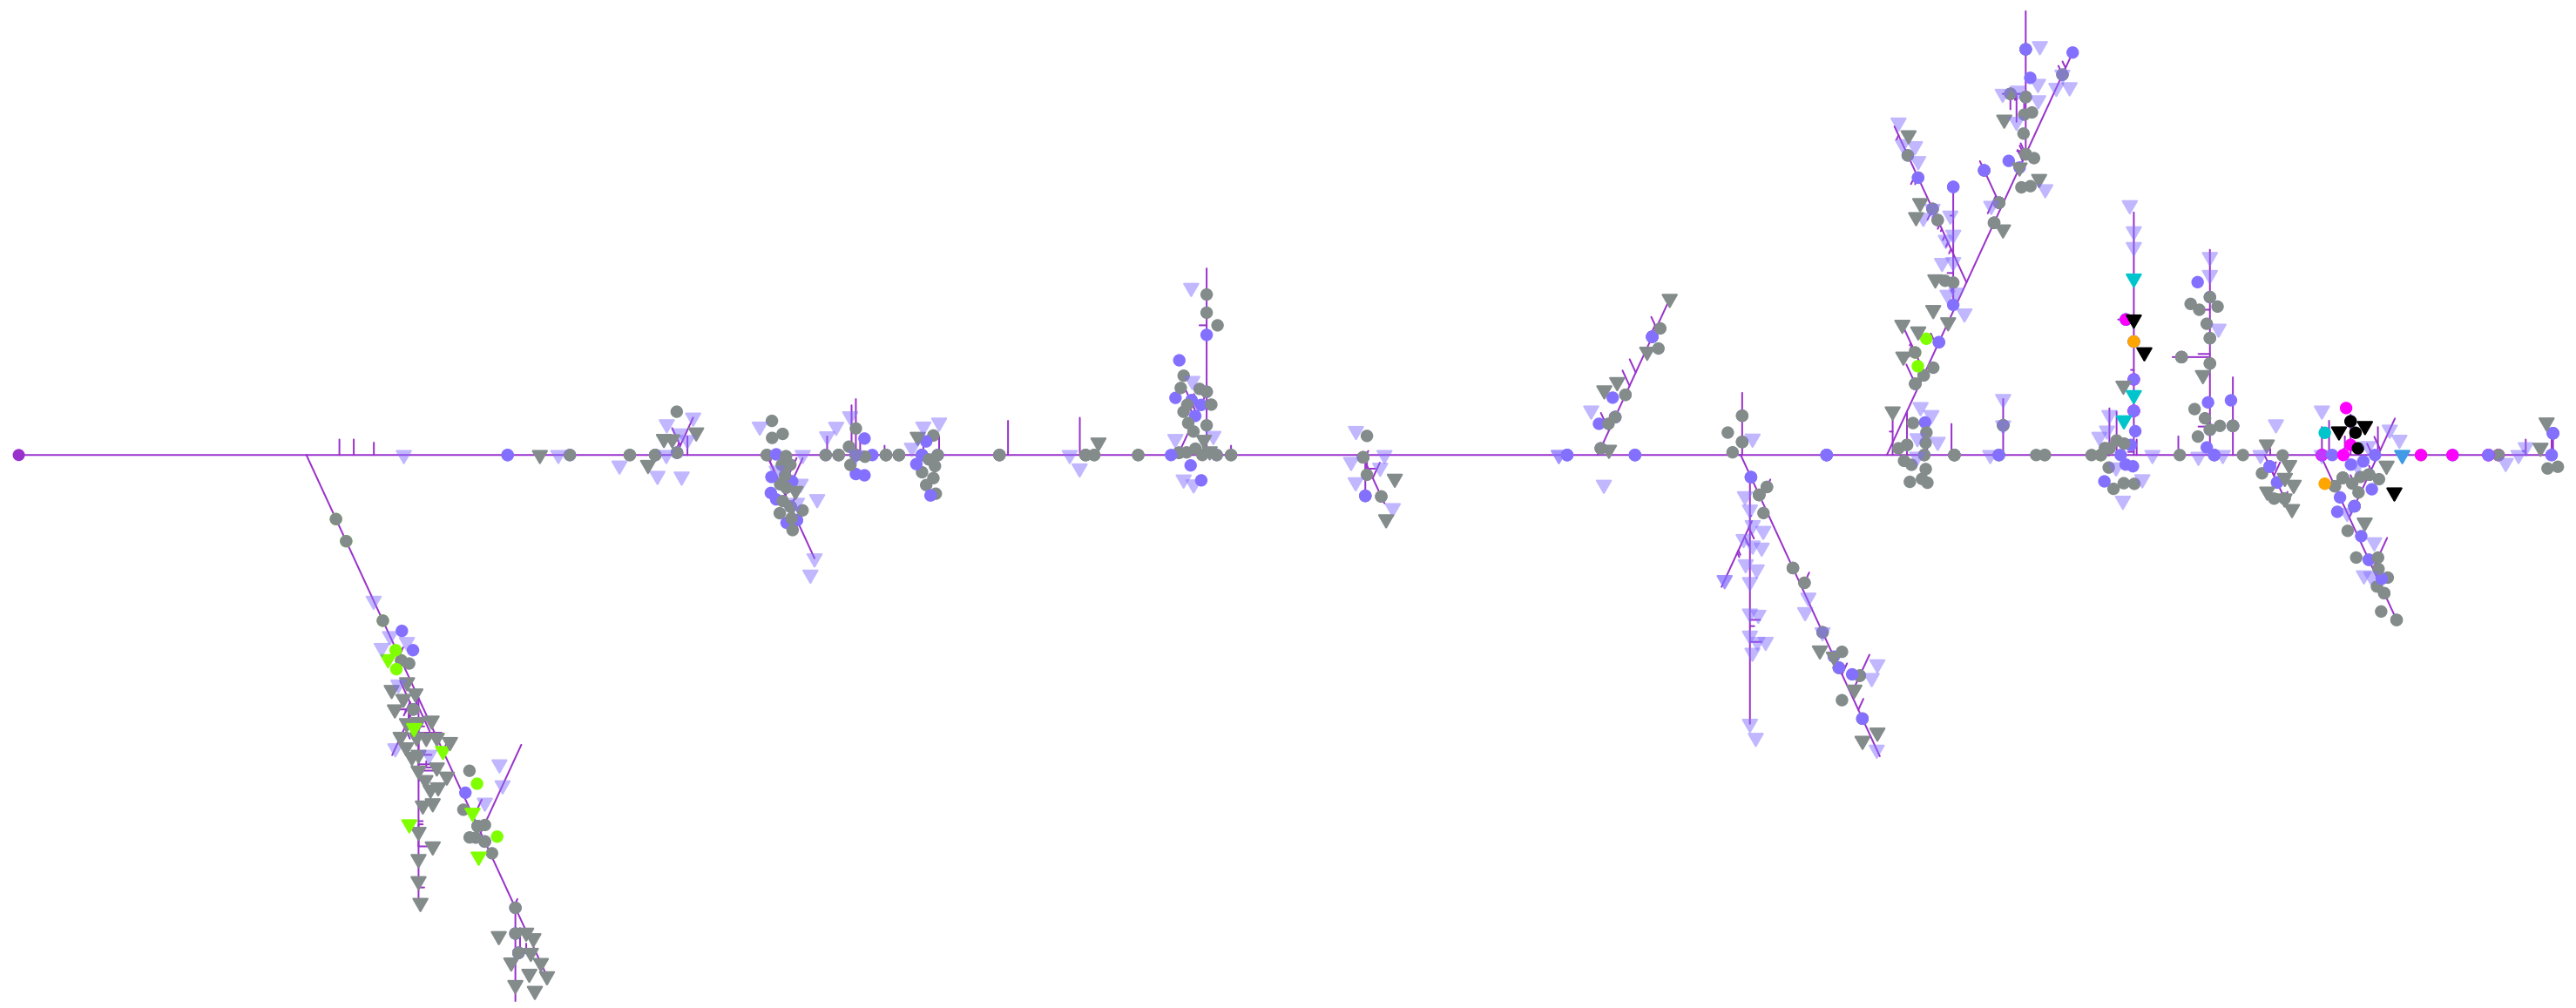



2 claw KC #4 (right)

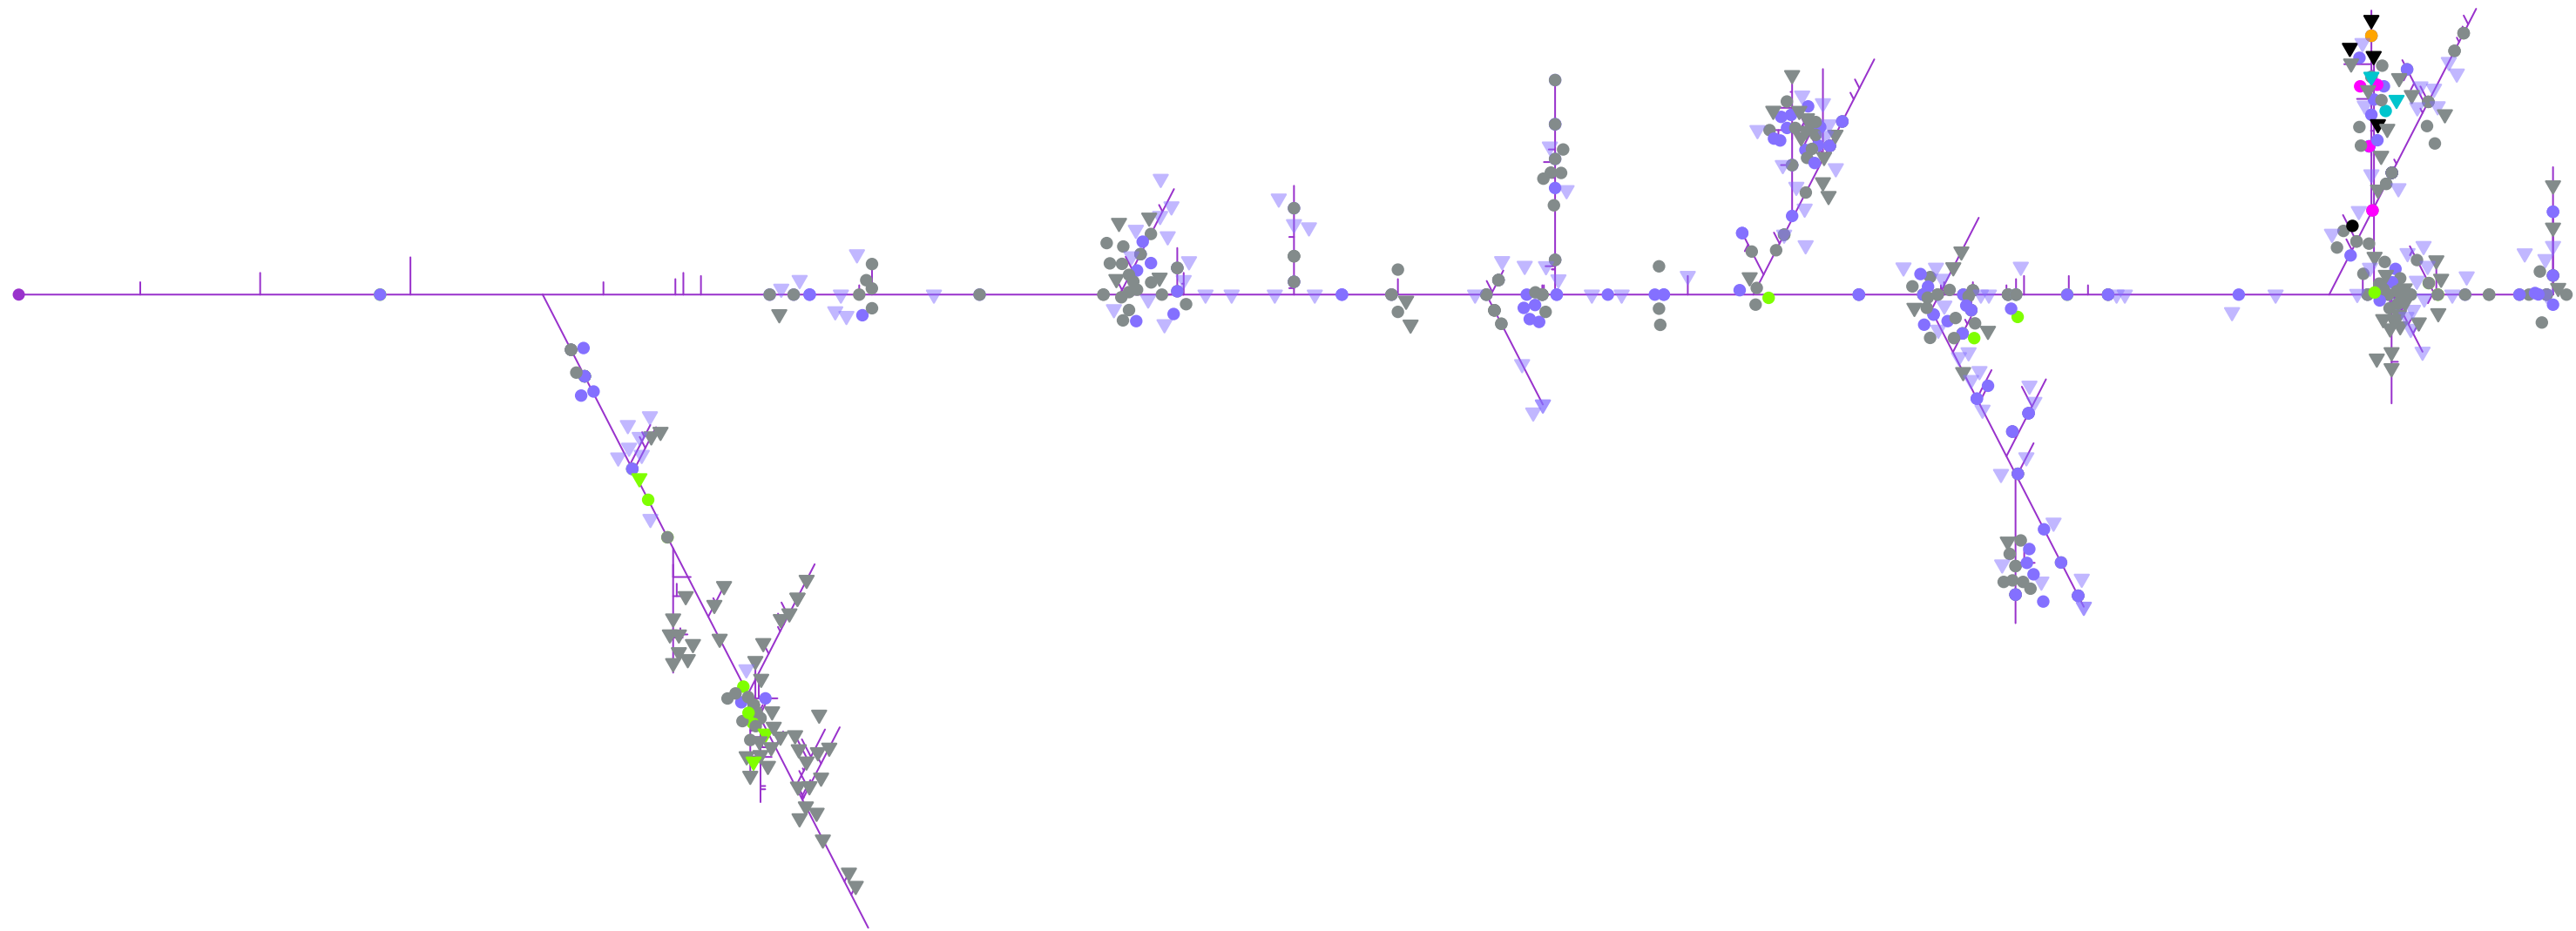

2 claw KC #5 (right)

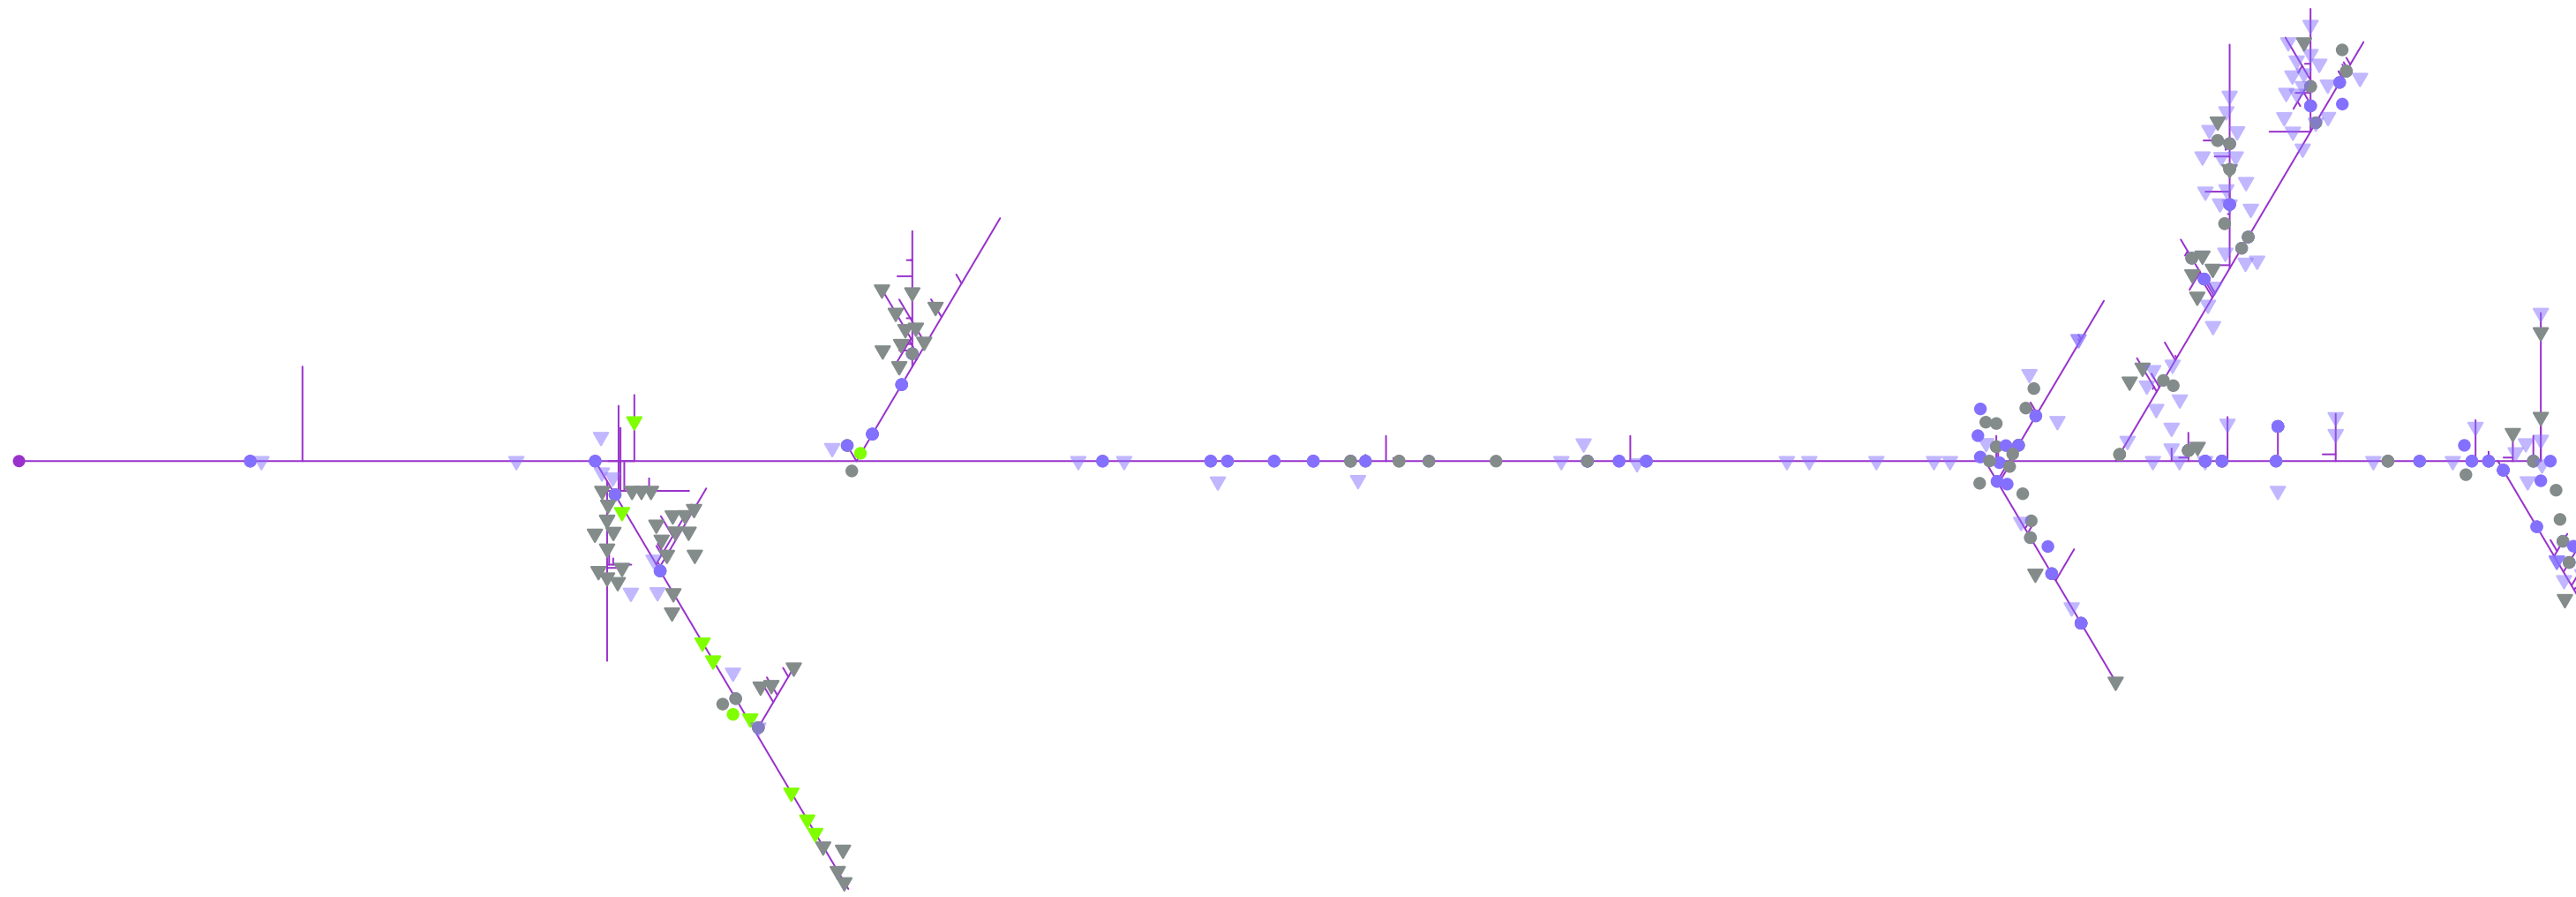

2 claw KC #6 (right)

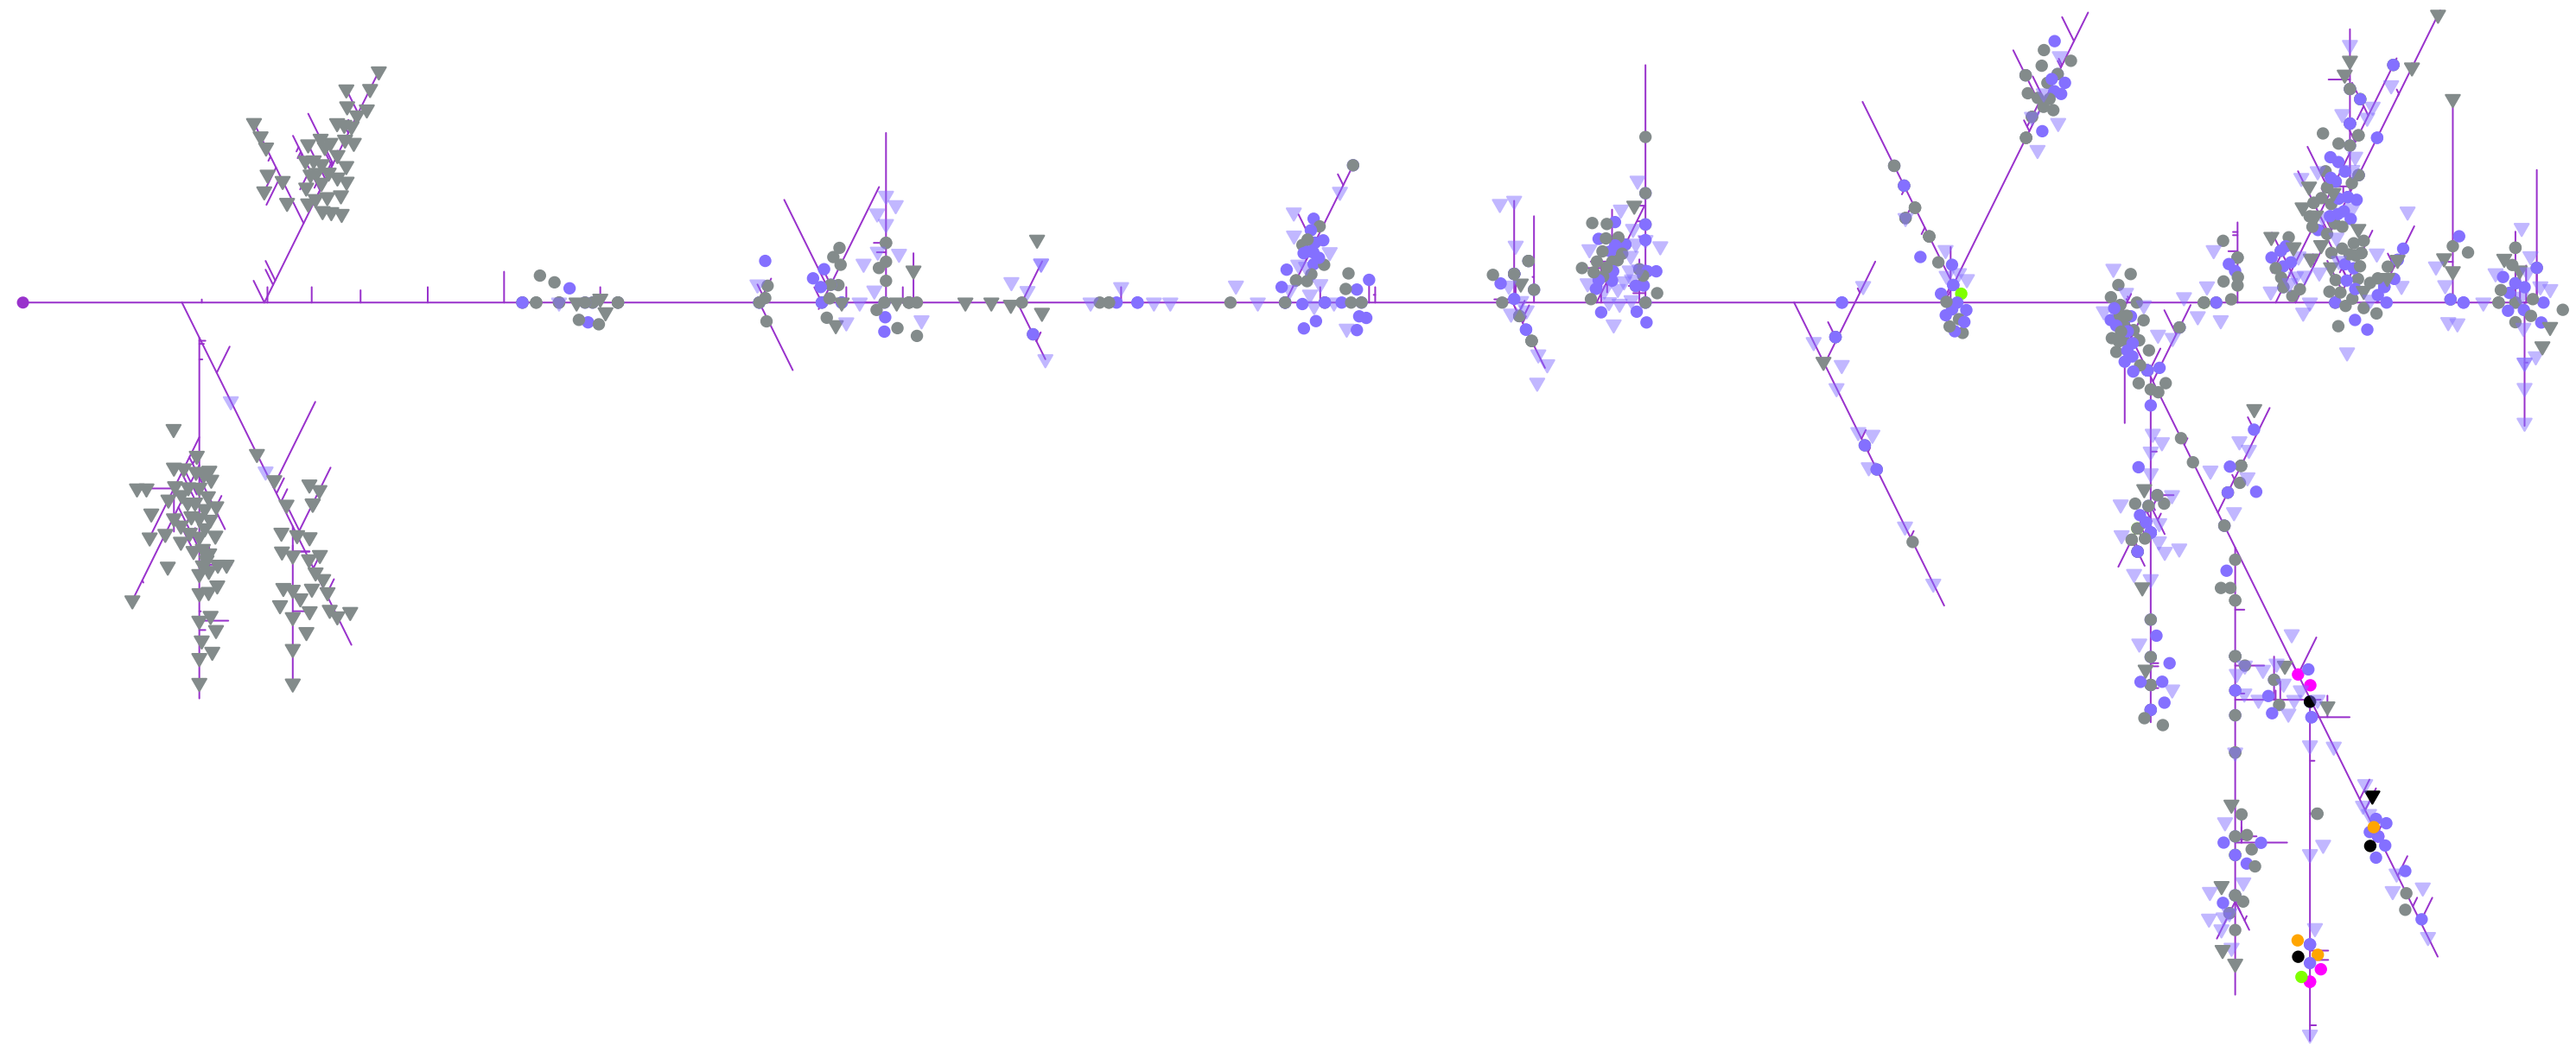

2 claw KC #7 (right)

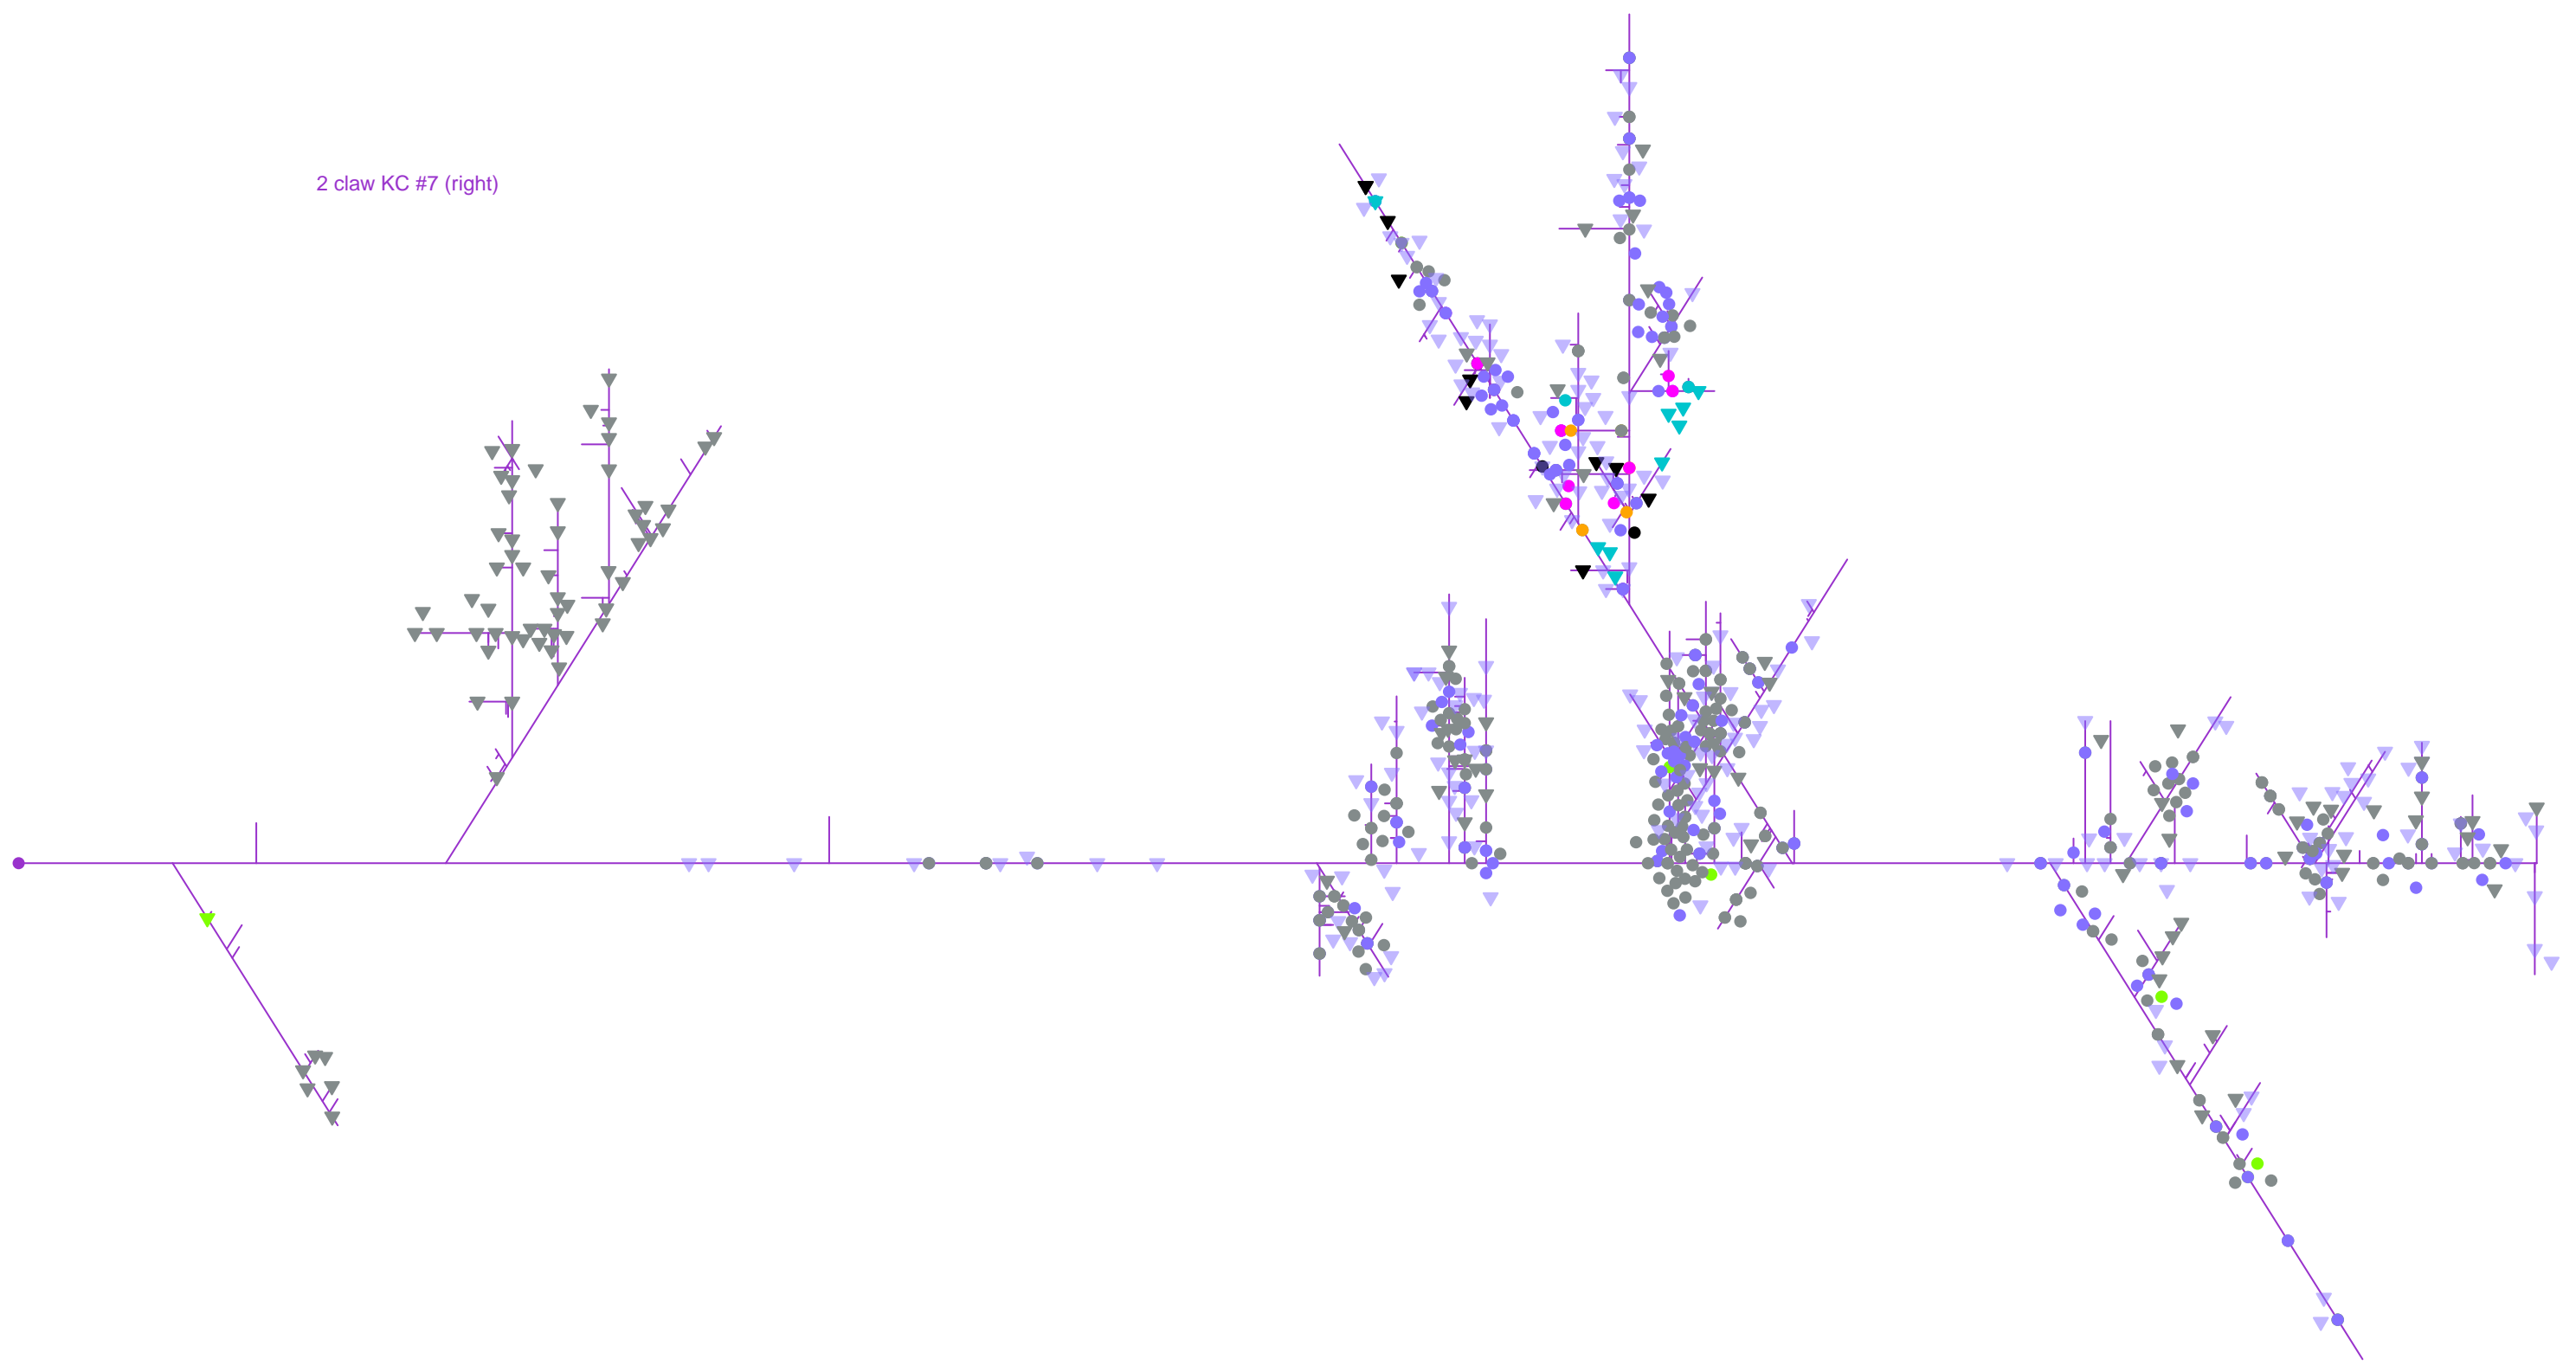

2 claw KC #8 (right)

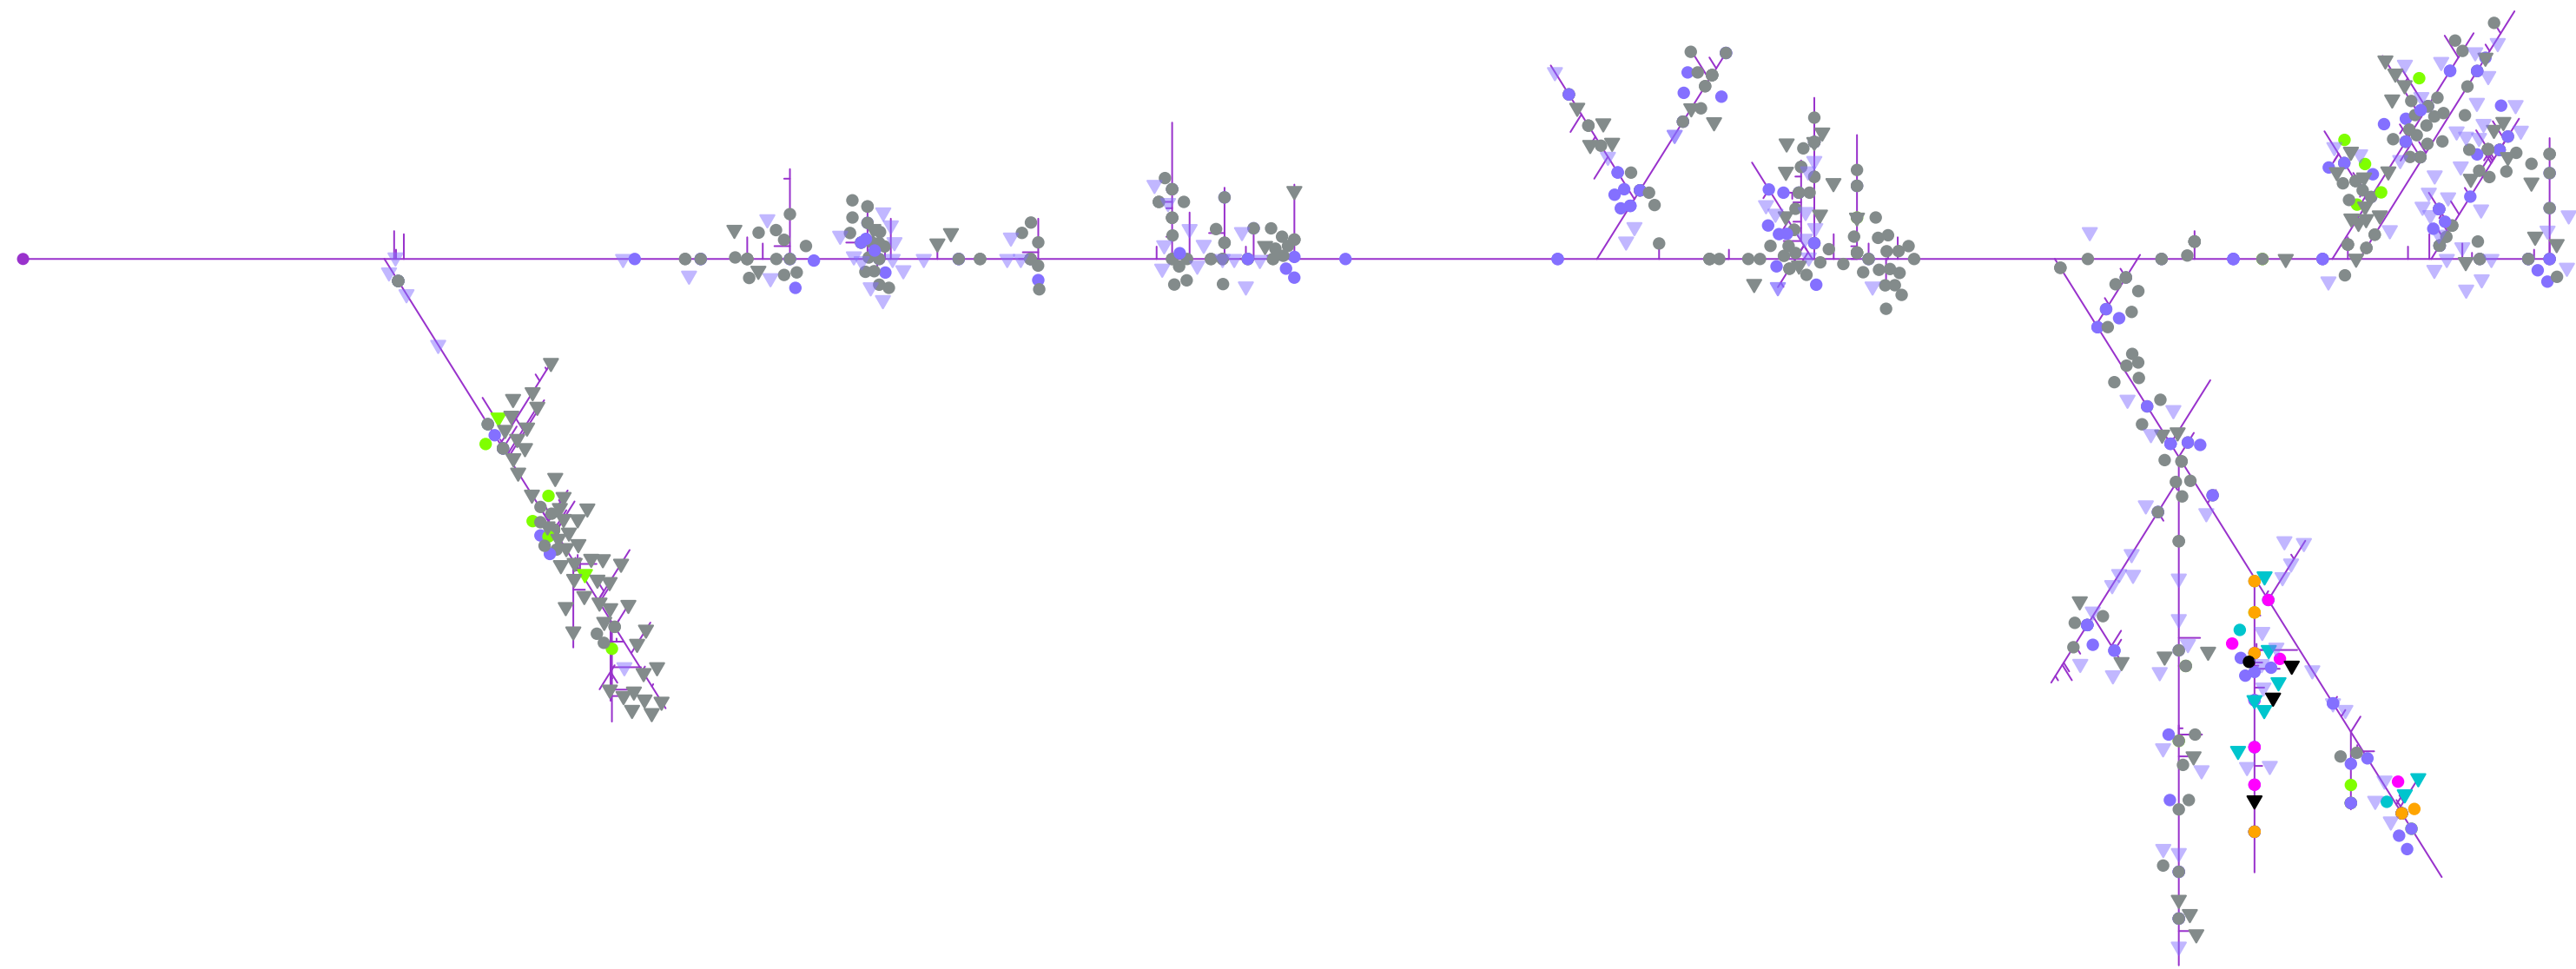

2 claw KC #9 (right)

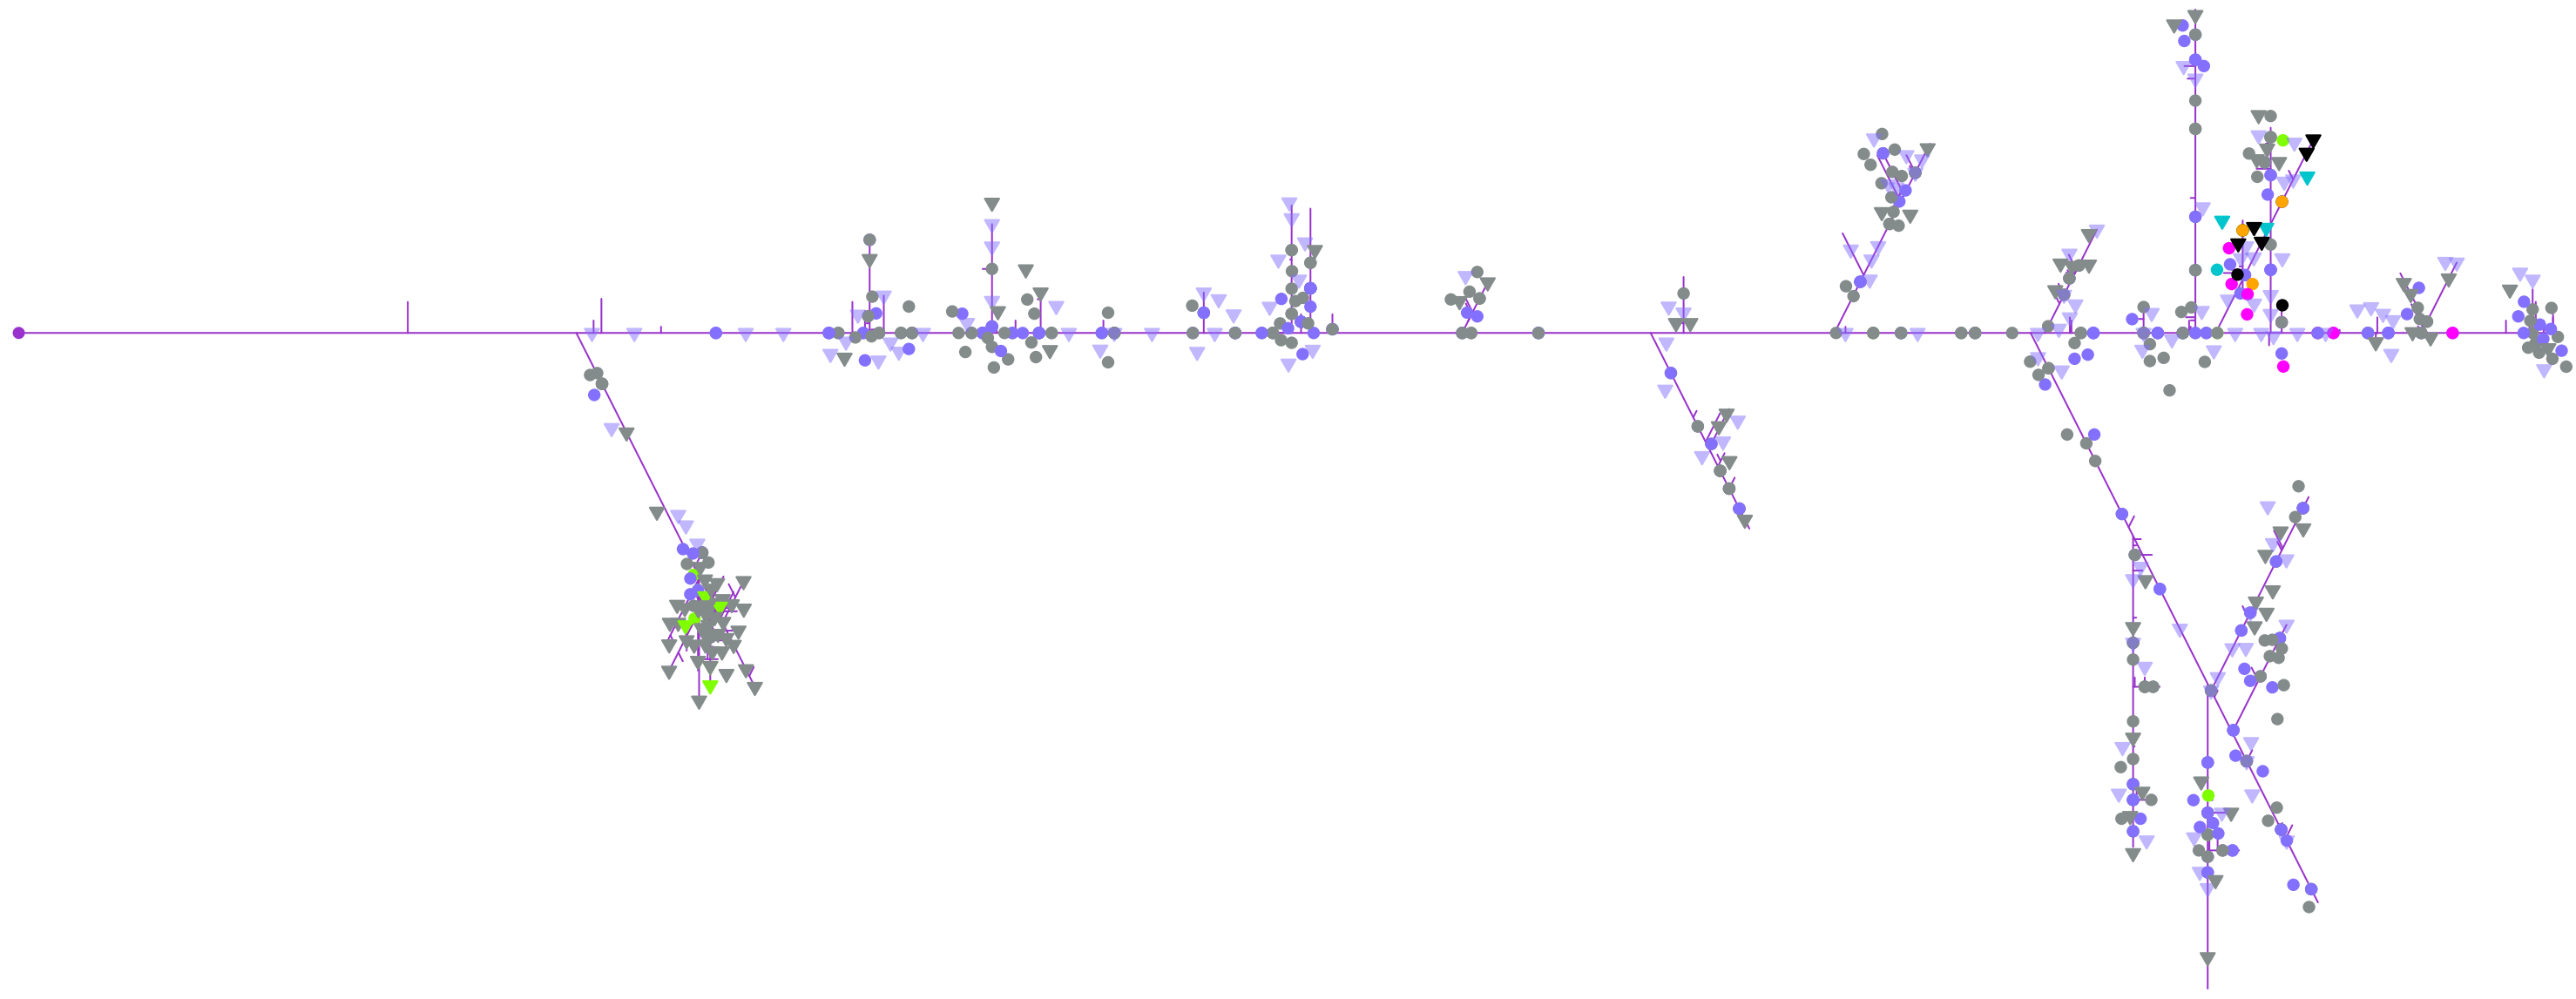

3 claw KC #1 (right)

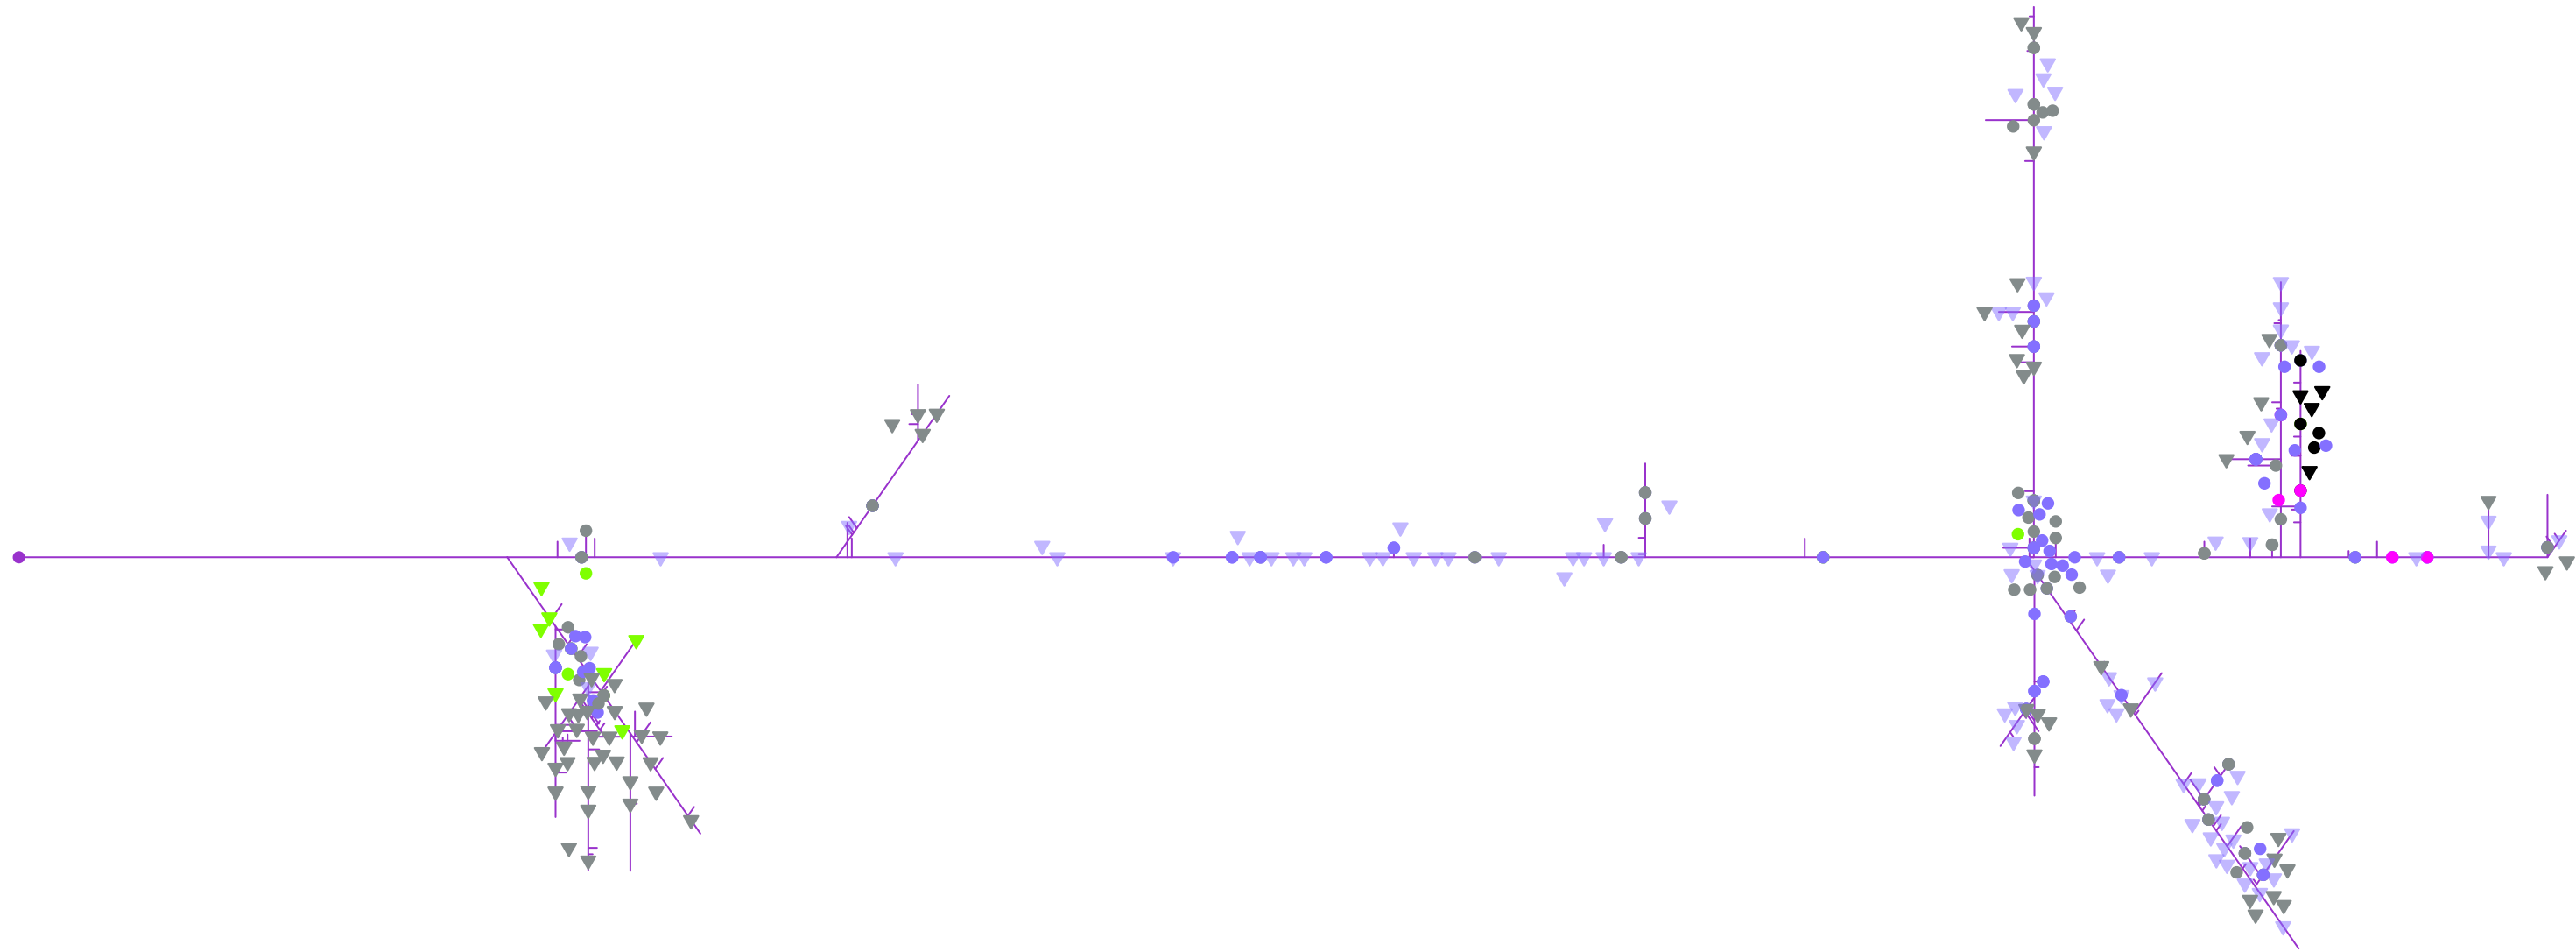

3 claw KC #2 (right)

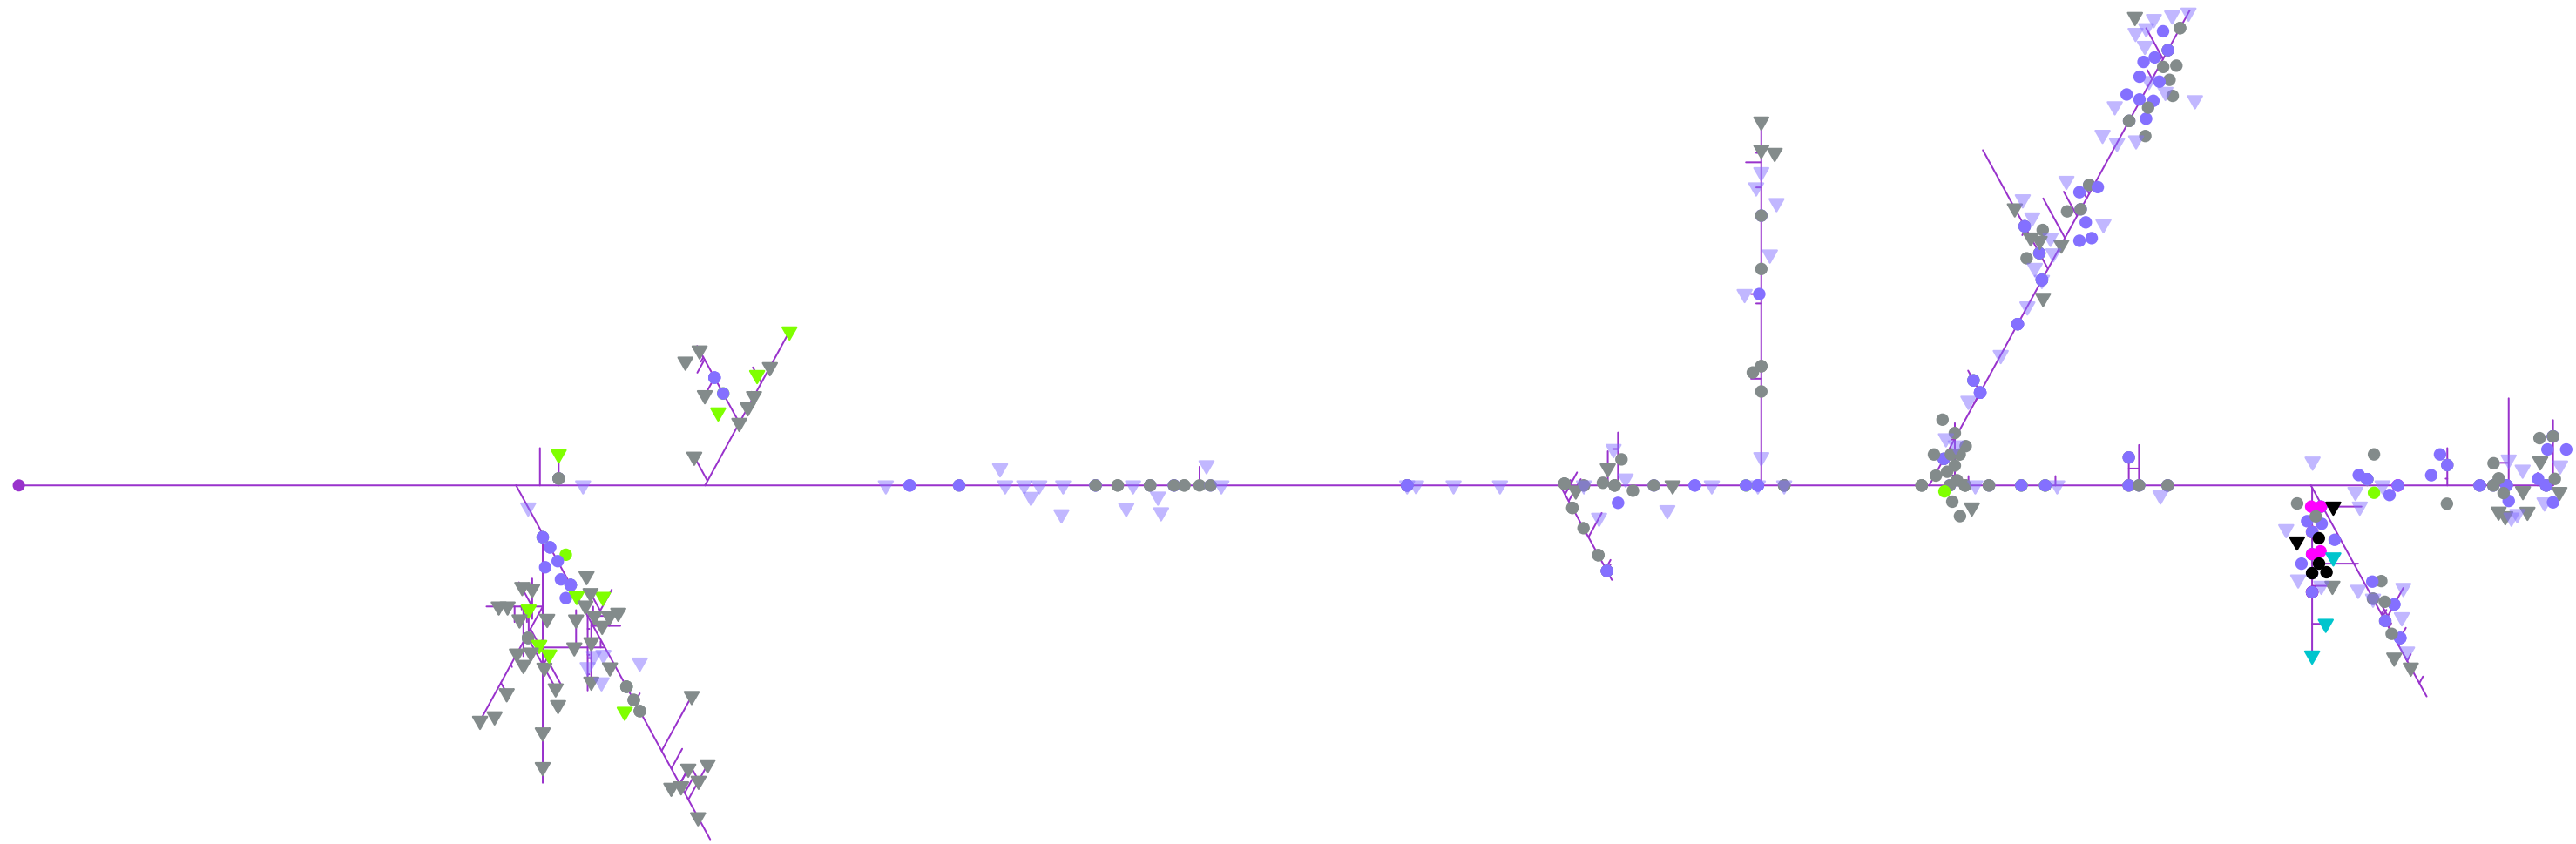



3 claw KC #3 (right)

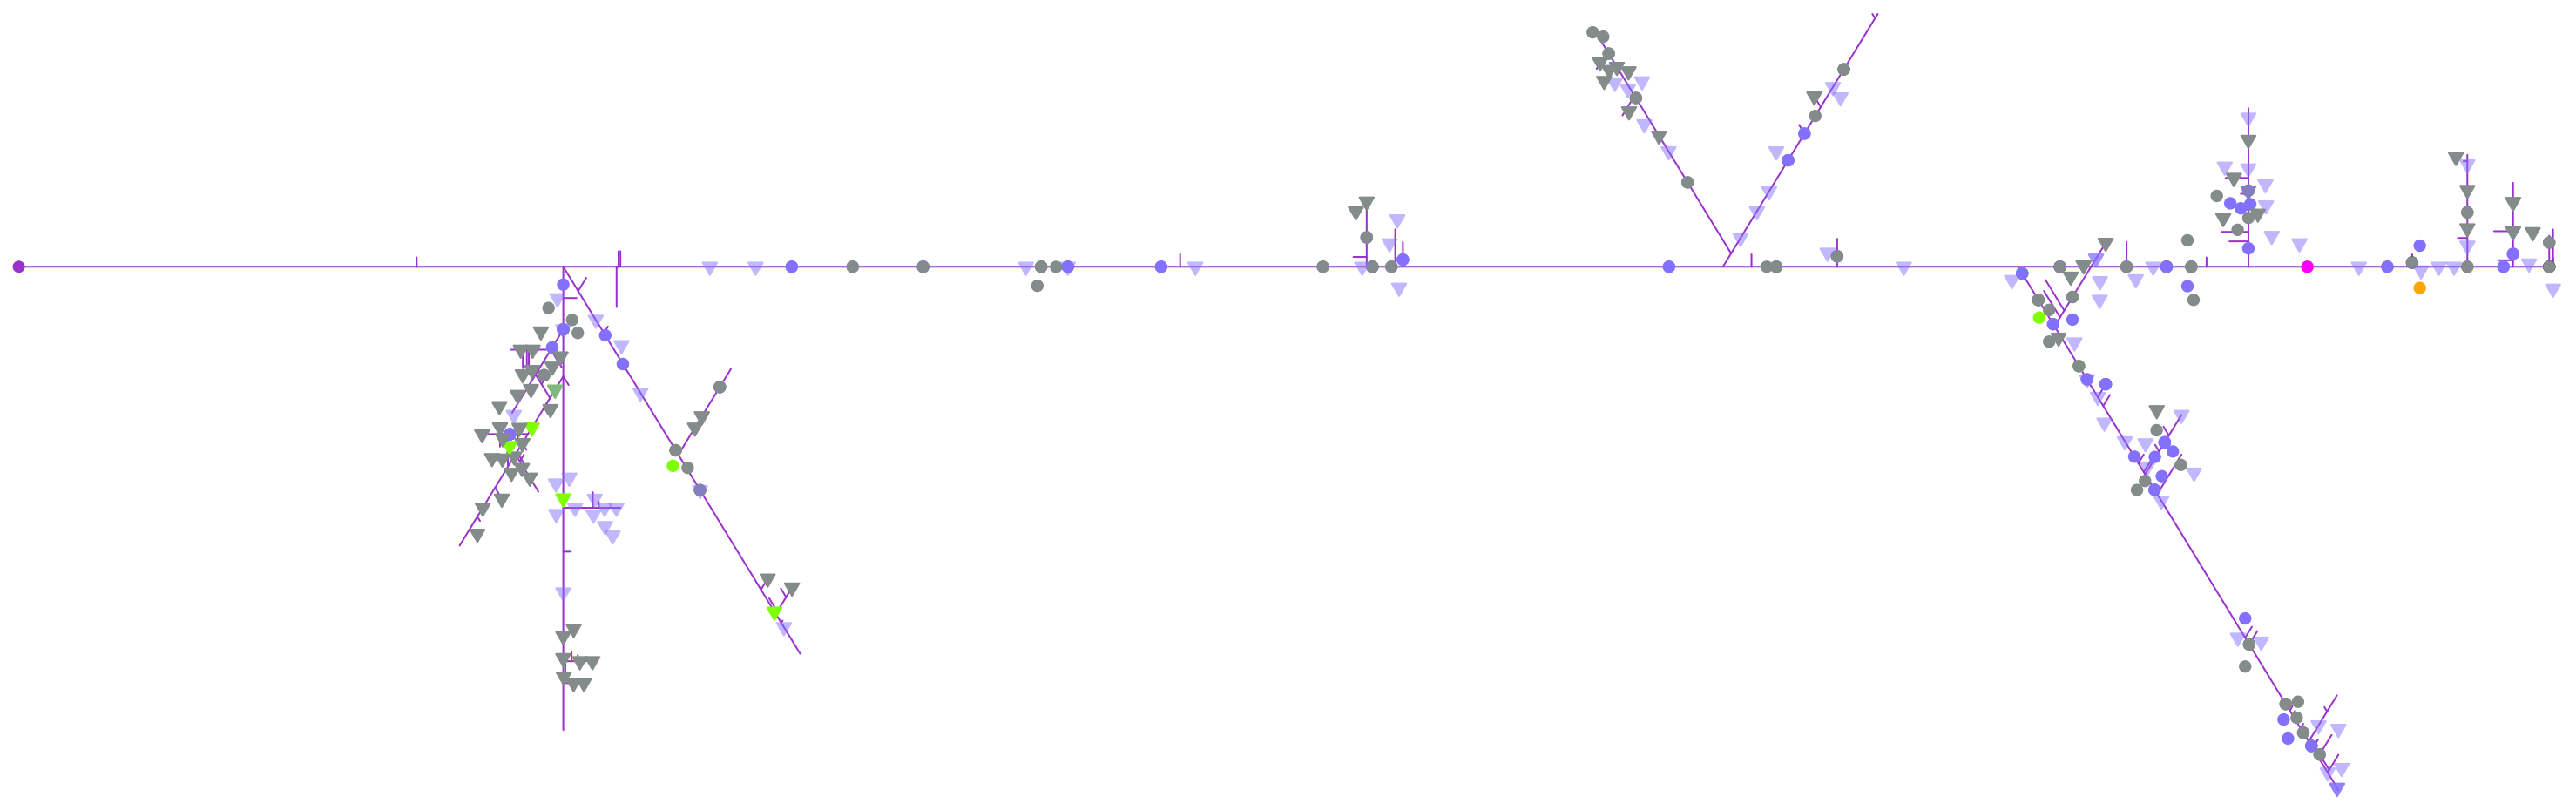

3 claw KC #4 (right)

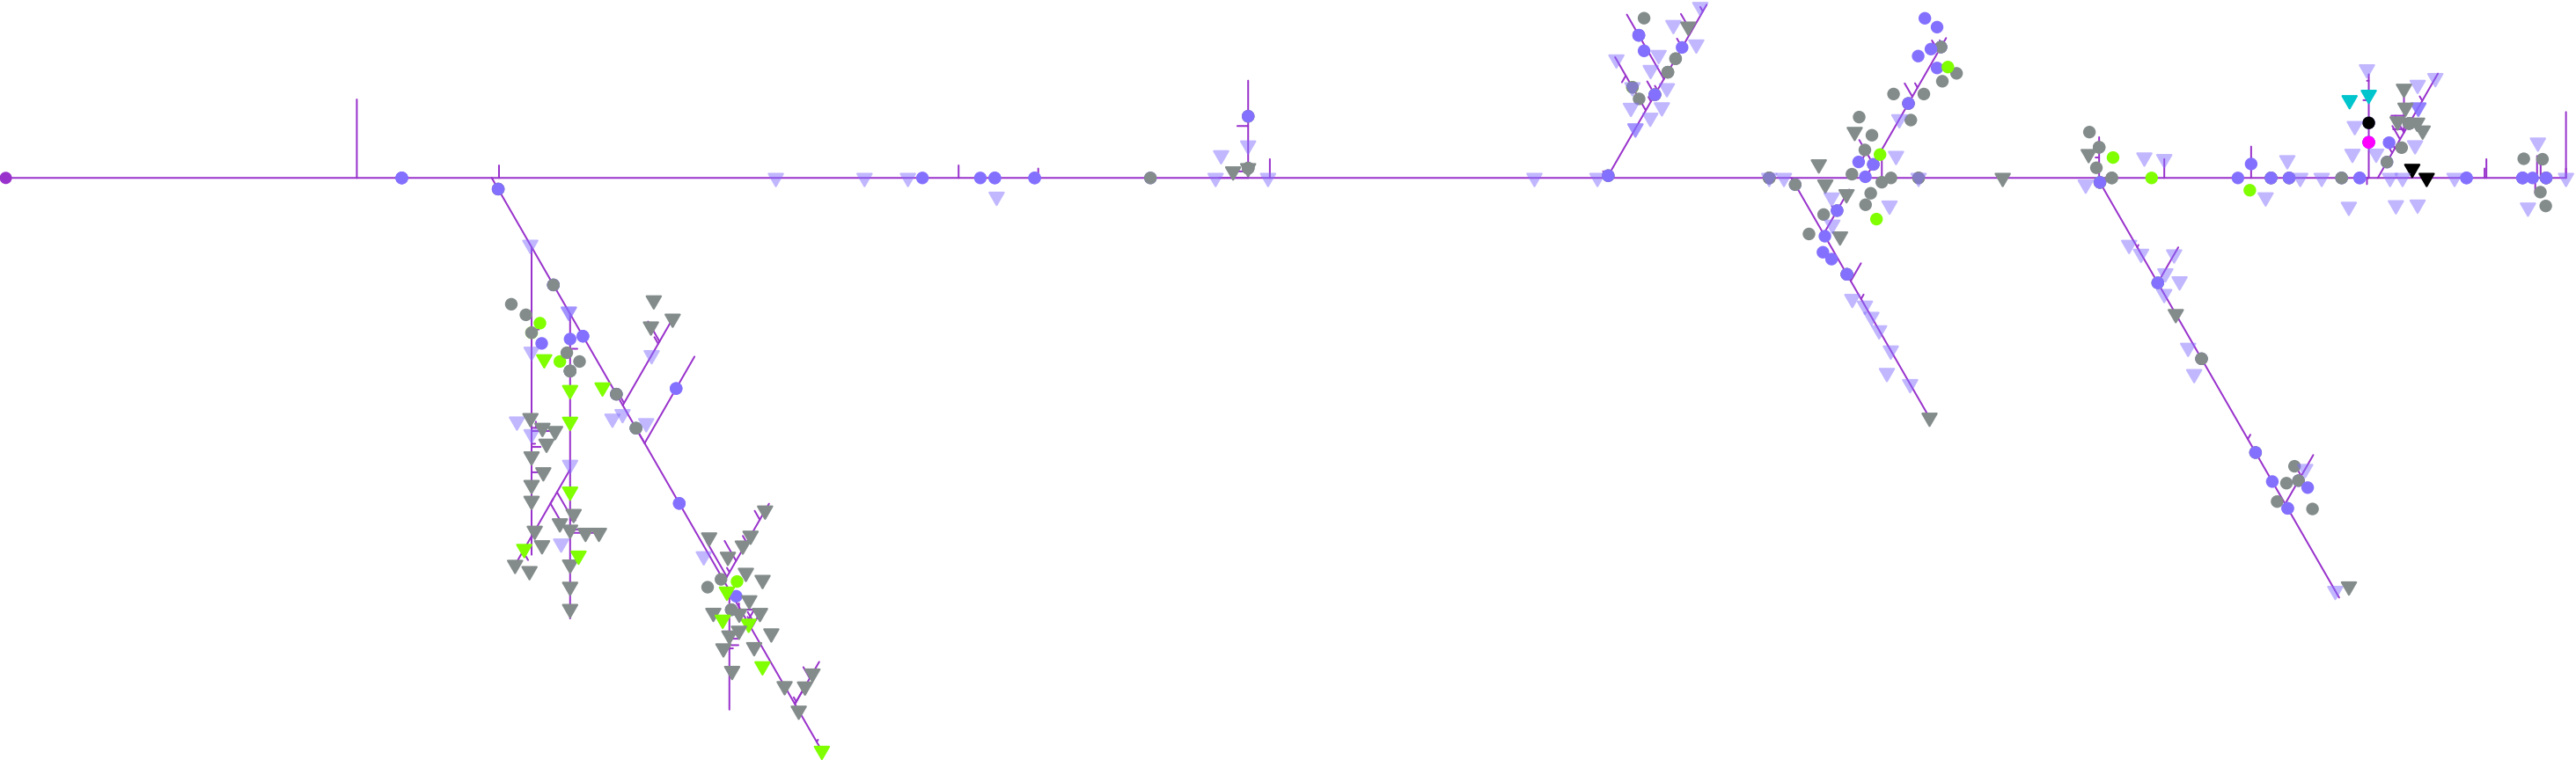

3 claw KC #5 (right)

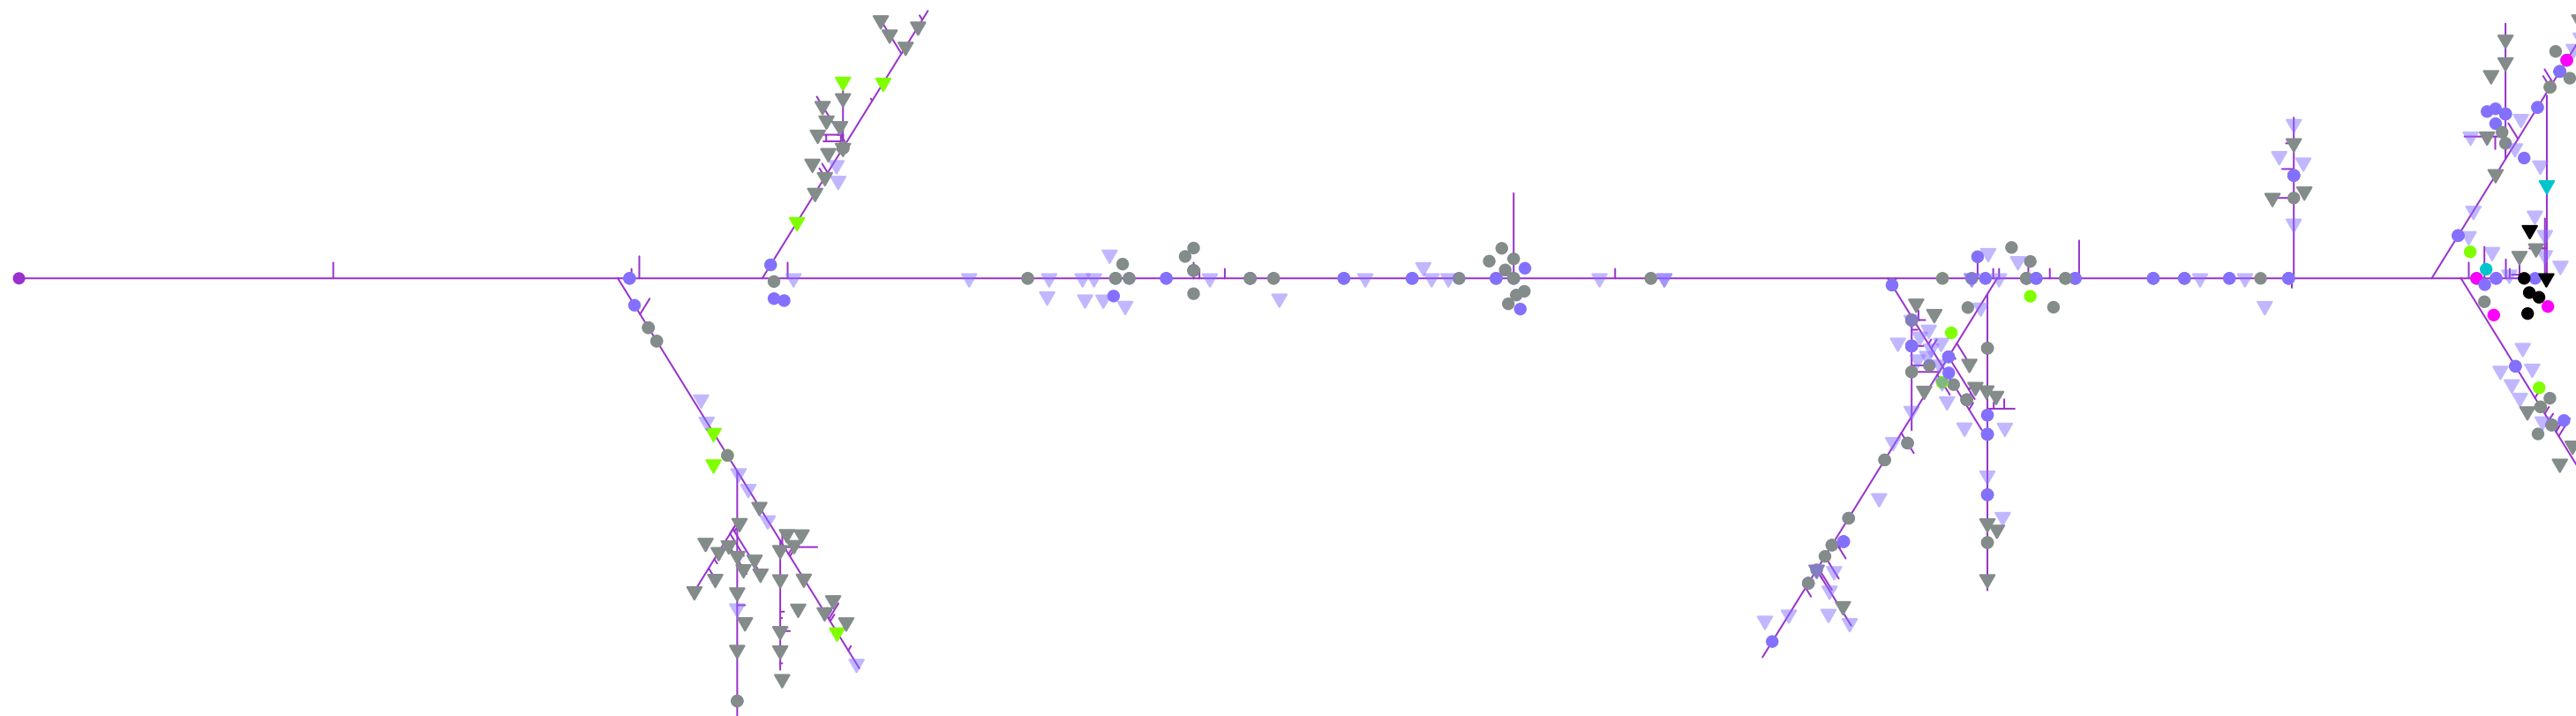

3 claw KC #6 (right)

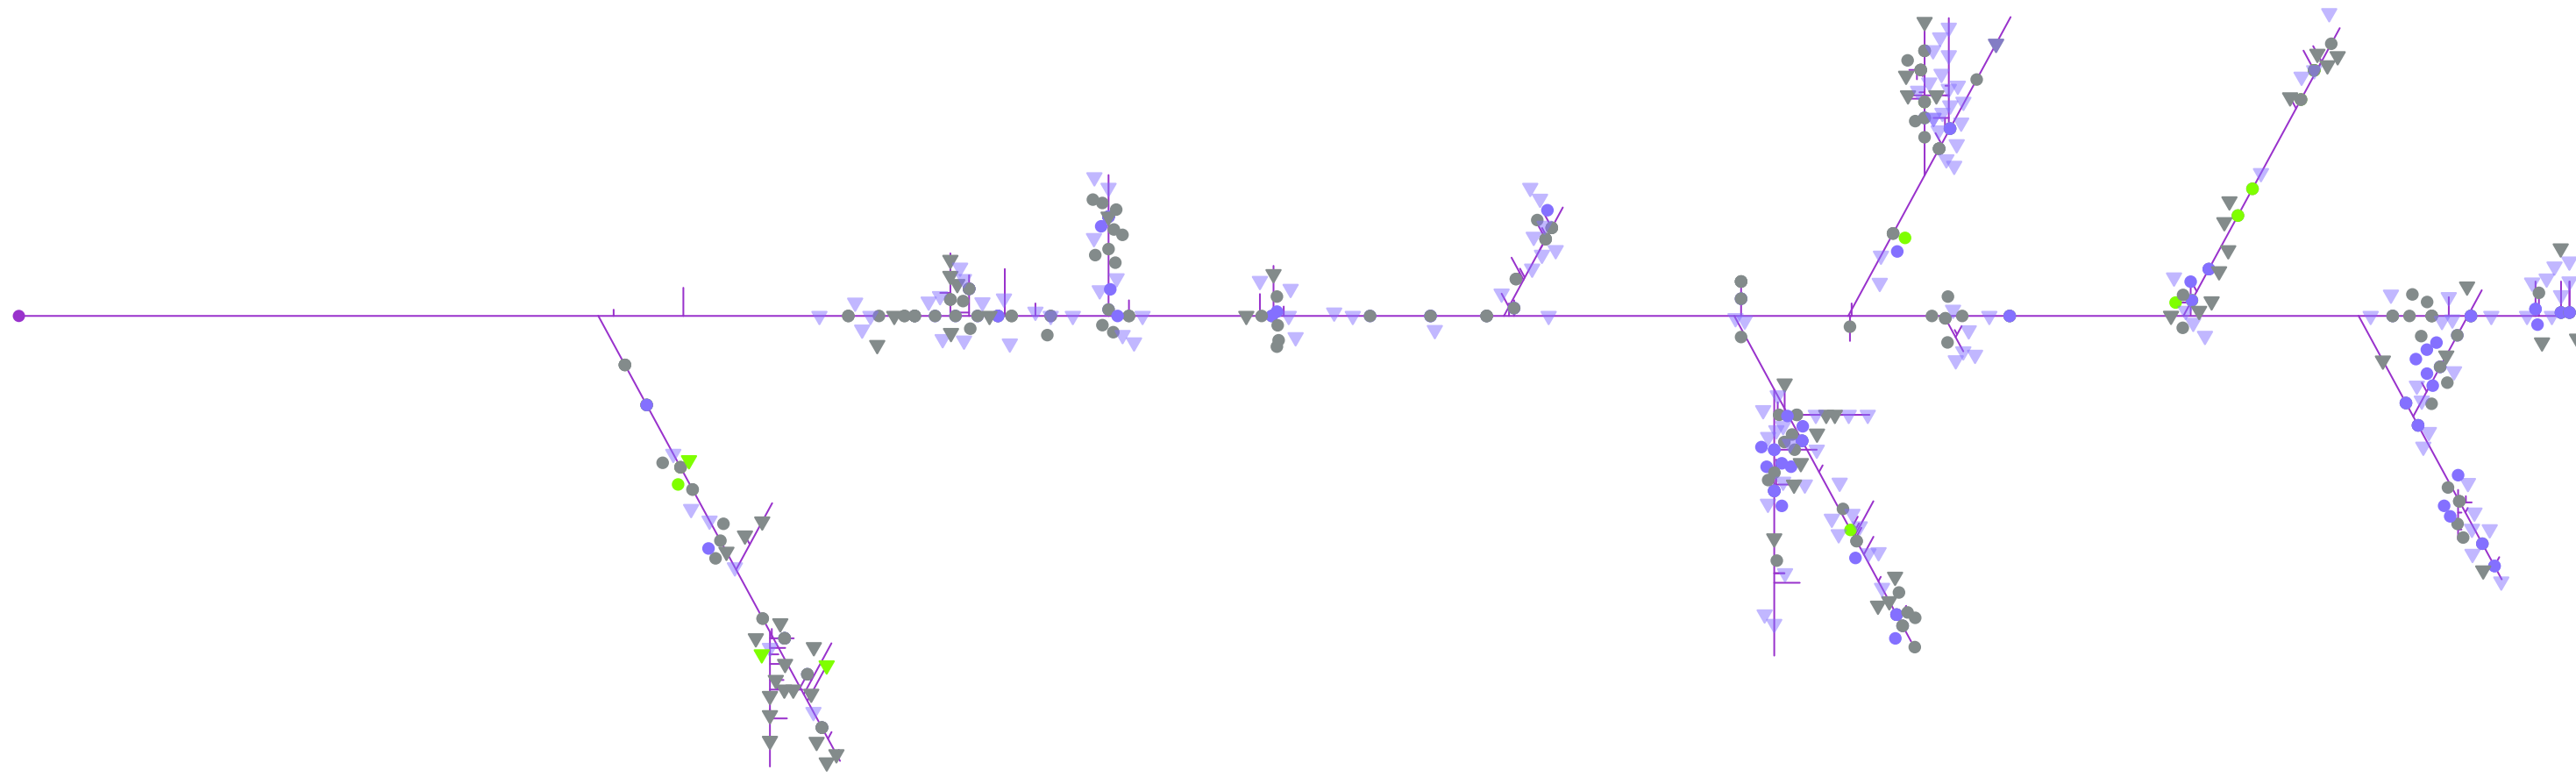

3 claw KC #7 (right)

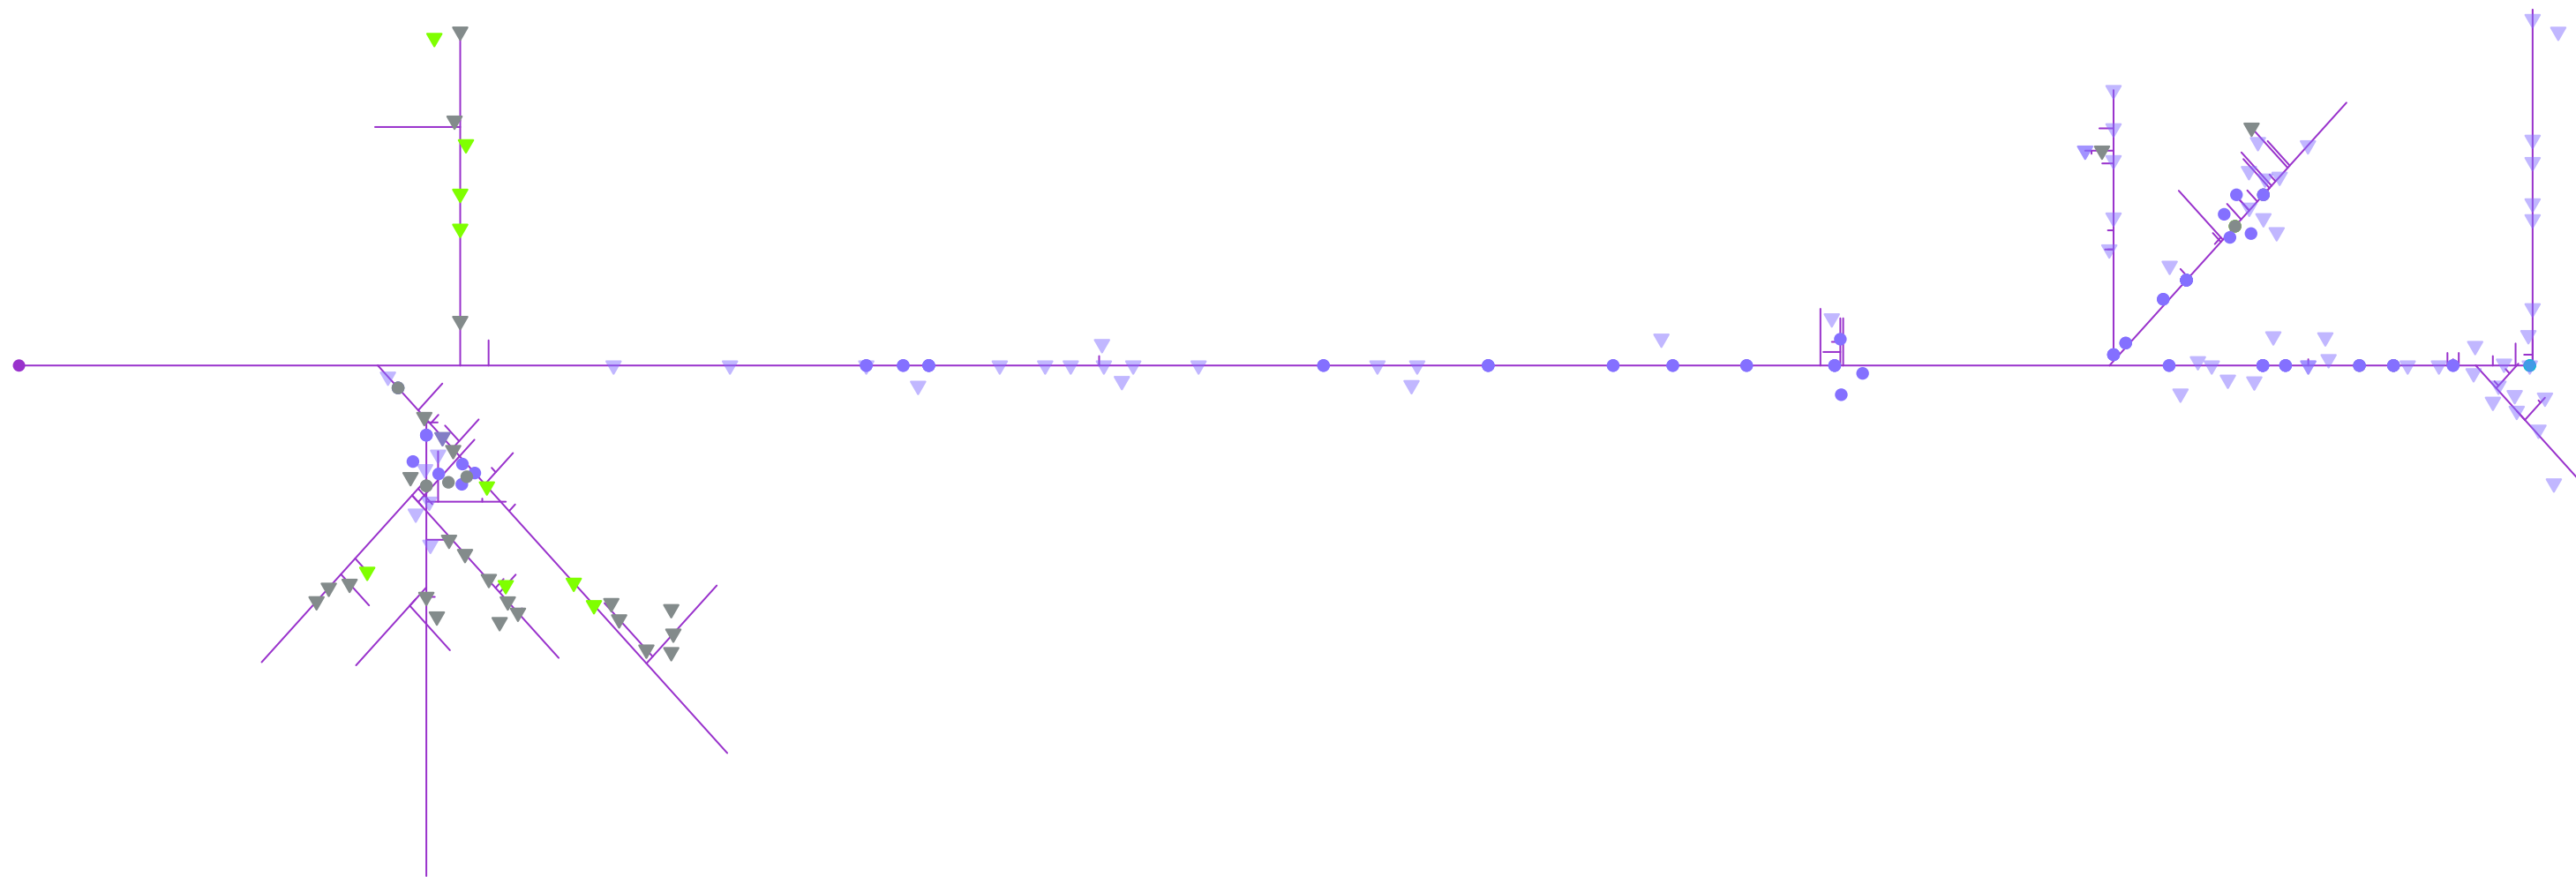

3 claw KC #8 (right)

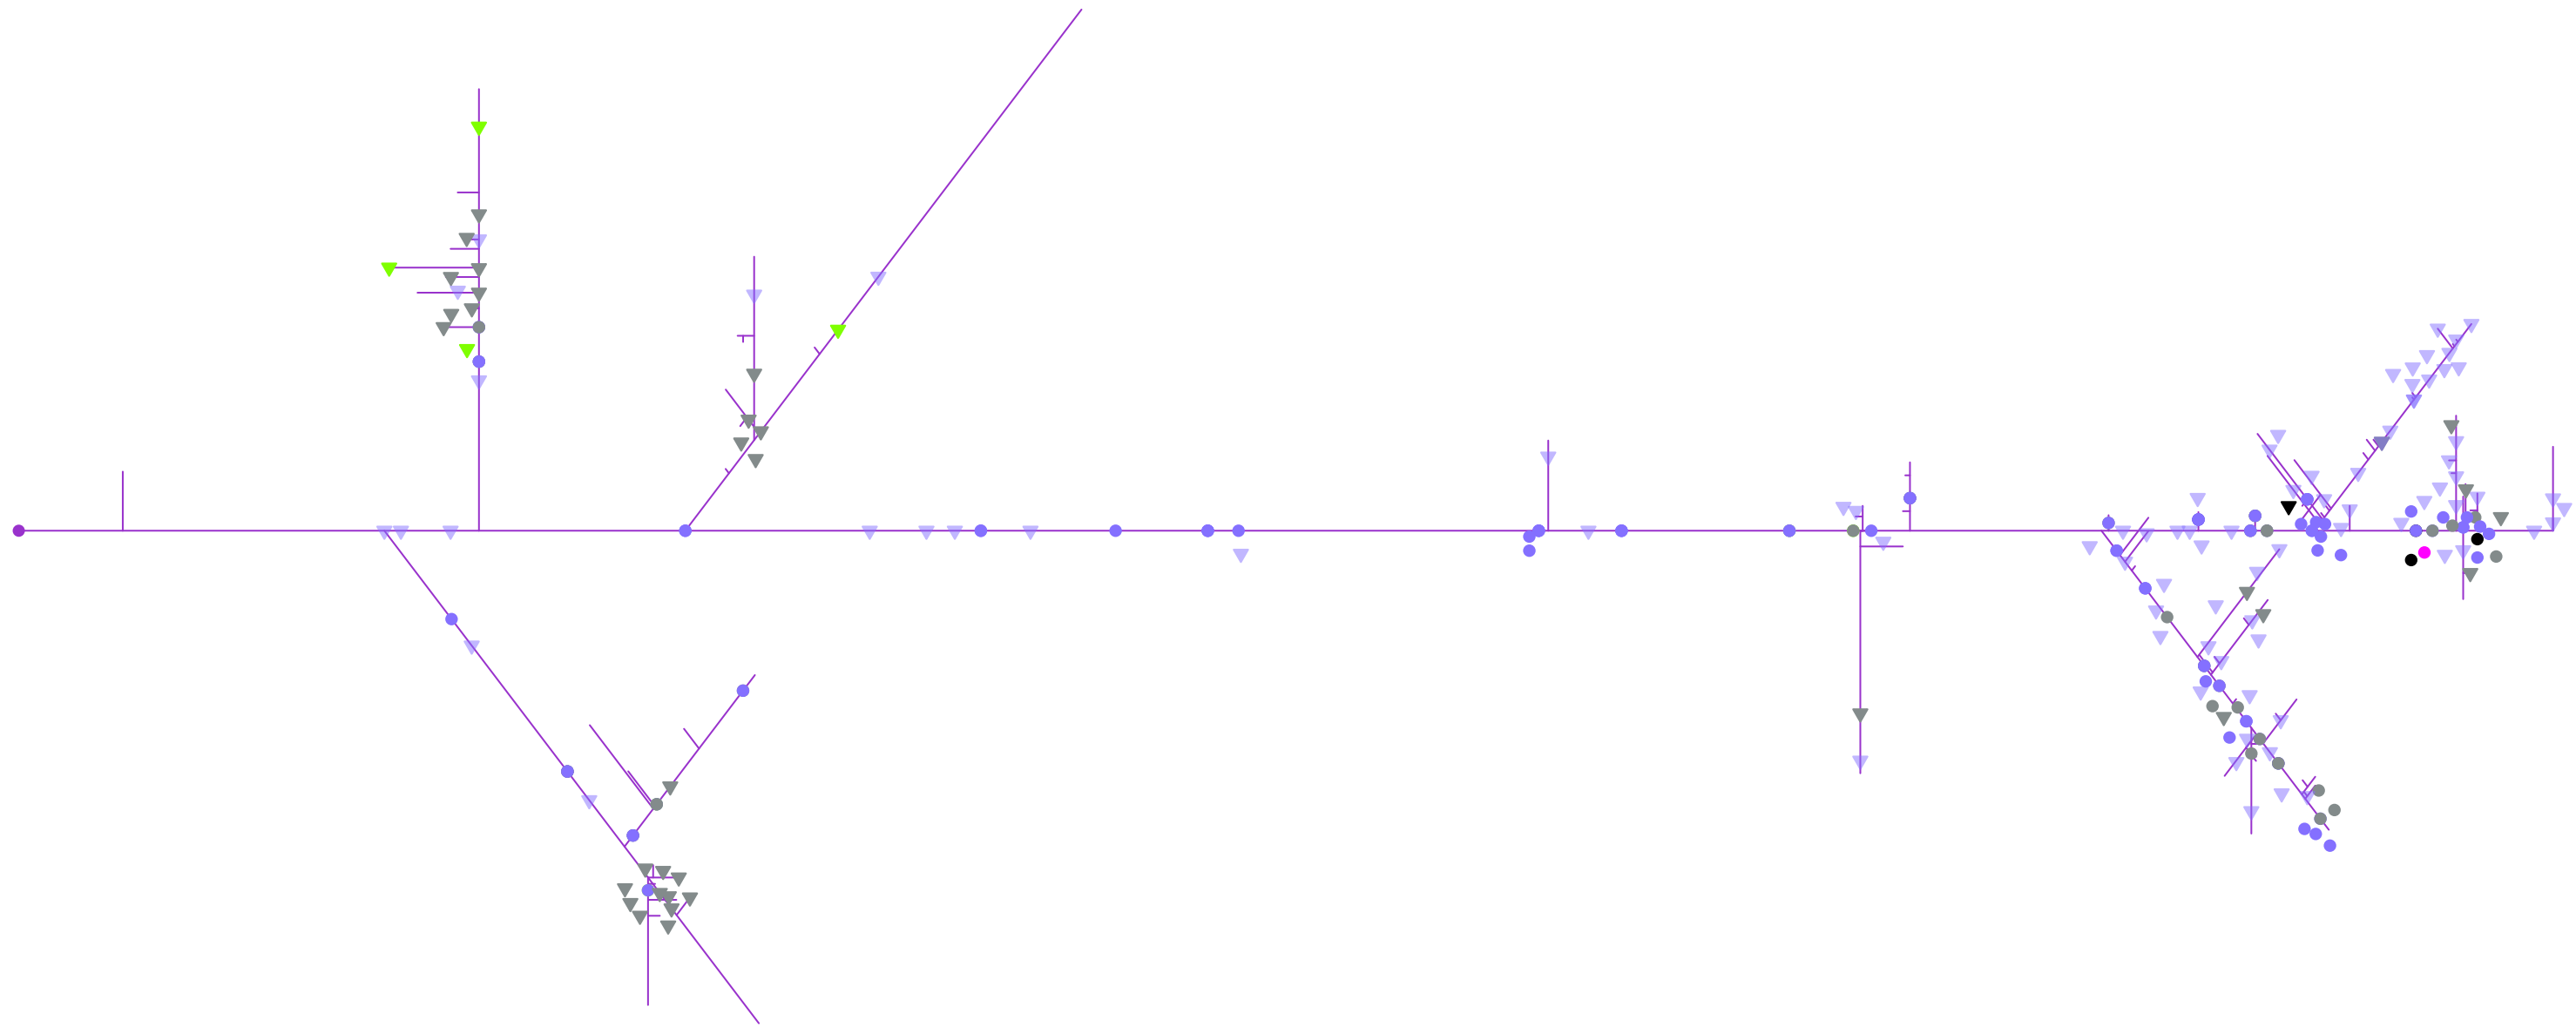

3 claw KC #9 (right)

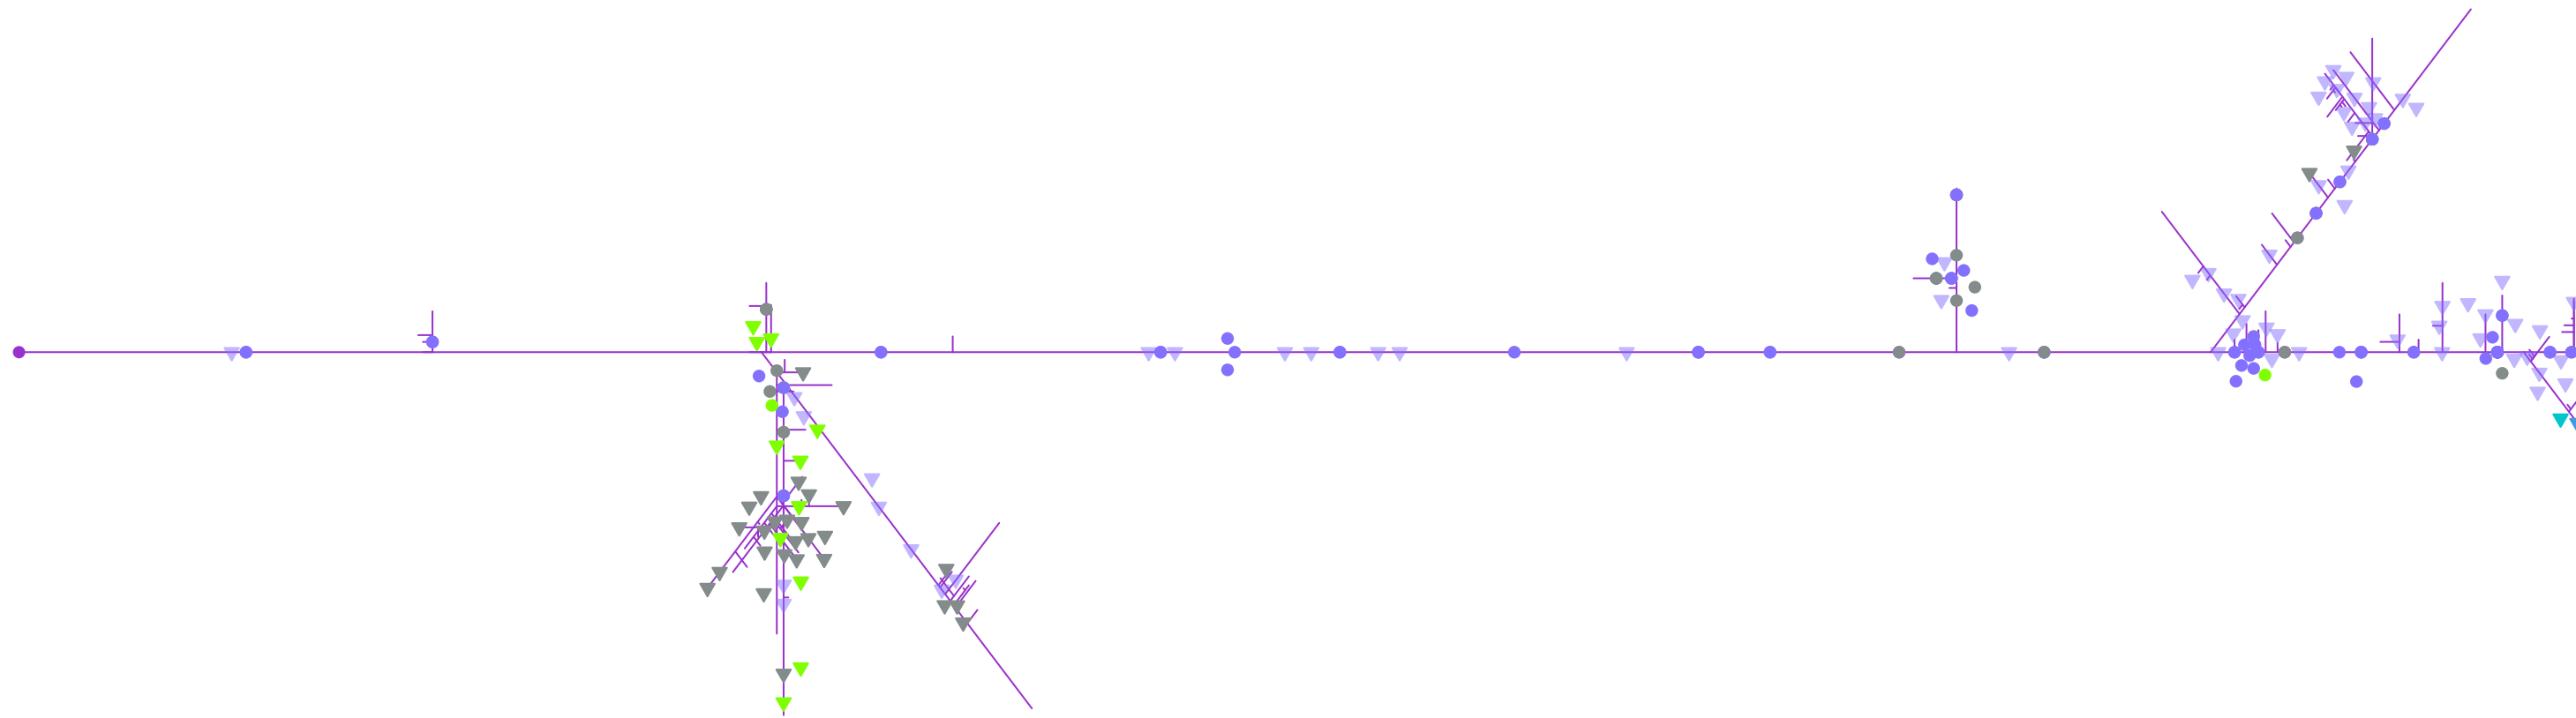

3 claw KC #10 (right)

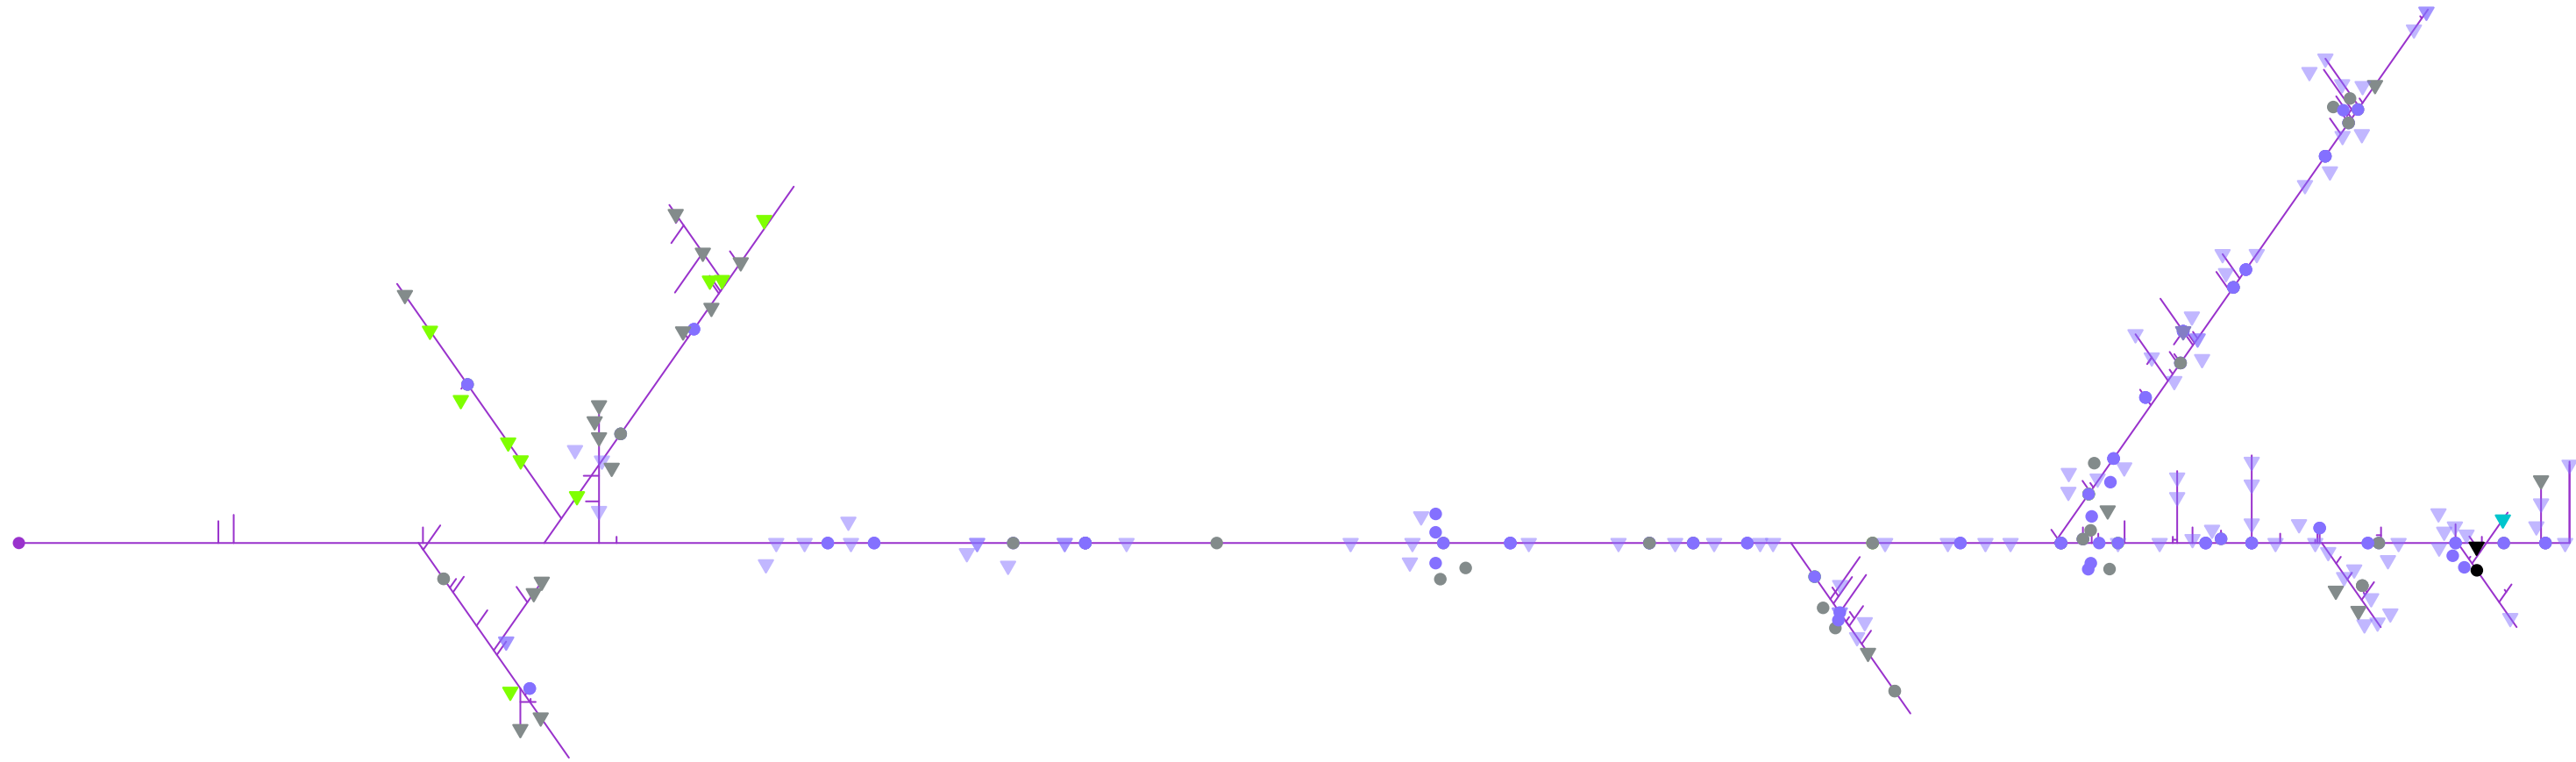



3 claw KC #11 (right)

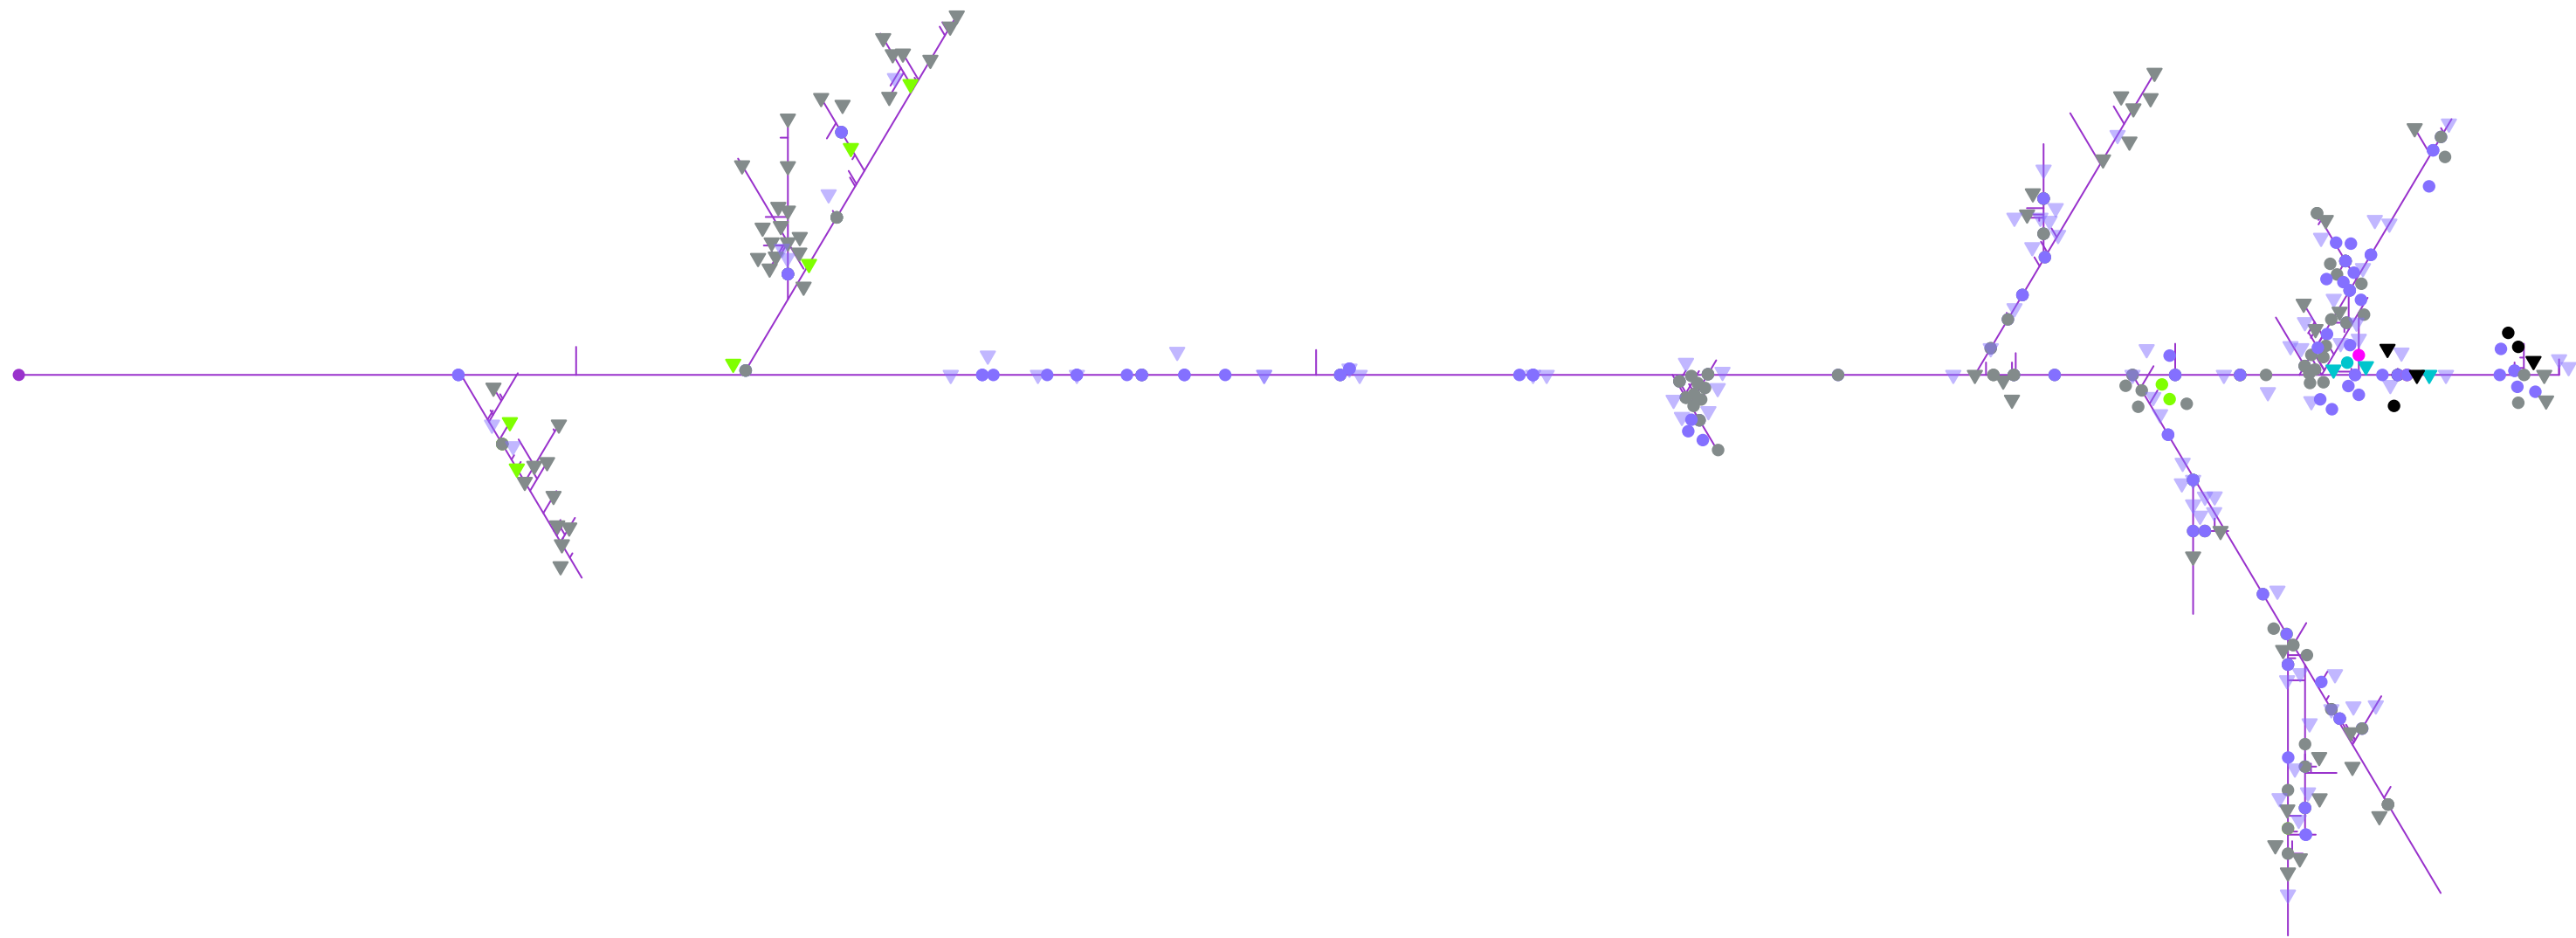

3 claw KC #12 (right)

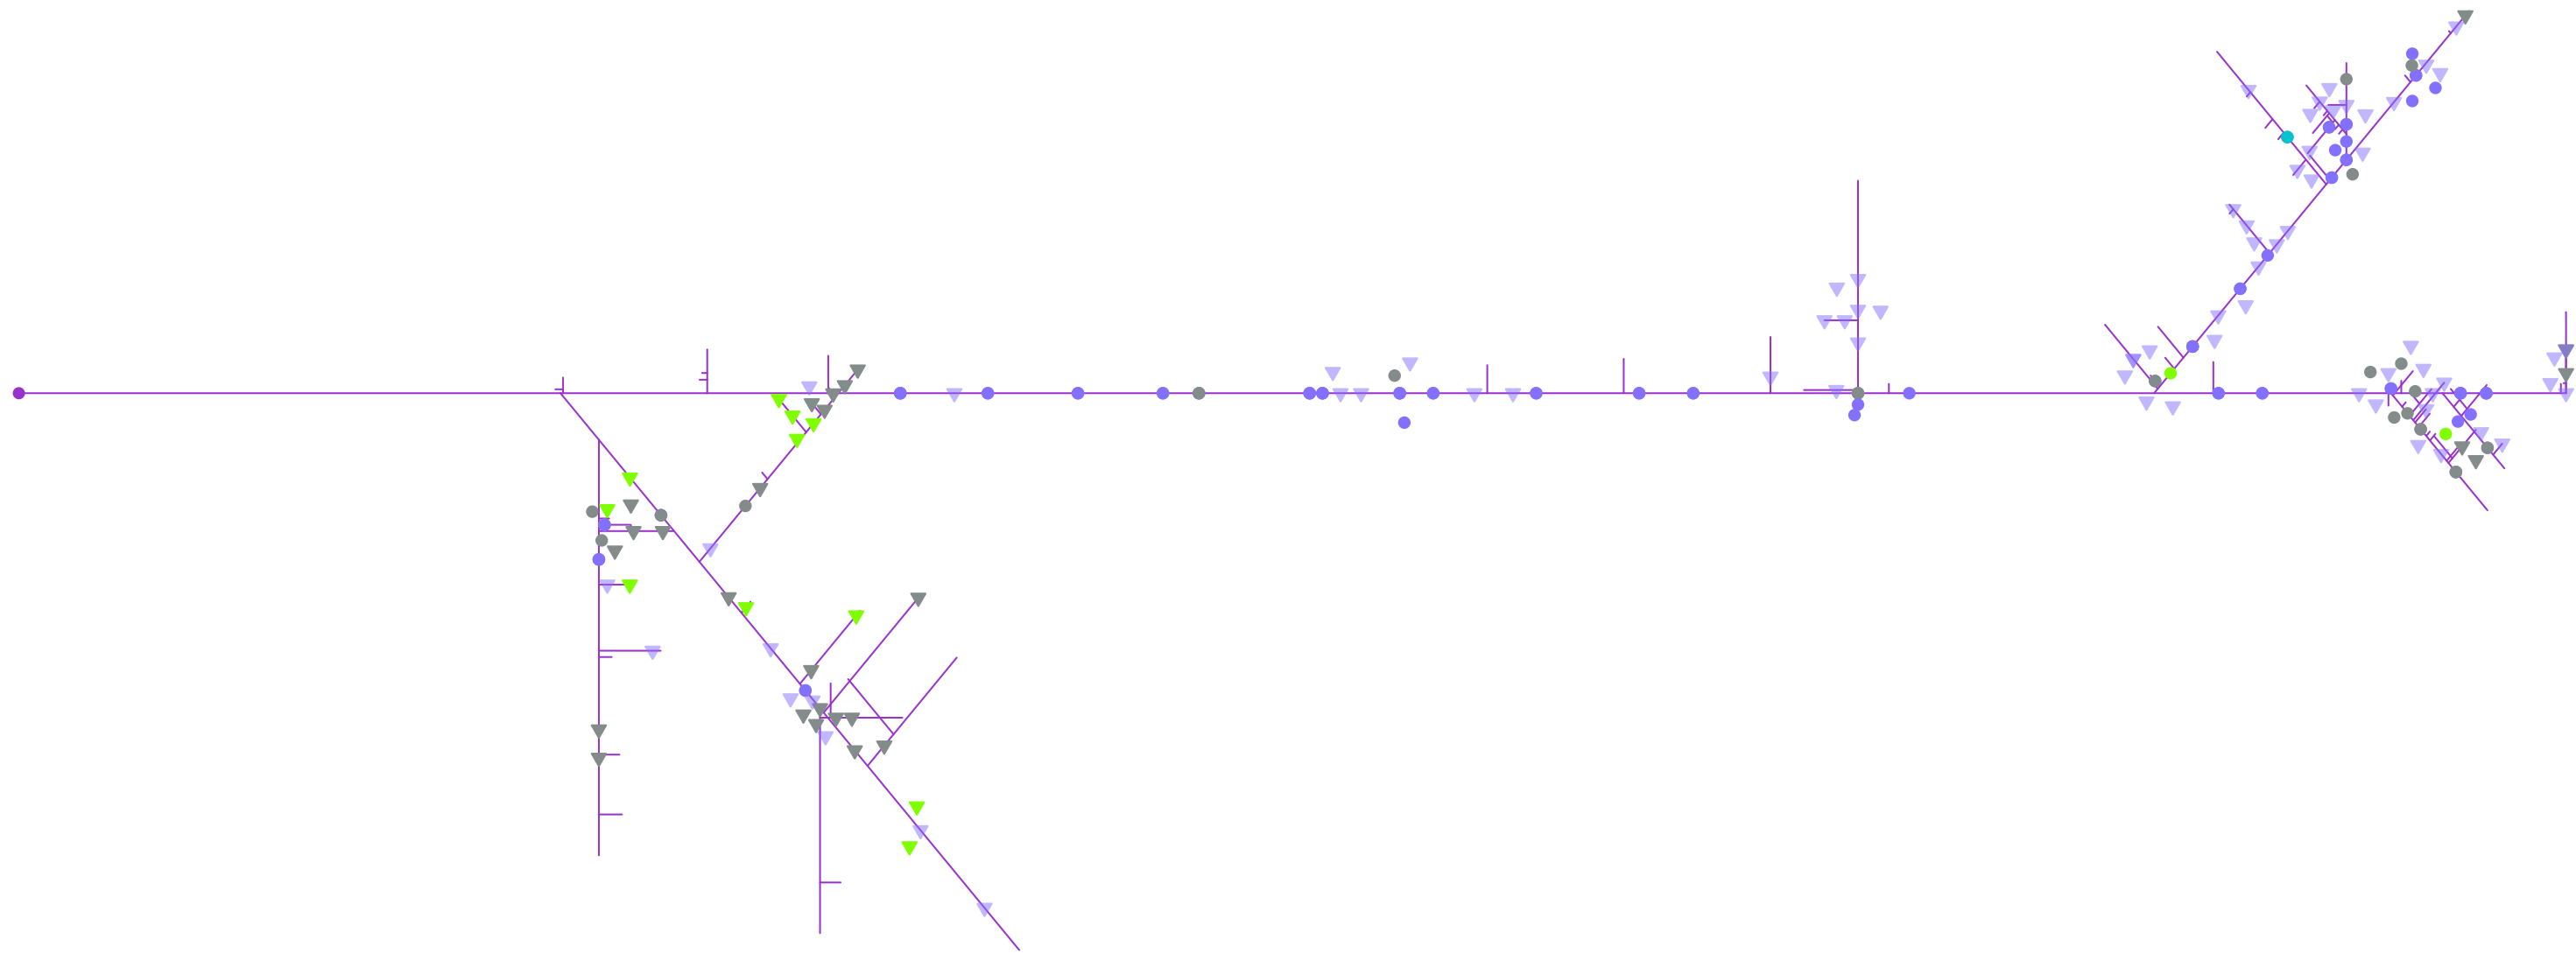

3 claw KC #13 (right)

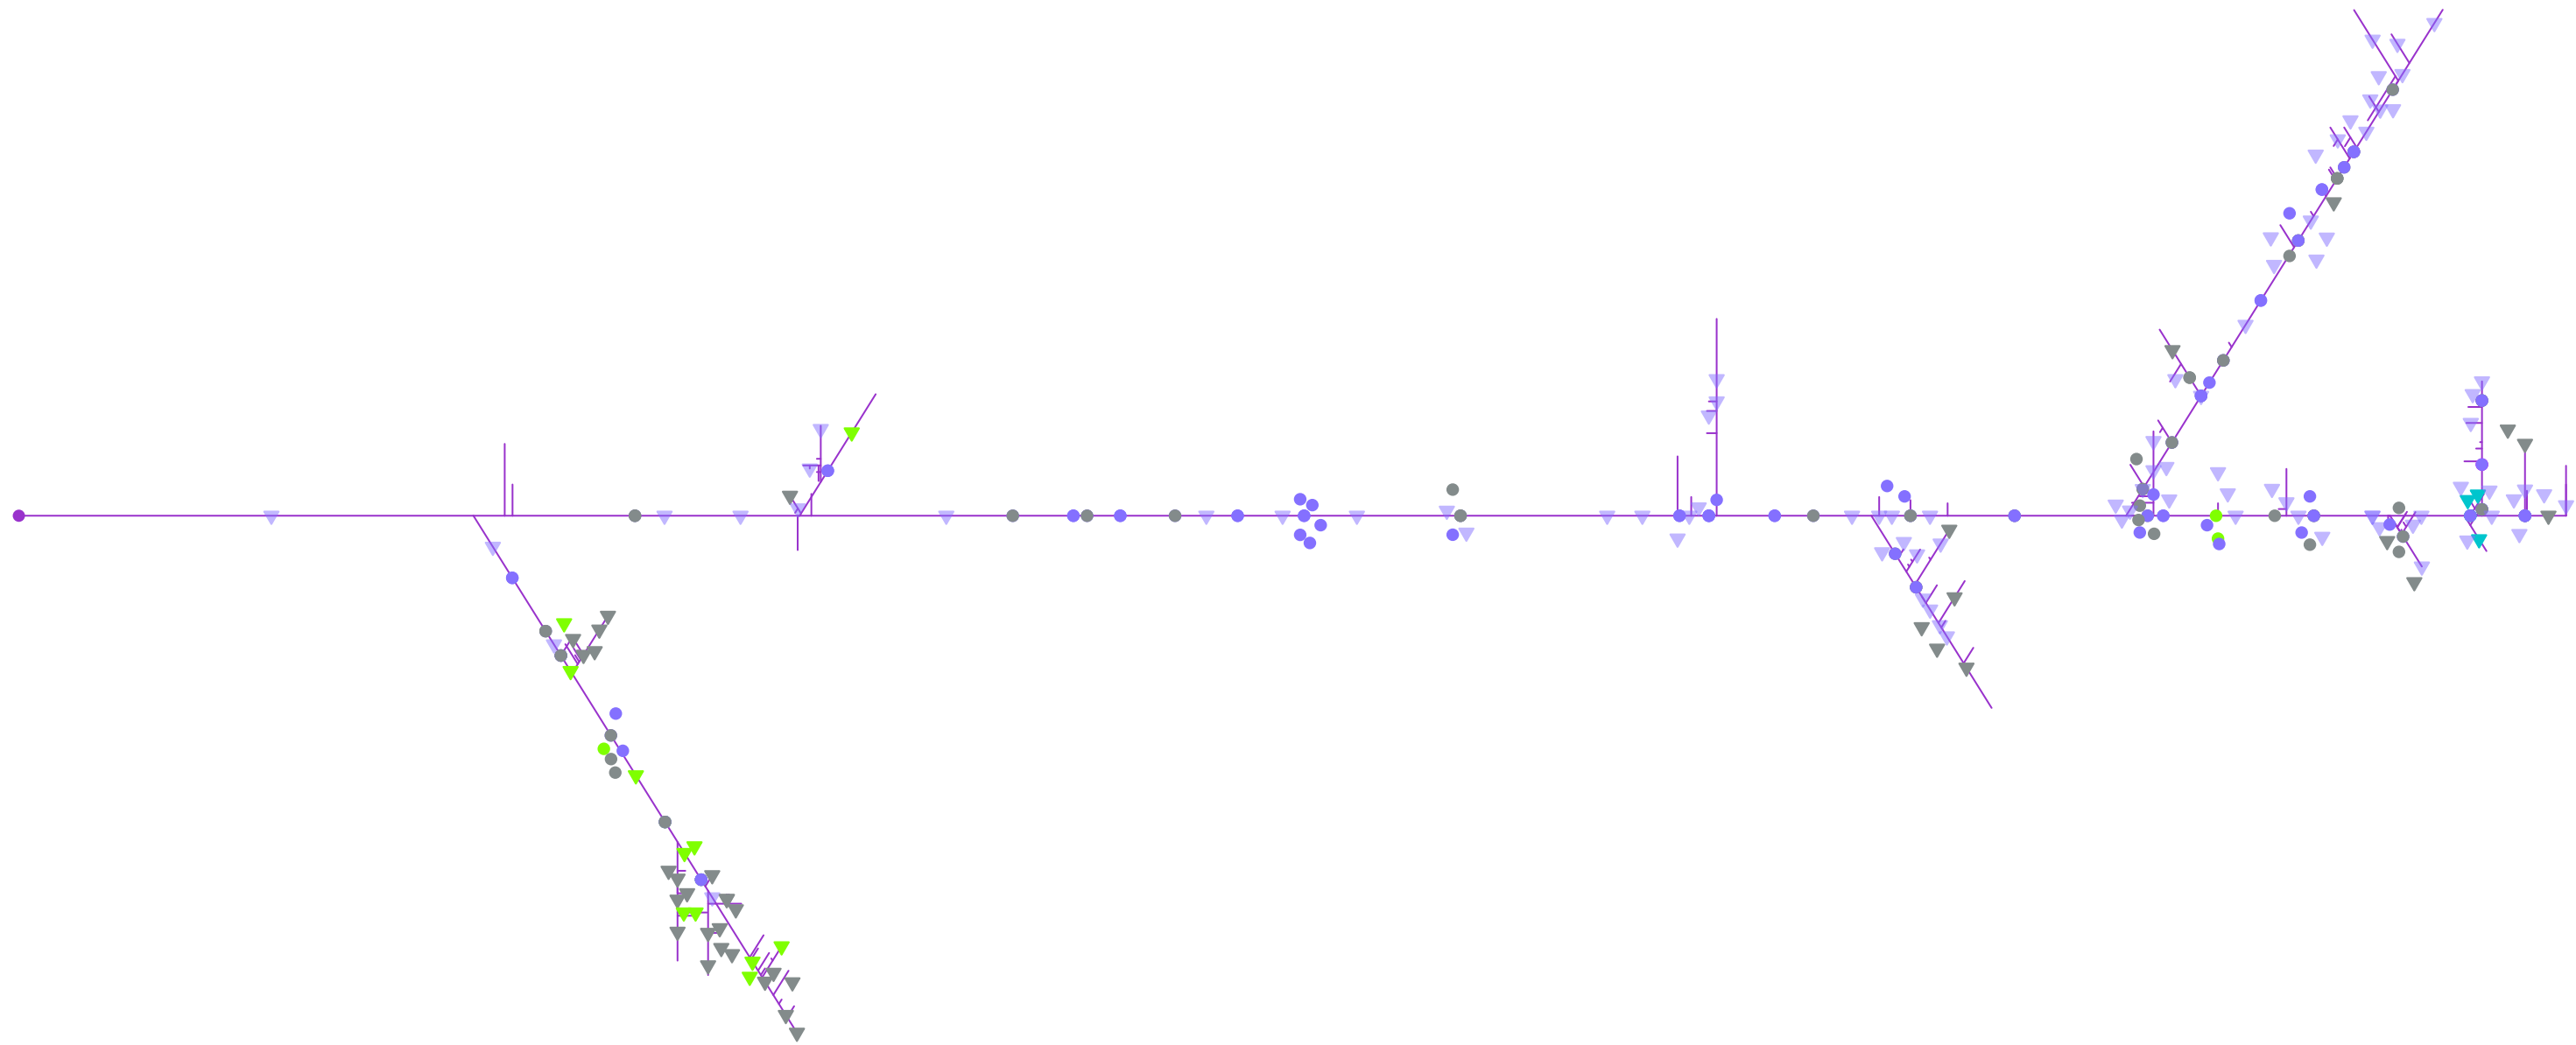

3 claw KC #14 (right)

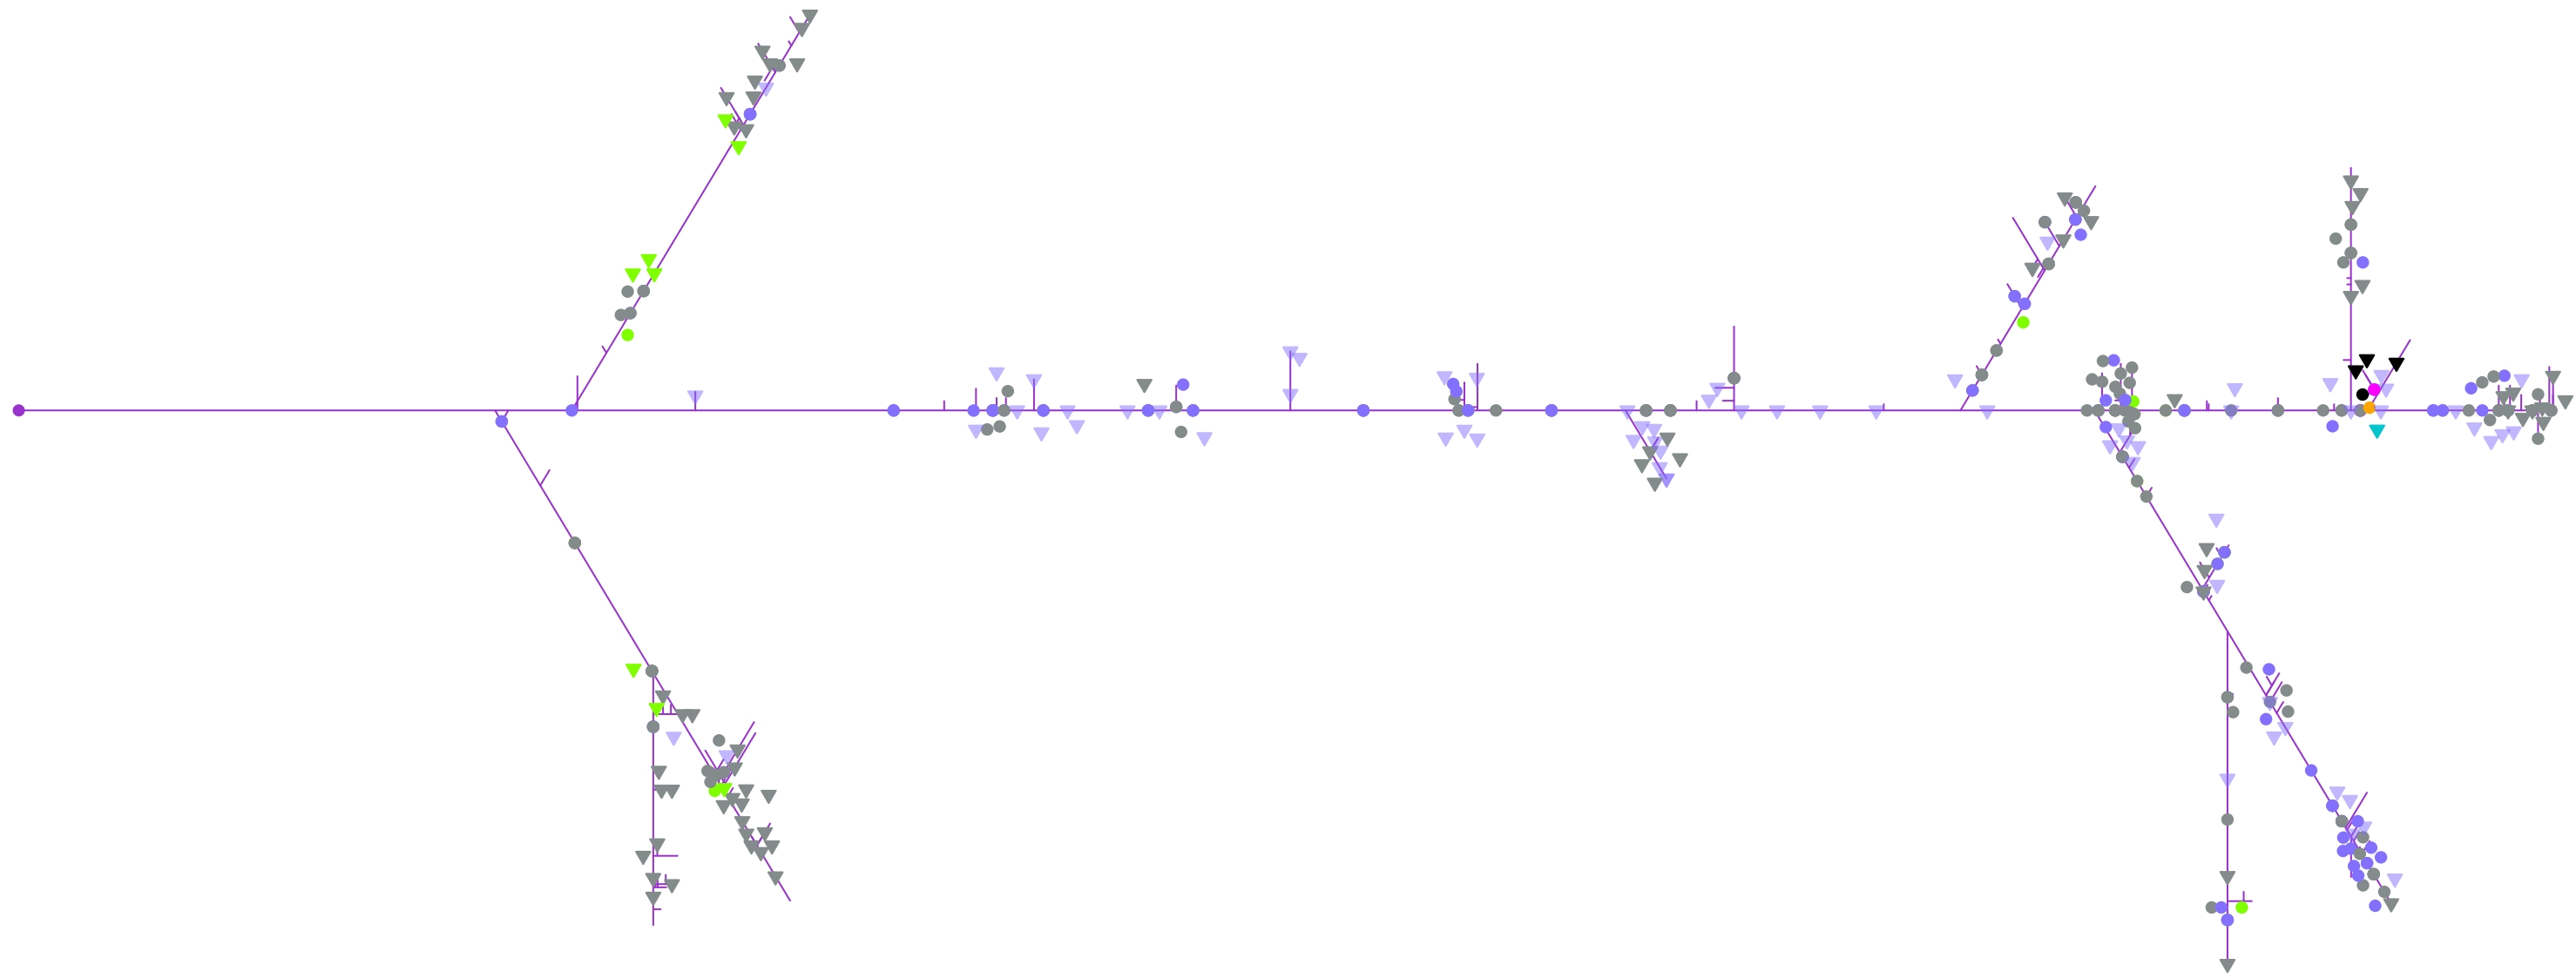

3 claw KC #15 (right)

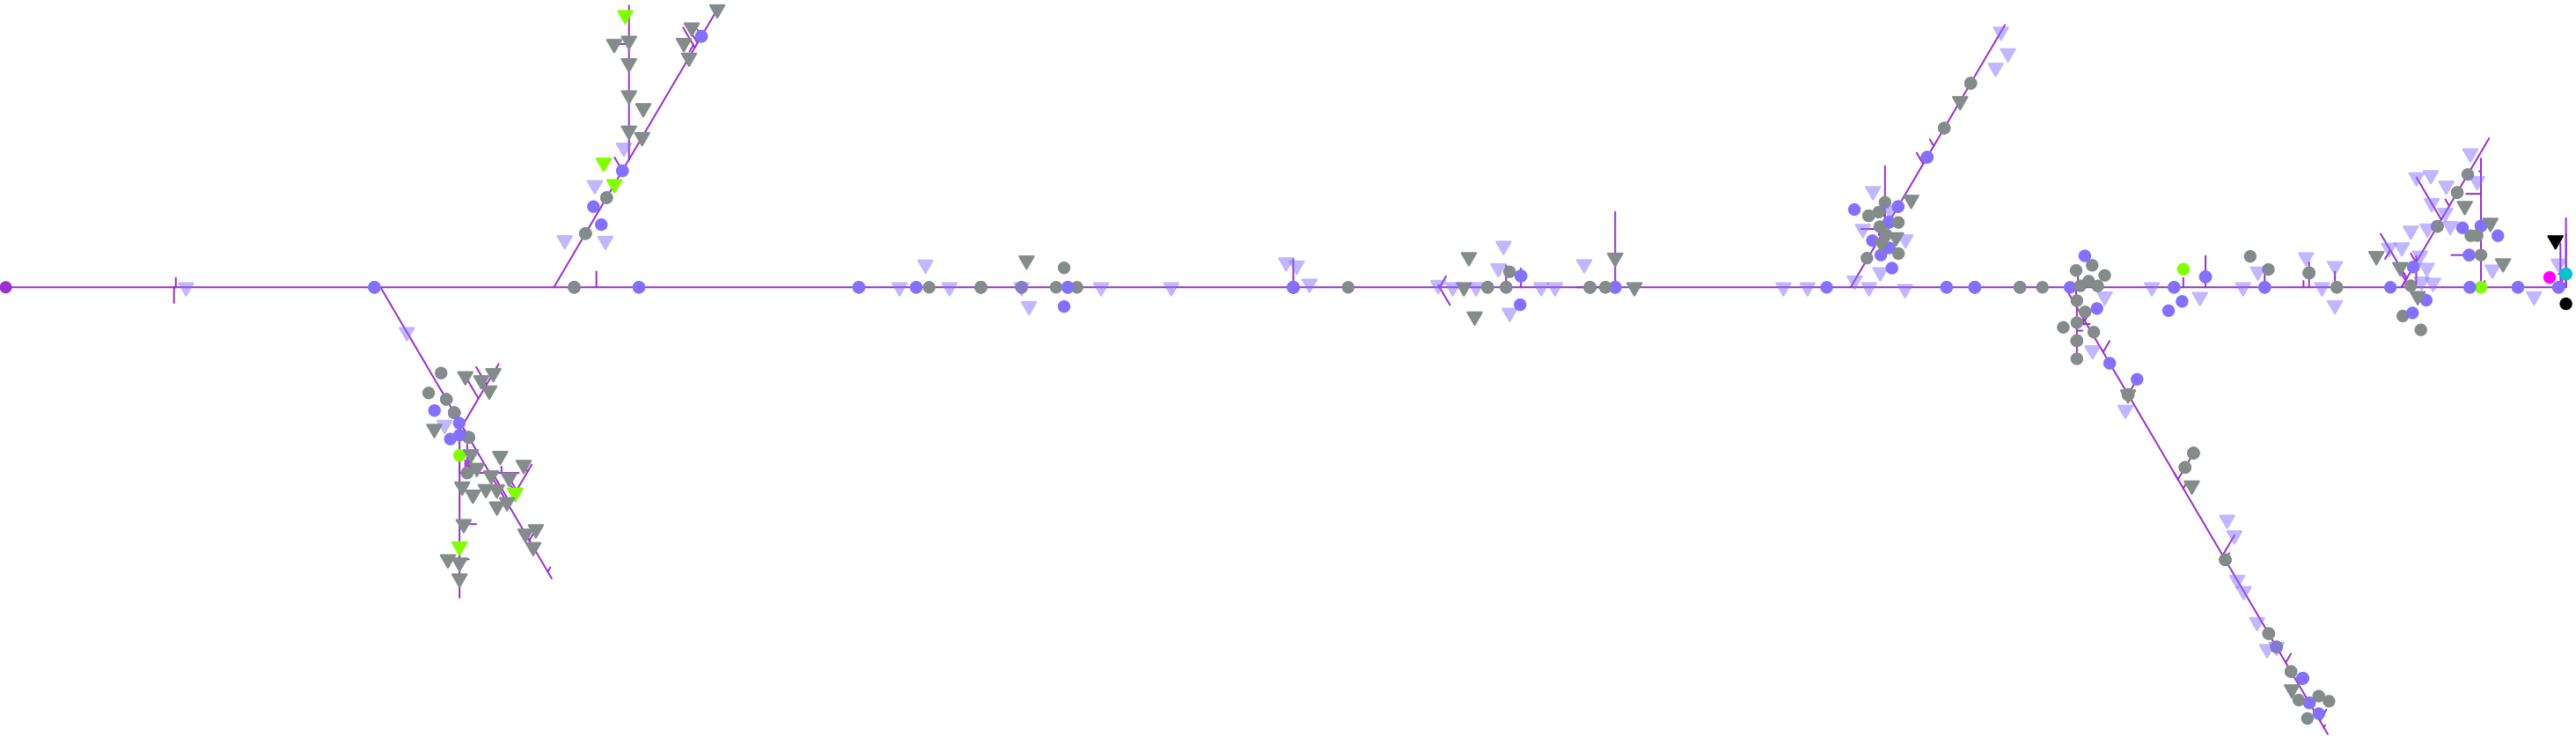

3 claw KC #16 (right)

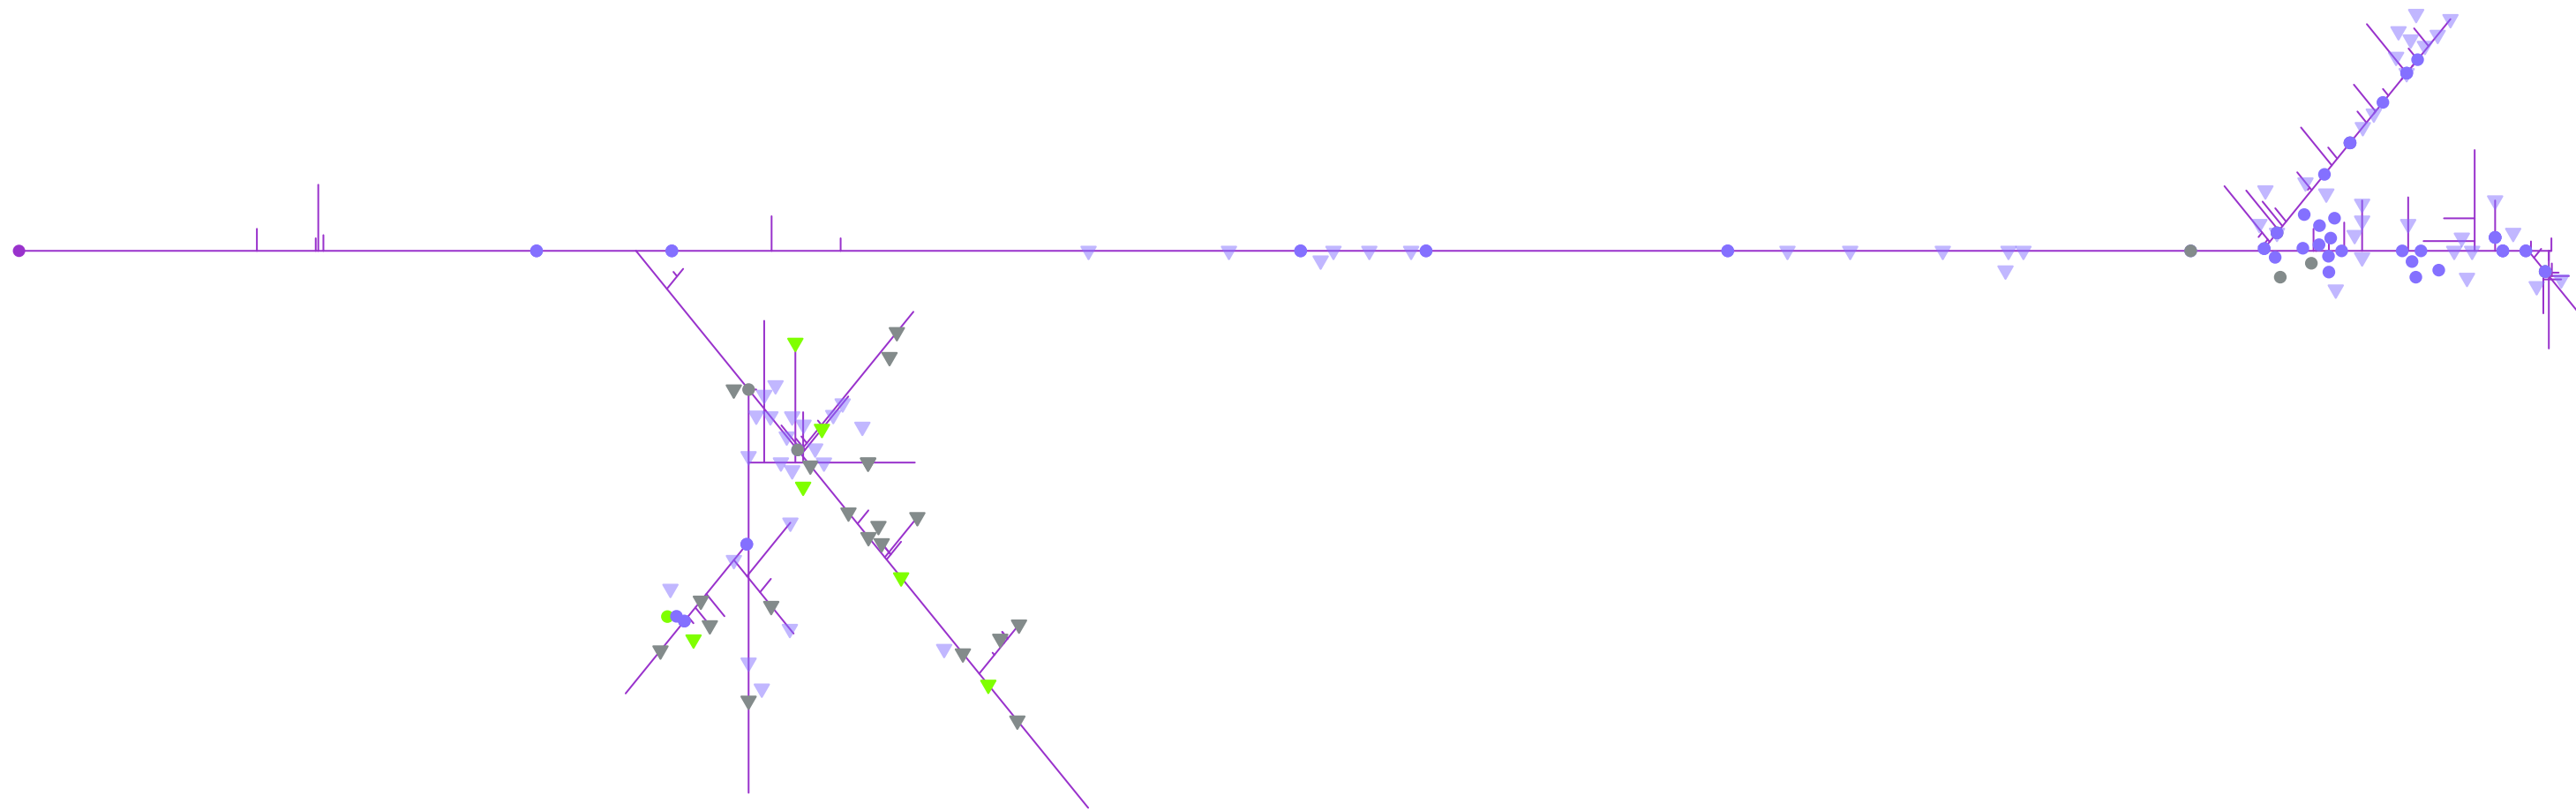

3 claw KC #17 (right)

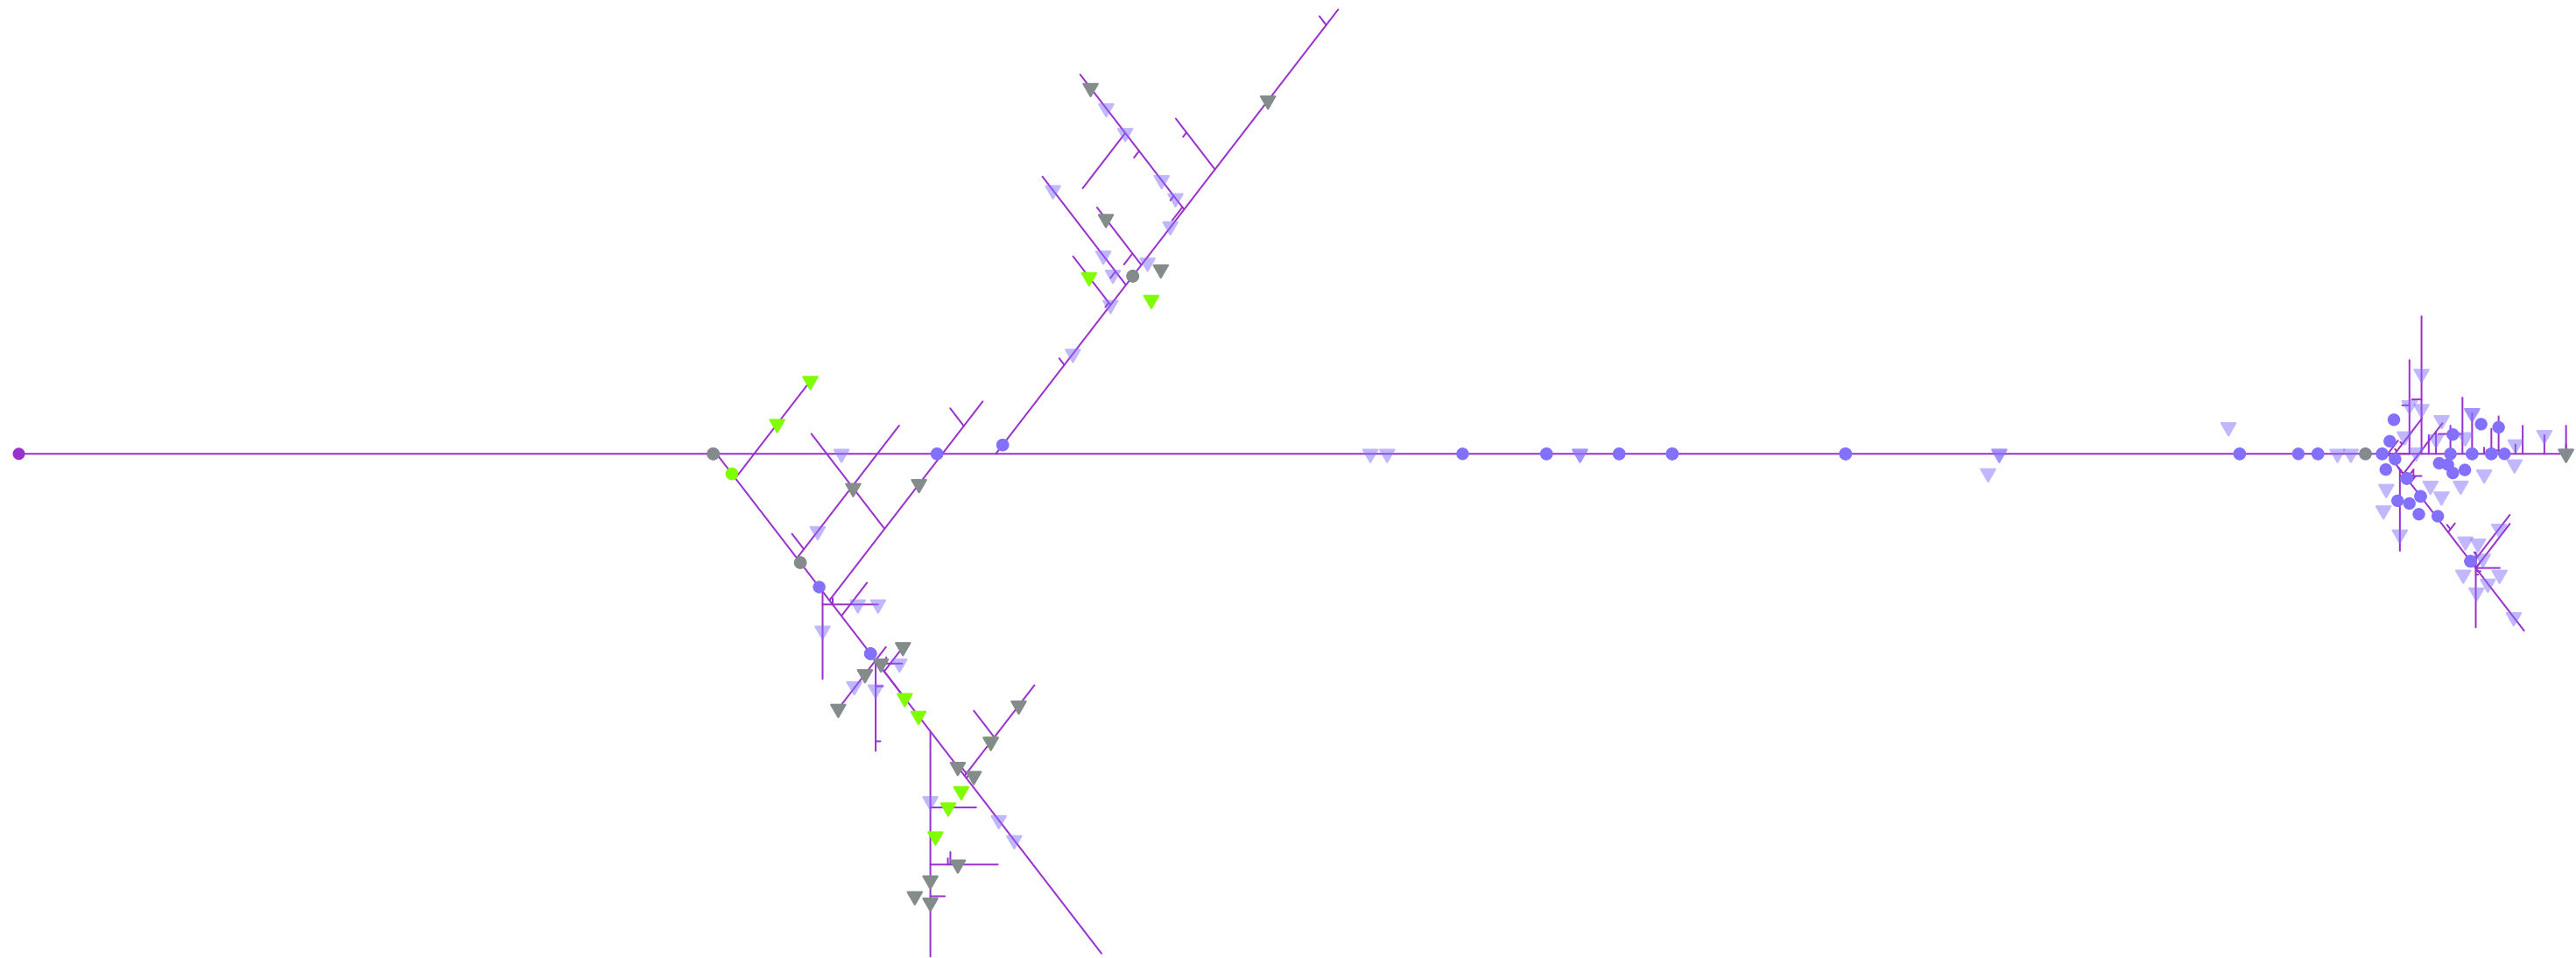

4 claw KC #1 (right)

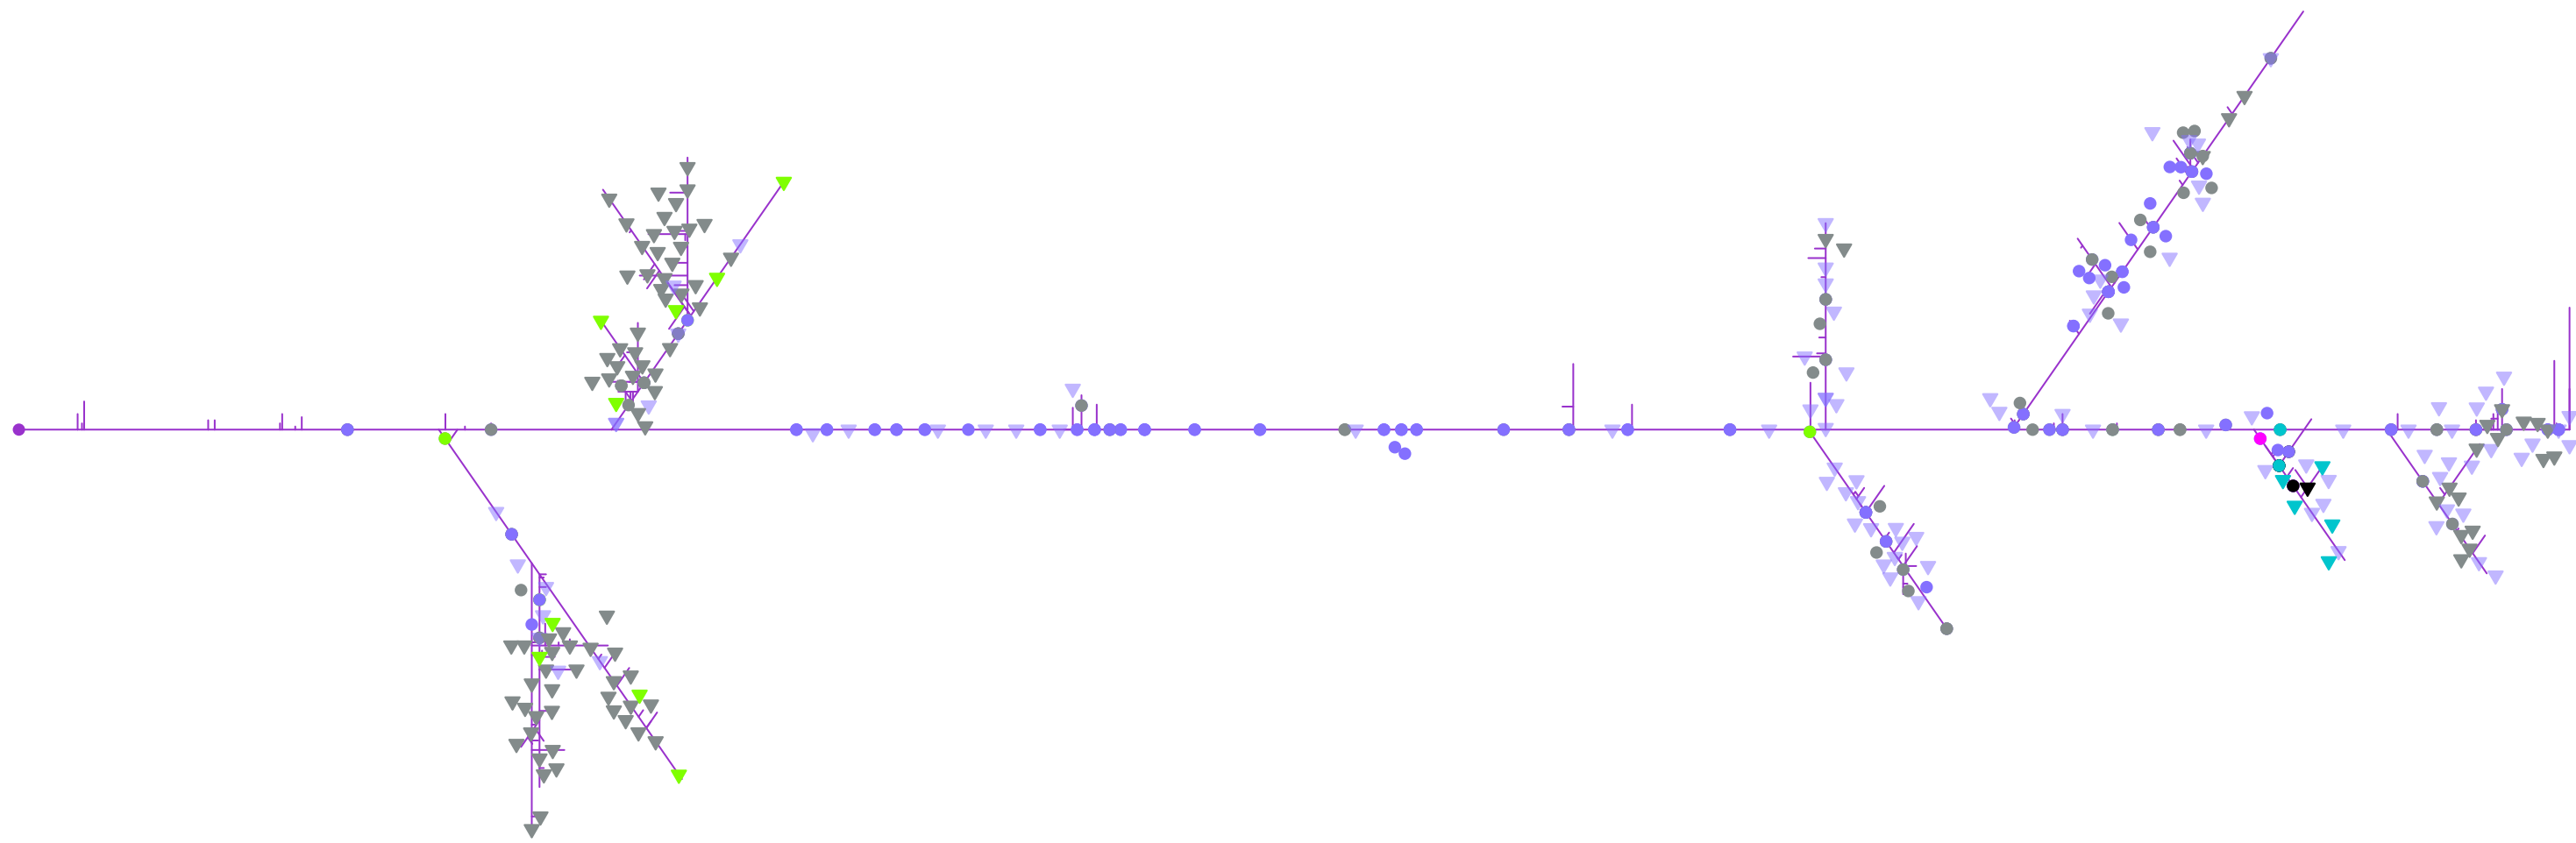



4 claw KC #2 (right)

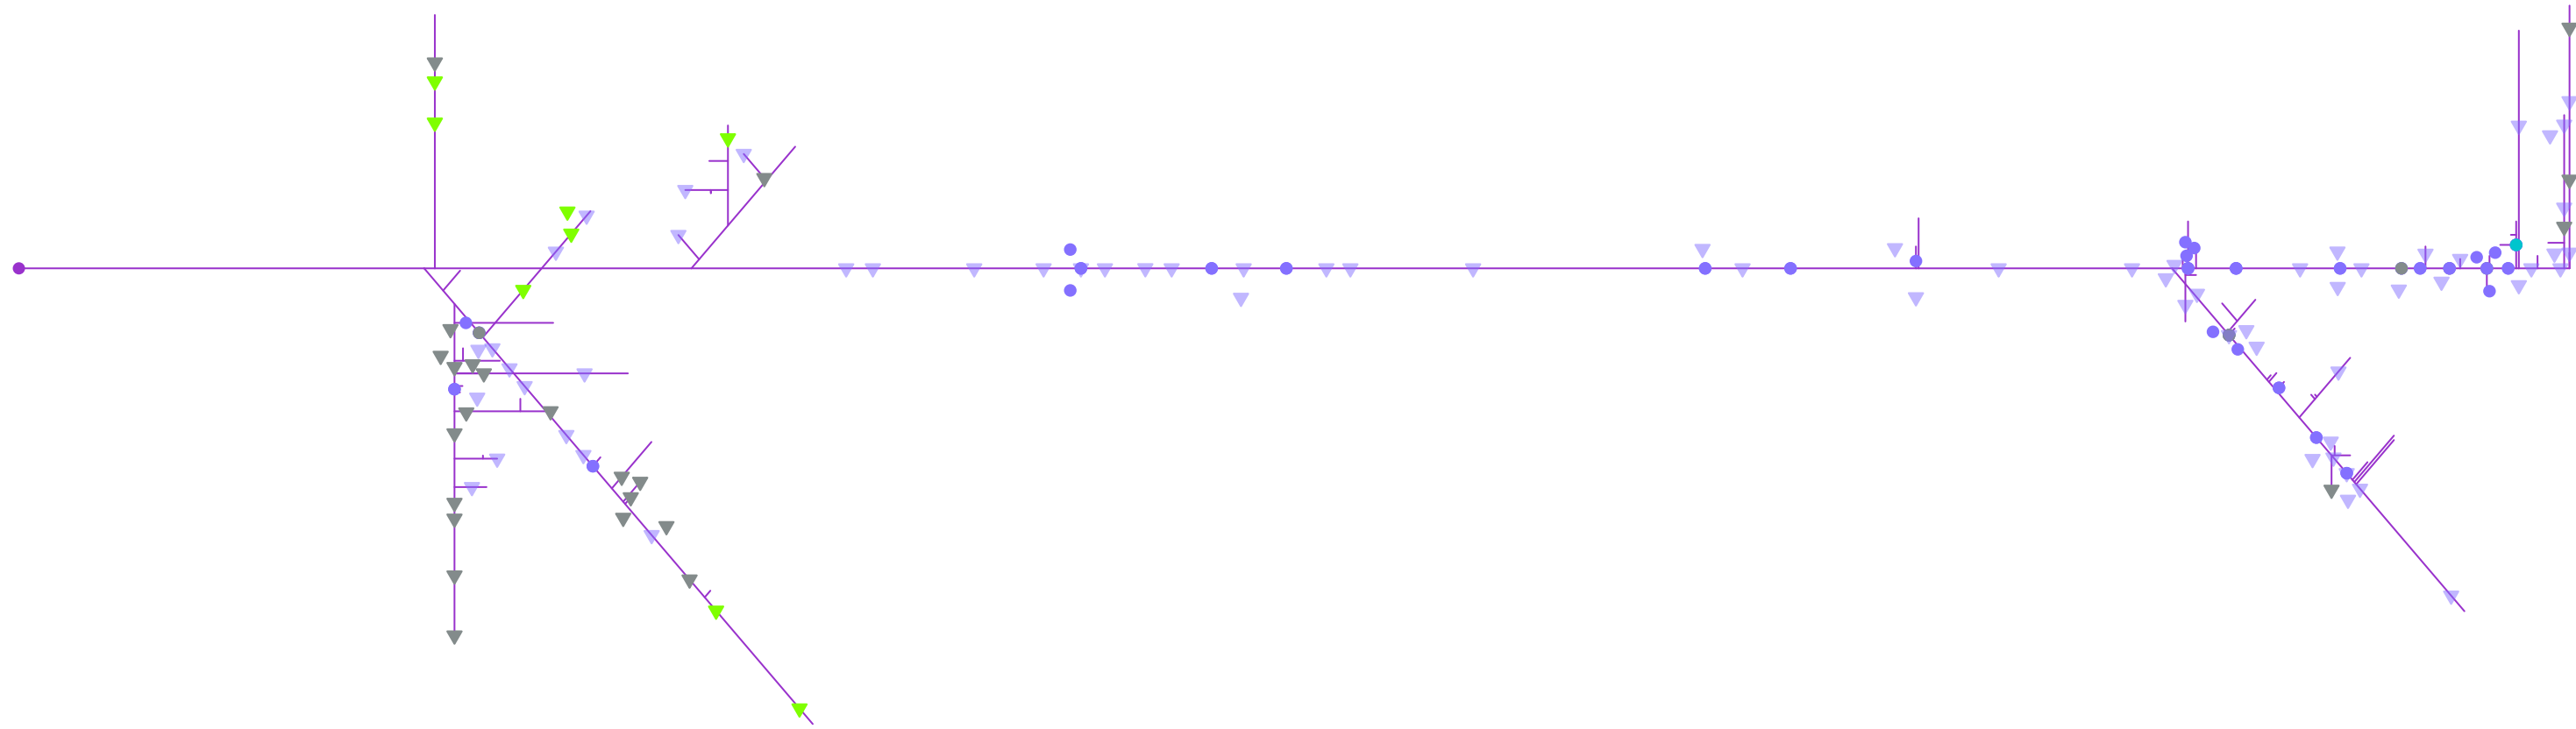

4 claw KC #3 (right)

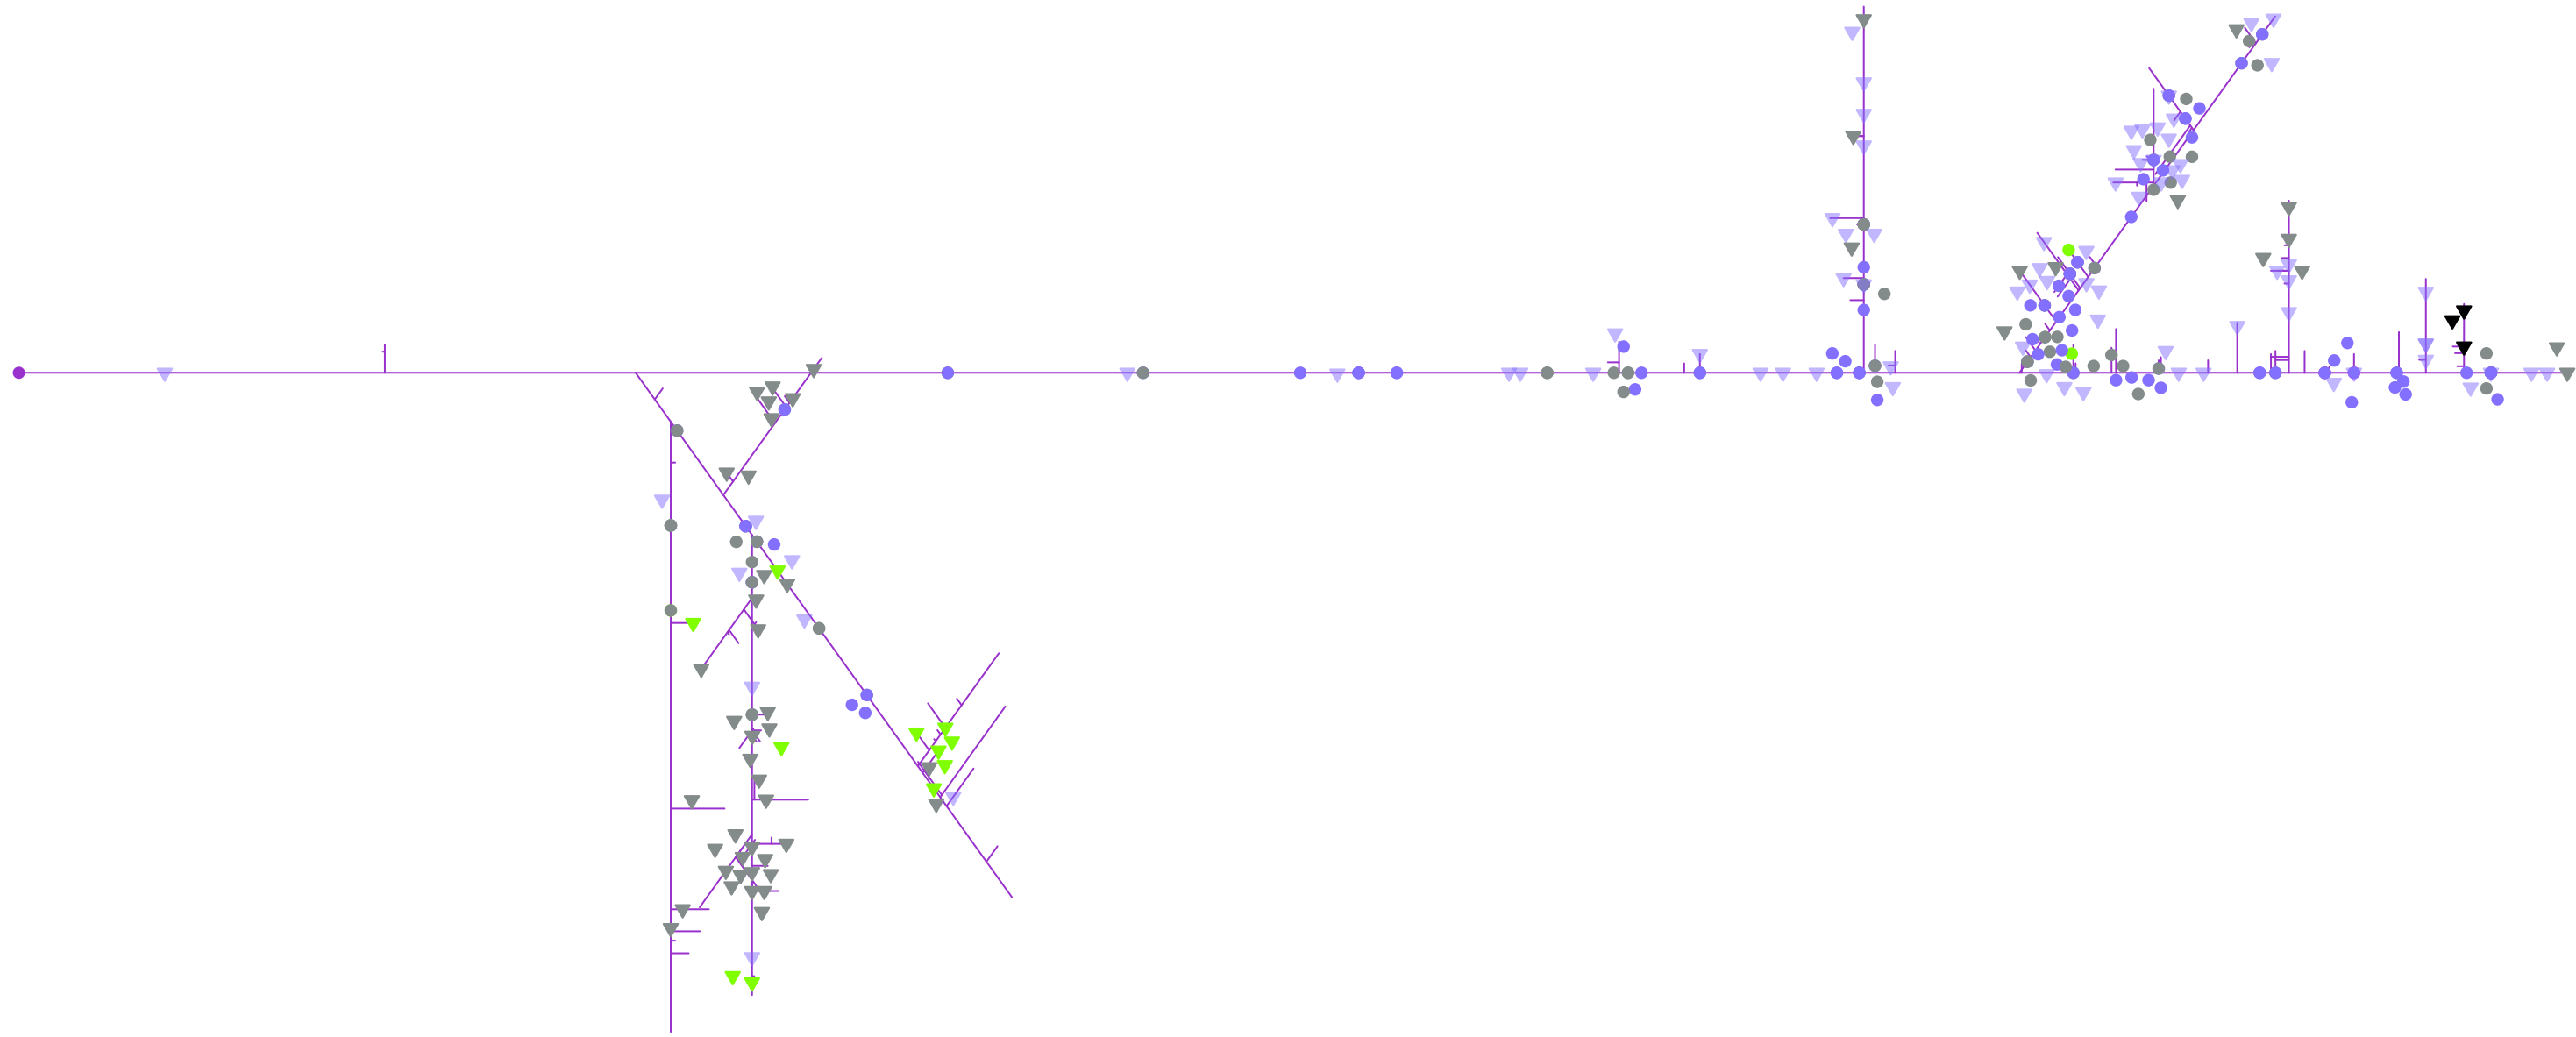

4 claw KC #4 (right)

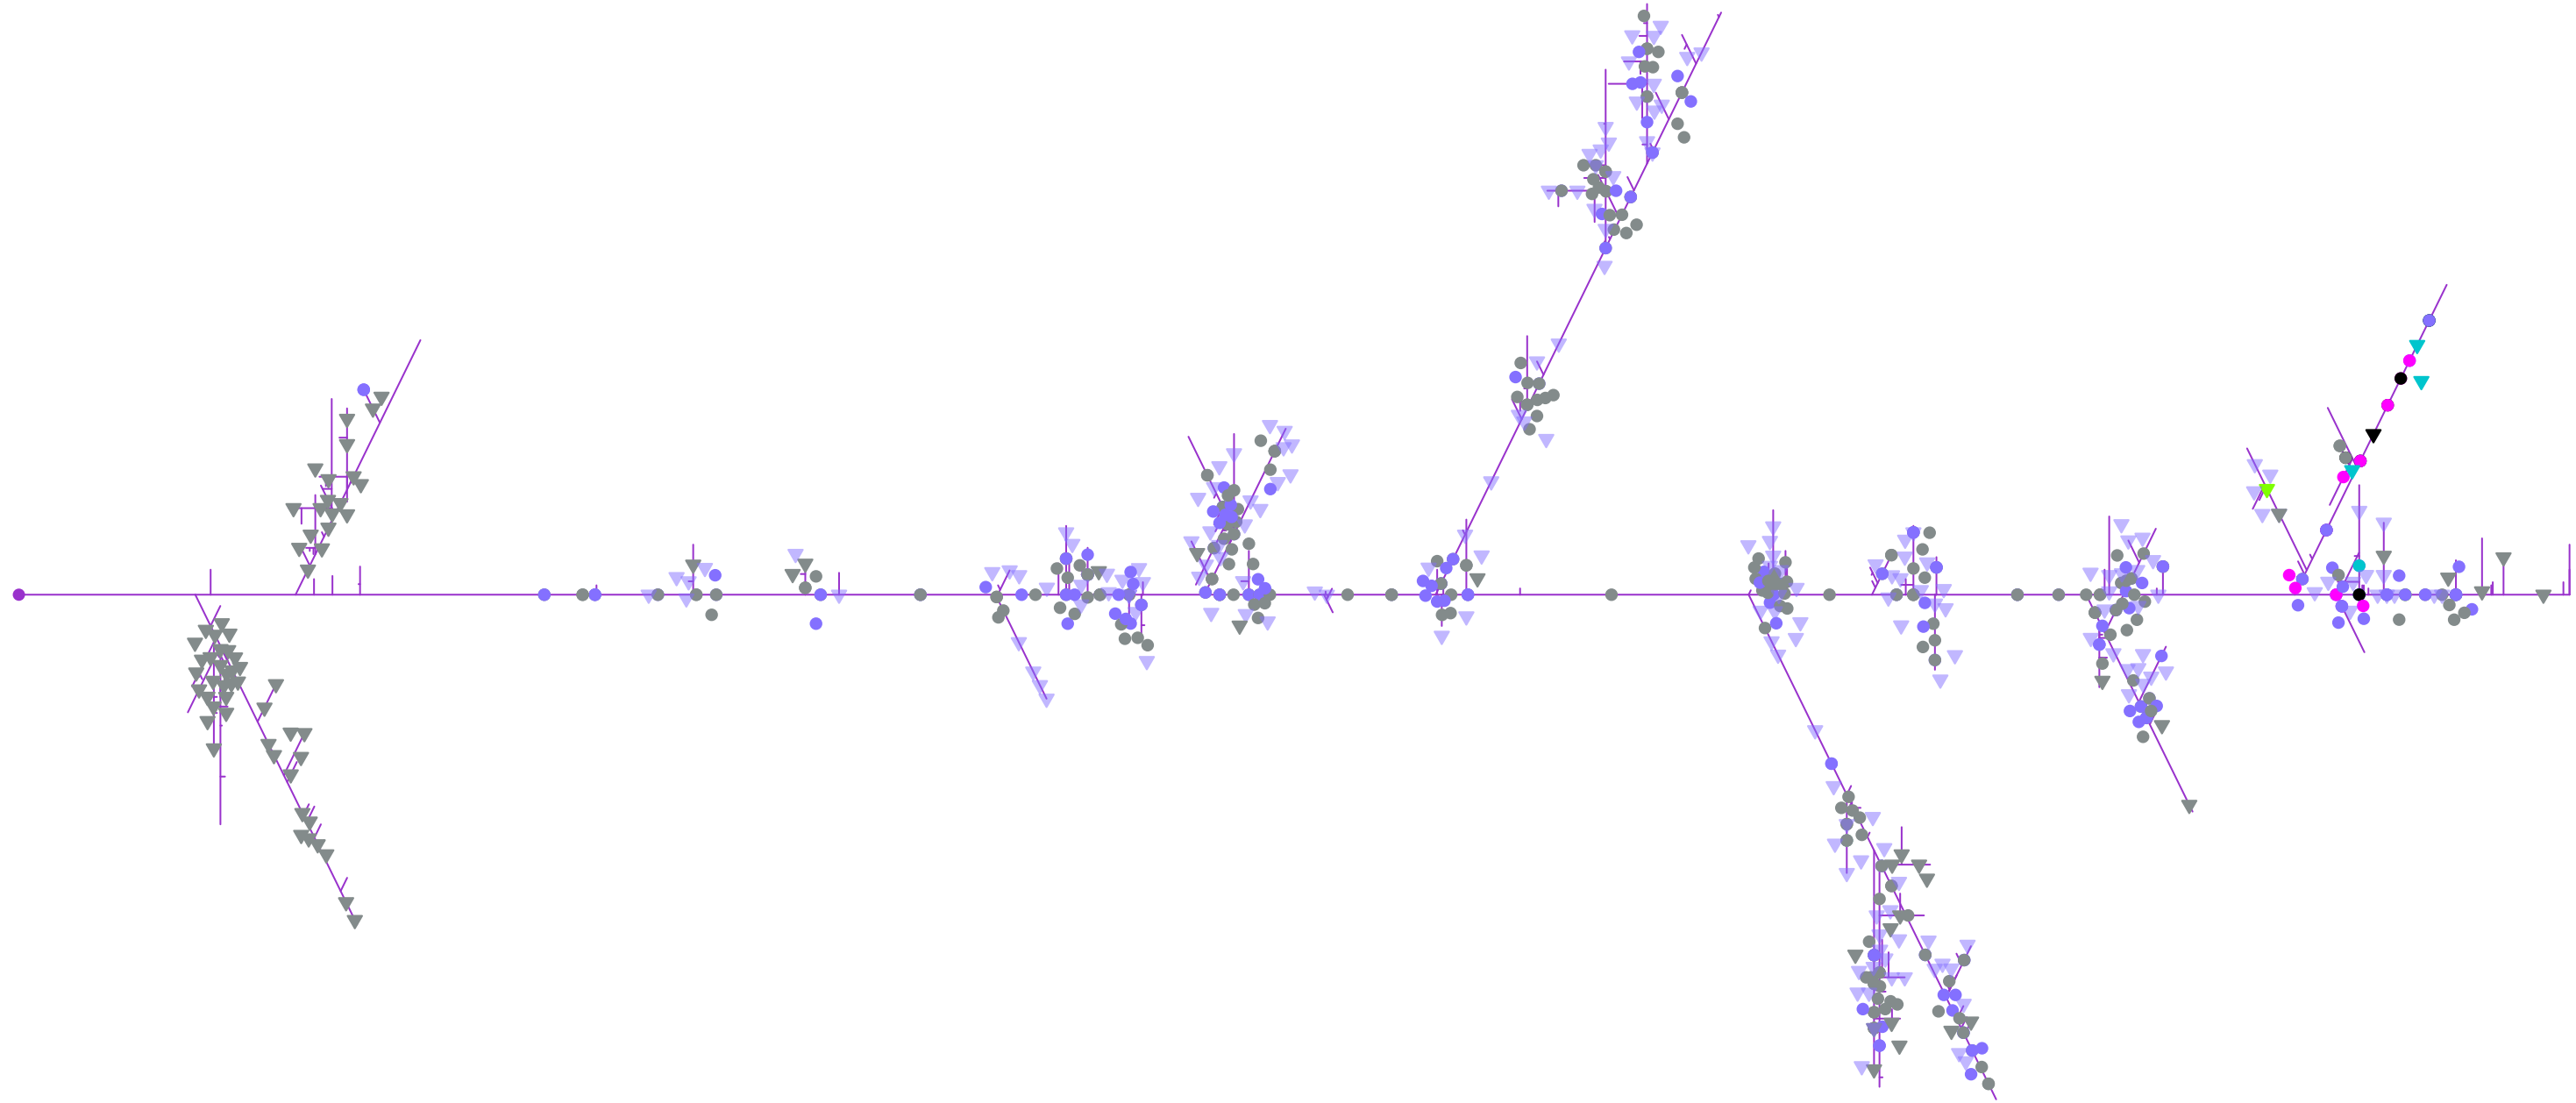

4 claw KC #5 (right)

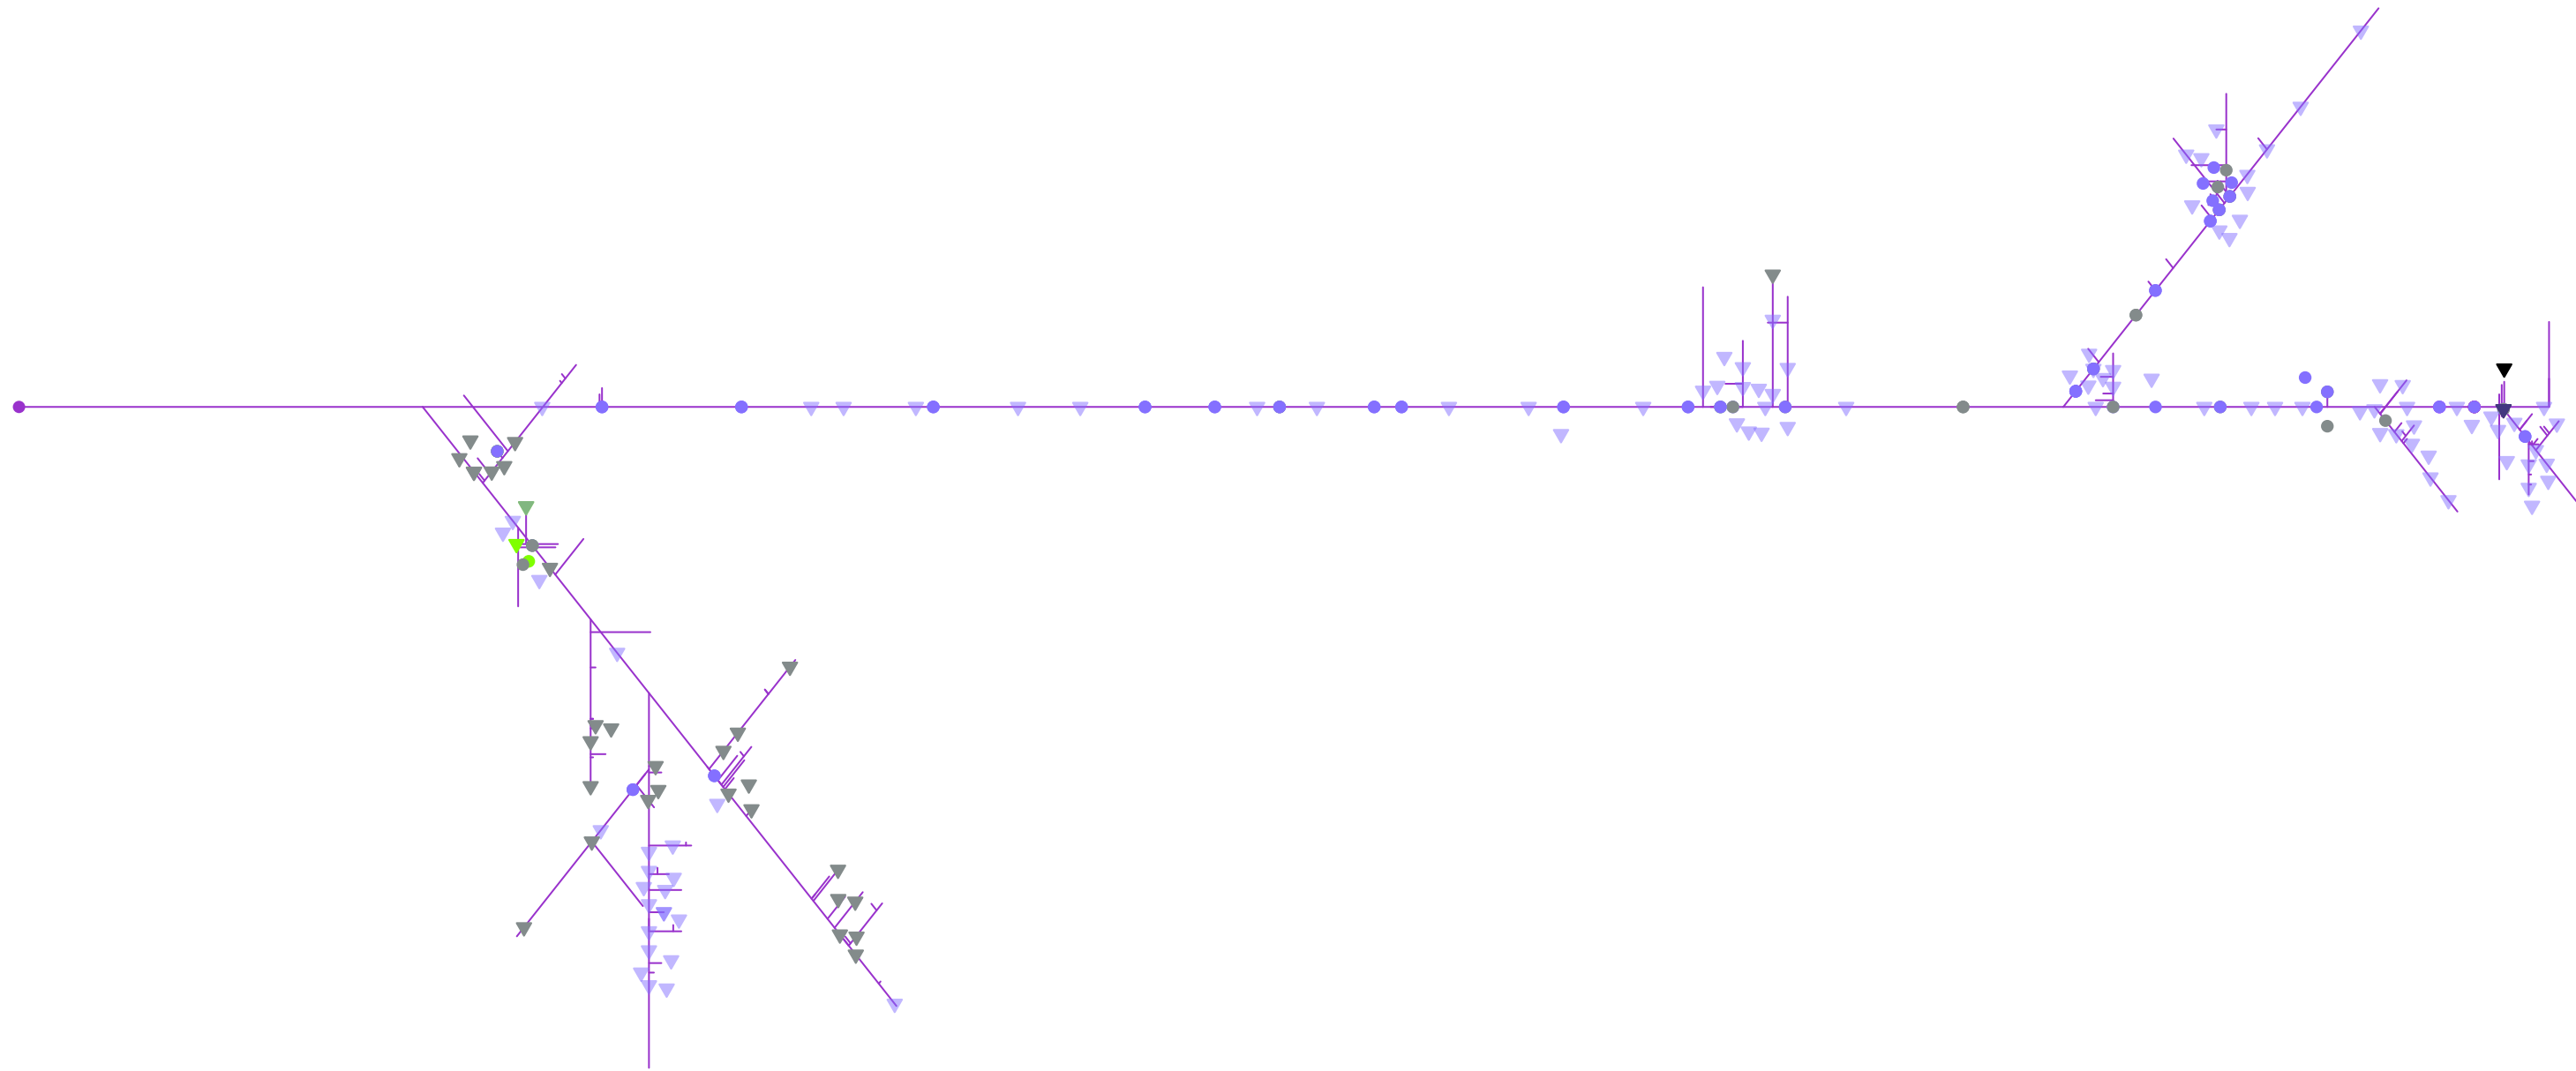

4 claw KC #6 (right)

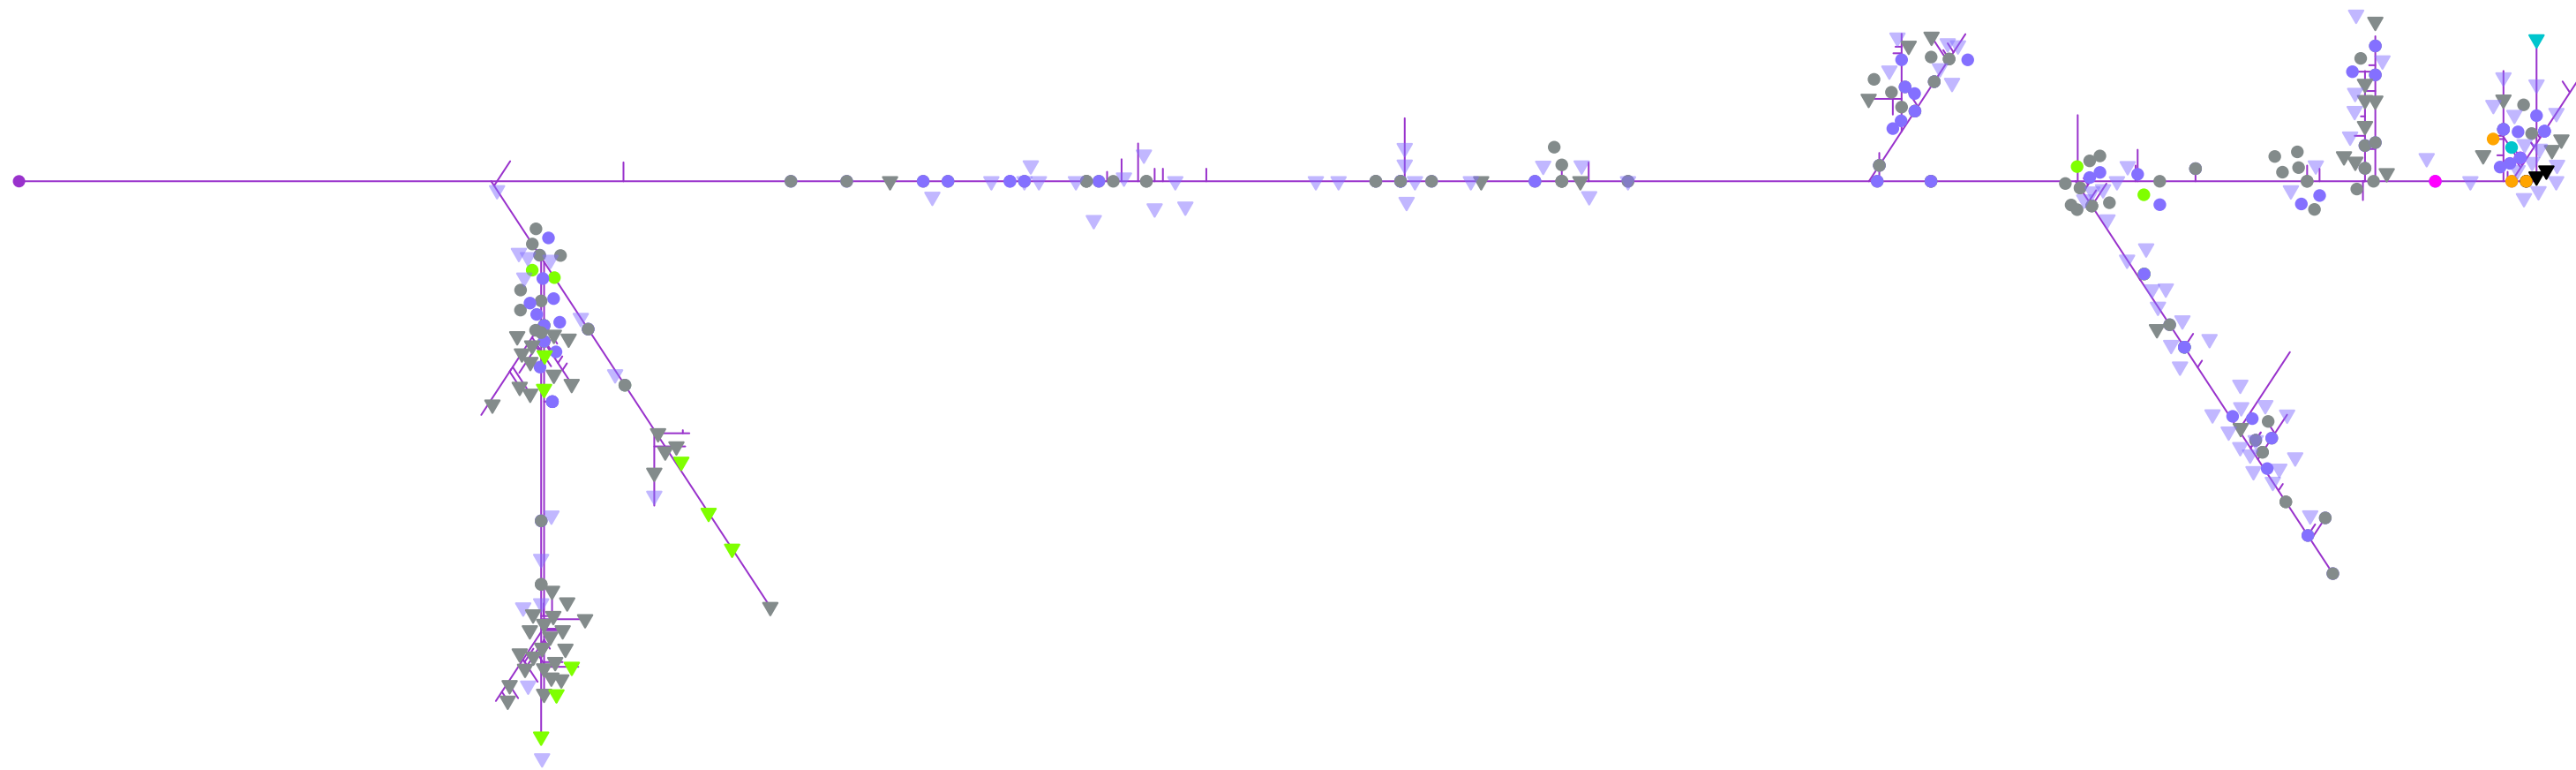

4 claw KC #7 (right)

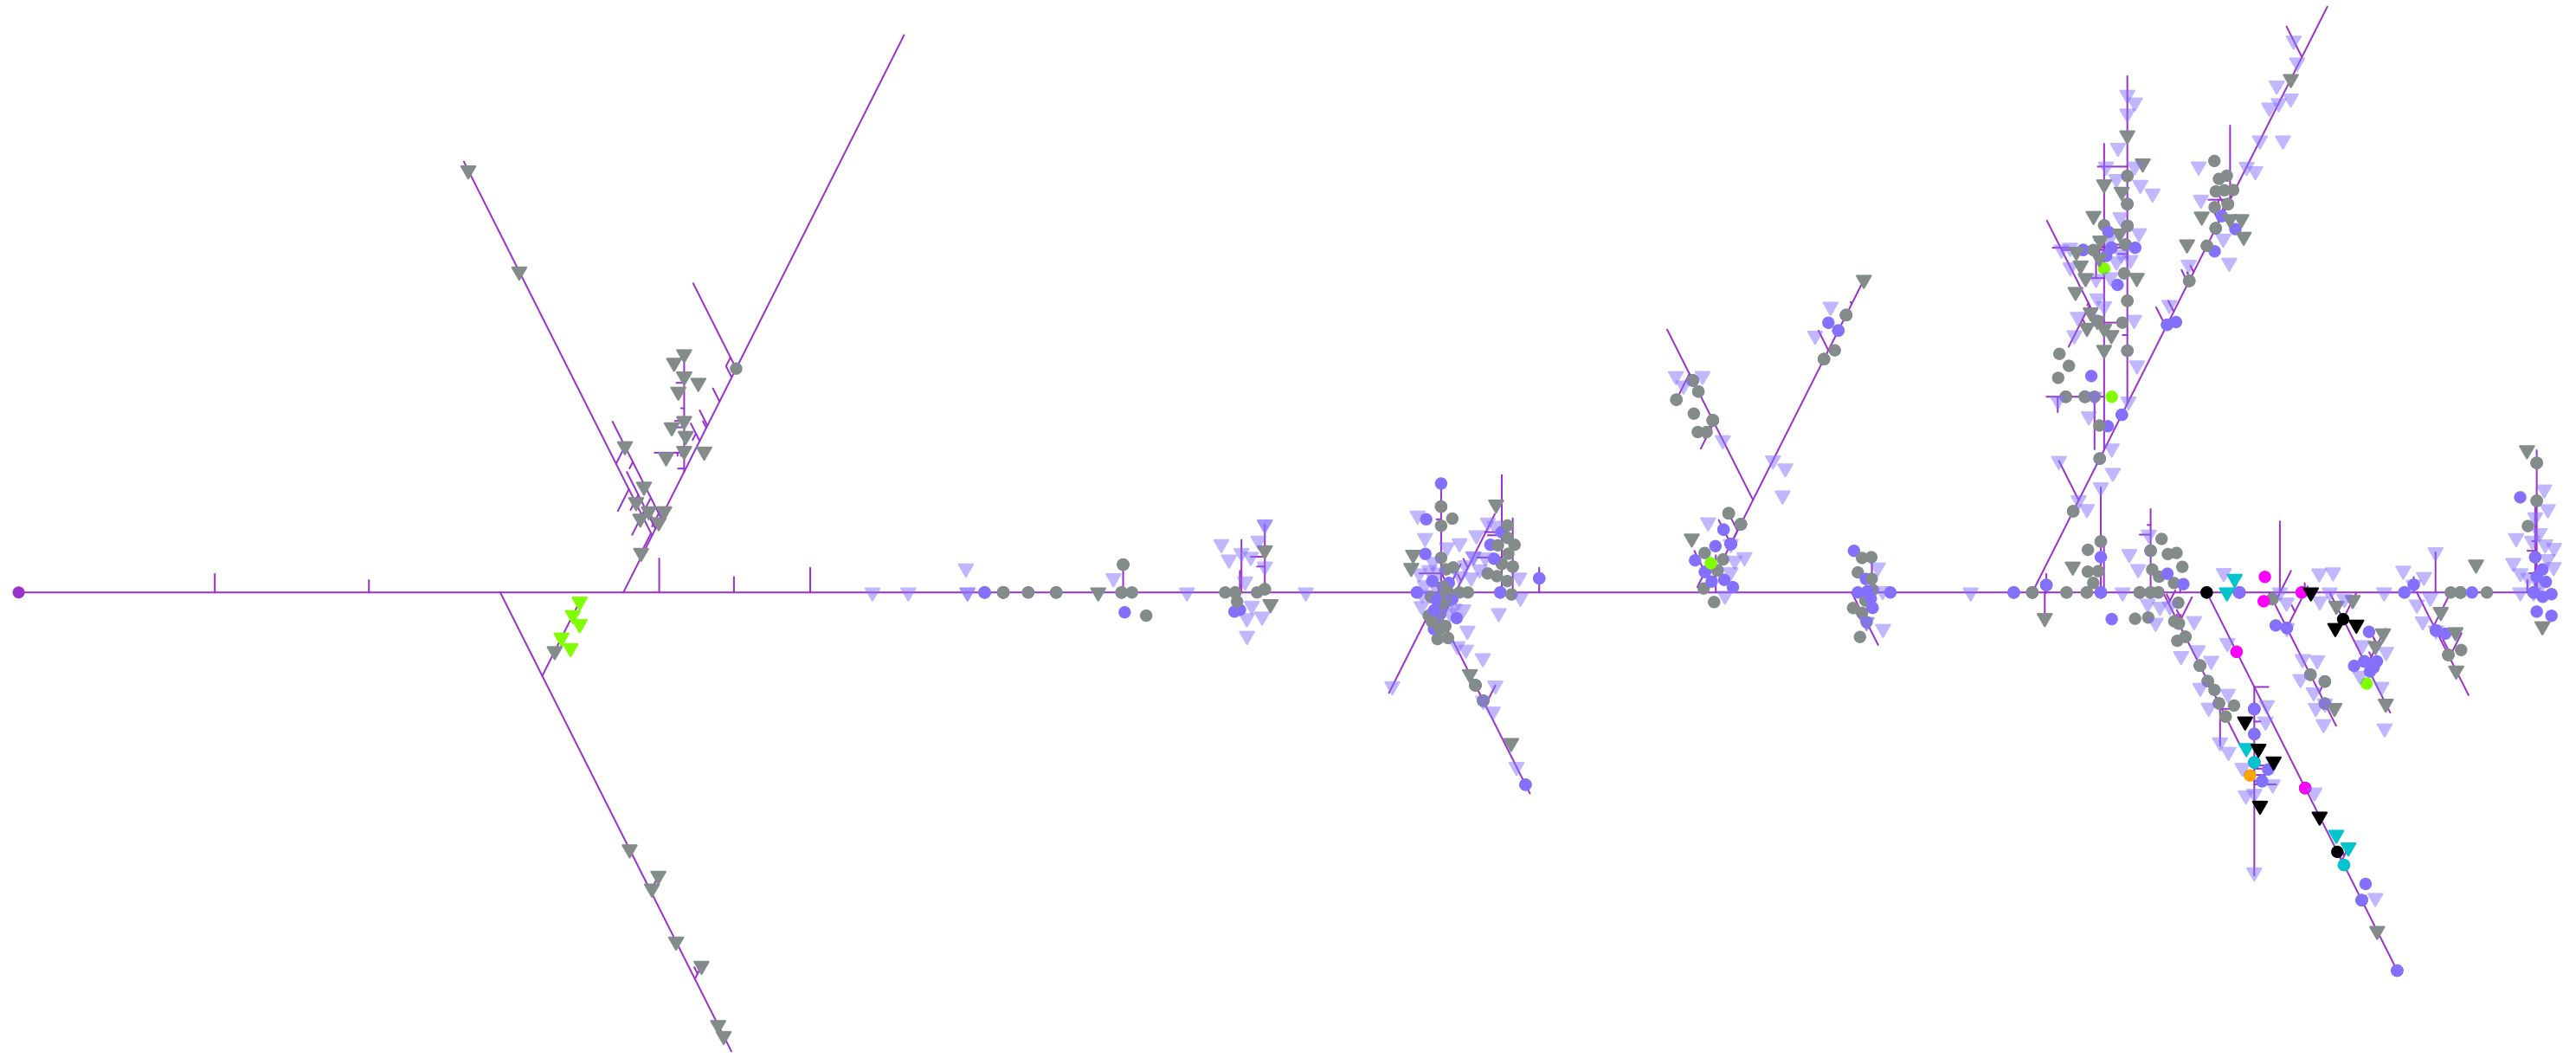

4 claw KC #8 (right)

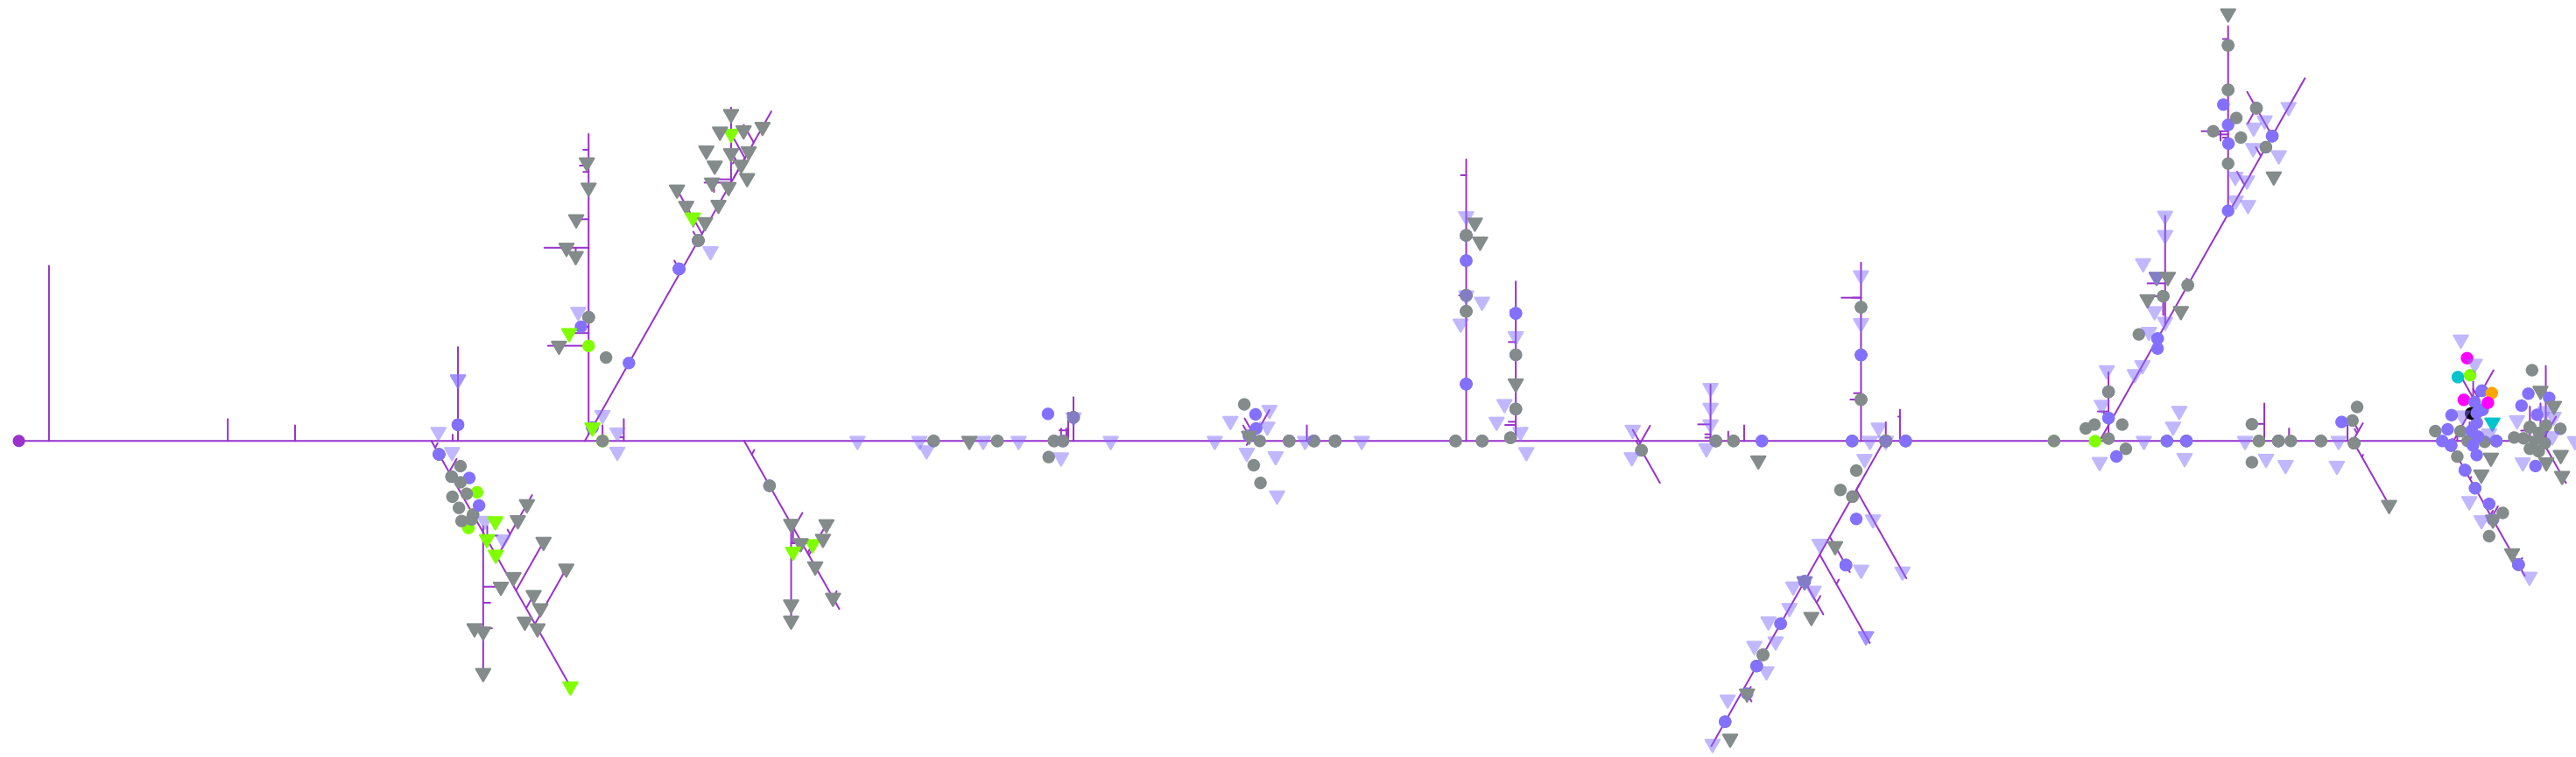

4 claw KC #9 (right)

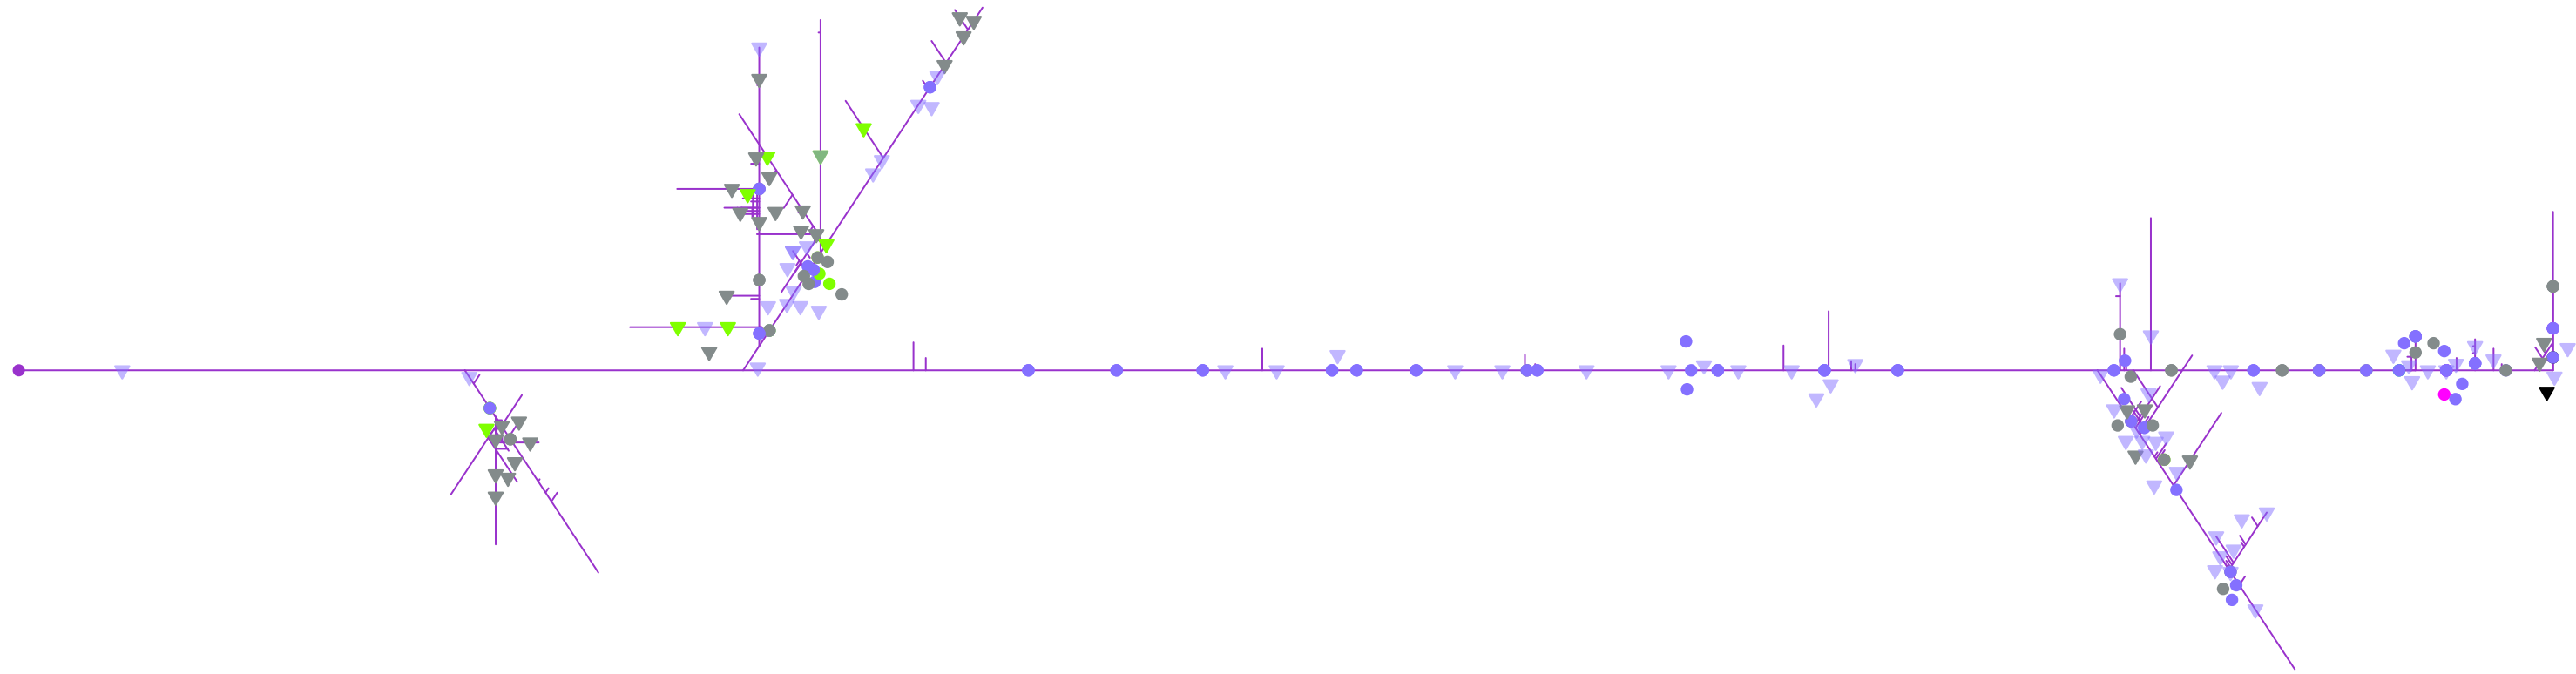



4 claw KC #10 (right)

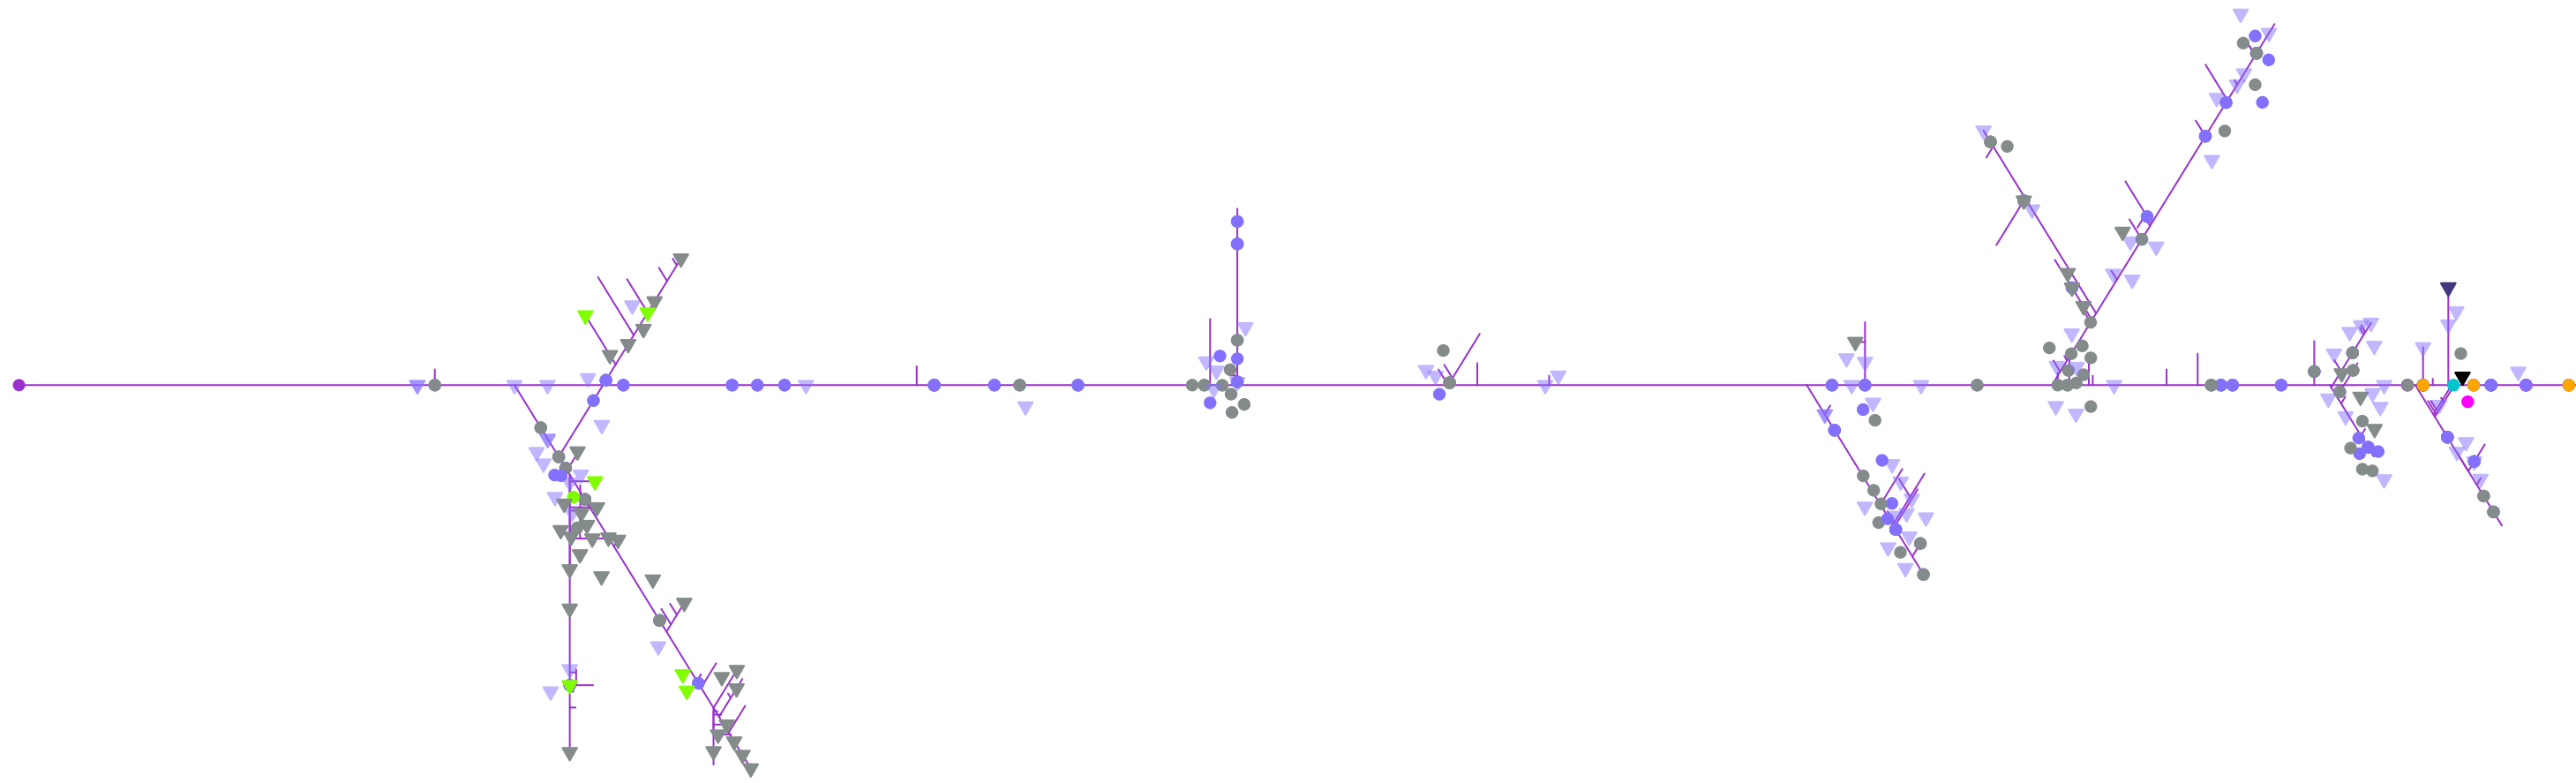



4 claw KC #12 (right)

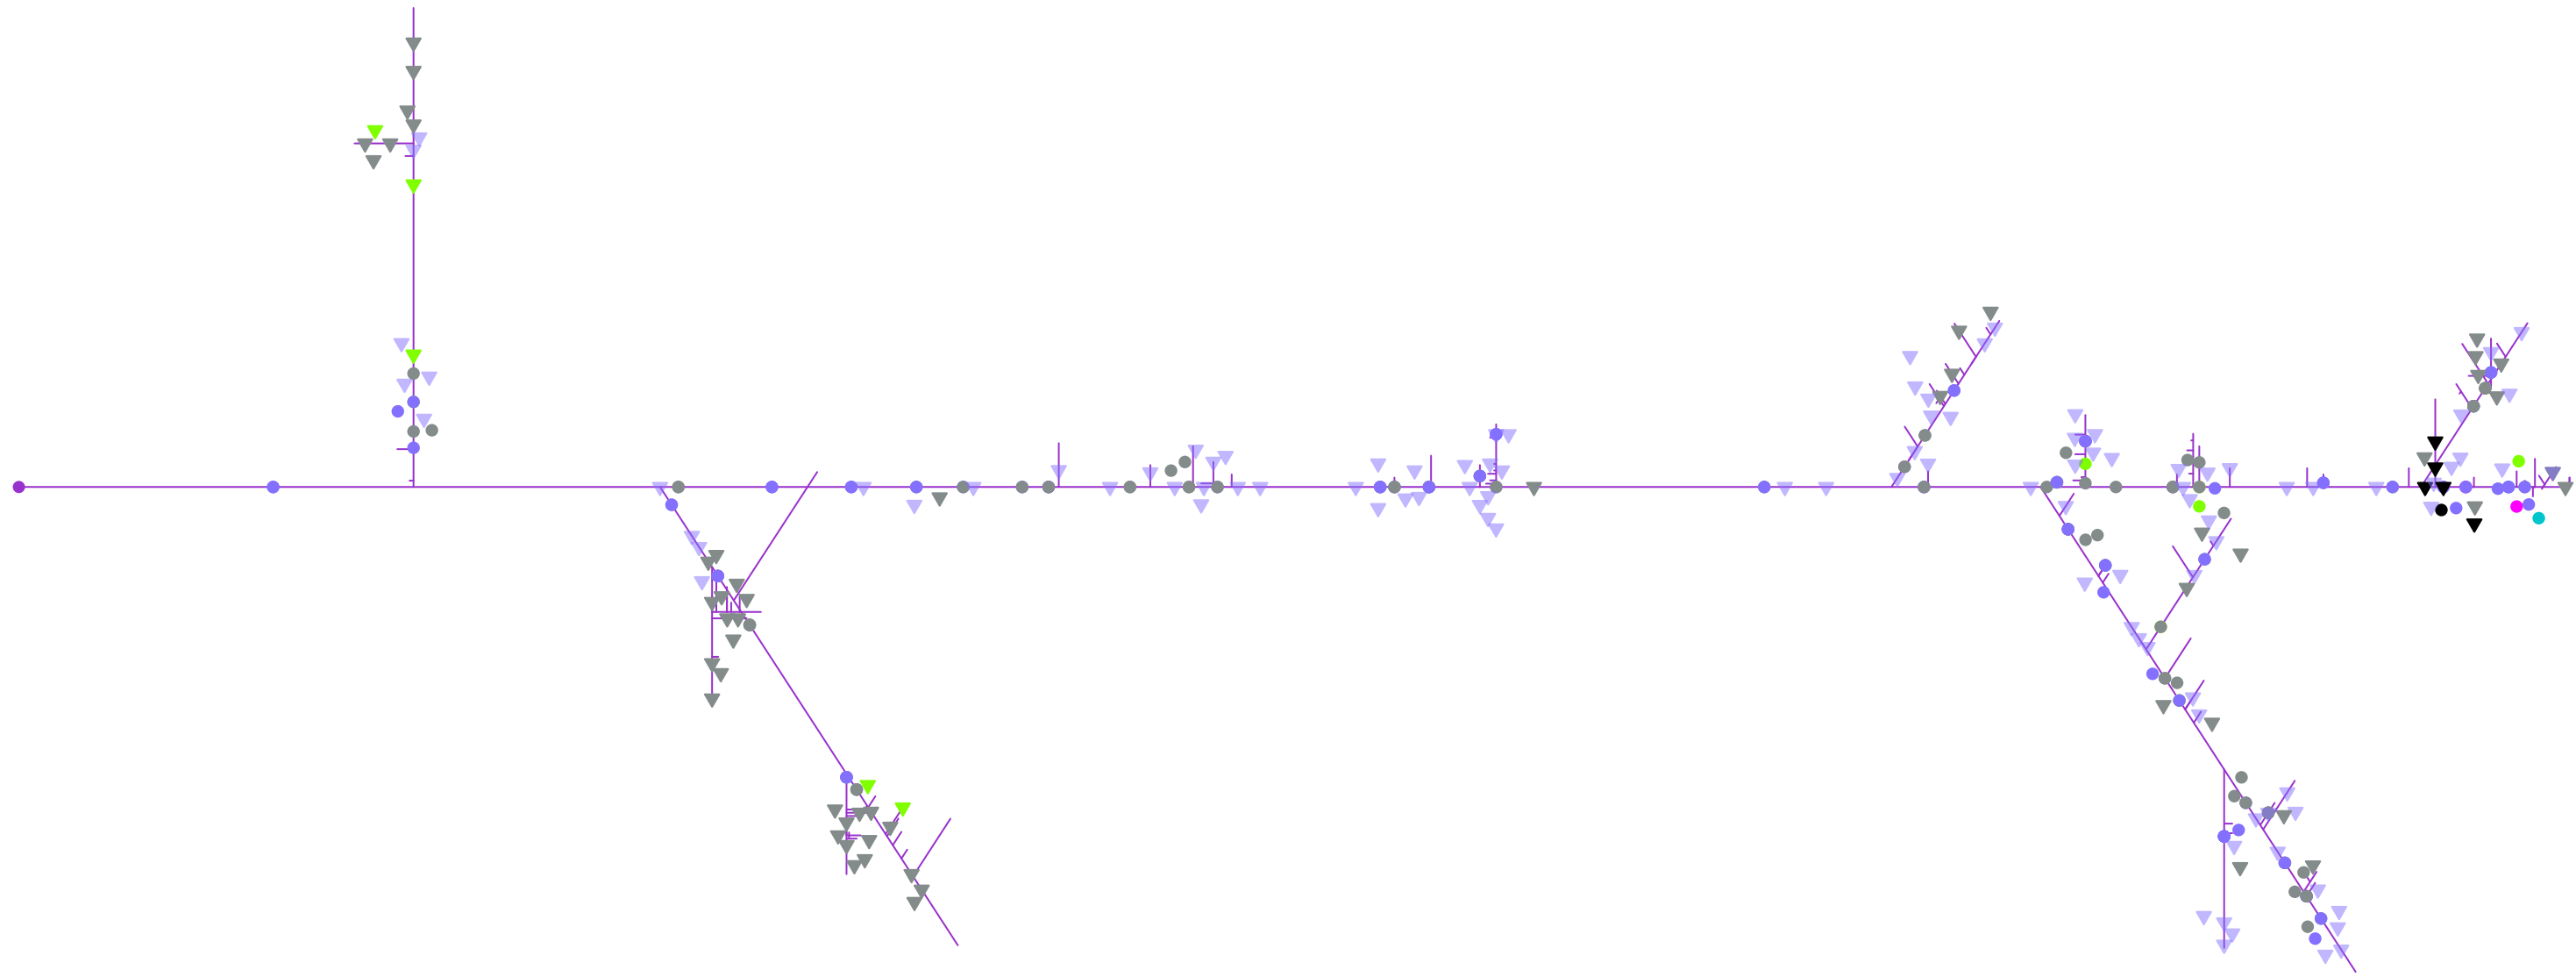

4 claw KC #13 (right)

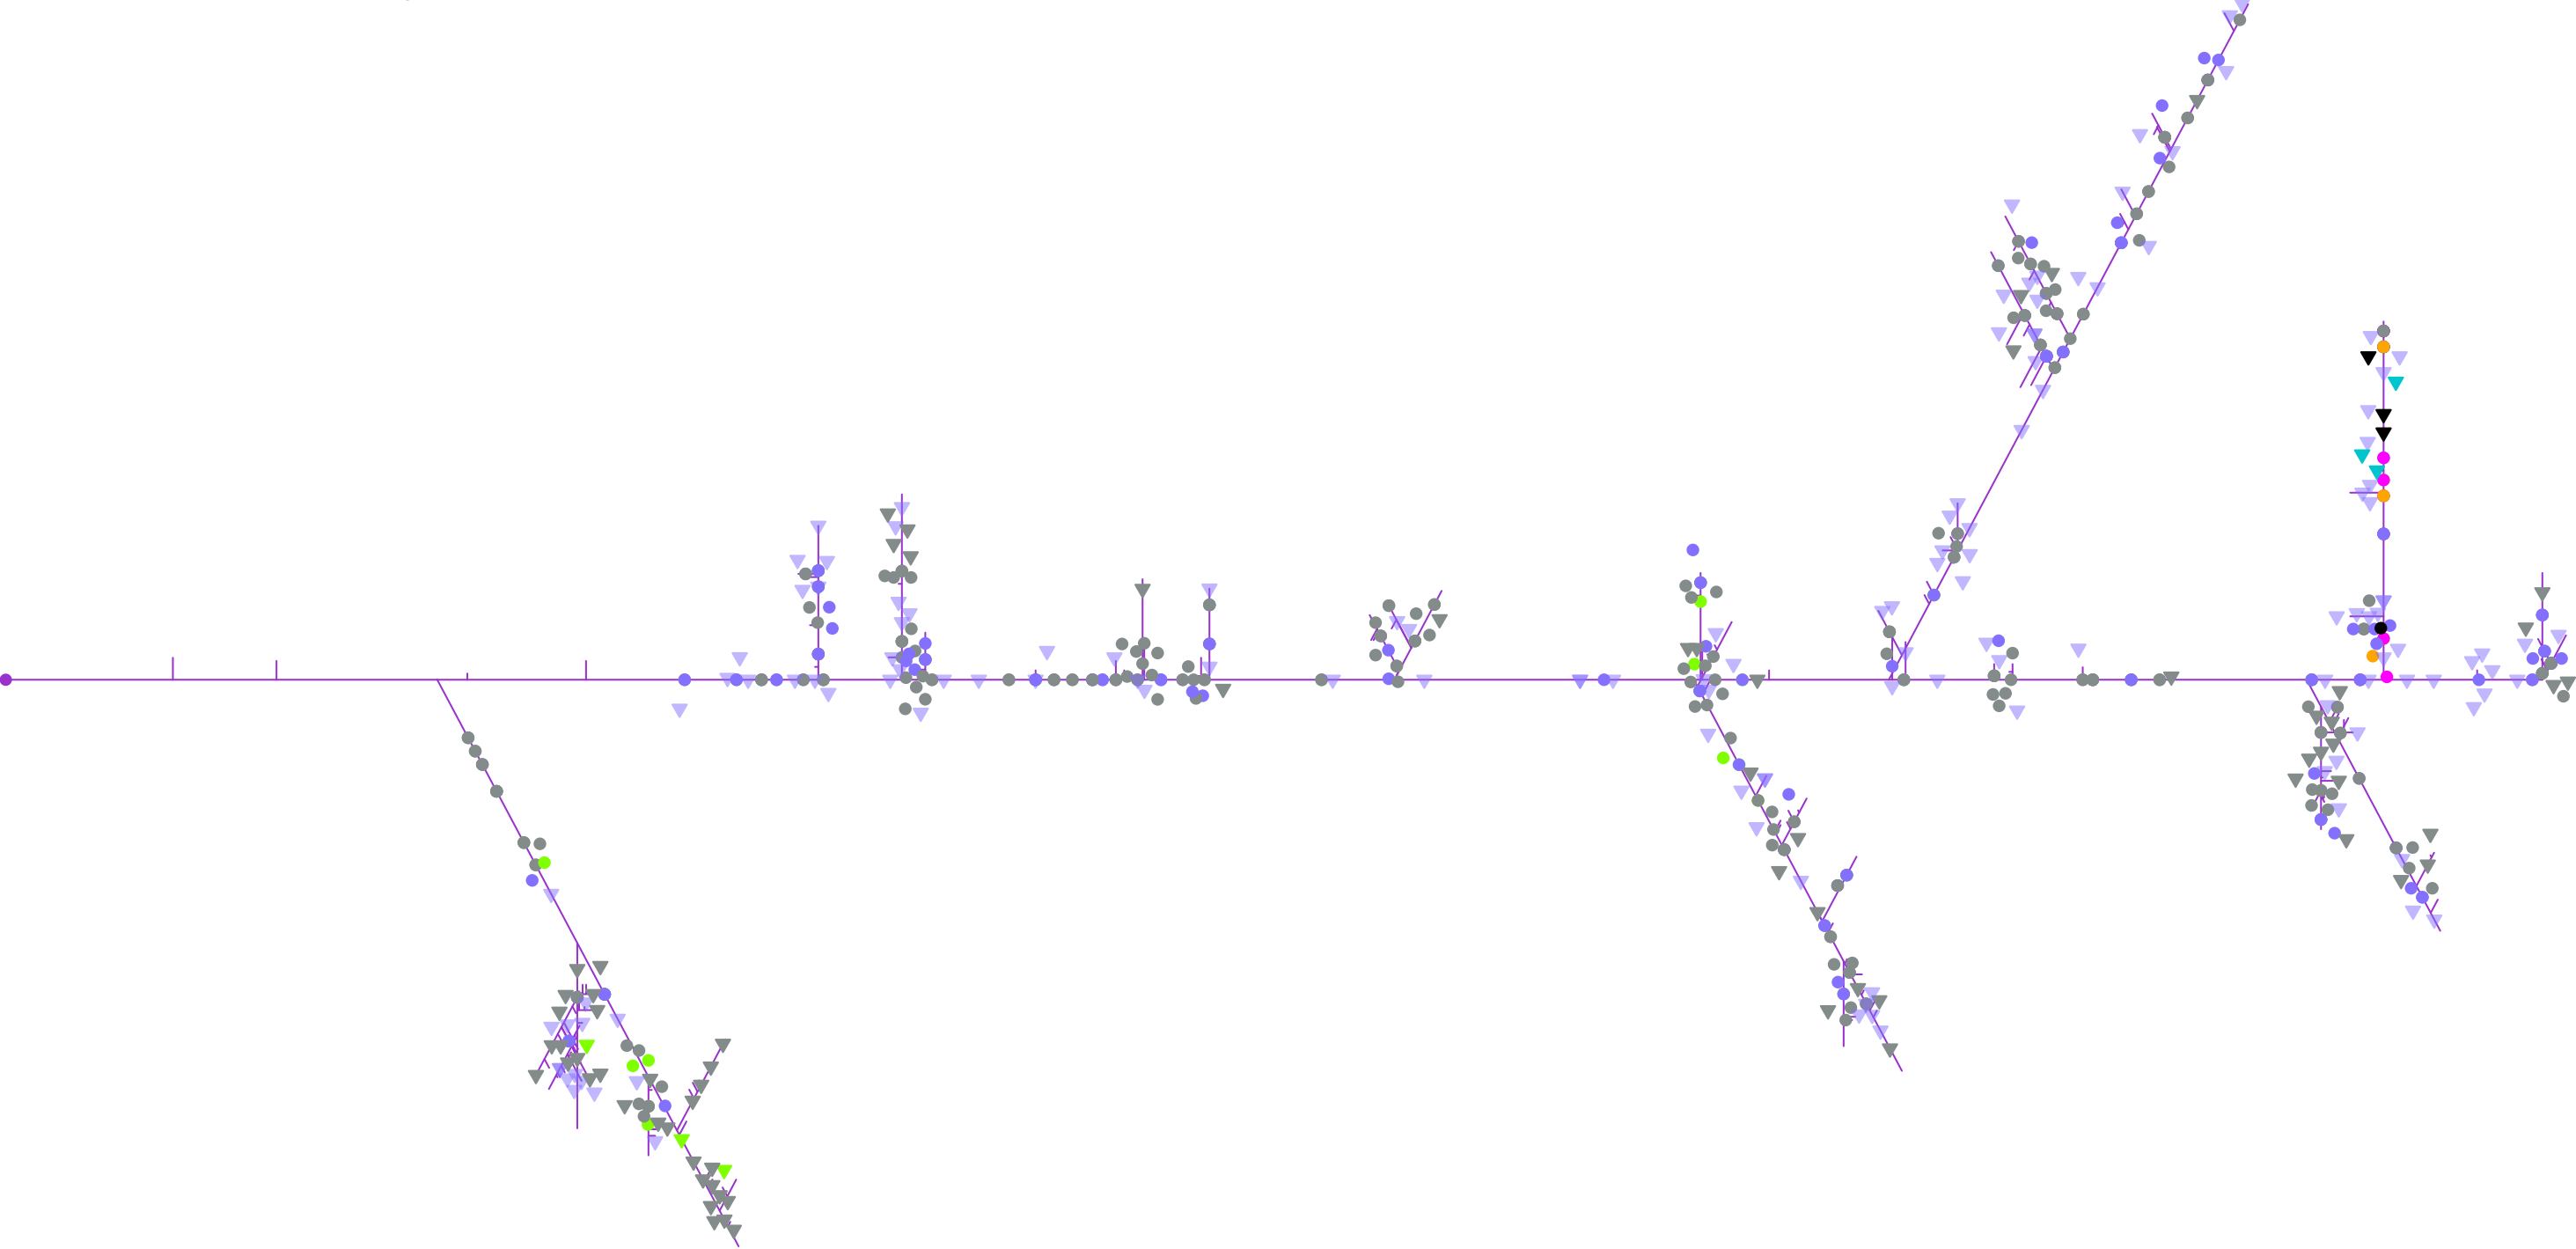

4 claw KC #14 (right)

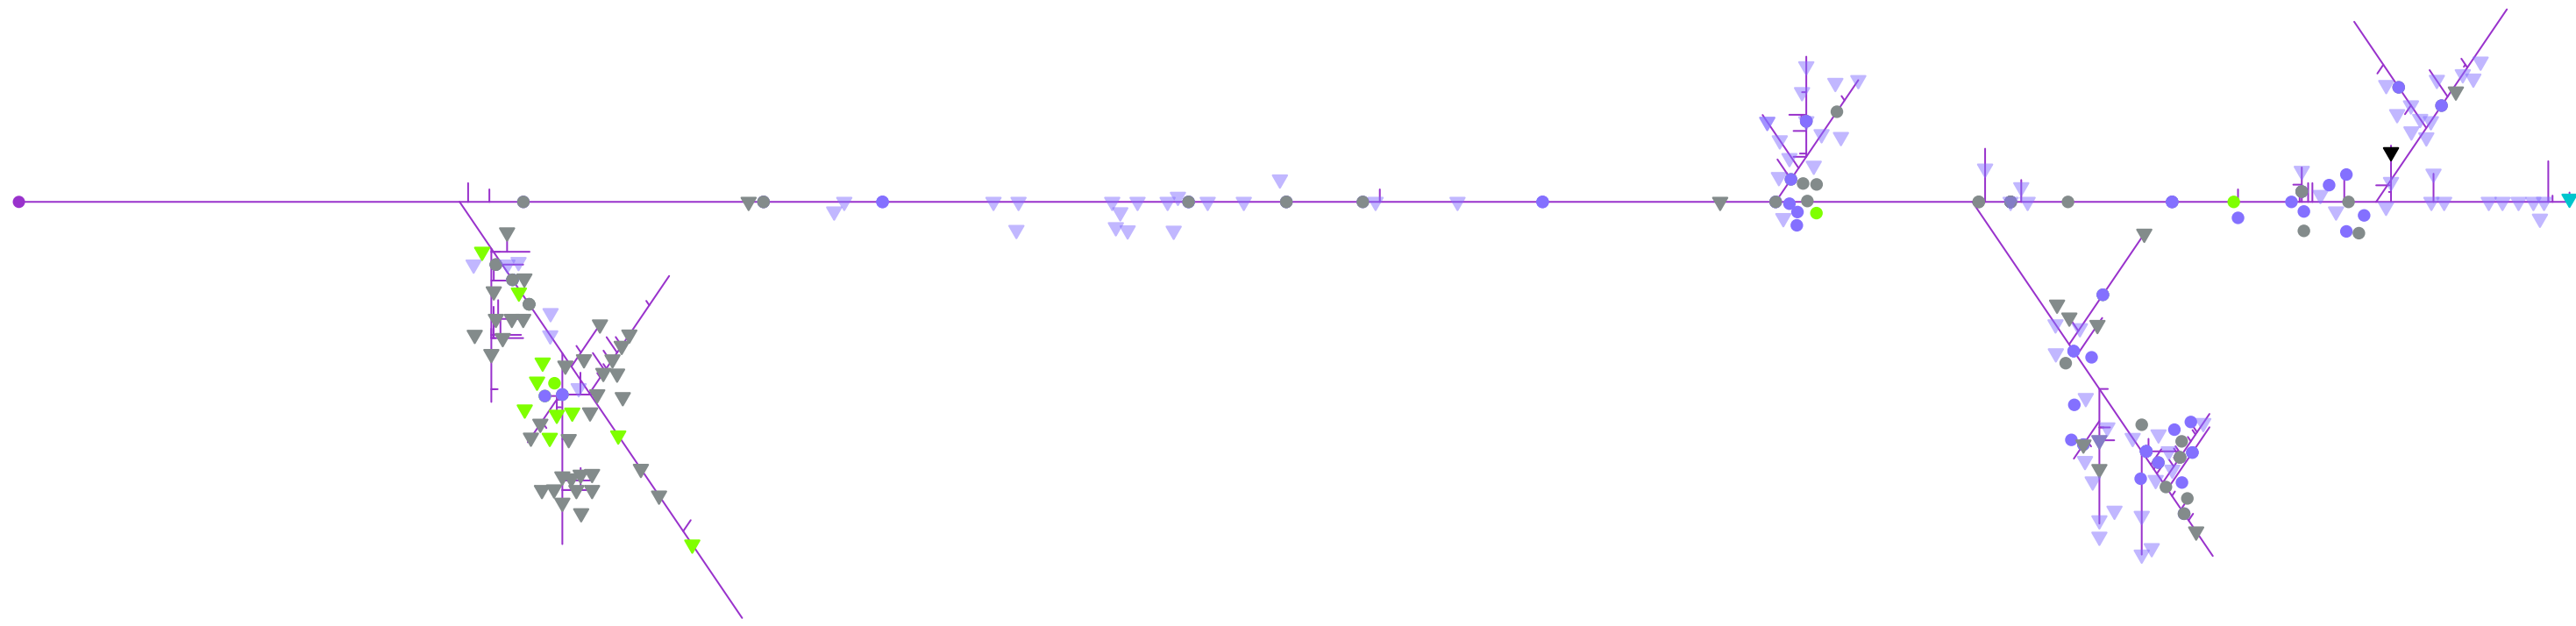

4 claw KC #15 (right)

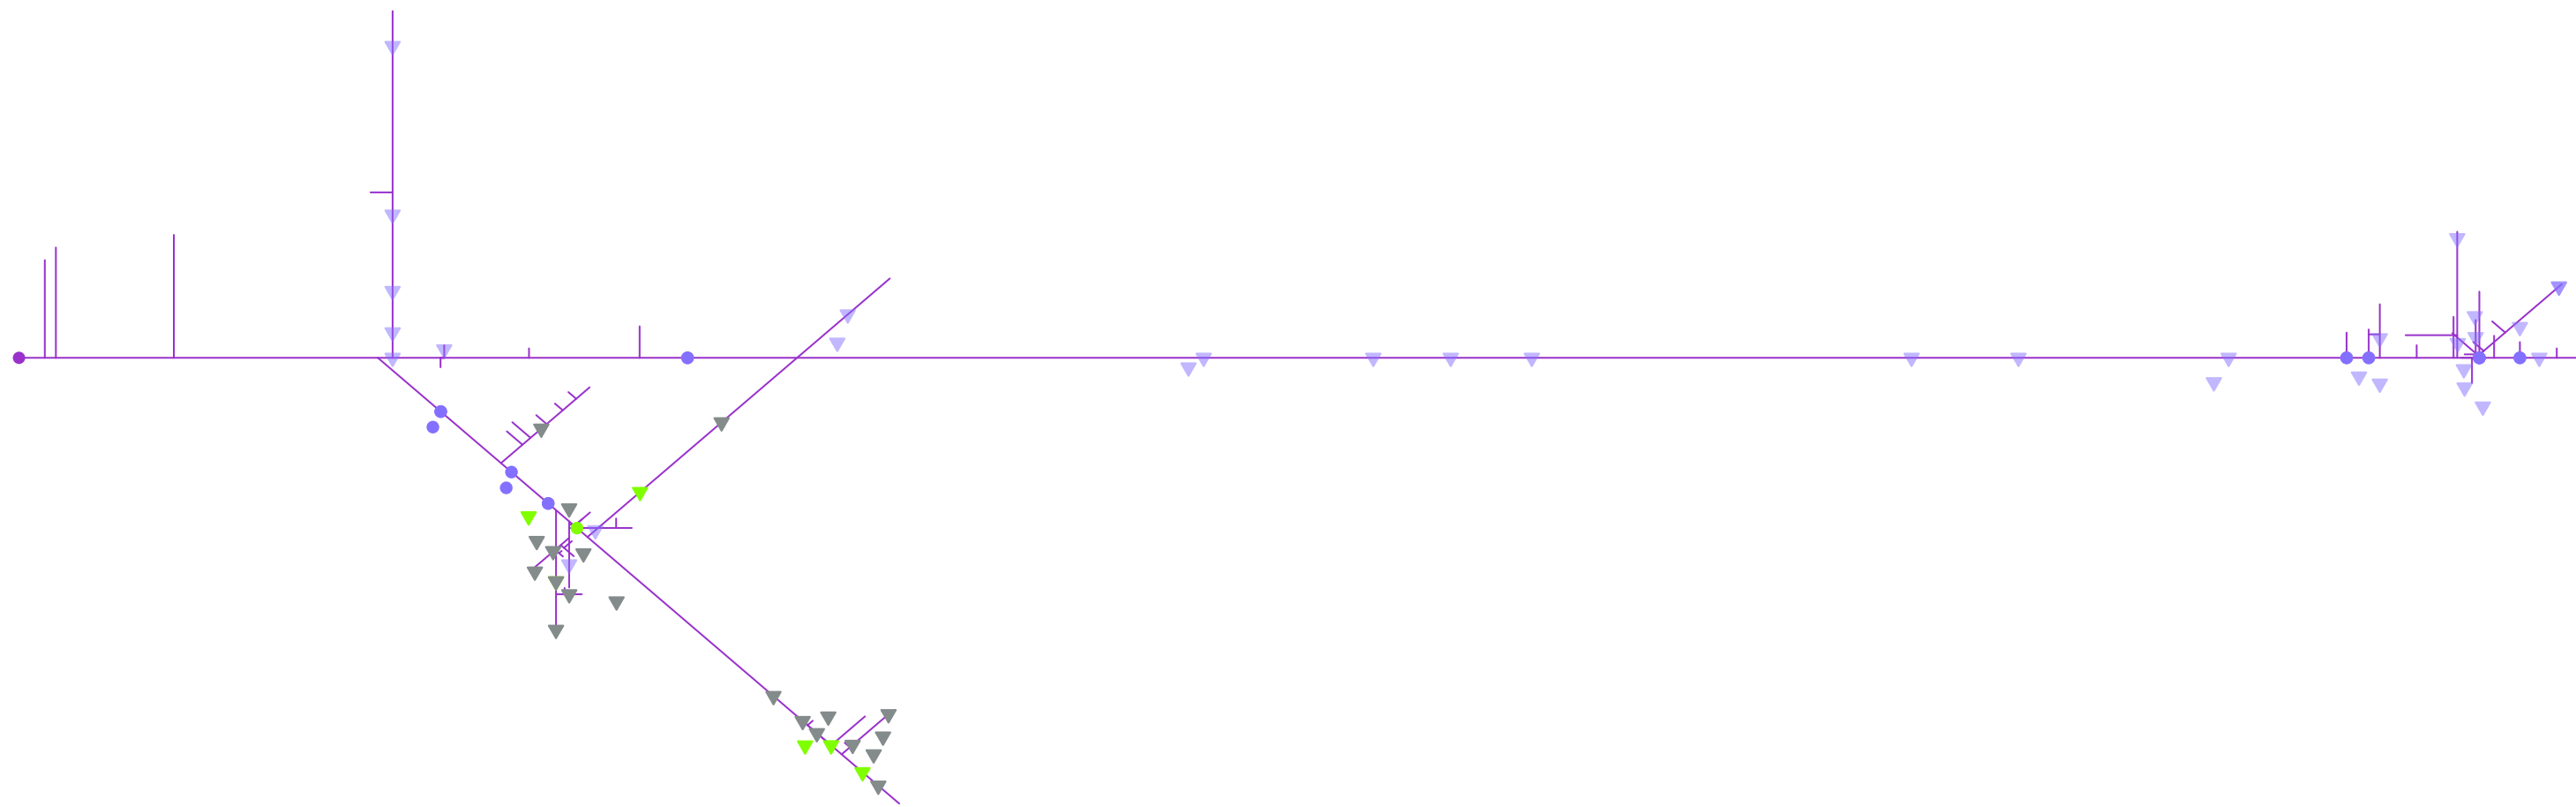

5 claw KC #1 (right)

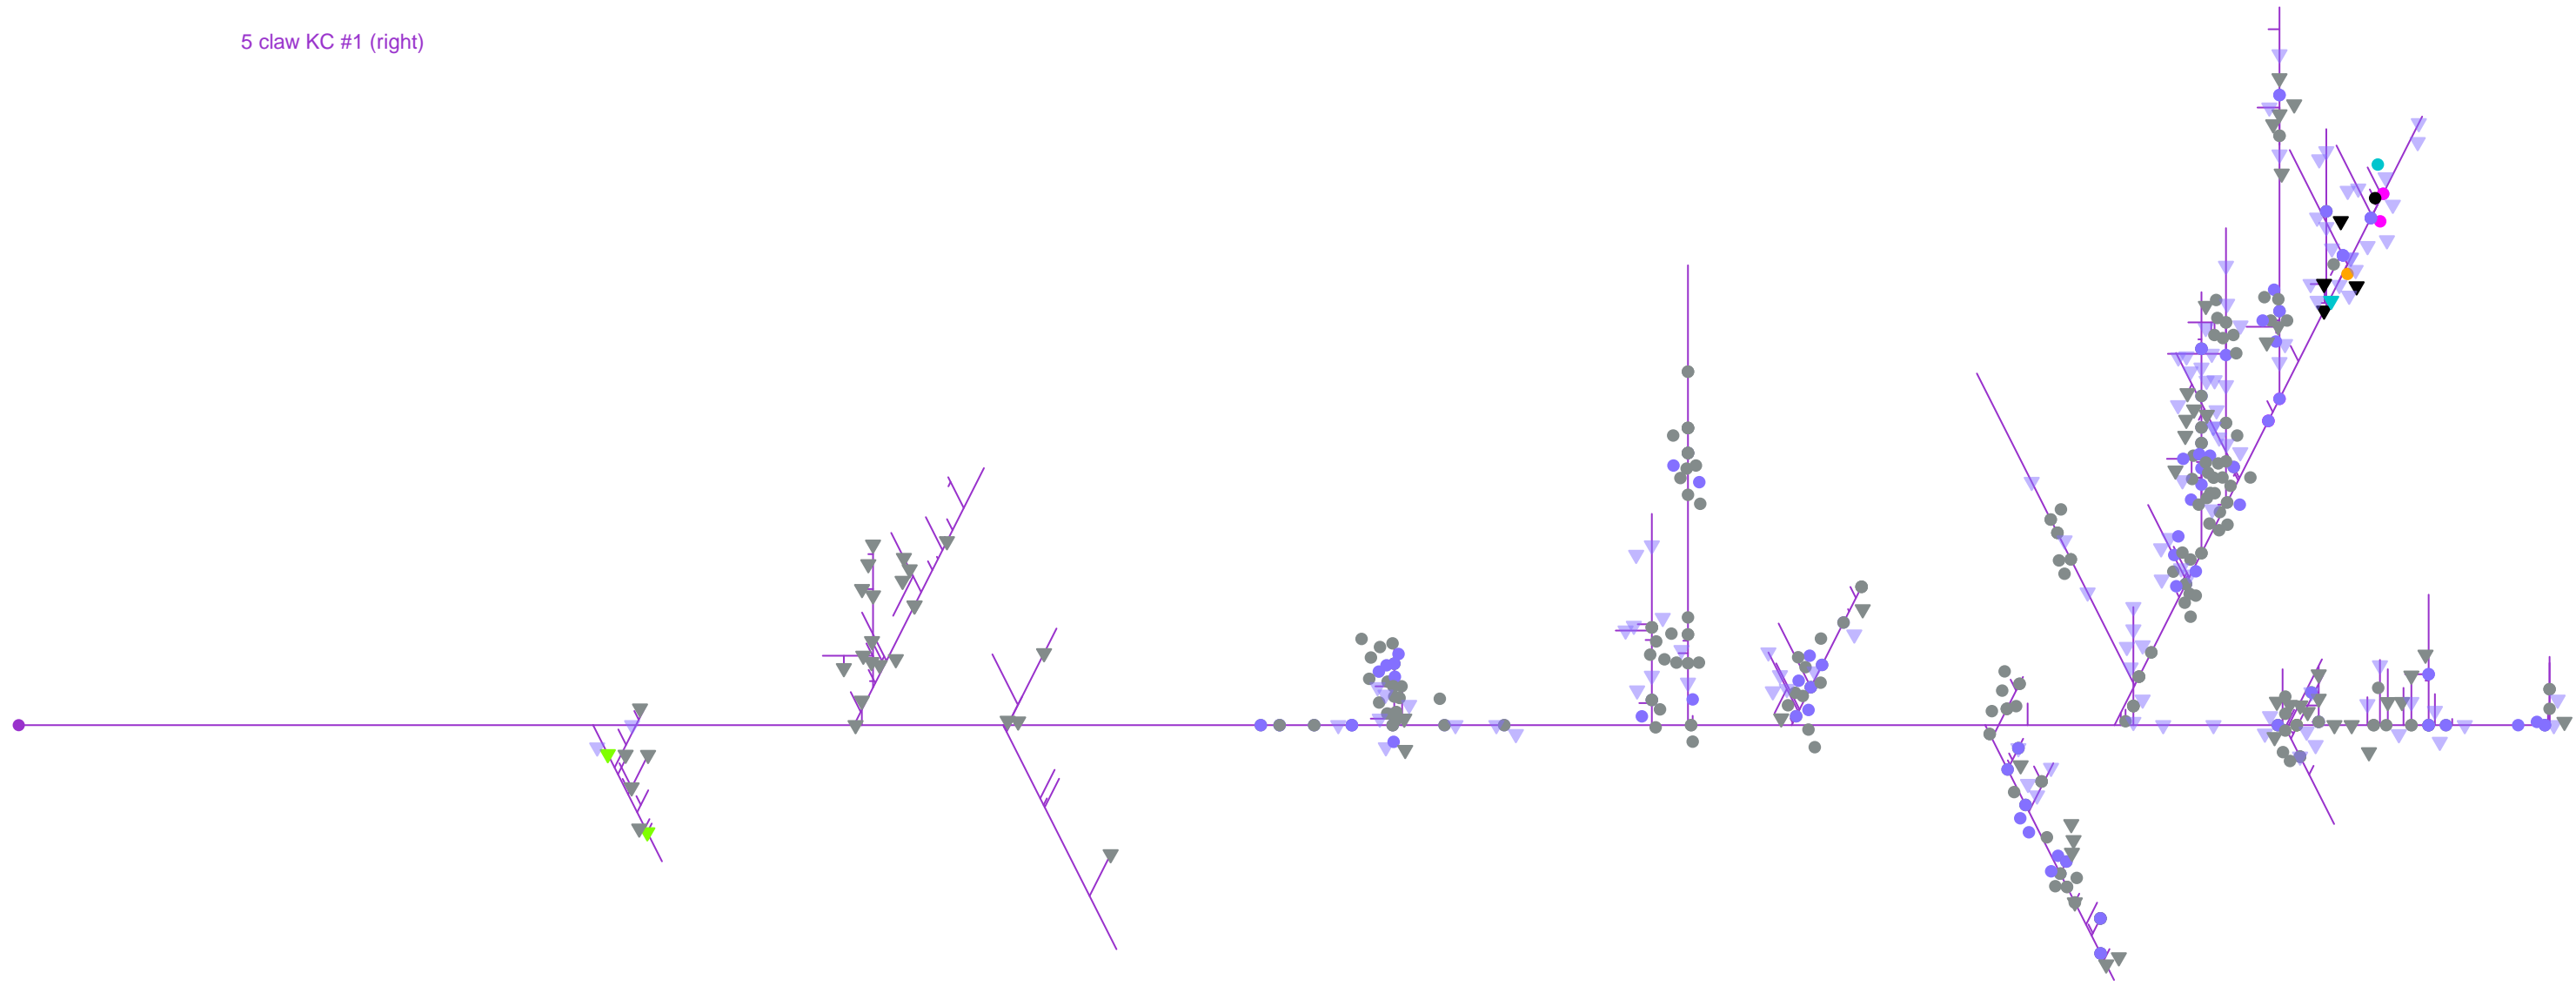

5 claw KC #2 (right)

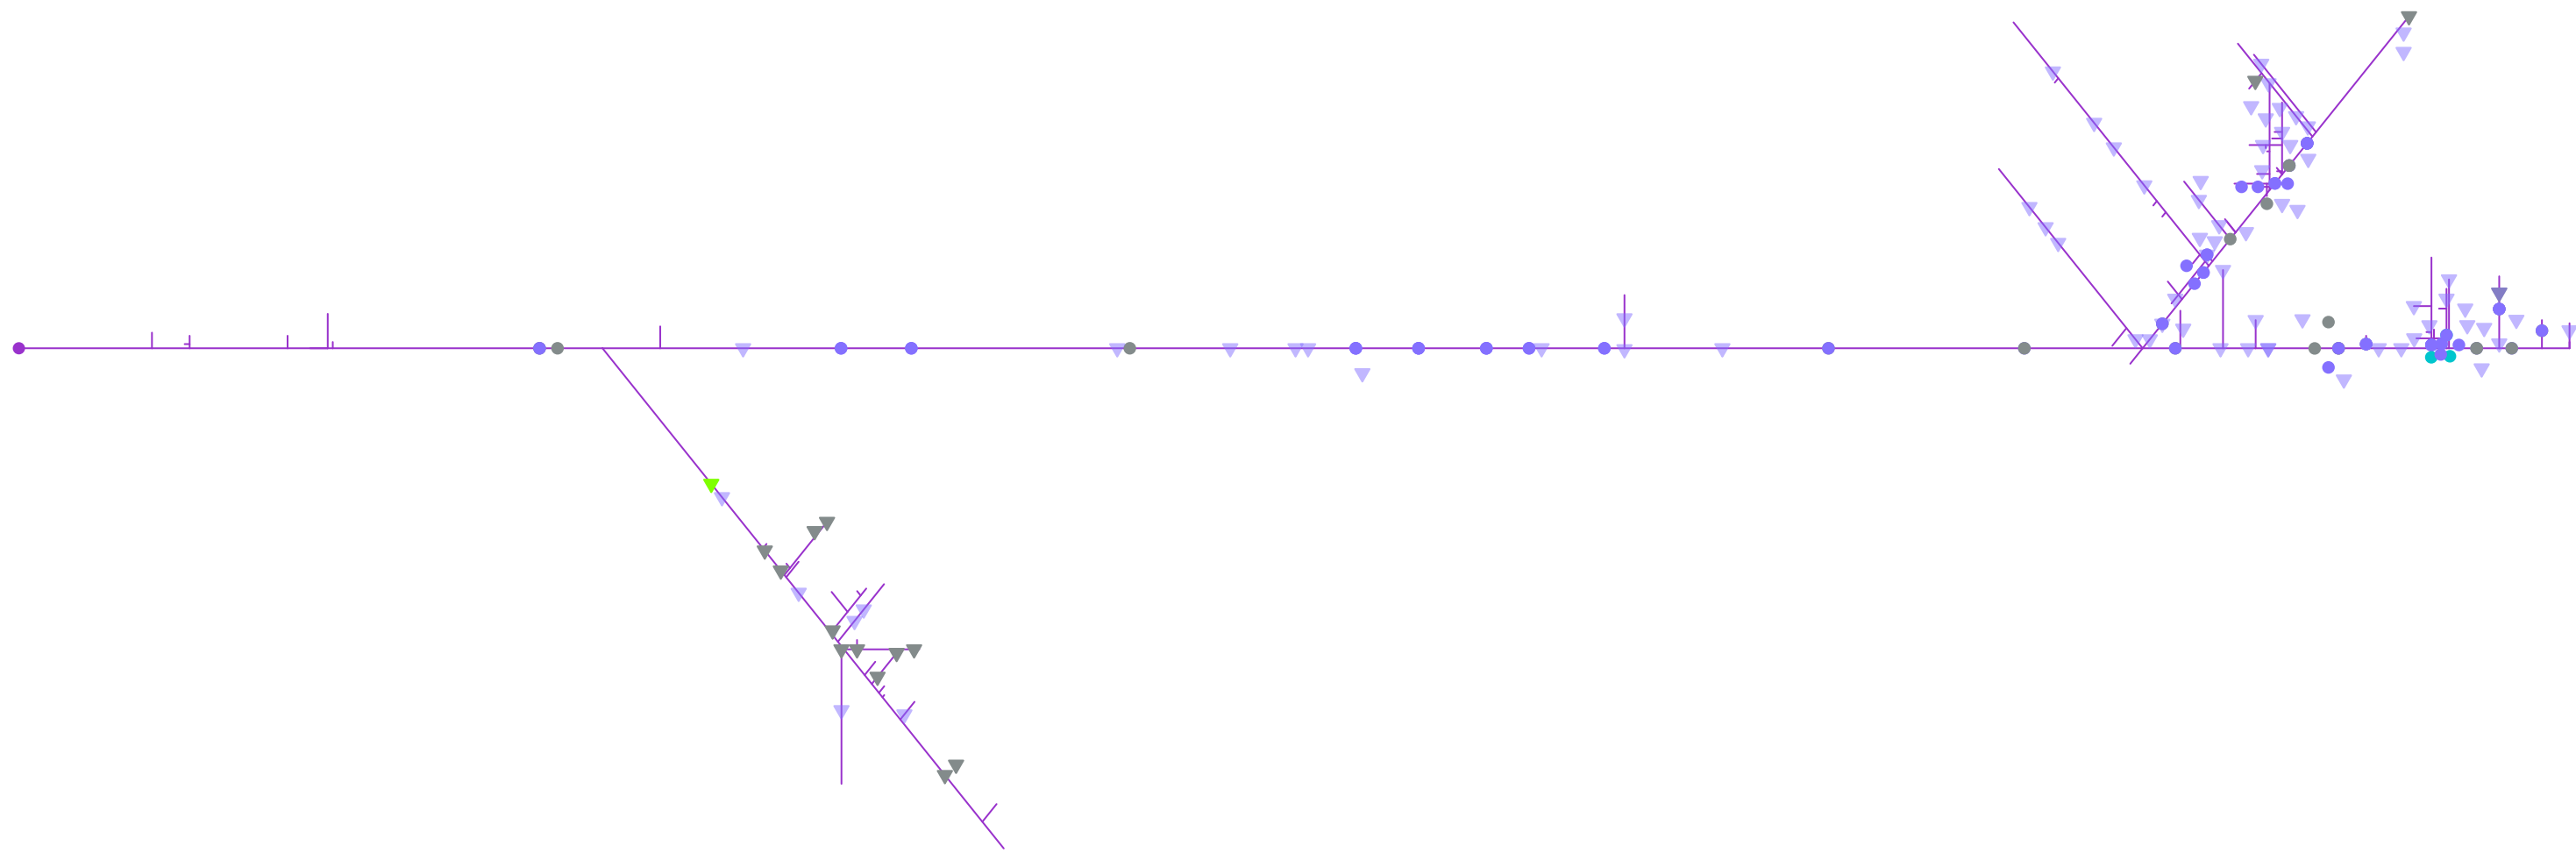



5 claw KC #3 (right)

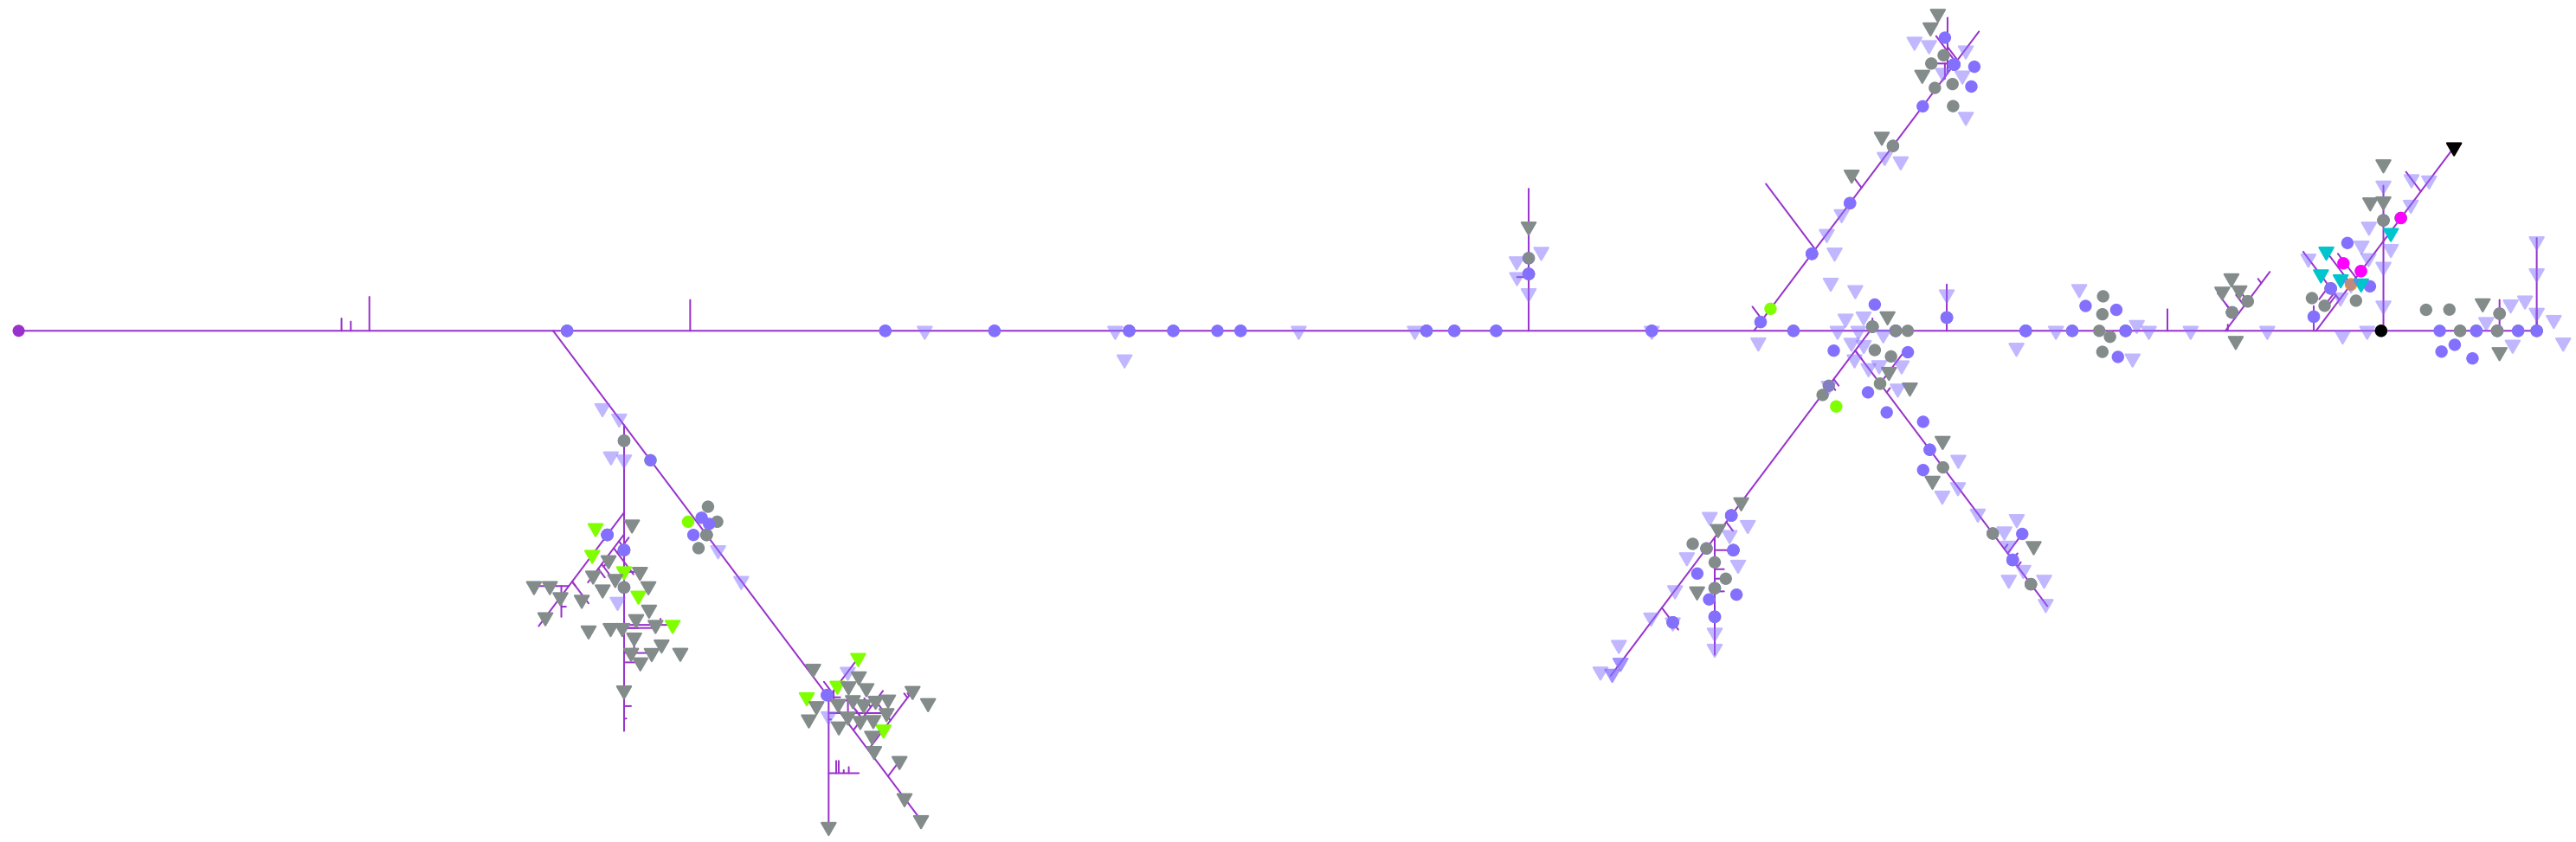

5 claw KC #4 (right)

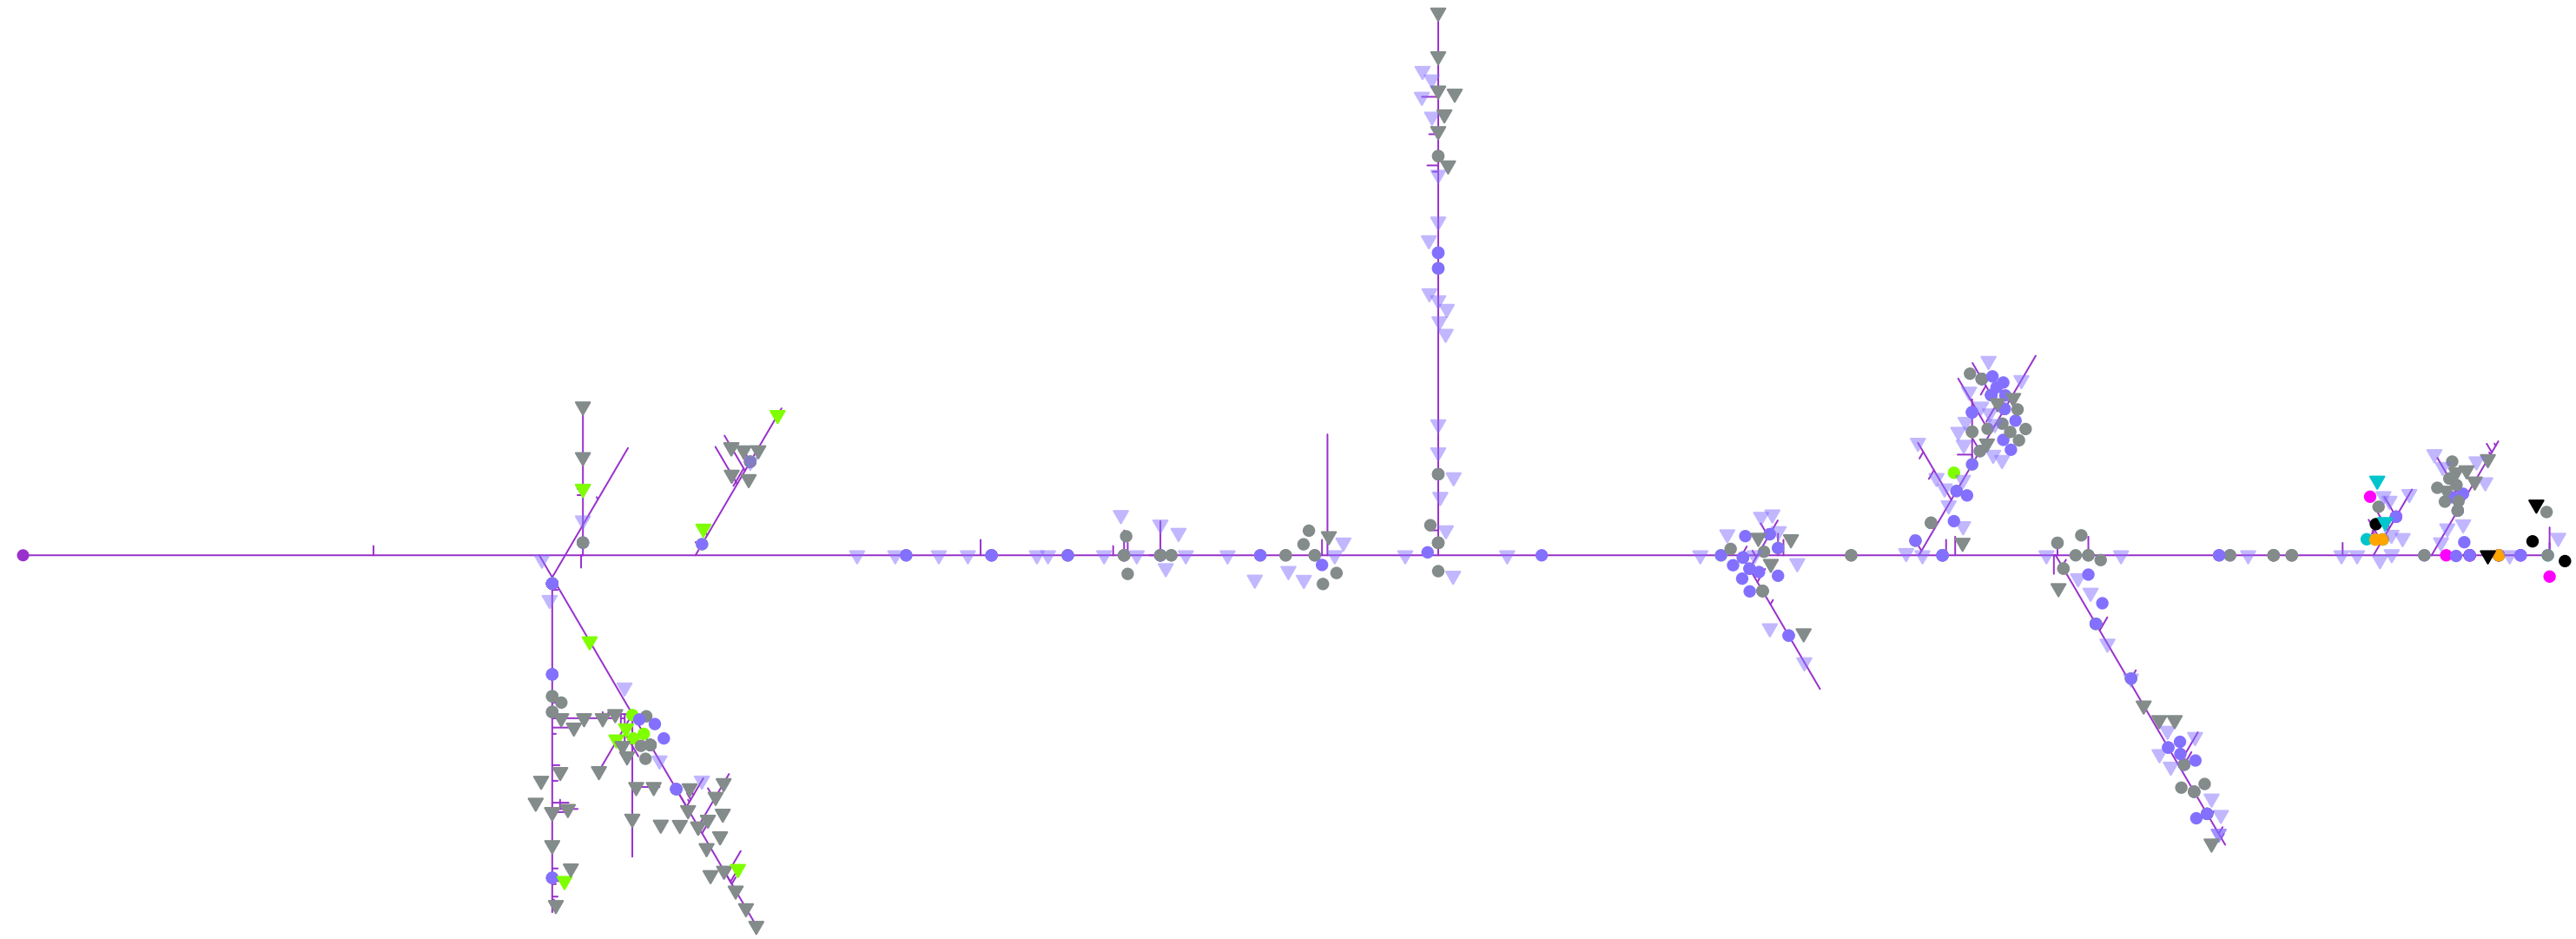

5 claw KC #5 (right)

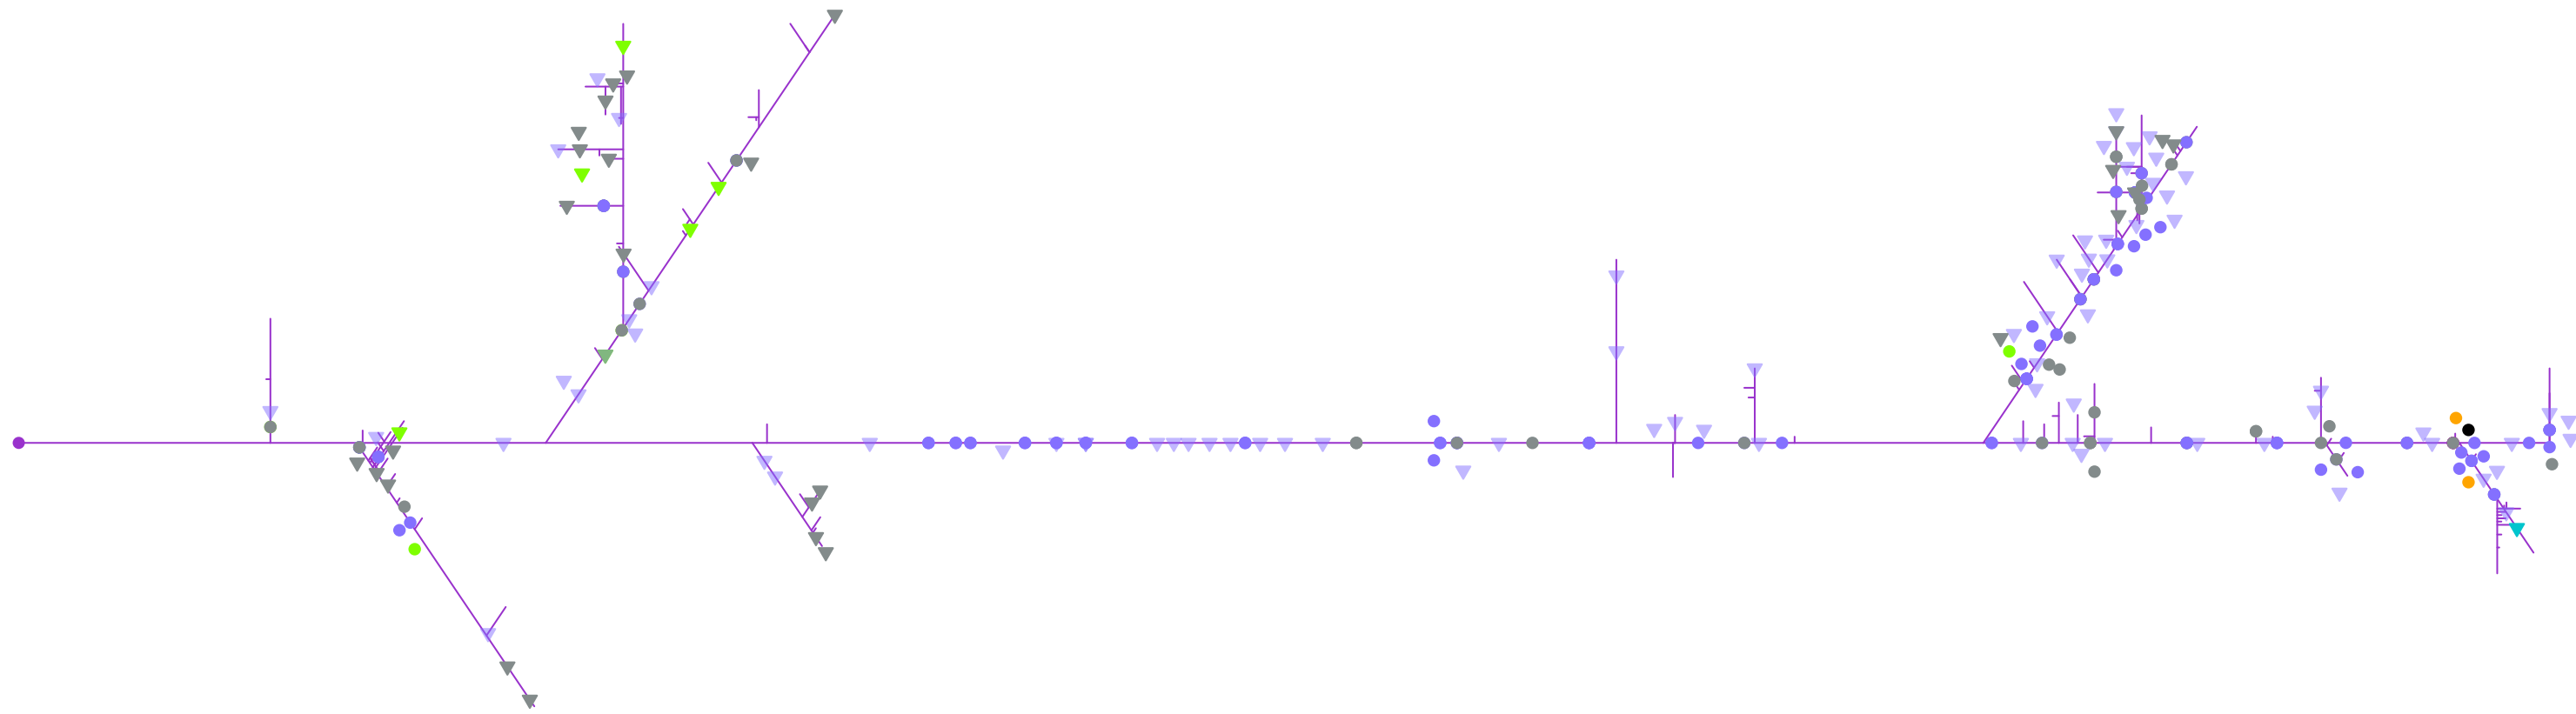

5 claw KC #6 (right)

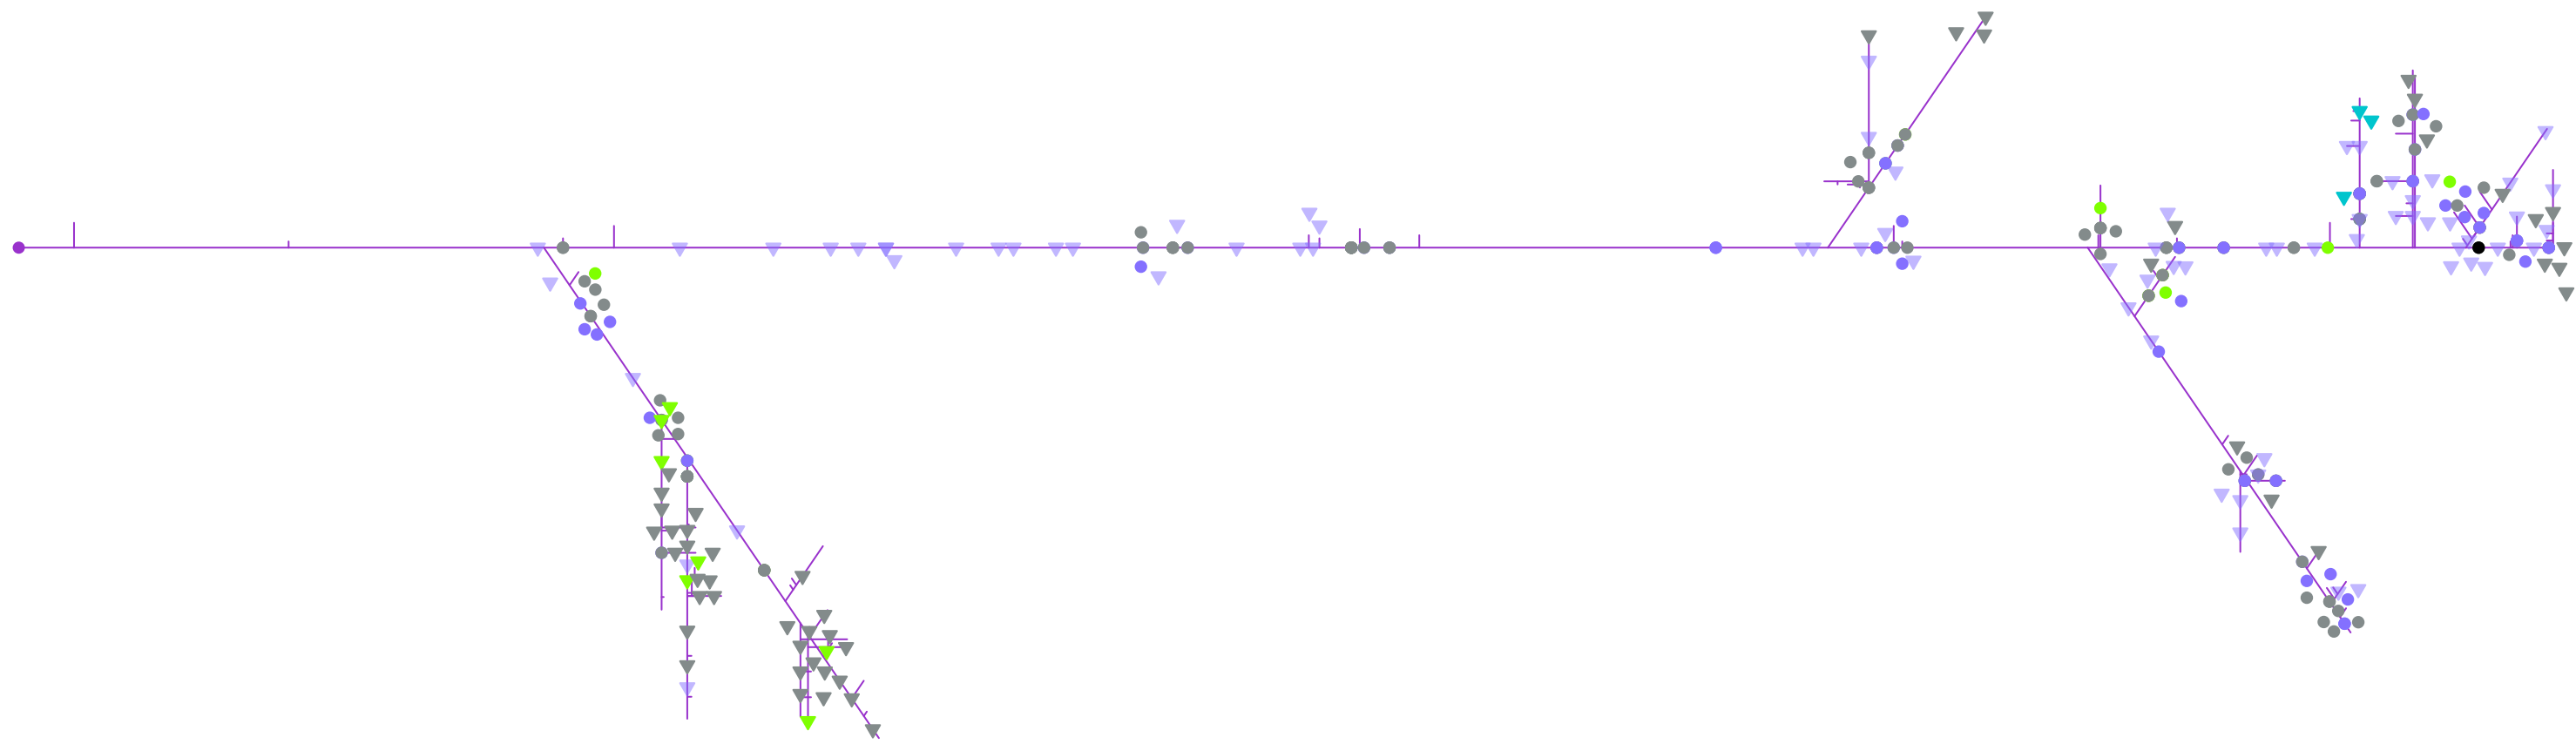

5 claw KC #7 (right)

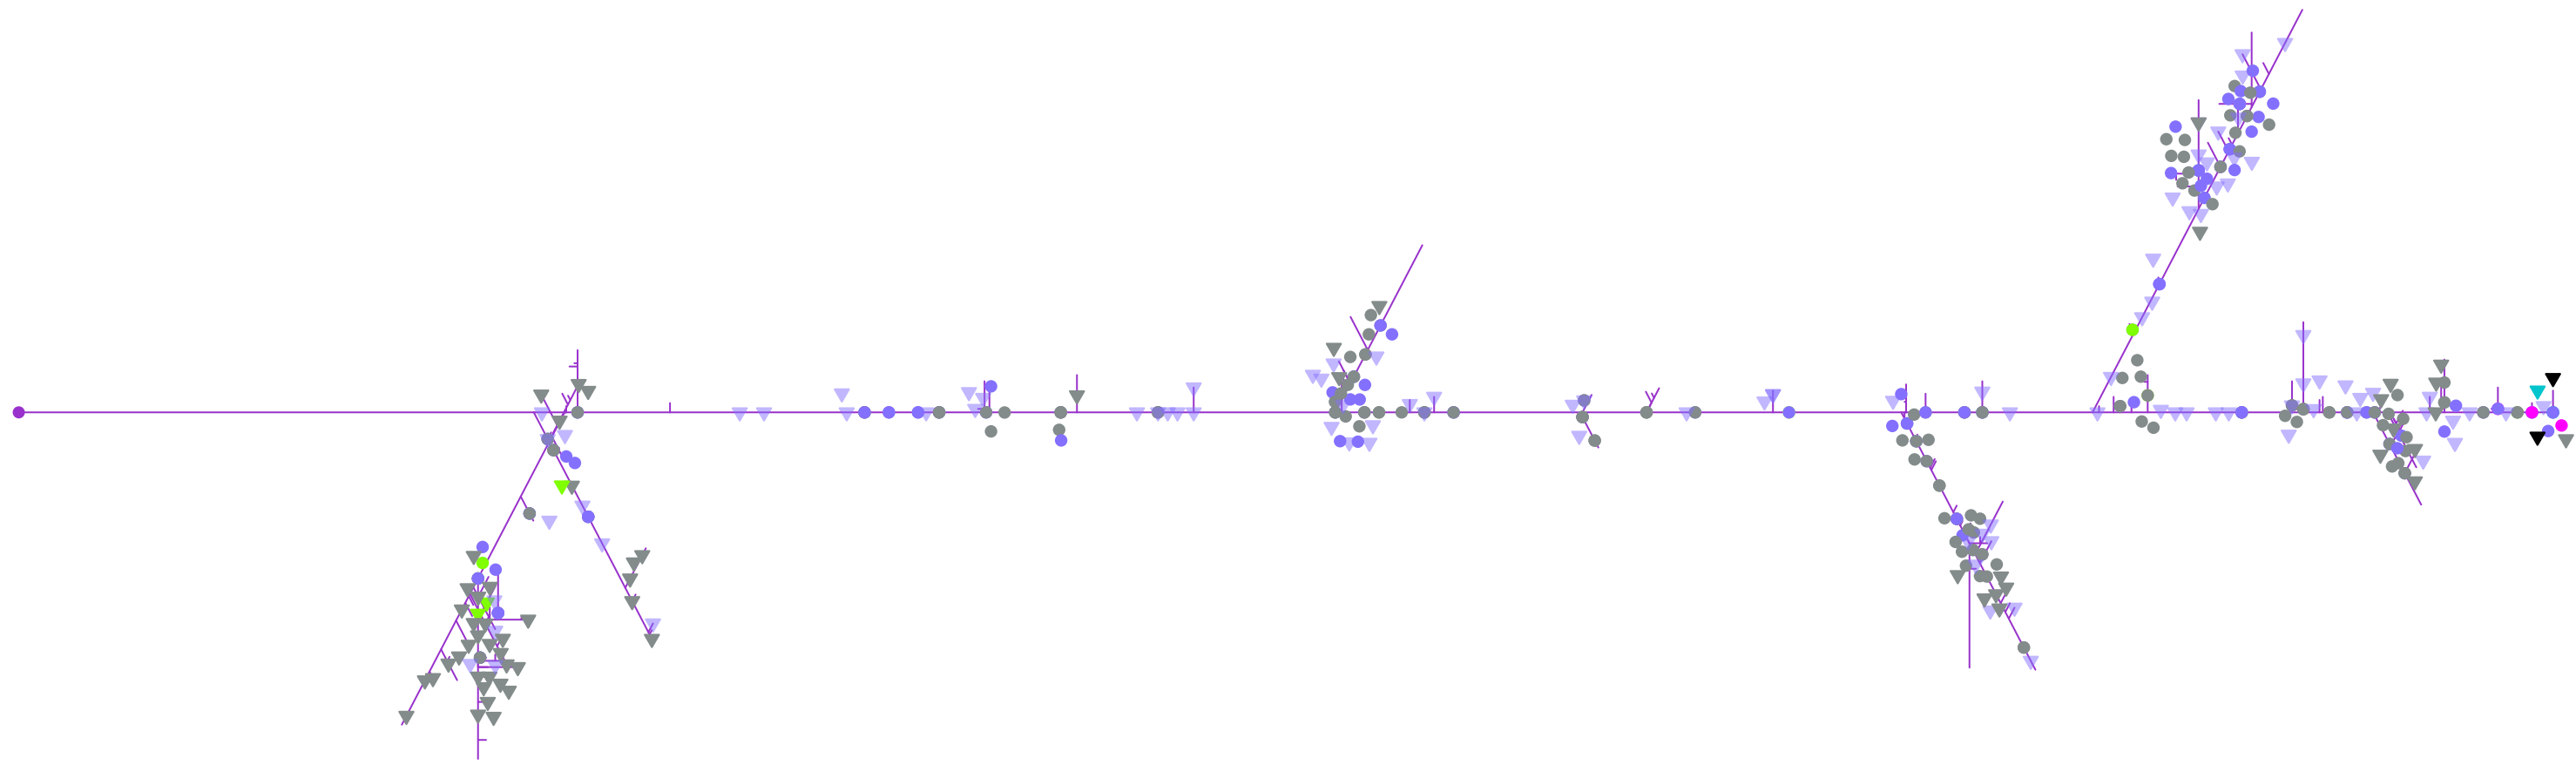

5 claw KC #8 (right)

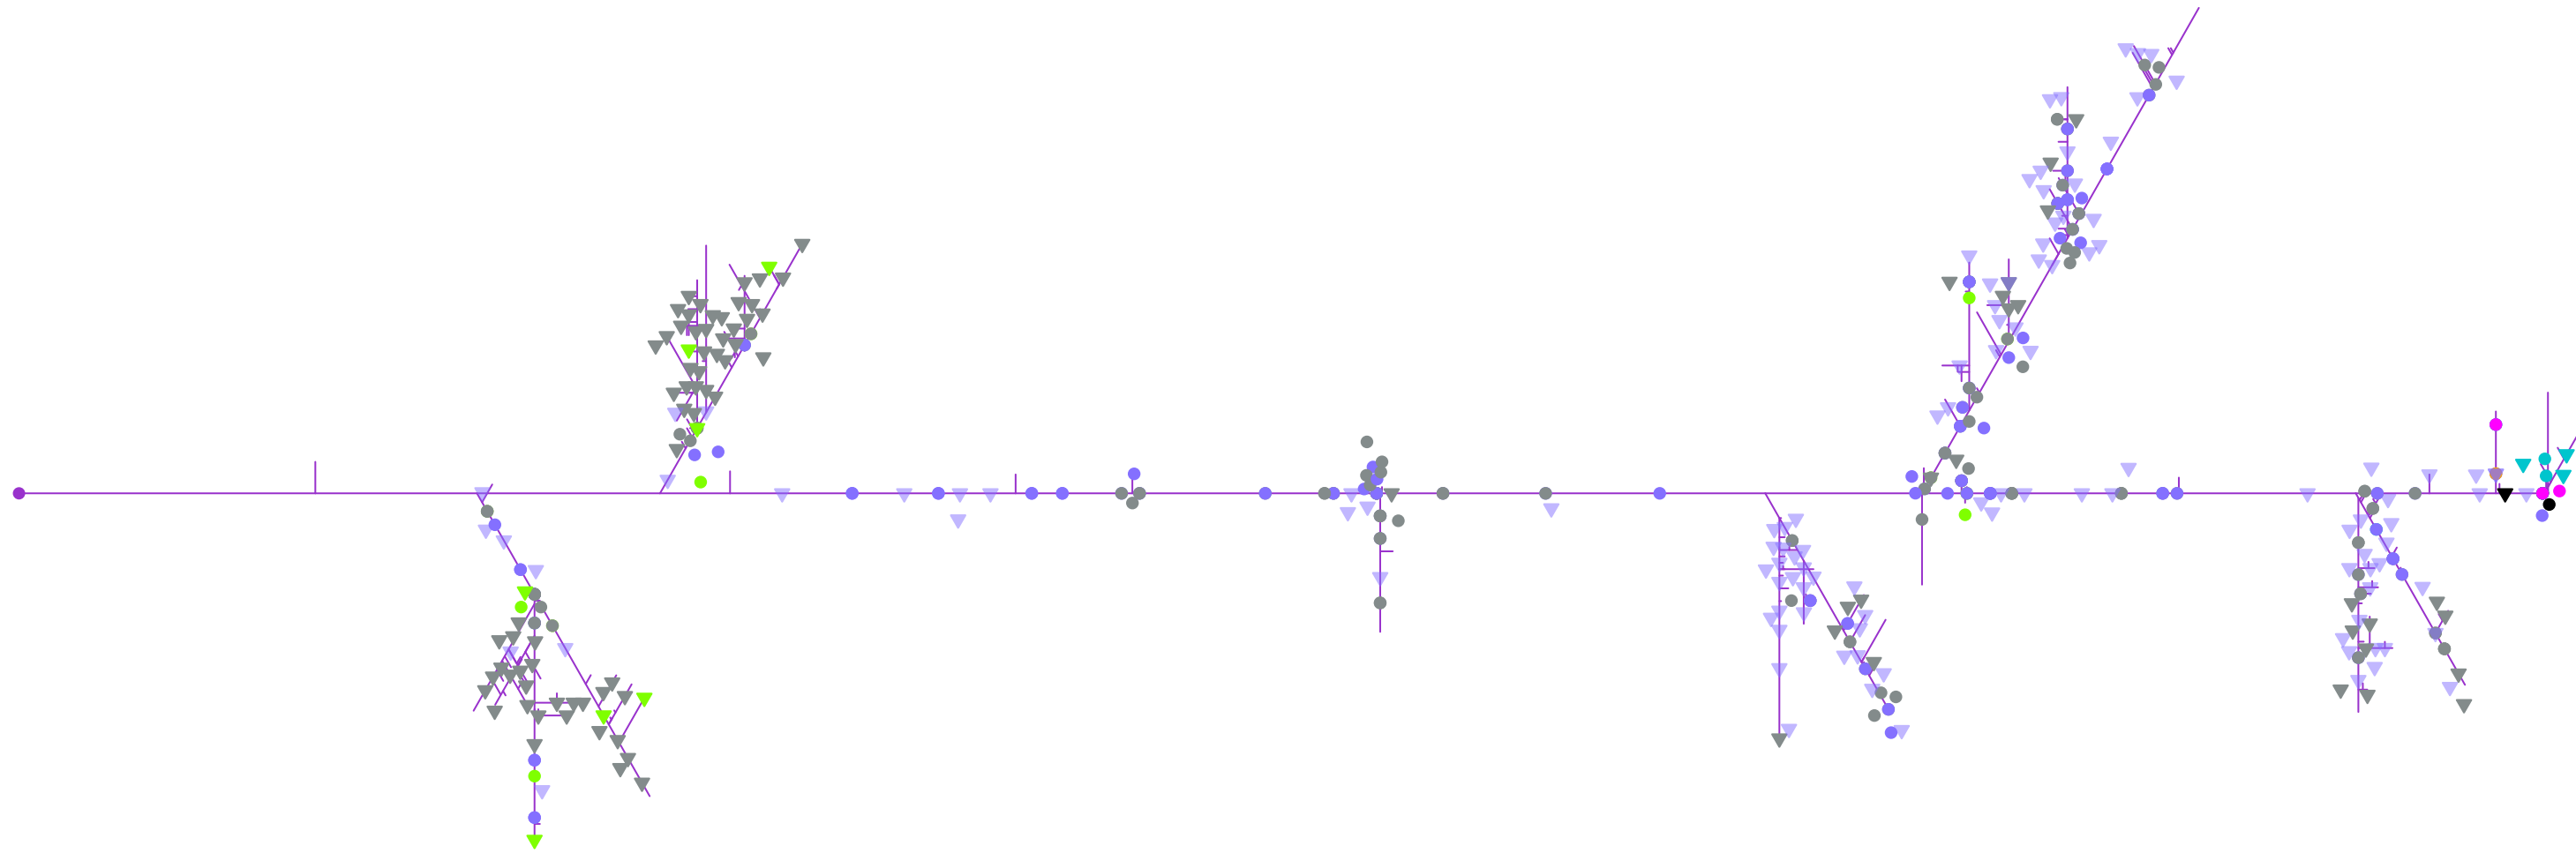

5 claw KC #9 (right)

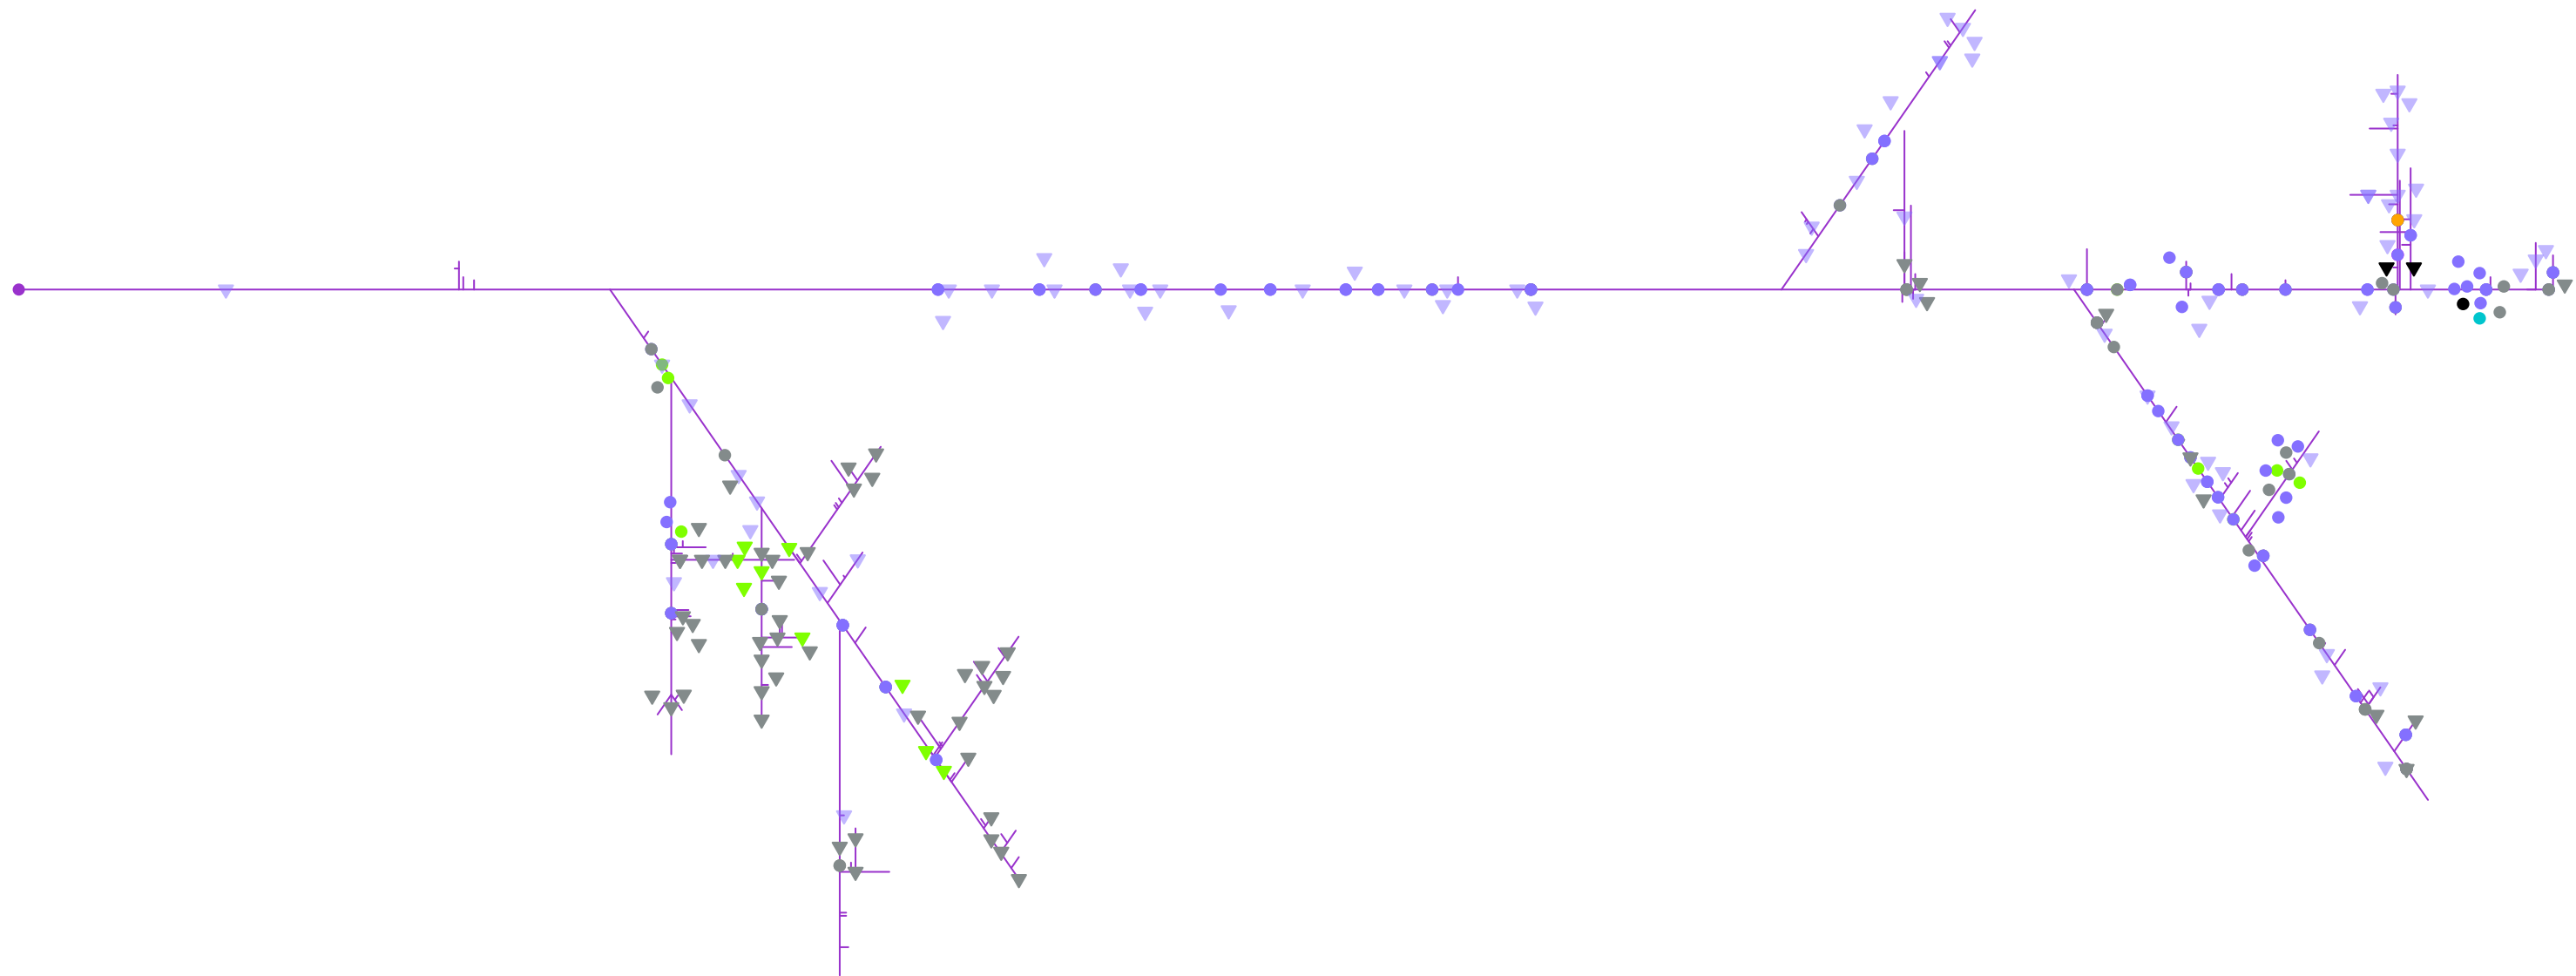

6 claw KC #1 (right)

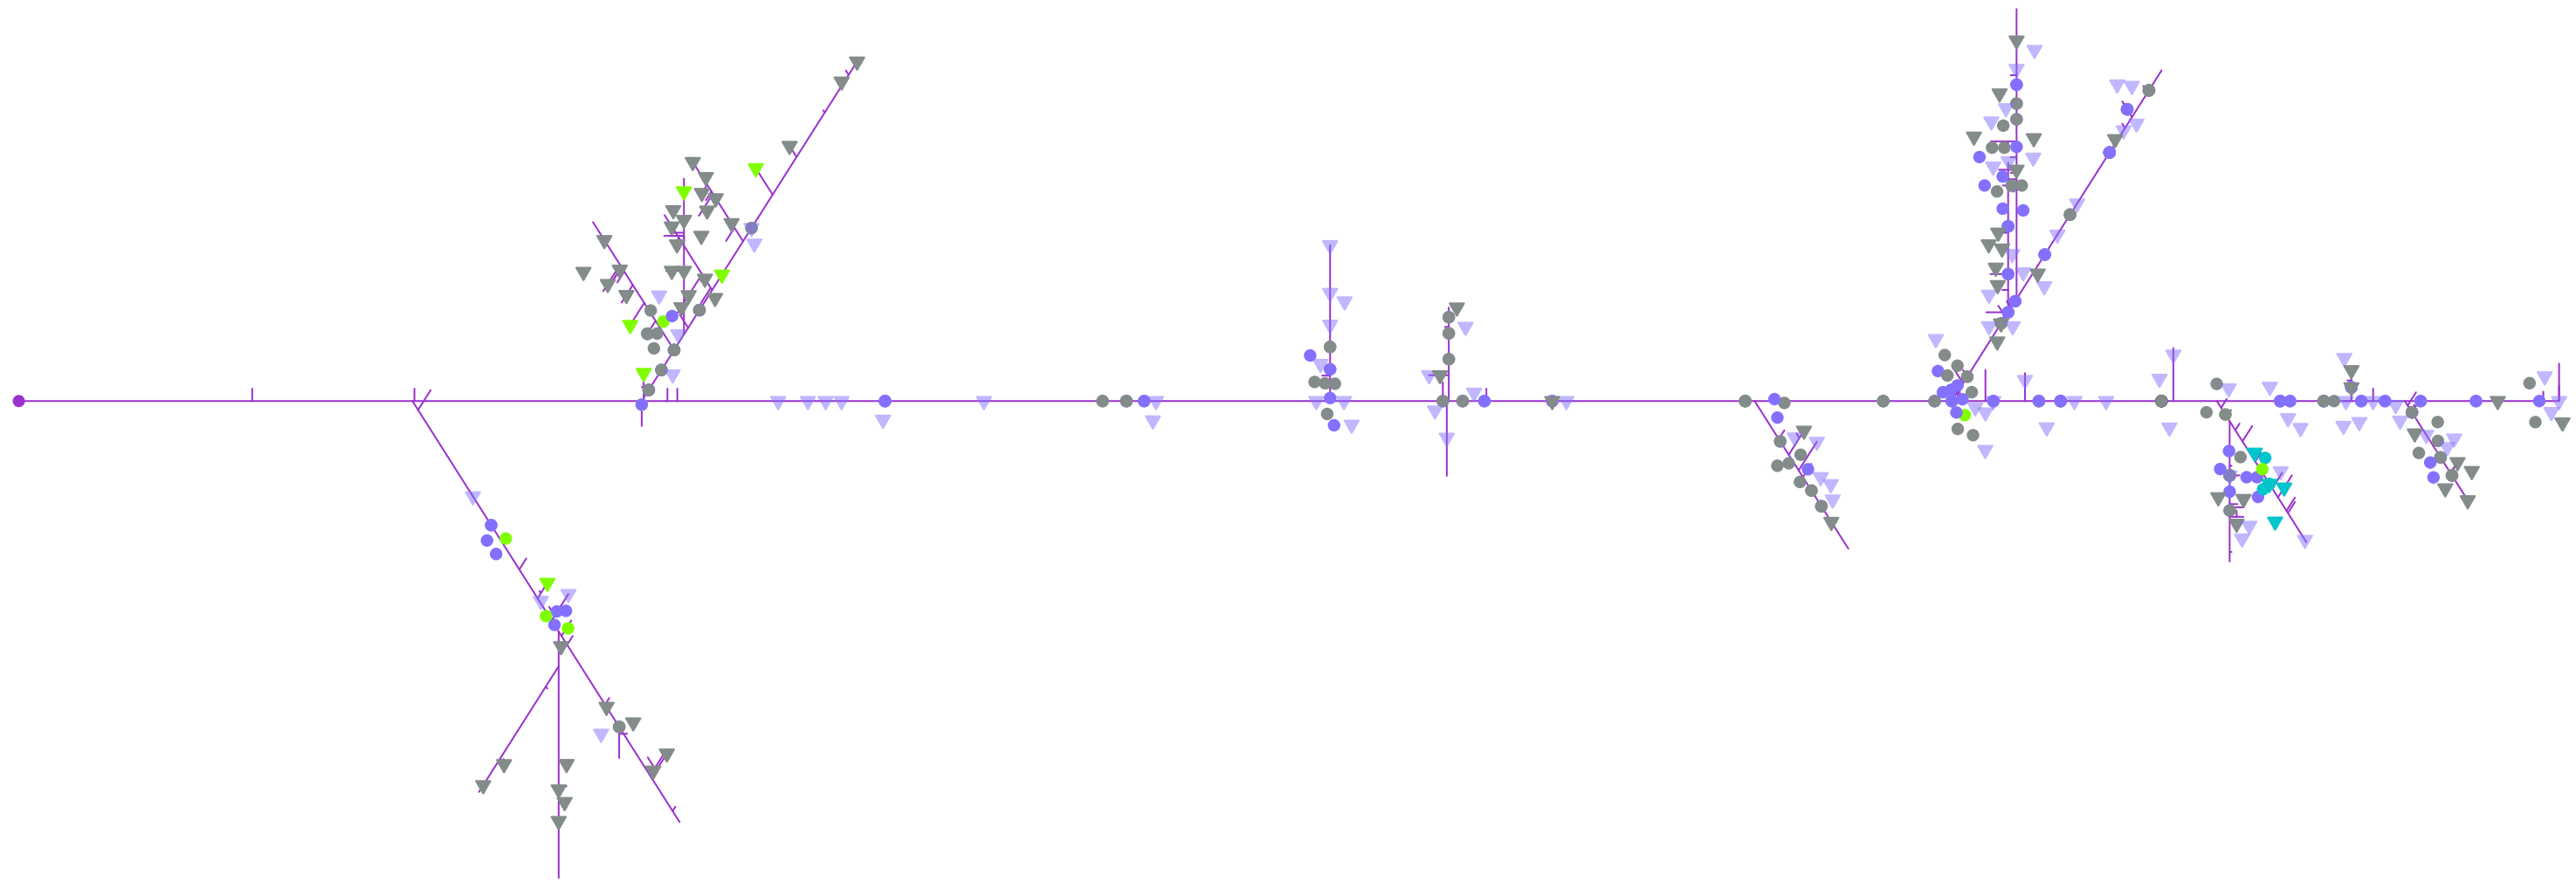



6 claw KC #2 (right)

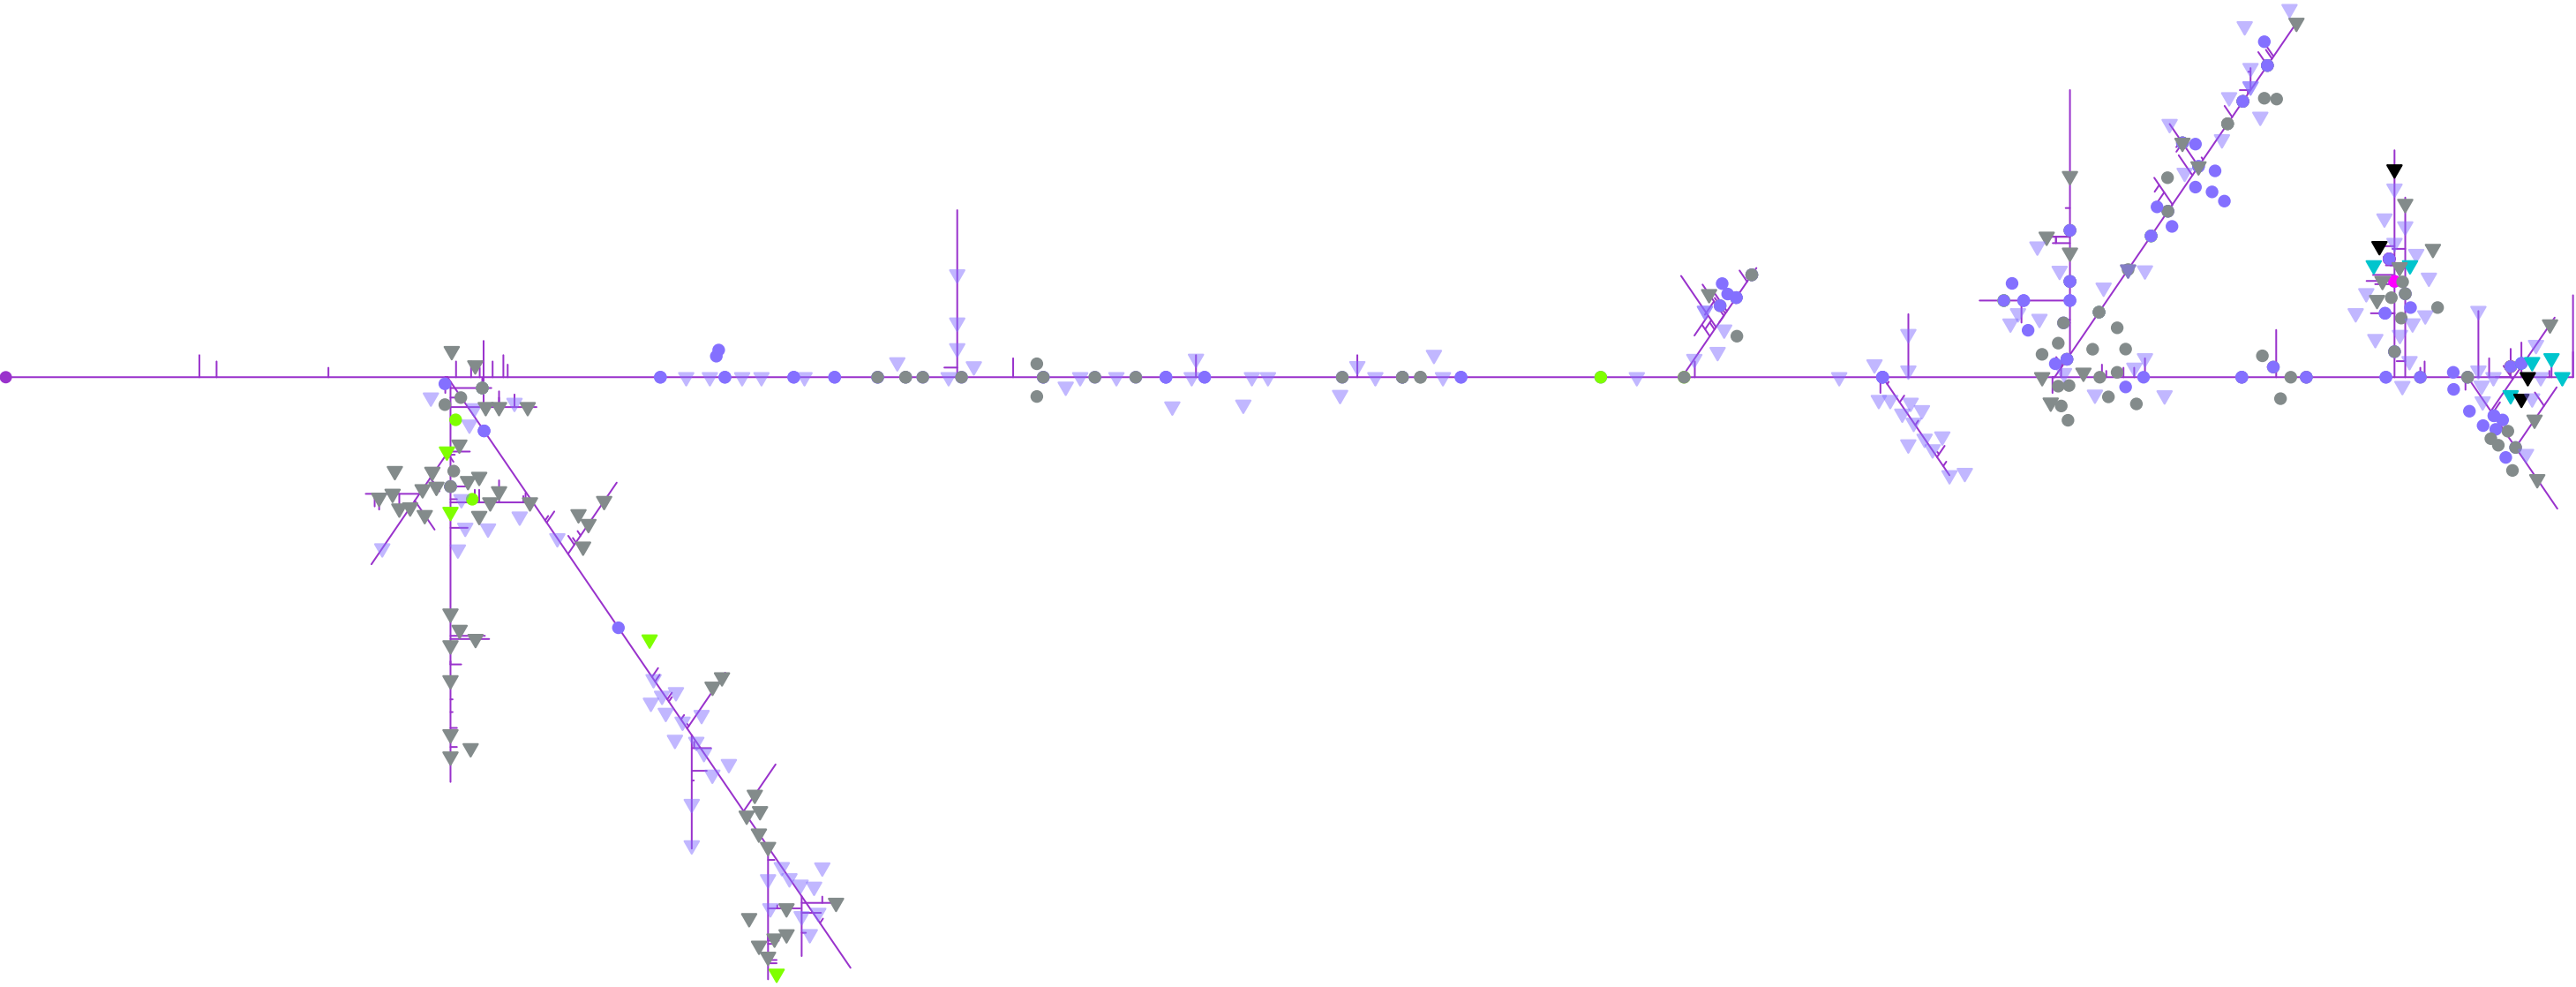

6 claw KC #3 (right)

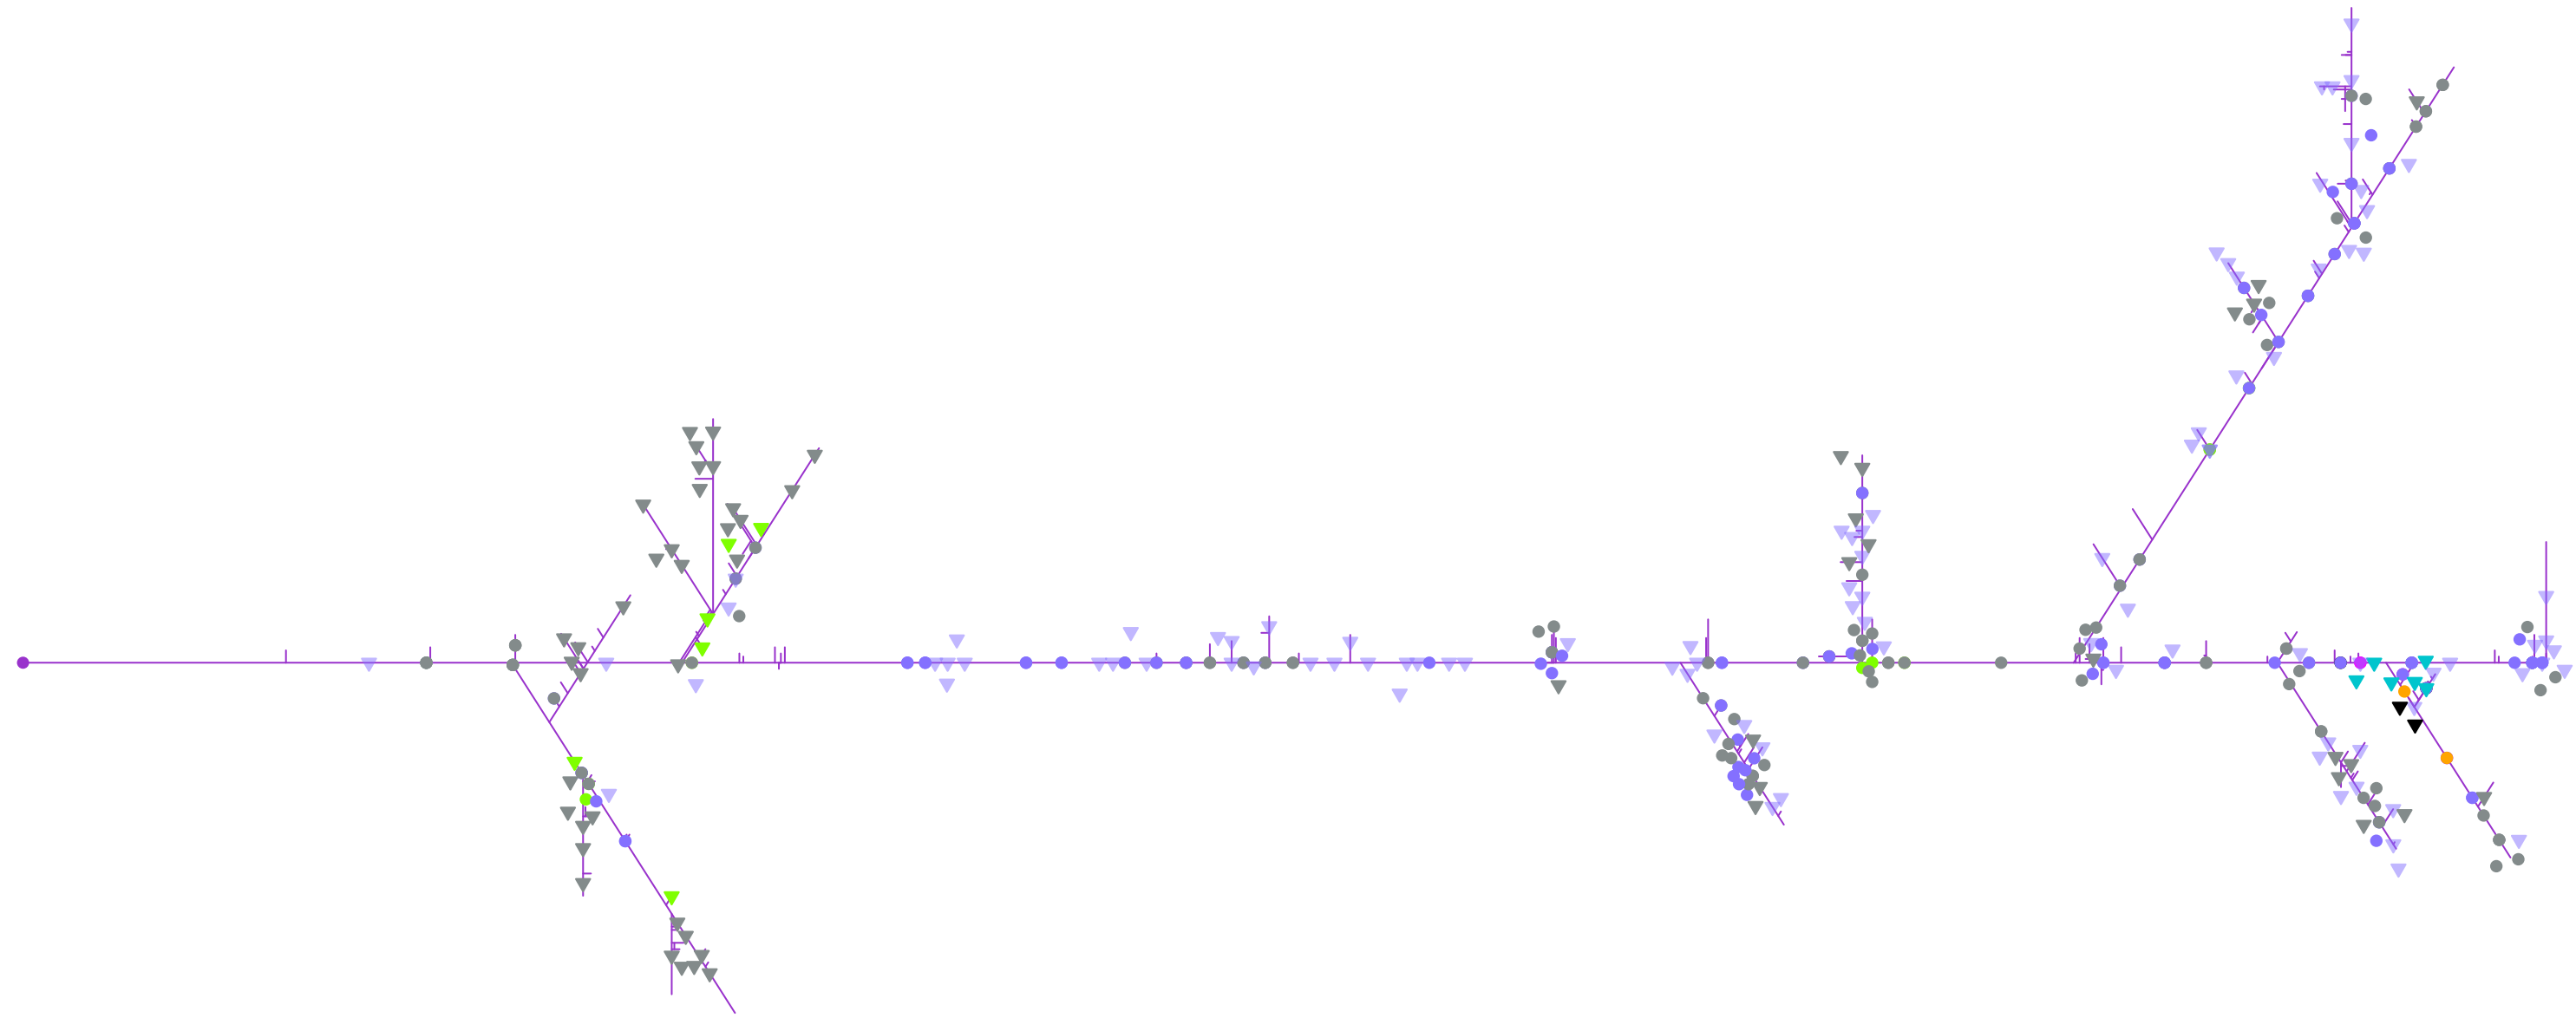

Supplement: ns-JN-RM-0290-20-s04.pdf [file ns-JN-RM-0290-20-s04.pdf]
