# Supplementary material
Source: PubMed Central journal article supplement (PMC7392503)

Schleyer et al.  
Extended data file Figure 2-2  
Dendrograms of the MBON-i1 neurons

Shown are high-resolution dendrograms of the two MBON-i1 neurons from both hemispheres. Output synapses are marked with colored circles, input synapses with colored triangles. The colors indicate which neuron the respective synapse is formed with. All other synapses within the mushroom body are labeled "Other". Not displayed are synapses that MBON-i1 forms with neurons outside the mushroom body. Stippled lines indicate regions where the neuron crosses the midline of the brain. Data are taken from Eichler et al. (2017).

Color legend:

- MBON-i1 → "Other"
- ▼ DAN-i1 left → MBON-i1
- ▼ DAN-i1 right → MBON-i1
- ▼ KC → MBON-i1
- ▼ "Other" → MBON-i1

MBON-i1 left

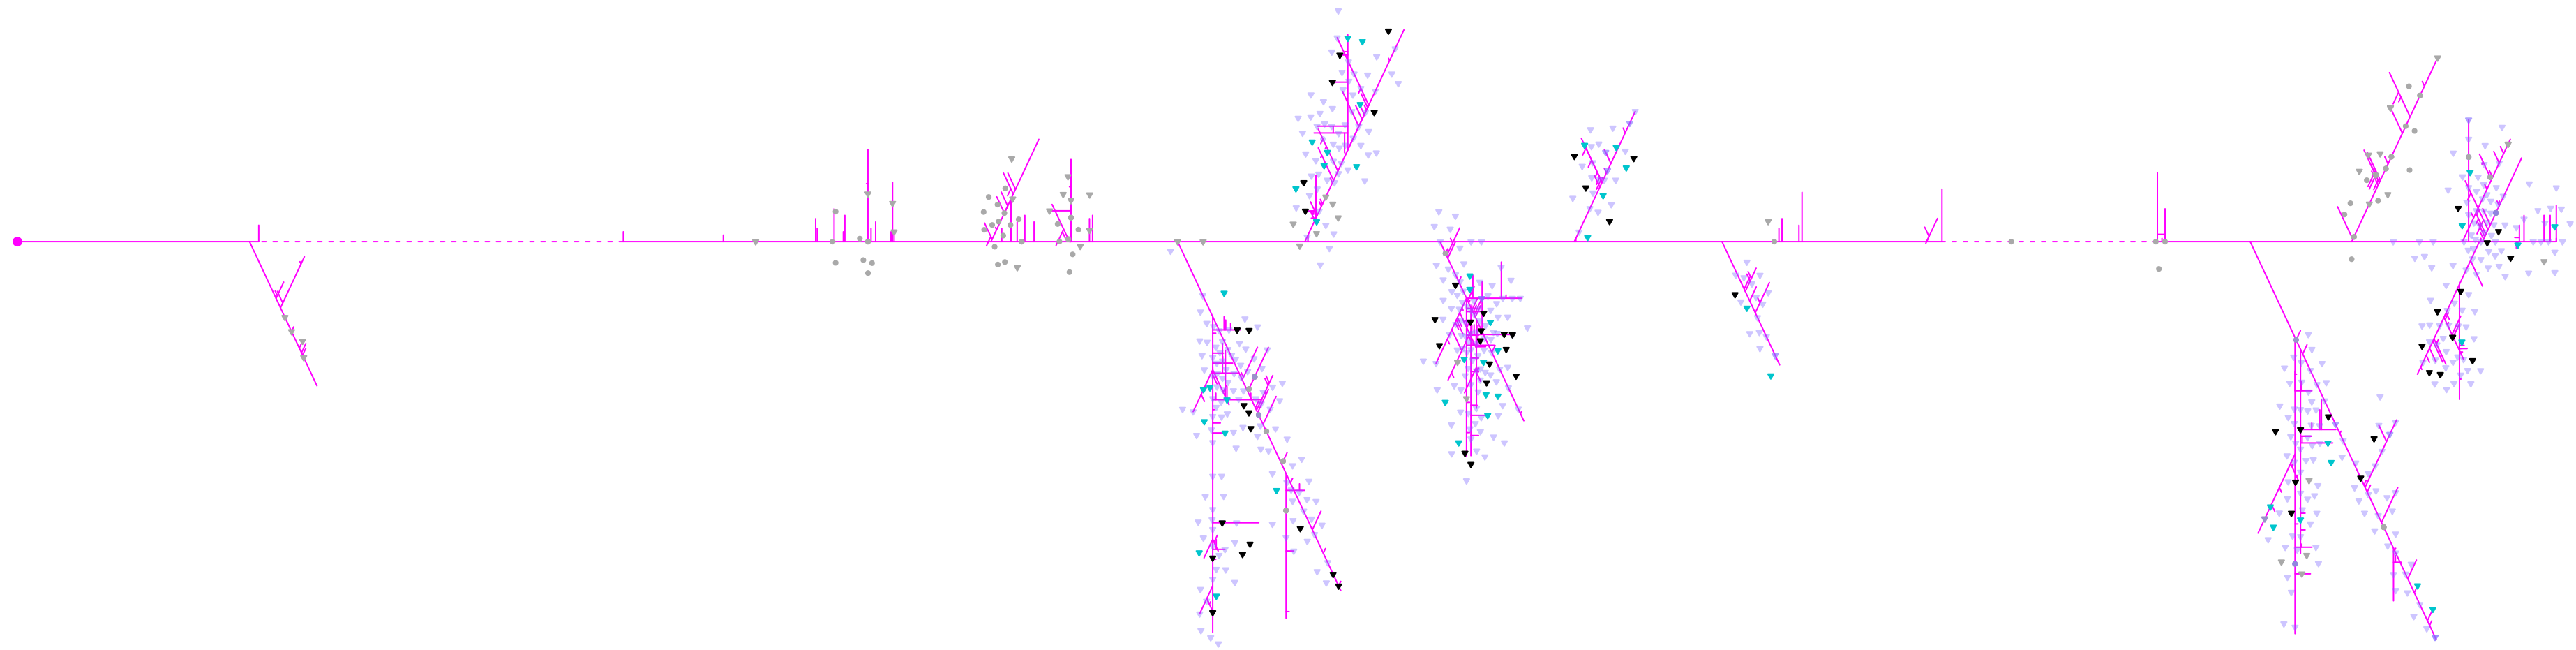

MBON-i1 right

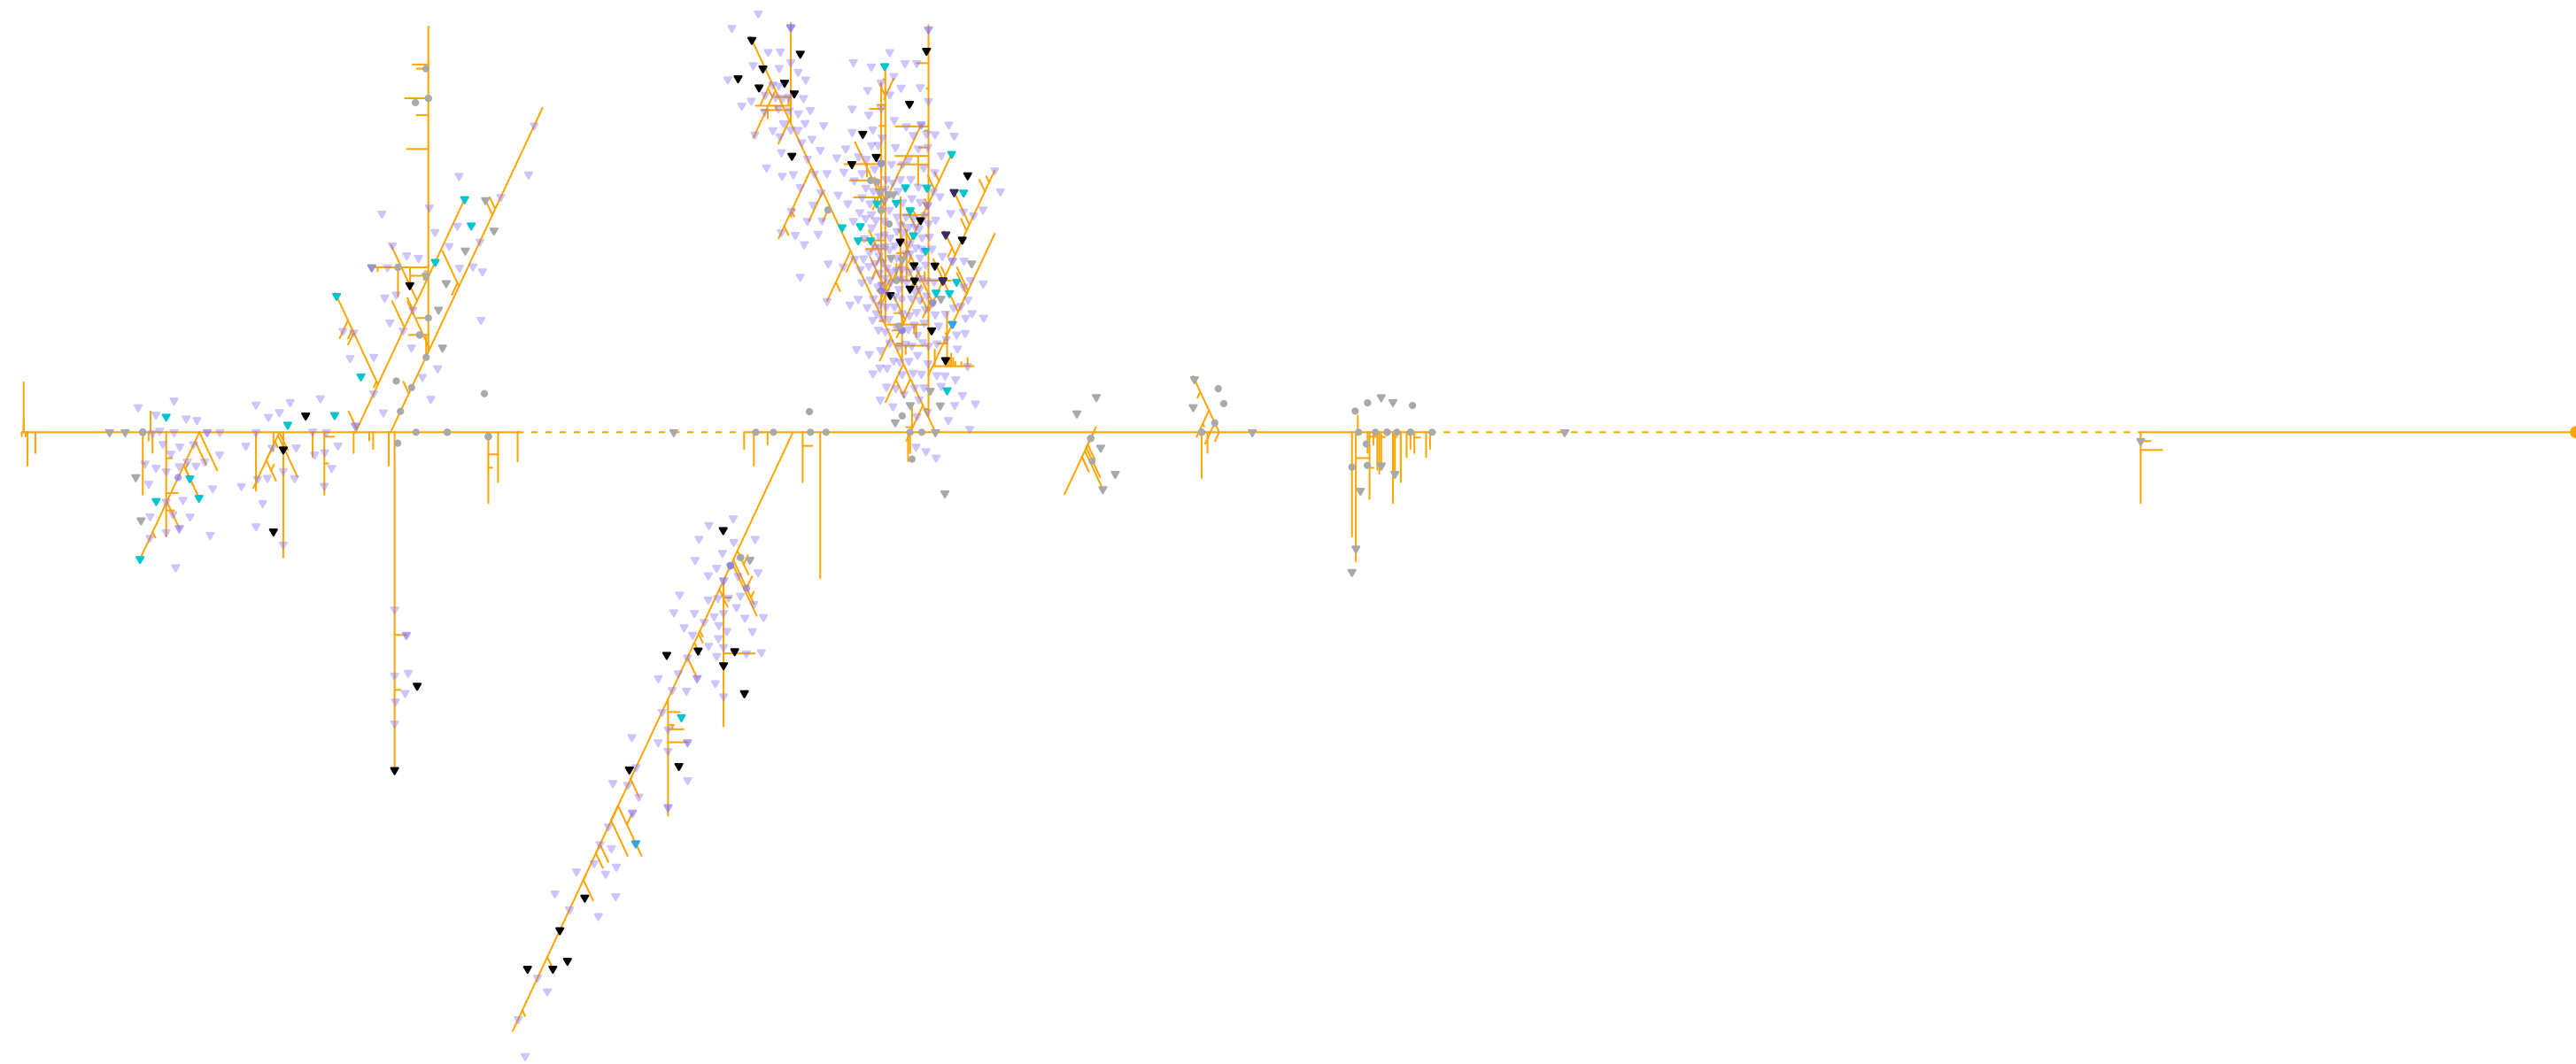

Supplement: ns-JN-RM-0290-20-s03.pdf [file ns-JN-RM-0290-20-s03.pdf]
